# Supplementary material for: Observational study of the differential impact of time-varying depressive symptoms on all-cause and cause-specific mortality by health status in community-dwelling adults: the REGARDS study
Source: PubMed Central journal article supplement — BMJ Open. 2018 Jan 5;8(1):e017385. doi: 10.1136/bmjopen-2017-017385 (PMC5780736; doi:10.1136/bmjopen-2017-017385), 2018-01-05

Supplementary Material

eTable 1. Proportion of persons with elevated depressive symptoms by baseline self-reported health status (original categories, without collapsing).

| Self-reported<br>general health | Baseline         |                  |          | Second CES-D                    |                  |             | Third CES-D     |                                  |             |  |
|---------------------------------|------------------|------------------|----------|---------------------------------|------------------|-------------|-----------------|----------------------------------|-------------|--|
|                                 | CES-D<4, n,<br>% | CES-D≥4,<br>n, % | Total, n | CESD<4,<br>n, %                 | CES-D≥4,<br>n, % | Total,<br>n | CESD<4,<br>n, % | CES-D≥4,<br>n, %                 | Total,<br>n |  |
| <b>Excellent</b>                | 4515<br>95.9 %   | 195<br>4.1%      | 4710     | 3444<br>94.7%                   | 194<br>5.3%      | 3638        | 2109<br>94.6%   | 120<br>5.4%                      | 2229        |  |
| <b>Very good</b>                | 8450<br>94.1%    | 530<br>5.9%      | 8980     | 6332<br>93.0%                   | 478<br>7.0%      | 6810        | 3938<br>92.8%   | 305<br>7.2%                      | 4243        |  |
| <b>Good</b>                     | 9181<br>89.1%    | 1124<br>10.9%    | 10305    | 6363<br>88.6%                   | 818<br>11.4%     | 7181        | 3717<br>88.9%   | 464<br>11.1%                     | 4181        |  |
| <b>Fair</b>                     | 3424<br>77.8 %   | 975<br>22.2 %    | 4399     | 2185<br>79.7%                   | 556<br>20.3%     | 2741        | 1236<br>82.0%   | 271<br>18.0%                     | 1507        |  |
| <b>Poor</b>                     | 614<br>59.2%     | 424<br>40.9%     | 1038     | 322<br>61.2%                    | 204<br>38.8%     | 526         | 177<br>65.3%    | 94<br>34.7%                      | 271         |  |
| <b>Frequency Missing = 59</b>   |                  |                  | 29432    | <b>Frequency Missing = 8595</b> |                  |             | 20896           | <b>Frequency Missing = 17060</b> |             |  |
|                                 |                  |                  |          |                                 |                  |             |                 |                                  |             |  |

**eTable 2. Reasons for non-cardiovascular disease death in the REGARDS study**

| <i>Causes of Death</i>            | Overall                 |         | Self-reported general health as “ <b>excellent or very good</b> ”<br>n=13,711 |                         | Self-reported general health as “ <b>poor, fair or good</b> ”<br>n=15,780 |         |
|-----------------------------------|-------------------------|---------|-------------------------------------------------------------------------------|-------------------------|---------------------------------------------------------------------------|---------|
|                                   | n                       | Percent | Frequency                                                                     | Percent                 | Frequency                                                                 | Percent |
| Cancer                            | 1226                    | 44.3    | 474                                                                           | 54.0                    | 747                                                                       | 39.7    |
| Accidents/Injury/Suicide/Homicide | 164                     | 5.9     | 52                                                                            | 5.9                     | 111                                                                       | 5.9     |
| Suicide                           | 3                       | 0.1     | 2                                                                             | 0.2                     | 1                                                                         | 0.05    |
| Liver disease                     | 56                      | 2.0     | 14                                                                            | 1.6                     | 42                                                                        | 2.2     |
| Infection                         | 498                     | 18.0    | 132                                                                           | 15.0                    | 365                                                                       | 19.4    |
| ESRD                              | 119                     | 4.3     | 23                                                                            | 2.6                     | 95                                                                        | 5.1     |
| Dementia                          | 187                     | 6.8     | 74                                                                            | 8.4                     | 112                                                                       | 6.0     |
| COPD                              | 247                     | 8.9     | 43                                                                            | 4.9                     | 204                                                                       | 10.9    |
| Pulmonary Embolism                | 38                      | 1.34    | 11                                                                            | 1.3                     | 27                                                                        | 1.4     |
| Other                             | 232                     | 8.4     | 55                                                                            | 6.3                     | 177                                                                       | 9.4     |
|                                   | Frequency Missing = 263 |         |                                                                               | Frequency Missing = 272 |                                                                           |         |

**eFigure 1. Percent of participants with depression measured at baseline who had their second and third follow up measured by years of follow up.**

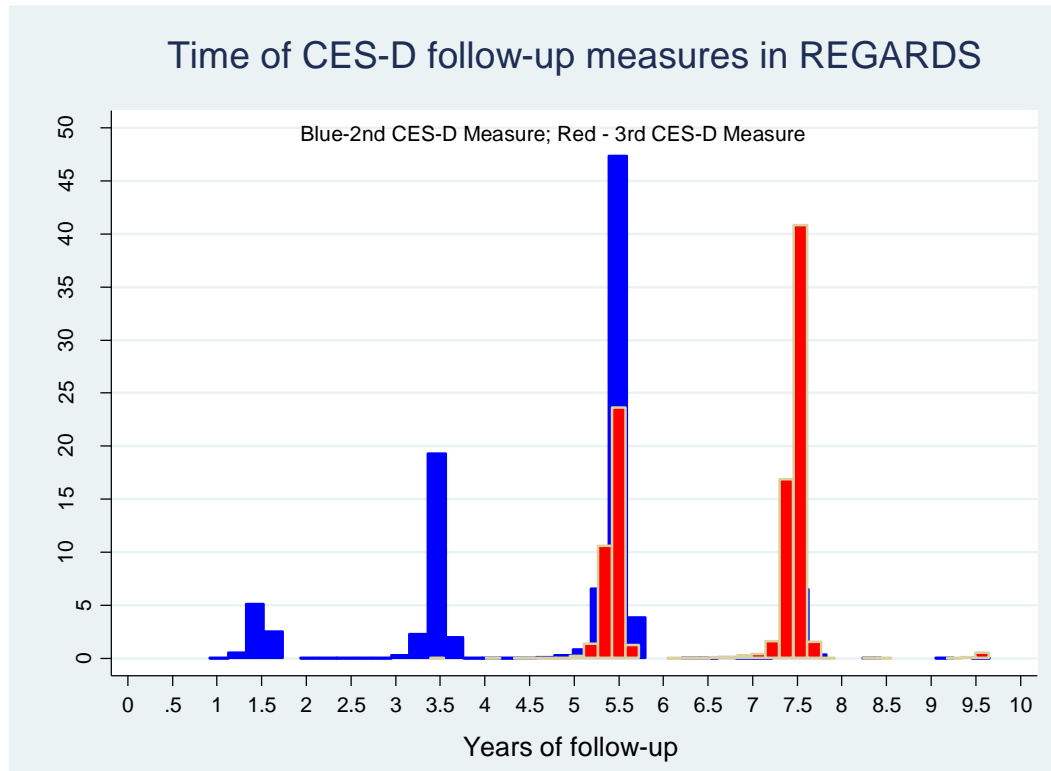

\*"Percent" is a proportion of participants reporting CES-D scores at certain times of all participants available for either 2<sup>nd</sup> follow-up (blue) or 3<sup>rd</sup> follow-up (red).

Time since preceding measurement (baseline or second follow-up), years

|              | Participants, n | Mean | SD  | Minimum | Maximum |
|--------------|-----------------|------|-----|---------|---------|
| Second CES-D | 20934           | 4.8  | 1.5 | 0.9     | 9.7     |
| Third CES-D  | 12451           | 2.1  | 0.4 | 1.0     | 4.2     |

**eFigure 2. Timing of CES-D follow up measures in REGARDS by self reported health at baseline.**

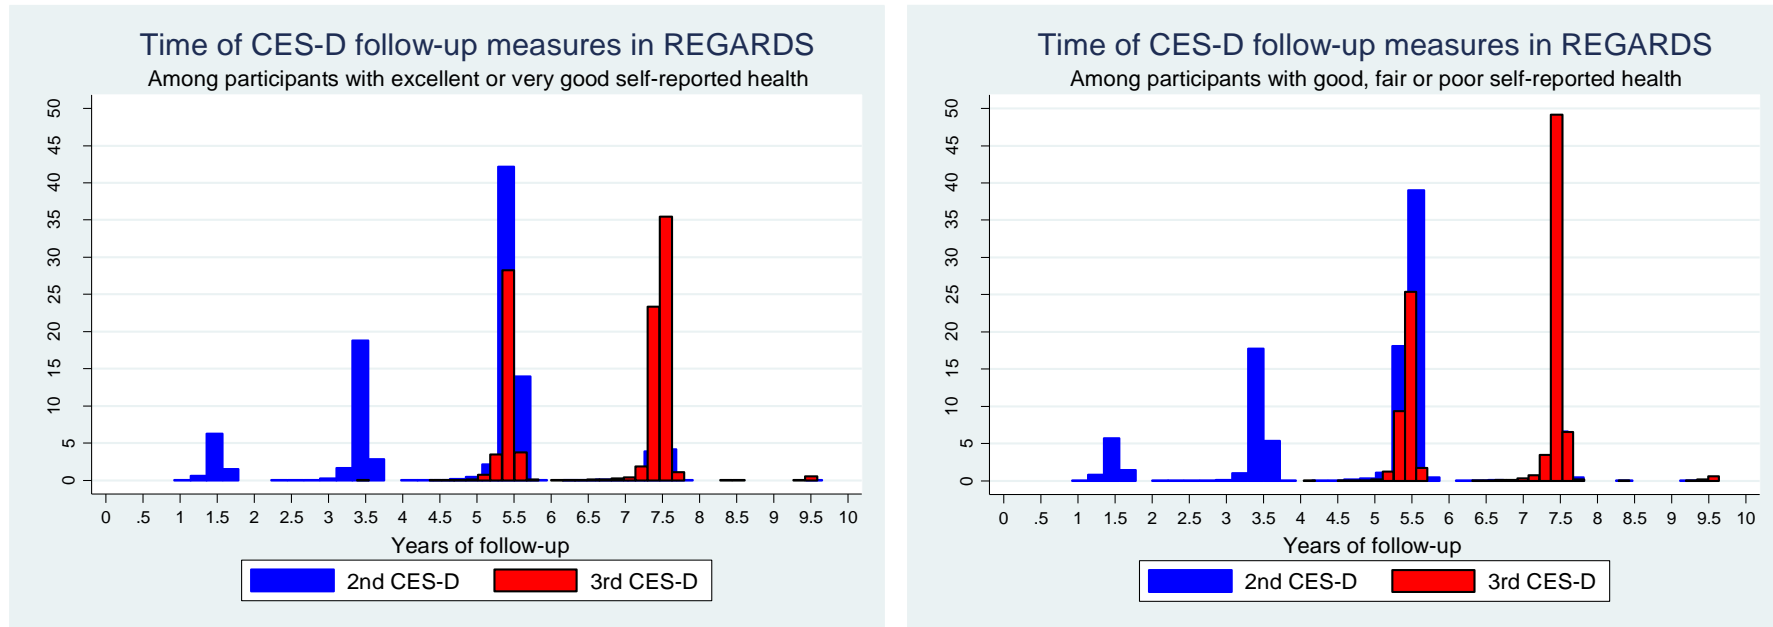

\*"Percent" is a proportion of participants reporting CES-D scores at certain times, of all participants available for either 2<sup>nd</sup> follow-up (blue) or 3<sup>rd</sup> follow-up (red).

| Self-reported general health as "excellent or very good" |       |                                                                              |     |         |         | Self-reported general health as "poor, fair or good" |                                                                              |     |         |         |
|----------------------------------------------------------|-------|------------------------------------------------------------------------------|-----|---------|---------|------------------------------------------------------|------------------------------------------------------------------------------|-----|---------|---------|
|                                                          |       | Time since preceding CES-D measurement (baseline or second follow-up), years |     |         |         |                                                      | Time since preceding CES-D measurement (baseline or second follow-up), years |     |         |         |
|                                                          | N     | Mean                                                                         | SD  | Minimum | Maximum | N                                                    | Mean                                                                         | SD  | Minimum | Maximum |
| Second CES-D                                             | 10448 | 4.8                                                                          | 1.5 | 0.9     | 9.7     | 10448                                                | 4.8                                                                          | 1.5 | 0.9     | 9.5     |
| Third CES-D                                              | 6472  | 2.1                                                                          | 0.4 | 1.7     | 4.2     | 5959                                                 | 2.1                                                                          | 0.5 | 1.0     | 4.2     |

**eTable 3. Baseline characteristics of REGARDS participants who had all 3 CES-D measures vs. those with 1 or 2 CES-D measures**

| Characteristics                                          | 1 or 2 CES-D measures<br>(n=17,040) | All 3 CES-D measures<br>(n=12, 451) | <i>p</i> value |
|----------------------------------------------------------|-------------------------------------|-------------------------------------|----------------|
| <b><i>Socio-demographics</i></b>                         |                                     |                                     |                |
| Age, <i>M</i> (SD)                                       | 65.0 +- 10.0                        | 64.7 +- 8.5                         | 0.0069         |
| Female, n (%)                                            | 9300 (54.6)                         | 6945 (55.8)                         | 0.04           |
| African American, n (%)                                  | 7709 (45.2)                         | 4420 (35.5)                         | <.001          |
| Less than high school education, n (%)                   | 2583 (15.2)                         | 1113 (8.9)                          | <.001          |
| Annual Household Income, n (%)                           |                                     |                                     | <.001          |
| Less than \$20,000                                       | 3549 (20.8)                         | 1773 (14.2)                         |                |
| No Health Insurance, n (%)                               | 1290 (7.6)                          | 636 (5.1)                           | <.001          |
| Region, n (%)                                            |                                     |                                     | <.001          |
| Stroke belt                                              | 5806 (34.1)                         | 4387 (35.2)                         |                |
| Stroke buckle                                            | 3887 (22.8)                         | 2301 (18.5)                         |                |
| Non-stroke belt or buckle                                | 7347 (43.1)                         | 5763 (46.3)                         |                |
| <b><i>General health and medical conditions</i></b>      |                                     |                                     |                |
| Self-reported general health, n (%)                      |                                     |                                     | <.001          |
| Poor, fair, good                                         | 9783 (57.5)                         | 5959 (47.9)                         |                |
| Excellent, very good                                     | 7218 (42.5)                         | 6472 (52.1)                         |                |
| Cardiovascular disease (CHD, stroke, PAD, AA), n (%)     | 4379 (25.7)                         | 2446 (19.6)                         | <.001          |
| Diabetes, n (%)                                          | 4083 (25.0)                         | 2169 (18.0)                         | <.001          |
| COPD, n (%)                                              | 1612 (9.5)                          | 1098 (8.8)                          | 0.05           |
| Physical component score on SF-12 scale, <i>M</i> (SD)   | 45.5 +- 11.0                        | 47.6 +- 9.9                         | <.001          |
| <b><i>Physiological risk factors</i></b>                 |                                     |                                     |                |
| Body Mass Index, kg/m <sup>2</sup> , <i>M</i> (SD)       | 29.4 +- 6.3                         | 29.2 +- 6.0                         | 0.0024         |
| Systolic Blood Pressure, mmHg, <i>M</i> (SD)             | 128.0 +- 17.2                       | 127.0 +- 15.9                       | <.001          |
| Total Cholesterol, mg/dL, <i>M</i> (SD)                  | 192.2 +- 41.0                       | 191.9 +- 39.0                       | 0.5732         |
| High-Density Lipoprotein, mg/dL, <i>M</i> (SD)           | 51.4 +- 16.1                        | 52.4 +- 16.3                        | <.001          |
| QT Interval, corrected for heart rate, ms, <i>M</i> (SD) | 408.4 +- 24.2                       | 406.3 +- 22.7                       | <.001          |
| High-Sensitivity C-Reactive Protein, mg/L, median, IQR   | 2.3[1.0-5.4]                        | 2.1[0.9-4.7]                        | <.001          |

|                                                      |               |               |       |
|------------------------------------------------------|---------------|---------------|-------|
| Albumin to Creatinine Ratio, mg/g, median, IQR       | 7.9[4.8-18.7] | 6.9[4.5-13.5] | <.001 |
| <b>Medications</b>                                   |               |               |       |
| Antihypertensive medication use, n (%)               | 9079 (53.9)   | 6118 (49.7)   | <.001 |
| Statin use, n (%)                                    | 5344 (31.4)   | 3951 (31.8)   | 0.53  |
| Aspirin use, n (%)                                   | 7297 (42.8)   | 5493 (44.1)   | 0.03  |
| Antidepressant use, n (%)                            | 2440 (14.4)   | 1646 (13.2)   | 0.006 |
| <b>Behavioral risk factors</b>                       |               |               |       |
| Self-reported smoking, pack years, <i>M</i> (SD)     | 14.5 +- 24.4  | 12.2 +- 21.0  | <.001 |
| Current Smoking, n(%)                                | 2786 (16.4)   | 1477 (11.9)   | <.001 |
| Alcohol use, n (%)                                   |               |               | <.001 |
| Heavy                                                | 652 (3.9)     | 520 (4.2)     |       |
| Moderate                                             | 5180 (31.1)   | 4446 (36.3)   |       |
| None                                                 | 10822 (65.0)  | 7294 (59.5)   |       |
| Physical inactivity, n (%)                           | 6150 (36.7)   | 3854 (31.3)   | <.001 |
| Medication non-adherence, n (%)                      | 4548 (29.6)   | 3411 (29.9)   | 0.59  |
| Impaired cognitive status (Cognitive score $\leq$ 4) | 1300 (9.4)    | 588 (5.9)     | <.001 |
| Elevated perceived stress (PSS $\geq$ 5)             | 5437 (31.9)   | 3154 (25.3)   | <.001 |

*p* Values from chi square, Student t tests. CES-D = Centers for Epidemiology Studies – Depression scale. CVD = cardiovascular disease. IQR = interquartile range. *M* = mean. SD = standard deviation.

Stroke Belt defined as the states of Alabama, Arkansas, Louisiana, Mississippi, Tennessee and the noncoastal regions within the states of North Carolina, South Carolina and Georgia. Stroke buckle defined as coastal regions within the states of North Carolina, South Carolina and Georgia.

Diabetes defined as fasting blood glucose  $\geq$ 126 or random glucose  $>$ 200 mL/dL or oral hypoglycemic or insulin use. CVD defined as baseline coronary heart disease, stroke, periphery artery disease or aortic aneurism.

**eFigure 3. Simon and Makuch plots of time-varying depressive symptoms and all-cause mortality, cardiovascular disease death, noncardiovascular disease death and cancer death.**

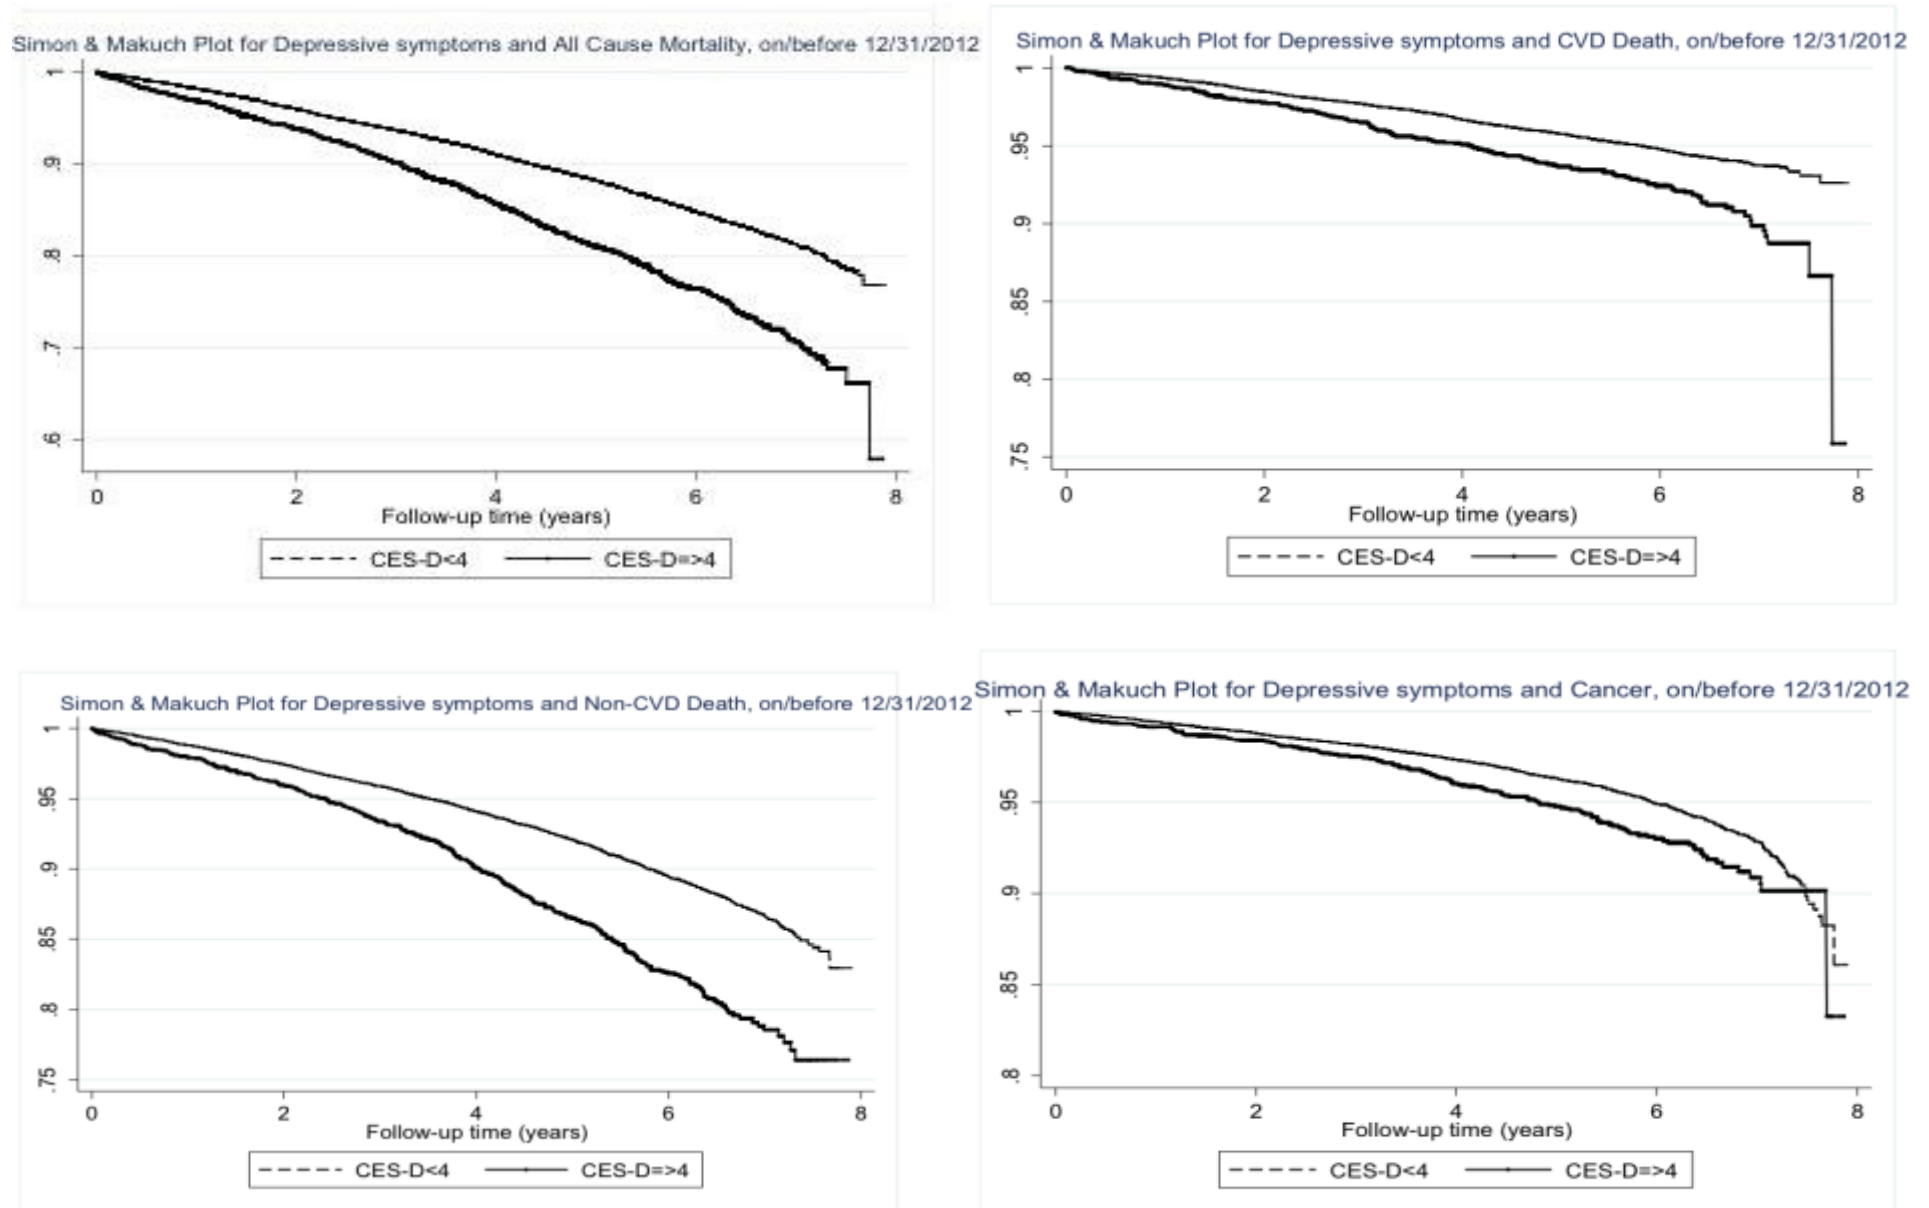

Supplement: bmjopen-2017-017385supp001.pdf [file bmjopen-2017-017385supp001.pdf]
