# Supplementary material for: Observational study of the differential impact of time-varying depressive symptoms on all-cause and cause-specific mortality by health status in community-dwelling adults: the REGARDS study
Source: PubMed Central journal article supplement — BMJ Open. 2018 Jan 5;8(1):e017385. doi: 10.1136/bmjopen-2017-017385 (PMC5780736; doi:10.1136/bmjopen-2017-017385), 2018-01-05
Supplement: bmjopen-2017-017385.draft_revisions.pdf [file bmjopen-2017-017385.draft_revisions.pdf]

# BMJ Open

BMJ Open is committed to open peer review. As part of this commitment we make the peer review history of every article we publish publicly available.

When an article is published we post the peer reviewers' comments and the authors' responses online. We also post the versions of the paper that were used during peer review. These are the versions that the peer review comments apply to.

The versions of the paper that follow are the versions that were submitted during the peer review process. They are not the versions of record or the final published versions. They should not be cited or distributed as the published version of this manuscript.

BMJ Open is an open access journal and the full, final, typeset and author-corrected version of record of the manuscript is available on our site with no access controls, subscription charges or pay-per-view fees (<http://bmjopen.bmj.com>).

If you have any questions on BMJ Open's open peer review process please email [editorial.bmjopen@bmj.com](mailto:editorial.bmjopen@bmj.com)

# BMJ Open

## Differential impact of time-varying depressive symptoms on all-cause and cause-specific mortality by health status: The REGARDS study

|                                 |                                                                                                                                                                                                                                                                                                                                                                                                                                                                                                                                                            |
|---------------------------------|------------------------------------------------------------------------------------------------------------------------------------------------------------------------------------------------------------------------------------------------------------------------------------------------------------------------------------------------------------------------------------------------------------------------------------------------------------------------------------------------------------------------------------------------------------|
| Journal:                        | <i>BMJ Open</i>                                                                                                                                                                                                                                                                                                                                                                                                                                                                                                                                            |
| Manuscript ID                   | bmjopen-2017-017385                                                                                                                                                                                                                                                                                                                                                                                                                                                                                                                                        |
| Article Type:                   | Research                                                                                                                                                                                                                                                                                                                                                                                                                                                                                                                                                   |
| Date Submitted by the Author:   | 27-Apr-2017                                                                                                                                                                                                                                                                                                                                                                                                                                                                                                                                                |
| Complete List of Authors:       | Moise, Nathalie; Columbia University Medical Center, Center for Behavioral Cardiovascular Health<br>Khodneva, Yulia; University of Alabama School of Medicine<br>Richman, Joshua; University of Alabama School of Medicine<br>Davidson, Karina; Columbia University Medical Center, Medicine<br>Kronish, Ian M. ; Columbia University Medical Center, Center Behavioral Cardiovascular Health<br>Shaffer, Jonathan; University of Colorado Denver Department of Psychology<br>Safford, Monika; Cornell University Joan and Sanford I Weill Medical College |
| <b>Primary Subject Heading</b>: | Mental health                                                                                                                                                                                                                                                                                                                                                                                                                                                                                                                                              |
| Secondary Subject Heading:      | Mental health                                                                                                                                                                                                                                                                                                                                                                                                                                                                                                                                              |
| Keywords:                       | mortality, health status, Depression & mood disorders < PSYCHIATRY                                                                                                                                                                                                                                                                                                                                                                                                                                                                                         |
|                                 |                                                                                                                                                                                                                                                                                                                                                                                                                                                                                                                                                            |

SCHOLARONE™  
Manuscripts

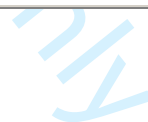

1 **Differential impact of time-varying depressive symptoms on all-cause and cause-specific**  
2  
3 **mortality by health status: The REGARDS study**

4  
5 **Running Title:** depressive symptoms and mortality  
6

7  
8 **Authors:** Nathalie Moise, MD, MS<sup>1</sup> (assistant professor); Yulia Khodneva, MD, PhD<sup>2</sup> (medical  
9 resident); Joshua Richman, MD, PhD<sup>2</sup> (professor); Karina W. Davidson, PhD<sup>1</sup> (professor); Ian  
10 M. Kronish, MD, MPH<sup>1</sup> (assistant professor); Jonathan Shaffer, PhD<sup>3</sup> (assistant professor);  
11  
12 Monika M. Safford, MD<sup>4</sup> (professor)  
13

14  
15 **Affiliations:** <sup>1</sup>Center for Behavioral Cardiovascular Health, Department of Medicine, Division of  
16 Cardiology, Columbia University Medical Center, New York, NY; <sup>2</sup>University of Alabama at  
17 Birmingham, Birmingham, AL; <sup>3</sup>Department of Psychology, University of Colorado Denver;  
18  
19 <sup>4</sup>Weill Cornell Medical College, New York, NY.  
20

21  
22 **Corresponding Author:**

23 Nathalie Moise, MD, MS  
24 Center for Behavioral and Cardiovascular Health, Department of Medicine  
25 Columbia University Medical Center  
26 622 W. 168<sup>th</sup> Street, PH9- Room 321  
27 New York, NY 10032  
28 Phone: 212-342-2889  
29 Fax: 212-342-3431  
30 Email: [nm2562@cumc.columbia.edu](mailto:nm2562@cumc.columbia.edu)  
31

32  
33 **Journal Subject Codes:** mortality, depression, health status  
34

35 **Total Document Text Count:** 2633  
36

37 **Abstract:** 226/300  
38  
39  
40  
41  
42  
43  
44  
45  
46  
47  
48  
49  
50  
51  
52  
53  
54  
55  
56  
57  
58  
59  
60

## Abstract

**Objective:** To assess the association between time varying depressive symptoms with all-cause

**Design:** The Reasons for Geographic and Racial Differences in Stroke (REGARDS) is a national, population-based longitudinal study conducted from 2003-2007.

**Setting:** General continental U.S. communities

**Participants:** 29,491 black and white U.S. adults  $\geq 45$  years randomly sampled within race-sex-geographic strata.

**Exposure:** Elevated depressive symptoms (CES-D-4  $\geq 4$ ) measured at baseline and on average 5 and 7 years later.

**Main Outcome Measures:** Cox proportional hazard regression models assessed cancer, non-cardiovascular (CVD), CVD and all-cause mortality.

**Results:** The average age was 64.9 years; 55% were female; 41% black; 11.0% had elevated depressive symptoms; 54% had poor, fair or good health. Time-varying depressive symptoms were significantly associated with nonCVD (aHR=1.29, 95% CI 1.16-1.44) and all-cause (aHR=1.24, 95%CI 1.14-1.39), but not cancer (aHR=1.15, 95%CI 0.96-1.38) or CVD (aHR=1.13, 95%CI 0.98-1.32) death adjusting for demographics, chronic clinical diseases, behavioral risk factors, and physiologic factors. Depressive symptoms were related to all-cause (aHR=1.48, 95%CI 1.27-1.78), CVD (aHR=1.37, 95%CI 0.99-1.91), nonCVD (aHR=1.54, 95%CI 1.24-1.92) and cancer (aHR=1.36 95% 0.97-1.91) death in those who reported excellent or very good health. Baseline analyses yielded similar results.

**Conclusions:** Time varying depressive symptoms confer an increased risk for all-cause mortality, CVD, non-CVD death and cancer death, particularly in those with excellent or very good health. These findings may have implications for timely treatment, regardless of health status.

**Article summary***Strengths and limitations of this study:*

- Our study is one of the first to use several measures of time varying depressive symptoms to show that depression confers a proximal risk for mortality, including cancer mortality.
- We are the first to demonstrate that depressive symptoms are an early modifiable risk factor for mortality in those with excellent or very good reported health who may be less likely to be recognized and treated.
- This is a large cohort of nearly 30,000 individuals, allowing for adjustment of multiple covariates that were not included in prior studies.
- Regional specificity may limit generalizability
- We use the short form CES-D, though this has demonstrated good specificity and sensitivity in prior literature.

## Introduction

It is well known that elevated depressive symptoms predict all-cause mortality,<sup>1</sup> both in high-risk individuals with chronic illnesses like cardiovascular disease (CVD), and in general populations.<sup>2-4 5,6</sup> More recently, several studies have shown that depressive symptoms both preceding and following cancer diagnosis may confer an increased risk of cancer death as well.<sup>7,8</sup>

However, depressive symptoms relapse and remit, and prior studies on the relationship between depressive symptoms and mortality have been limited by one measurement of depressive symptoms.<sup>1</sup> In addition, prior literature has often been marked by inadequate adjustment for important covariates, such as behavioral risk factors. To our knowledge, few if any prior studies have examined the time varying association between depressive symptoms and excess causes of death. In addition, self-perceived health status may predict mortality<sup>9</sup> and complicate the relationship between depressive symptoms and poor outcomes.<sup>10</sup> It is unknown whether depressive symptoms confer an increased risk of excess mortality equally in those with self-reported excellent/very good (in whom depression may be less likely to be recognized) and good/fair/poor health.

The purpose of our study is to examine the association between time varying depressive symptoms with cancer, CVD, nonCVD and all-cause mortality in the Reasons for Geographic and Racial Differences in Stroke (REGARDS) study, a broad, diverse population cohort with repeat measurements of depressive symptoms. We stratify by self-reported baseline health status (very good or excellent vs. poor, fair or good) to further isolate the association between depressive symptoms and excess mortality.

## Methods

The REGARDS study is a national cohort study of stroke incidence and cognitive decline in black and white community dwelling adults  $\geq 45$  years living in the United States stratified to reflect specific race-sex-geographic strata.<sup>11</sup> Coronary heart disease (CHD) outcomes are ascertained from a REGARDS-MI ancillary study. Participants were recruited by mail using commercially available lists of U.S. residents, followed by a computer-assisted telephone interview and subsequent home visit at which time individuals were consented and enrolled. Between January 2003 and October 2007, 30,239 black and white adults were enrolled. Of these, 489 (1.6%) were lost to follow up and 208 (0.7%) were missing baseline depressive symptom measurements (**Figure 1**). The REGARDS study protocol was approved by institutional review boards at participating centers.

### *Study Procedures*

Baseline data were collected through computer-assisted telephone interviews, an in-home examination, and self-administered questionnaires. Trained research staff conducted telephone interviews to collect demographic data, medical history and behavioral risk factors. Following the telephone interview, individuals had an in-home visit during which physical measurements, a resting electrocardiogram, medication inventory, phlebotomy and urine were collected.

### *Primary Outcomes*

The primary outcomes for these analyses were (1) cancer mortality (all body sites) (2) CVD death defined as death from CHD, stroke, heart failure, sudden cardiac death, vascular pathology, and other CVD causes (3) non-CVD death and (4) all-cause mortality. Living participants or their proxies were followed up every 6 months by telephone with retrieval of medical records for

1 reported hospitalizations or physician visits. Deaths were detected by report of next-of-kin or  
2 through online services (e.g., Social Security Death Index) or the National Death Index.<sup>11</sup> Death  
3 certificates, medical records, and autopsy reports were obtained to adjudicate cause of death and  
4 CVD outcomes.  
5  
6  
7  
8  
9

### 10 11 12 *Depressive symptoms*

13  
14 The primary predictor was baseline depressive symptoms. The 4-item Center for Epidemiologic  
15 Studies Depression (CES-D) scale was used to assess the presence of depressive symptoms. This  
16 scale asks participants to rate the number of days over the last week in which they had: 1) felt  
17 depressed; 2) felt lonely; 3) had crying spells; and 4) felt sad. Response options included <1 day,  
18 1 to 2 days, 3 to 4 days, and 5-7 days (0, 1, 2 3 points, respectively). Cronbach's  $\alpha$  for the CES-D  
19 in the total sample was 0.80. Elevated depressive symptoms were defined as a summed score of  
20  $\geq 4$ .<sup>12</sup> The reliability and validity of the CES-D 4 is similar to the original 20-item instrument.<sup>13</sup>  
21  
22  
23  
24  
25  
26  
27  
28  
29  
30  
31  
32

### 33 *Covariates*

34 Demographic data included self-reported age, gender, race (black or white), education (less than  
35 high school, high school graduate, some college, and college graduate and above), annual  
36 income (less than \$20,000, \$20,000-\$34,999, \$35,000-\$74,999, \$75,000 and above), insurance  
37 status (yes/no), and stroke region (including the 'stroke belt' and 'stroke buckle'). Clinical risk  
38 factors included (1) diabetes defined as fasting blood glucose  $\geq 126$  or random glucose  $> 200$   
39 mL/dL or oral hypoglycemic or insulin use, (2) systolic and diastolic blood pressures based on  
40 the average of two standardized blood pressure measurements (in mm Hg) (3) body mass index  
41 (BMI) based on measured height and weight (4) albumin-to-creatinine ratio (ACR)  
42 (logarithmically-transformed), (5) high-density lipoprotein (HDL)-cholesterol, (6) total  
43  
44  
45  
46  
47  
48  
49  
50  
51  
52  
53  
54  
55  
56  
57  
58  
59  
60



1 cholesterol, (7) history of CVD: coronary heart disease (self report history of myocardial  
2 infarction or coronary revascularization procedure or evidence of myocardial infarction on the  
3 study electrocardiogram), self-reported stroke, peripheral vascular disease, or aneurysm, (8)  
4 cognitive impairment on the 6-item screener of global cognitive function<sup>14,15</sup> (9) chronic lung  
5 disease defined as use of beta-2 adrenergic agonists, leukotriene inhibitors, inhaled  
6 corticosteroids, combination inhalers, or other pulmonary medications such as ipratropium,  
7 cromolyn, aminophylline and theophylline. We also assessed self-reported (yes/no) aspirin,  
8 antidepressant (serotonin and norepinephrine reuptake inhibitors, selective serotonin reuptake  
9 inhibitors, tricyclic antidepressants), statin, and antihypertensive use. Behavioral risk factors  
10 included (1) self-reported pack-years of cigarette smoking; (2) physical activity (“How many  
11 times per week do you engage in intense physical activity, enough to work up a sweat?” with  
12 response options of “none”, “1-3 times per week” and “4 or more times per week”); (3) alcohol  
13 use (“How many alcoholic beverages do you drink?": none, moderate [1 drink per day for  
14 women or 2 drinks per day for men], and heavy [greater than 1 drink per day for women and 2  
15 drinks per day for men]);<sup>11</sup> (4) medication non-adherence assessed with the 4-item Morisky  
16 Medication Adherence Scale ( $\geq 1$ ).<sup>16</sup> Potential physiologic risk factors included high-sensitivity  
17 C-reactive protein, self-reported health status based on the physical component of the 12-item  
18 Short-Form Health Survey (SF 12),<sup>17</sup> and perceived stress, measured by the 4-item version of the  
19 Perceived Stress Scale (score of  $\geq 5$  vs.  $<5$ ).<sup>18</sup>

### 20 *Statistical Analyses*

21 Baseline characteristics of participants with and without elevated depressive symptoms at  
22 baseline were compared using chi-square tests (for categorical variables), Student t tests (for  
23  
24  
25  
26  
27  
28  
29  
30  
31  
32  
33  
34  
35  
36  
37  
38  
39  
40  
41  
42  
43  
44  
45  
46  
47  
48  
49  
50  
51  
52  
53  
54  
55  
56  
57  
58  
59  
60

1 continuous variables), and Wilcoxon rank sum tests (for non-normally distributed continuous  
2 measures).  
3  
4  
5  
6  
7

8 Cox proportional hazard regression models were constructed to separately analyze the  
9 association between time varying depressive symptoms (CES-D $\geq$ 4) and mortality from cancer  
10 (from all body sites, a subset of nonCVD death), CVD death, nonCVD death and all-cause. The  
11 end date of follow-up for this analysis was December 31, 2012. Depressive symptoms were  
12 measured on the CES-D scale: 1) at baseline (initial telephone call) 2) on average five years after  
13 baseline measurement, and 3) on average two years after the second measurement. In the  
14 analyses, we considered depressive symptoms (CES-D $\geq$ 4 vs. <4) as a time-varying exposure,  
15 with updates of exposure at 5-year and 7-year follow-up. Therefore each participant contributed  
16 up to 3 measures of CES-D ( $\geq$ 4 vs. <4) over the follow-up. Follow-up time for each participant  
17 was calculated from the date of the in-home visit to the date of the earliest of: death, last  
18 telephone follow-up, end of follow-up or next CES-D. CES-D scores measured after the end of  
19 follow-up were not eligible for inclusion in the time-varying analysis. We additionally  
20 graphically plotted unadjusted cumulative incidence of mortality endpoints over follow-up for  
21 participants with elevated vs. nonelevated time-varying depressive symptoms using Kaplan-  
22 Meier curves.  
23  
24  
25  
26  
27  
28  
29  
30  
31  
32  
33  
34  
35  
36  
37  
38  
39  
40  
41  
42  
43

44 Unadjusted hazard ratios and 95% confidence intervals (CI) of mortality endpoints were  
45 estimated for those with vs. without elevated depressive symptoms. Adjusted modeling  
46 proceeded in stages, starting with demographic (Model 1) and traditional CVDrisk factors  
47 (Model 2) assessed in prior trials. We then added behavioral (Model 3) and other potential  
48 explanatory (Model 4) factors. We also conducted a formal test for interaction between  
49  
50  
51  
52  
53  
54  
55  
56  
57  
58  
59  
60

1 depressive symptoms and self-reported health (defined as excellent or very good vs. good, fair or  
2 poor health) in the fully-adjusted models. As such, all analyses were conducted overall as well as  
3 stratified by baseline self-reported health.  
4  
5  
6  
7  
8  
9

### 10 *Sensitivity Analyses*

11 Sensitivity analyses constructed in parallel to the main analyses examined association of baseline  
12 CES-D measure with mortality endpoints in the sequentially-adjusted Cox proportional hazard  
13 regression models. The end date of follow-up for this analysis was December 31, 2012. Follow-  
14 up time for each participant was calculated from the date of the in-home visit to the date of the  
15 earliest of: death, last telephone follow-up, or end of follow-up.  
16  
17  
18  
19  
20  
21  
22  
23  
24  
25

26 Missing data in covariates were imputed using chained equations and derived by bootstrapping  
27 across the 5 imputed datasets. Analyses were conducted using SAS software version 9.4 (SAS  
28 Institute, Cary, NC) and STATA version 12 (STATA incorporated, College Station, TX).  
29  
30  
31  
32  
33

## 34 **Results**

### 35 *Participant Characteristics*

36 Overall, 1.6% were lost to follow up and 0.7% were missing baseline depressive symptoms,  
37 leaving 29,491 eligible participants (**Figure 1**) of whom 3,254 (11.0%) had elevated depressive  
38 symptoms at baseline (CES-D $\geq$ 4). The average age was 64.9 (9.4) years; 55.1% were female and  
39 41.1% were black, 22.0% had diabetes, 9.2% chronic lung disease and 23.1% CVD. Nearly 33%  
40 of individuals were physically inactive, 29.2% non-adherent to their medication regimen and  
41 14.5% current smokers. A total of 53.5% of participants self-reported their general health to be  
42 poor, fair, or good compared to 46.5% who reported their health to be excellent or very good, of  
43 whom 16.0% and 5.3% had elevated depressive symptoms, respectively (eTable 1). Regardless  
44  
45  
46  
47  
48  
49  
50  
51  
52  
53  
54  
55  
56  
57  
58  
59  
60

1 of health status, participants with elevated (vs. non-elevated) depressive symptoms were more  
2 likely to be female, African-American, low income, have more chronic diseases, low physical  
3 health, and more behavioral risk factors (**Table 1A-B**).

### 4 *Mortality*

5 A total of 4,581 (15.5%) participants died during the follow up period ending in 2012. Of these,  
6 1,551 (33.9%) were attributed to CVD and 3,030 (66.1%) to nonCVD disease death. Of nonCVD  
7 deaths, 1,226 (44.3%) were due to cancer death (eTable 2). Overall, there were only 3 cases of  
8 mortality due to suicide.

9  
10 For the time-varying analyses, depressive symptoms were measured at baseline and on average  
11 4.8 years (SD = 1.5) years following the baseline measurement, the third measurement occurring  
12 on average 2.1 (SD = 0.4) years after the second measurement (eFigure 1). The mean follow-up  
13 time of the second and third measurement of CES-D measures did not differ by self-reported  
14 health (eFigure 2). Of the participants with elevated depressive symptoms at baseline, 39.9% and  
15 36.8% had elevated depressive symptoms at the second and third measures, respectively (eTable  
16 3). Time-varying depressive symptoms significantly predicted nonCVD disease death (aHR 1.29,  
17 95% CI 1.16-1.44) and all-cause mortality (aHR 1.24, 95% CI 1.14-1.36), while approaching  
18 significance for cancer death (aHR 1.15, 95% CI 0.96-1.38) and CVD death (aHR 1.13, 95% CI  
19 0.98-1.32), even after adjusting for demographic, clinical, behavioral physiologic factors and  
20 time-varying non-fatal CVD events (**Table 2, Figure 2**). The results appeared to be particularly  
21 robust amongst those with excellent or very good self-reported general health (**Table 2**): all-  
22 cause (aHR=1.48, 95%CI 1.27-1.78), CVD (aHR=1.37, 95%CI 0.99-1.91), nonCVD (aHR=1.54,  
23 95%CI 1.24-1.92) and cancer (aHR=1.36 95% 0.97-1.91) death. In Model 4, the p-values for the  
24  
25  
26  
27  
28  
29  
30  
31  
32  
33  
34  
35  
36  
37  
38  
39  
40  
41  
42  
43  
44  
45  
46  
47  
48  
49  
50  
51  
52  
53  
54  
55  
56  
57  
58  
59  
60

1 depressive symptoms x health status interaction term were 0.005 (all-cause mortality), 0.06  
2  
3 (CVD death), 0.03 (nonCVD death), and 0.20 (cancer death).  
4  
5  
6  
7

### 8 *Sensitivity Analyses:*

9  
10 The mean follow-up time was 6.5 (SD = 2.3) years. Baseline depressive symptoms were  
11 significantly associated with all-cause mortality (aHR 1.18, 95%CI 1.07-1.29) and nonCVD  
12 death (aHR 1.21, 95%CI 1.08-1.36) and approached significance for CVD death (aHR 1.10,  
13 95%CI 0.94-1.29) and cancer death (aHR 1.12, 95%CI 0.93-1.36), even in the exploratory  
14 models (Model 3) (**Table 3**). The results appeared to be particularly robust amongst those with  
15 excellent or very good health: cancer death (aHR 1.49, 95%CI 1.03-2.13), CVD death (aHR  
16 1.63, 95%CI 1.16-2.30), nonCVD death (aHR 1.48, 95%CI 1.15-1.89) and all-cause mortality  
17 (aHR 1.53, 95% CI 1.25-1.88). In Model 4, the p values for depressive symptoms x health status  
18 interaction term was 0.003 (all cause mortality), 0.01 (CVD death), 0.06 (nonCVD death), and  
19 0.07 (cancer death).  
20  
21  
22  
23  
24  
25  
26  
27  
28  
29  
30  
31  
32  
33  
34

### 35 **Discussion**

36  
37 To our knowledge, this is the largest study to date to examine the timing of the relationship  
38 between depressive symptoms and all-cause and cause-specific mortality in non-institutionalized  
39 middle to older aged adults. In this diverse cohort with an average follow up of 6.5 years, we  
40 found that time-varying depressive symptoms significantly increased the risk of nonCVD and  
41 all-cause mortality in fully adjusted models. In fully adjusted models, depressive symptoms  
42 increased the risk of cause-specific and all-cause mortality by 36% to 54% in those with a very  
43 good/excellent state of health.  
44  
45  
46  
47  
48  
49  
50  
51  
52  
53  
54  
55  
56  
57  
58  
59  
60

1 Given that depression is a relapsing/remitting disease,<sup>19</sup> this study markedly adds to the literature  
2  
3 by demonstrating a short-term relationship between elevated depressive symptoms and mortality,  
4  
5 including cancer death. Major study strengths include the use 3 measurements of depressive  
6  
7 symptoms and stringent physician adjudication outcomes. We are also the first to report a  
8  
9 significant moderating effect of self-reported health on the relationship between depressive  
10  
11 symptoms and mortality. Many have long asked whether depression leads to mortality or  
12  
13 whether individuals are depressed because they are dying. Our findings in those who report  
14  
15 excellent states of health is striking and supports the former argument. It may also be that the  
16  
17 effect of chronic illness burden on mortality in those with poor health overwhelms the effects of  
18  
19 depressive symptoms. Those with excellent health may also fail to recognize/present for  
20  
21 depression. In fact, our depressed excellent health individuals were less likely to be on an  
22  
23 antidepressant.  
24  
25  
26  
27  
28  
29  
30

31 The results have a coherence consistent with prior studies that suggest that depressive symptoms  
32  
33 don't solely predict suicide and CVD mortality, but also predict other causes such as cancer  
34  
35 death.<sup>20</sup> While prior literature suggests that depressive symptoms confer mortality in those with  
36  
37 active cancer,<sup>21</sup> our study excluded active cancer diagnoses confirming a possible relationship to  
38  
39 incident cancer mortality. Prior studies have also been limited by inadequate covariate control,  
40  
41 and our results for cancer persisted after adjusting for numerous traditional and behavioral risk  
42  
43 factors, such as smoking, and approached significance even in models that included physiologic  
44  
45 factors. We were however, unable to adjust for time varying covariates. It may be that changes in  
46  
47 physical health (e.g., number of debilitating conditions) may mediate the relationship between  
48  
49 depressive symptoms and mortality.<sup>22</sup>  
50  
51  
52  
53  
54  
55  
56  
57  
58  
59  
60

1 This study also supports comprehensive evidence-based depression care management in primary  
2 care practices, which have been shown to lower mortality risk.<sup>23</sup> Nonetheless, depression  
3 treatment remains suboptimal in the general population,<sup>24</sup> despite decades of efforts. We too  
4 demonstrate that over time, nearly 40% of patients with elevated depressive symptoms at  
5 baseline were still depressed on average 5 and 7 years later. Given the potentially short-term  
6 relationship between depressive symptoms and mortality, our results suggest the importance of  
7 timely and effective treatment of depressive symptoms to prevent adverse consequences of  
8 depressive symptoms on physical health and mortality.  
9

10 Limitations of our study include the regional specificity, limiting generalizability, and use of the  
11 short form of the CES-D, which measures only emotional and not somatic symptoms of  
12 depression. However, CES-D scales are one of the most widely used scales in baseline  
13 depression to outcome studies (the results of which do not appear to differ according to clinical  
14 diagnosis vs. use of continuous scales) and have good sensitivity and specificity.<sup>7,12,13</sup> We may  
15 also have been underpowered to examine CVD and cancer mortality, though the directionality of  
16 the estimates remained consistent. The exclusion of active/treated cancer participants, unlike  
17 prior studies, may also have contributed to lack of power. We were unable to adjust for family  
18 history of malignancy or CVD or definitively exclude subclinical disease.  
19

20 Give our results of a relationship between time varying depressive symptoms and mortality,  
21 further research is warranted to test the long-term efficacy of and adherence to depression  
22 treatment and to explore preventive approaches to decreasing premature mortality risk.<sup>25</sup> To our  
23 knowledge, the finding of a relationship between depressive symptoms and mortality in those  
24 with excellent or very good self-reported health is a new finding and should be further studied.  
25  
26  
27  
28  
29  
30  
31  
32  
33  
34  
35  
36  
37  
38  
39  
40  
41  
42  
43  
44  
45  
46  
47  
48  
49  
50  
51  
52  
53  
54  
55  
56  
57  
58  
59  
60

## References

1. Wulsin LR, Vaillant GE, Wells VE. A systematic review of the mortality of depression. *Psychosom Med.* 1999;61:6-17.
2. Sullivan MD, O'Connor P, Feeney P, et al. Depression Predicts All-Cause Mortality: Epidemiological evaluation from the ACCORD HRQL substudy. *Diabetes Care.* 2012;35:1708-1715.
3. Review: depression after myocardial infarction is associated with increased risk of all-cause mortality and cardiovascular events. *Evidence Based Mental Health.* 2013;16:110.
4. Barth J, Schumacher M, Herrmann-Lingen C. Depression as a risk factor for mortality in patients with coronary heart disease: a meta-analysis. *Psychosom Med.* 2004;66:802-813.
5. Cuijpers P, Vogelzangs N, Twisk J, et al. Comprehensive meta-analysis of excess mortality in depression in the general community versus patients with specific illnesses. *Am J Psychiatry.* 2014;171:453-462.
6. Cuijpers P, Smit F. Excess mortality in depression: a meta-analysis of community studies. *J Affect Disord.* 72:227-236.
7. Pinquart M, Duberstein PR. Depression and cancer mortality: a meta-analysis. *Psychological medicine.* 2010;40:1797-1810.
8. Mols F, Husson O, Roukema JA, van de Poll-Franse LV. Depressive symptoms are a risk factor for all-cause mortality: results from a prospective population-based study among 3,080 cancer survivors from the PROFILES registry. *J Cancer Surviv.* 2013;7:484-492.
9. McGee DL, Liao Y, Cao G, Cooper RS. Self-reported Health Status and Mortality in a Multiethnic US Cohort. *Am J Epidemiol.* 1999;149:41-46.
10. Ambresin G, Chondros P, Dowrick C, Herrman H, Gunn JM. Self-Rated Health and Long-Term Prognosis of Depression. *Annals of Family Medicine.* 2014;12:57-65.



- 1 **11.** Howard VJ, Cushman M, Pulley L, et al. The reasons for geographic and racial  
2 differences in stroke study: objectives and design. *Neuroepidemiology*. 2005;25:135-143.
- 3  
4  
5 **12.** Melchior LA, Huba GJ, Brown VB, Reback CJ. A Short Depression Index for Women.  
6  
7 *Educational and Psychological Measurement*. 1993;53:1117-1125.
- 8  
9  
10 **13.** Radloff LS. The ces-d scale: A self-report depression scale for research in the general  
11  
12 population. . *Appl Psychol Meas*. 1977;1:385-401.
- 13  
14  
15 **14.** Folstein MF, Folstein SE, McHugh PR. "Mini-mental state". A practical method for  
16  
17 grading the cognitive state of patients for the clinician. *J Psychiatr Res*. 1975;12:189-198.
- 18  
19  
20 **15.** Callahan CM, Unverzagt FW, Hui SL, Perkins AJ, Hendrie HC. Six-item screener to  
21  
22 identify cognitive impairment among potential subjects for clinical research. *Med Care*.  
23  
24 2002;40:771-781.
- 25  
26  
27 **16.** Morisky DE, Green LW, Levine DM. Concurrent and predictive validity of a self-  
28  
29 reported measure of medication adherence. *Med Care*. 1986;24:67-74.
- 30  
31  
32 **17.** Ware J, Jr., Kosinski M, Keller SD. A 12-Item Short-Form Health Survey: construction  
33  
34 of scales and preliminary tests of reliability and validity. *Med Care*. 1996;34:220-233.
- 35  
36  
37 **18.** Cohen S, Kamarck T, Mermelstein R. A global measure of perceived stress. *J Health Soc*  
38  
39 *Behav*. 1983;24:385-396.
- 40  
41  
42 **19.** Lin EH, Katon WJ, VonKorff M, et al. Relapse of depression in primary care. Rate and  
43  
44 clinical predictors. *Arch Fam Med*. 1998;7:443-449.
- 45  
46  
47 **20.** Mykletun A, Bjerkeset O, Dewey M, et al. Anxiety, depression, and cause-specific  
48  
49 mortality: the HUNT study. *Psychosom Med*. 2007;69:323-331.
- 50  
51  
52 **21.** Satin JR, Linden W, Phillips MJ. Depression as a predictor of disease progression and  
53  
54 mortality in cancer patients: a meta-analysis. *Cancer*. 2009;115:5349-5361.
- 55  
56  
57  
58  
59  
60

- 1       **22.**   Houle JN. Depressive symptoms and all-cause mortality in a nationally representative  
2  
3       longitudinal study with time-varying covariates. *Psychosom Med.* 2013;75:297-304.  
4
- 5       **23.**   Gallo JJ, Morales KH, Bogner HR, et al. Long term effect of depression care  
6  
7       management on mortality in older adults: follow-up of cluster randomized clinical trial in  
8  
9       primary care. *BMJ.* 2013;346:f2570.  
10
- 11       **24.**   González HM, Vega WA, Williams DR, et al. Depression care in the united states: Too  
12  
13       little for too few. *Arch Gen Psychiatry.* 2010;67:37-46.  
14
- 15       **25.**   Kuyken W, Warren FC, Taylor RS, et al. Efficacy of Mindfulness-Based Cognitive  
16  
17       Therapy in Prevention of Depressive Relapse: An Individual Patient Data Meta-analysis  
18  
19       From Randomized Trials. *JAMA Psychiatry.* 2016;73:565-574.  
20  
21  
22  
23  
24  
25  
26  
27  
28  
29  
30  
31  
32  
33  
34  
35  
36  
37  
38  
39  
40  
41  
42  
43  
44  
45  
46  
47  
48  
49  
50  
51  
52  
53  
54  
55  
56  
57  
58  
59  
60

## ACKNOWLEDGEMENTS

**Funding:** This research project is supported by a cooperative agreement U01 NS041588 from the National Institute of Neurological Disorders and Stroke, National Institutes of Health, Department of Health and Human Service. The REGARDS study was supported by NIH grant 2U01NS041588; REGARDS-MI study was supported by NIH grants R01 HL080477 and K24 HL111154. The content is solely the responsibility of the authors and does not necessarily represent the official views of the National Institute of Neurological Disorders and Stroke or the National Institutes of Health. Representatives of the funding agency have been involved in the review of the manuscript but not directly involved in the collection, management, analysis, or interpretation of the data. The authors thank the other investigators, the staff, and the participants of the REGARDS study for their valuable contributions. A full list of participating REGARDS investigators and institutions can be found at <http://www.regardsstudy.org>. This work was also supported by funds from NHLBI (3 R01 HL114924-03S1; HL080477; and K24 HL111154).

**Disclosures:** All authors have completed the ICMJE uniform disclosure form at [www.icmje.org/coi\\_disclosure.pdf](http://www.icmje.org/coi_disclosure.pdf) and declare: no support from any organisation for the submitted work; no financial relationships with any organisations that might have an interest in the submitted work in the previous three years; no other relationships or activities that could appear to have influenced the submitted work.

**Author Contributions:** Drs. Yulia Khodneva and Joshua Richman had full access to all the data in the study and take responsibility for the integrity of the data and the accuracy of the data analysis.

*Study concept and design:* Moise, Khodneva, Safford; *Acquisition of data:* Khodneva, Safford;

*Analysis and interpretation of data:* Khodneva, Moise, Richman, Kronish, Shaffer, Safford;

*Drafting of the manuscript:* Moise, Khodneva *Critical revision of manuscript for important*

1 *intellectual content:* Moise, Khodneva, Richman, Kronish, Davidson, Shaffer, Safford;

2  
3 *Statistical analysis:* Khodneva; *Obtained funding:* Safford; *Study supervision:* Safford

4  
5 **Conflict of Interest:** None

6  
7  
8  
9 **Copyright:** The Corresponding Author has the right to grant on behalf of all authors and does  
10 grant on behalf of all authors, a worldwide licence to the Publishers and its licensees in  
11 perpetuity, in all forms, formats and media (whether known now or created in the future), to i)  
12 publish, reproduce, distribute, display and store the Contribution, ii) translate the Contribution  
13 into other languages, create adaptations, reprints, include within collections and create  
14 summaries, extracts and/or, abstracts of the Contribution, iii) create any other derivative work(s)  
15 based on the Contribution, iv) to exploit all subsidiary rights in the Contribution, v) the inclusion  
16 of electronic links from the Contribution to third party material where-ever it may be located;  
17 and, vi) licence any third party to do any or all of the above.

18  
19  
20  
21  
22  
23  
24  
25  
26  
27  
28  
29 **Transparency:** Dr. Moise affirms that the manuscript is an honest, accurate, and transparent  
30 account of the study being reported; that no important aspects of the study have been omitted;  
31 and that any discrepancies from the study as planned (and, if relevant, registered) have been  
32 explained.

33  
34  
35  
36  
37  
38  
39 **Data Sharing:** Patient level data or full dataset or technical appendix or statistical code are  
40 available if deemed important by reviewers with open access by Monika Safford at Weill  
41 Cornell, Nathalie Moise at Columbia University Medical Center, and Yulia Khodneva at  
42 University of Alabama at Birmingham. Patient consent was not obtained but the presented data  
43 are anonymised and risk of identification is low.

**What is already known on this subject**

- Prior studies on the relationship between depressive symptoms and all cause mortality thought to be secondary to CVD mortality and increasingly there is a link to cancer mortality
- However, depressive symptoms often relapse and remit, and prior studies have been limited by one measurement of depression, inadequate assessment of the complex role of health status, and inadequate covariate adjustment.

**What this study adds**

- Our study is the first to show that depression confers a proximal risk for mortality, including cancer mortality, particularly in those with excellent or very good reported health.
- Our study suggests that depression is an early modifiable risk factor for mortality, including cancer mortality

**Table 1A. Overall baseline characteristics of REGARDS participants according to baseline depressive symptoms (CES-D)**

| Characteristics                                          | Overall<br>(n=29,491) | CES-D < 4<br>(n=26,817) | CES-D ≥4<br>(n=3,254) | <i>p</i> |
|----------------------------------------------------------|-----------------------|-------------------------|-----------------------|----------|
| <b><i>Socio-demographics</i></b>                         |                       |                         |                       |          |
| Age, <i>M</i> (SD)                                       | 64.9 (9.4)            | 65.1 (9.4)              | 63.2 (9.8)            | <.001    |
| Female, n (%)                                            | 16245 (55.1)          | 13988 (53.3)            | 2257 (69.4)           | <.001    |
| African American, n (%)                                  | 12129 (41.1)          | 10427 (39.7)            | 1702 (52.3)           | <.001    |
| Less than high school education, n (%)                   | 3696 (12.5)           | 2916 (11.1)             | 780 (24.0)            | <.001    |
| Annual household income, n (%)                           |                       |                         |                       |          |
| Less than \$20,000                                       | 5322 (18.0)           | 4148 (15.8)             | 1174 (36.1)           | <.001    |
| No health insurance, n (%)                               | 1926 (6.5)            | 1532 (5.8)              | 394 (12.1)            | <.001    |
| Region, n (%)                                            |                       |                         |                       | <.001    |
| Stroke belt <sup>a</sup>                                 | 10193 (34.6)          | 8973 (34.2)             | 1220 (37.5)           |          |
| Stroke buckle <sup>b</sup>                               | 6188 (21.0)           | 5437 (20.7)             | 751 (23.1)            |          |
| Non-stroke belt or buckle                                | 13110 (44.5)          | 11827 (45.1)            | 1283 (39.4)           |          |
| <b><i>General health and medical conditions</i></b>      |                       |                         |                       |          |
| Self-reported general health, n (%)                      |                       |                         |                       | <.001    |
| Poor, fair, good                                         | 15742 (53.5)          | 13219 (50.5)            | 2523 (77.7)           |          |
| Excellent, very good                                     | 13690 (46.5)          | 12965 (49.5)            | 725 (22.3)            |          |
| Cardiovascular disease, n (%) <sup>c</sup>               | 6825 (23.1)           | 5838 (22.3)             | 987 (30.3)            | <.001    |
| Diabetes, n (%) <sup>d</sup>                             | 6252 (22.0)           | 5305 (21.0)             | 947 (30.2)            | <.001    |
| COPD, n (%)                                              | 2710 (9.2)            | 2307 (8.8)              | 403 (12.4)            | <.001    |
| Physical component score on SF-12 scale, <i>M</i> (SD)   | 46.4 (10.6)           | 47.1 (10.2)             | 40.7 (12.2)           | <.001    |
| <b><i>Physiological risk factors</i></b>                 |                       |                         |                       |          |
| Body Mass Index, kg/m <sup>2</sup> , <i>M</i> (SD)       | 29.3 (6.2)            | 29.2 (6.1)              | 30.6 (7.1)            | <.001    |
| Systolic Blood Pressure, mmHg, <i>M</i> (SD)             | 127.6 (16.7)          | 127.5 (16.5)            | 128.7 (18.1)          | <.001    |
| Total Cholesterol, mg/dL, <i>M</i> (SD)                  | 192.1 (40.1)          | 191.7 (39.8)            | 194.6 (43.0)          | <0.001   |
| High-Density Lipoprotein, mg/dL, <i>M</i> (SD)           | 51.8 (16.2)           | 51.7 (16.2)             | 52.5 (16.3)           | 0.02     |
| QT Interval, corrected for heart rate, ms, <i>M</i> (SD) | 407.5 (23.6)          | 407.2 (23.5)            | 410.0 (24.1)          | <.001    |
| High-Sensitivity C-Reactive Protein, mg/L, median, IQR   | 2.2[1.0-5.0]          | 2.1[0.9-4.8]            | 3.0[1.2-6.9]          | <.001    |
| Albumin to Creatinine Ratio, mg/g, median, IQR           | 7.4[4.7-6.2]          | 7.3[4.6-15.8]           | 8.2[5.1-19.8]         | <.001    |
| <b><i>Medications</i></b>                                |                       |                         |                       |          |
| Antihypertensive medication use, n (%)                   | 15197 (52.1)          | 13290 (51.2)            | 1907 (59.4)           | <.001    |
| Statin use, n (%)                                        | 9295 (31.6)           | 8248 (31.5)             | 1047 (32.3)           | 0.38     |

|    |                                             |              |              |              |        |
|----|---------------------------------------------|--------------|--------------|--------------|--------|
| 1  | Aspirin use, n (%)                          | 12790 (43.4) | 11376 (43.4) | 1414 (43.5)  | 0.91   |
| 2  |                                             |              |              |              |        |
| 3  | Antidepressant use, n (%)                   | 4086 (13.9)  | 3164 (12.1)  | 922 (28.4)   | <.001  |
| 4  | <b>Behavioral risk factors</b>              |              |              |              |        |
| 5  | Self-reported smoking, pack years, <i>M</i> |              |              |              |        |
| 6  | (SD)                                        | 13.5 ( 23.1) | 13.3 ( 22.8) | 15.5 ( 24.9) | <.001  |
| 7  |                                             |              |              |              |        |
| 8  | Current Smoking, n(%)                       | 4263(14.5)   | 3463(13.3)   | 800(24.7)    | <.001  |
| 9  |                                             |              |              |              |        |
| 10 | Alcohol use, n (%)                          |              |              |              | <.001  |
| 11 | Heavy                                       | 1172 (4.1)   | 1043 (4.0)   | 129 (4.1)    |        |
| 12 | Moderate                                    | 9626 (33.3)  | 8786 (34.1)  | 840 (26.6)   |        |
| 13 | None                                        | 18116 (62.7) | 15925 (61.8) | 2191 (69.3)  |        |
| 14 | Physical inactivity, n (%)                  | 10004 (34.4) | 8500 (32.9)  | 1504 (46.9)  | <0.001 |
| 15 |                                             |              |              |              |        |
| 16 | Medication non-adherence, n (%)             | 7959 (29.7)  | 6820 (28.7)  | 1139 (37.8)  | <.001  |
| 17 |                                             |              |              |              |        |
| 18 | Impaired cognitive status                   | 1888 (7.9)   |              |              |        |
| 19 | (Cognitive score $\leq$ 4)                  |              | 1542 (7.3)   | 346 (12.6)   | <.001  |
| 20 | Elevated perceived stress (PSS $\geq$ 5)    | 8591 (29.1)  | 6283 (23.9)  | 2308 (70.9)  | <.001  |

1  
2  
3  
4  
5  
6  
7  
8  
9  
10  
11  
12  
13  
14  
15  
16  
17  
18  
19  
20  
21  
22  
23  
24  
25  
26  
27  
28  
29  
30  
31  
32  
33  
34  
35  
36  
37  
38  
39  
40  
41  
42  
43  
44  
45  
46  
47  
48  
49  
50  
51  
52  
53  
54  
55  
56  
57  
58  
59  
60

For peer review only



**Table 1B. Baseline characteristics of REGARDS participants according to baseline depressive symptoms (CES-D) and self-reported health**

| Characteristics                                          | Self-reported general health as<br>"excellent or very good" |                     |          | Self-reported general health as<br>"poor, fair or good" |                      |          |
|----------------------------------------------------------|-------------------------------------------------------------|---------------------|----------|---------------------------------------------------------|----------------------|----------|
|                                                          | CES-D < 4<br>(n=12965)                                      | CES-D ≥4<br>(n=725) | <i>p</i> | CES-D < 4<br>(n=13219)                                  | CES-D ≥4<br>(n=2523) | <i>p</i> |
| <b>Socio-demographics</b>                                |                                                             |                     |          |                                                         |                      |          |
| Age, <i>M</i> (SD)                                       | 64.8 (9.4)                                                  | 64.5 (10.2)         | 0.47     | 65.5 (9.3)                                              | 62.8 (9.6)           | <.001    |
| Female, n (%)                                            | 6600 (50.9)                                                 | 501 (69.1)          | <.001    | 7357 (55.7)                                             | 1751 (69.4)          | <.001    |
| African American, n (%)                                  | 3726 (28.7)                                                 | 295 (40.7)          | <.001    | 6677 (50.5)                                             | 1404 (55.6)          | <.001    |
| Less than high school education, n (%)                   | 845 (6.5)                                                   | 119 (16.4)          | <.001    | 2059 (15.6)                                             | 658 (26.1)           | <.001    |
| Annual household income, n (%)                           |                                                             |                     |          |                                                         |                      |          |
| Less than \$20,000                                       | 1304 (10.1)                                                 | 190 (26.2)          | <.001    | 2832 (21.4)                                             | 983 (39.0)           | <.001    |
| No health insurance, n (%)                               | 644 (5.0)                                                   | 70 (9.7)            | <.001    | 884 (6.7)                                               | 324 (12.9)           | <.001    |
| Region, n (%)                                            |                                                             |                     | 0.37     |                                                         |                      | <.001    |
| Stroke belt <sup>a</sup>                                 | 4282 (33.0)                                                 | 256 (35.3)          |          | 4668 (35.3)                                             | 963 (38.2)           |          |
| Stroke buckle <sup>b</sup>                               | 2619 (20.2)                                                 | 148 (20.4)          |          | 2807 (21.2)                                             | 601 (23.8)           |          |
| Non-stroke belt or buckle                                | 6064 (46.8)                                                 | 321 (44.3)          |          | 5744 (43.5)                                             | 959 (38.0)           |          |
| <b>General health and medical conditions</b>             |                                                             |                     |          |                                                         |                      |          |
| Self-reported general health, n (%)                      |                                                             |                     |          |                                                         |                      |          |
| Poor, fair, good                                         | --                                                          | --                  |          | ---                                                     | --                   |          |
| Excellent, very good                                     | --                                                          | --                  |          | ---                                                     | ---                  |          |
| Cardiovascular disease, n (%) <sup>c</sup>               | 1948 (15.0)                                                 | 144 (19.9)          | 0.004    | 3874 (29.3)                                             | 840 (33.3)           | <.001    |
| Diabetes, n (%) <sup>d</sup>                             | 1443 (11.6)                                                 | 93 (13.3)           | 0.16     | 3840 (30.2)                                             | 853 (35.1)           | <.001    |
| COPD, n (%)                                              | 796 (6.2)                                                   | 55 (7.6)            | 0.11     | 1507 (11.4)                                             | 347 (13.8)           | 0.007    |
| Physical component score on SF-12 scale, <i>M</i> (SD)   | 52.0 (6.5)                                                  | 51.3 (9.1)          | 0.008    | 42.0 (10.7)                                             | 37.7 (11.3)          | <.001    |
| <b>Physiological risk factors</b>                        |                                                             |                     |          |                                                         |                      |          |
| Body Mass Index, kg/m <sup>2</sup> , <i>M</i> (SD)       | 27.8 (5.1)                                                  | 28.4 (5.7)          | 0.006    | 30.5 (6.6)                                              | 31.2 (7.3)           | <.001    |
| Systolic Blood Pressure, mmHg, <i>M</i> (SD)             | 125.3 (15.7)                                                | 126.0 (17.2)        | 0.27     | 129.6 (16.9)                                            | 129.5 (18.3)         | 0.91     |
| Total Cholesterol, mg/dL, <i>M</i> (SD)                  | 193.8 (38.2)                                                | 195.5 (38.6)        | 0.26     | 189.7 (41.2)                                            | 194.4 (44.2)         | <.001    |
| High-Density Lipoprotein, mg/dL, <i>M</i> (SD)           | 53.1 (16.4)                                                 | 55.8 (16.6)         | <.001    | 50.4 (15.8)                                             | 51.5 (16.1)          | 0.002    |
| QT Interval, corrected for heart rate, ms, <i>M</i> (SD) | 405.6 (22.6)                                                | 407.2 (23.5)        | 0.06     | 408.7 (24.3)                                            | 410.8 (24.2)         | <.001    |
| High-Sensitivity C-Reactive Protein, mg/L, median, IQR   | 1.7[0.8-3.8]                                                | 1.9[0.9-4.9]        | 0.004    | 2.7[1.2-6.1]                                            | 3.4[1.3-7.7]         | <.001    |
| Albumin to Creatinine Ratio, mg/g, median, IQR           | 6.6[4.3-12.3]                                               | 6.9[4.7-14.0]       | 0.005    | 8.4[5.0-20.7]                                           | 8.7[5.1-22.2]        | 0.18     |
| <b>Medications</b>                                       | 4916 (38.3)                                                 | 297 (41.7)          | 0.06     | 8344 (63.9)                                             | 1606 (64.5)          | 0.57     |

|    |                                             |              |              |       |              |              |       |
|----|---------------------------------------------|--------------|--------------|-------|--------------|--------------|-------|
| 1  | Antihypertensive medication use, n (%)      |              |              |       |              |              |       |
| 2  | Statin use, n (%)                           | 3407 (26.4)  | 176 (24.4)   | 0.24  | 4822 (36.5)  | 870 (34.6)   | 0.06  |
| 3  | Aspirin use, n (%)                          | 5254 (40.5)  | 273 (37.7)   | 0.13  | 6100 (46.2)  | 1140 (45.2)  | 0.36  |
| 4  |                                             |              |              |       |              |              | <.001 |
| 5  | Antidepressant use, n (%)                   | 1224 (9.5)   | 144 (19.9)   | <.001 | 1933 (14.6)  | 774 (30.8)   |       |
| 6  | <b>Behavioral risk factors</b>              |              |              |       |              |              |       |
| 7  | Self-reported smoking, pack years, <i>M</i> |              |              |       |              |              |       |
| 8  | (SD)                                        | 11.2 ( 20.5) | 12.1 ( 21.6) | 0.24  | 15.3 ( 24.7) | 16.5 ( 25.6) | 0.03  |
| 9  |                                             |              |              |       |              |              |       |
| 10 | Current Smoking, n(%)                       | 1344 (10.4)  | 114 (15.8)   | <.001 | 2110 (16.0)  | 684 (27.2)   | <.001 |
| 11 |                                             |              |              |       |              |              |       |
| 12 | Alcohol use, n (%)                          |              |              | 0.01  |              |              | <.001 |
| 13 | Heavy                                       | 634 (5.0)    | 38 (5.4)     |       | 409 (3.2)    | 91 (3.7)     |       |
| 14 | Moderate                                    | 5034 (39.4)  | 238 (33.8)   |       | 3746 (29.0)  | 600 (24.5)   |       |
| 15 | None                                        | 7103 (55.6)  | 429 (60.9)   |       | 8779 (67.9)  | 1758 (71.8)  |       |
| 16 | Physical inactivity, n (%)                  | 3107 (24.3)  | 259 (36.0)   | <.001 | 5372 (41.3)  | 1242 (50.0)  | <.001 |
| 17 |                                             |              |              |       |              |              |       |
| 18 | Medication non-adherence, n (%)             | 2997 (26.2)  | 211 (33.1)   | <.001 | 3809 (31.0)  | 926 (39.1)   | <.001 |
| 19 |                                             |              |              |       |              |              |       |
| 20 | Impaired cognitive status                   |              |              | <.001 |              |              | <.001 |
| 21 | (Cognitive score $\leq$ 4)                  | 587 (5.6)    | 61 (10.1)    |       | 947 (8.9)    | 285 (13.3)   |       |
| 22 | Elevated perceived stress (PSS $\geq$ 5)    | 2219 (17.1)  | 404 (55.7)   | <.001 | 4048 (30.6)  | 1900 (75.3)  | <.001 |

**Table 2. Association of time-variant elevated depressive symptoms with mortality outcomes.** Each participant contributes to up to 3 time-variant CES-D measures. End of follow-up December 31, 2012.

|                                                                                                                                                                                                                                                                                                                                                                                                                                                                                                                                                                                              | Overall (N=29,491)     | Self-reported general health as "excellent or very good" n=13,711 | Self-reported general health as "poor, fair or good" n=15,780 |
|----------------------------------------------------------------------------------------------------------------------------------------------------------------------------------------------------------------------------------------------------------------------------------------------------------------------------------------------------------------------------------------------------------------------------------------------------------------------------------------------------------------------------------------------------------------------------------------------|------------------------|-------------------------------------------------------------------|---------------------------------------------------------------|
| <i>HR (95%CI) for time-variant categorical CES-D (Score =&gt;4 v. &lt;4)</i>                                                                                                                                                                                                                                                                                                                                                                                                                                                                                                                 |                        |                                                                   |                                                               |
| <b>All-cause mortality</b>                                                                                                                                                                                                                                                                                                                                                                                                                                                                                                                                                                   |                        |                                                                   |                                                               |
| Events, n                                                                                                                                                                                                                                                                                                                                                                                                                                                                                                                                                                                    | 4581                   | 1392                                                              | 3189                                                          |
| Crude                                                                                                                                                                                                                                                                                                                                                                                                                                                                                                                                                                                        | <b>1.66(1.54-1.80)</b> | <b>1.97(1.66-2.33)</b>                                            | <b>1.30(1.19-1.42)</b>                                        |
| Model 1 <sup>a</sup>                                                                                                                                                                                                                                                                                                                                                                                                                                                                                                                                                                         | <b>1.63(1.50-1.76)</b> | <b>1.74(1.46-2.07)</b>                                            | <b>1.42(1.29-1.55)</b>                                        |
| Model 2 <sup>b</sup>                                                                                                                                                                                                                                                                                                                                                                                                                                                                                                                                                                         | <b>1.42(1.31-1.54)</b> | <b>1.60(1.34-1.90)</b>                                            | <b>1.30(1.19-1.43)</b>                                        |
| Model 3 <sup>c</sup>                                                                                                                                                                                                                                                                                                                                                                                                                                                                                                                                                                         | <b>1.38(1.27-1.49)</b> | <b>1.57(1.32-1.87)</b>                                            | <b>1.27(1.16-1.39)</b>                                        |
| Model 4 <sup>d</sup>                                                                                                                                                                                                                                                                                                                                                                                                                                                                                                                                                                         | <b>1.24(1.13-1.35)</b> | <b>1.53(1.27-1.83)</b>                                            | <b>1.16(1.05-1.28)</b>                                        |
| Model 5 <sup>e</sup>                                                                                                                                                                                                                                                                                                                                                                                                                                                                                                                                                                         | <b>1.24(1.14-1.36)</b> | <b>1.48(1.27-1.78)</b>                                            | <b>1.17(1.06-1.30)</b>                                        |
| Model 4 + CES-D x self-reported health                                                                                                                                                                                                                                                                                                                                                                                                                                                                                                                                                       |                        | p-value for the interaction term - <b>0.005</b>                   |                                                               |
| <b>CVD Death</b>                                                                                                                                                                                                                                                                                                                                                                                                                                                                                                                                                                             |                        |                                                                   |                                                               |
| Events, n                                                                                                                                                                                                                                                                                                                                                                                                                                                                                                                                                                                    | 1551                   | 437                                                               | 1114                                                          |
| Crude                                                                                                                                                                                                                                                                                                                                                                                                                                                                                                                                                                                        | <b>1.61(1.41-1.85)</b> | <b>2.01(1.49-2.72)</b>                                            | <b>1.23(1.05-1.43)</b>                                        |
| Model 1 <sup>a</sup>                                                                                                                                                                                                                                                                                                                                                                                                                                                                                                                                                                         | <b>1.58(1.37-1.81)</b> | <b>1.76(1.29-2.40)</b>                                            | <b>1.35(1.15-1.58)</b>                                        |
| Model 2 <sup>b</sup>                                                                                                                                                                                                                                                                                                                                                                                                                                                                                                                                                                         | <b>1.31(1.13-1.51)</b> | <b>1.52(1.12-2.08)</b>                                            | <b>1.20(1.03-1.41)</b>                                        |
| Model 3 <sup>c</sup>                                                                                                                                                                                                                                                                                                                                                                                                                                                                                                                                                                         | <b>1.27(1.10-1.46)</b> | <b>1.53(1.12-2.09)</b>                                            | 1.17(1.00-1.37)                                               |
| Model 4 <sup>d</sup>                                                                                                                                                                                                                                                                                                                                                                                                                                                                                                                                                                         | 1.15(0.98-1.33)        | <b>1.47(1.07-2.04)</b>                                            | 1.06(0.90-1.26)                                               |
| Model 5 <sup>e</sup>                                                                                                                                                                                                                                                                                                                                                                                                                                                                                                                                                                         | 1.13(0.98-1.32)        | 1.37(0.99-1.91) p=0.06                                            | 1.07(0.90-1.27)                                               |
| Model 4 + CES-D x self-reported health                                                                                                                                                                                                                                                                                                                                                                                                                                                                                                                                                       |                        | p-value for the interaction term - <b>0.06</b>                    |                                                               |
| <b>NonCVD Death</b>                                                                                                                                                                                                                                                                                                                                                                                                                                                                                                                                                                          |                        |                                                                   |                                                               |
| Events, n                                                                                                                                                                                                                                                                                                                                                                                                                                                                                                                                                                                    | 3030                   | 955                                                               | 2075                                                          |
| Crude                                                                                                                                                                                                                                                                                                                                                                                                                                                                                                                                                                                        | <b>1.69(1.53-1.86)</b> | <b>1.95(1.58-2.39)</b>                                            | <b>1.34(1.20-1.50)</b>                                        |
| Model 1 <sup>a</sup>                                                                                                                                                                                                                                                                                                                                                                                                                                                                                                                                                                         | <b>1.65(1.50-1.83)</b> | <b>1.73(1.40-2.14)</b>                                            | <b>1.45(1.30-1.63)</b>                                        |
| Model 2 <sup>b</sup>                                                                                                                                                                                                                                                                                                                                                                                                                                                                                                                                                                         | <b>1.48(1.34-1.64)</b> | <b>1.63(1.32-2.02)</b>                                            | <b>1.35(1.23-1.51)</b>                                        |
| Model 3 <sup>c</sup>                                                                                                                                                                                                                                                                                                                                                                                                                                                                                                                                                                         | <b>1.44(1.30-1.59)</b> | <b>1.59(1.29-1.97)</b>                                            | <b>1.33(1.18-1.49)</b>                                        |
| Model 4 <sup>d</sup>                                                                                                                                                                                                                                                                                                                                                                                                                                                                                                                                                                         | <b>1.30(1.17-1.48)</b> | <b>1.58(1.27-2.24)</b>                                            | <b>1.22(1.08-1.38)</b>                                        |
| Model 5 + intervening non-fatal CVD event <sup>e</sup>                                                                                                                                                                                                                                                                                                                                                                                                                                                                                                                                       | <b>1.29(1.16-1.44)</b> | <b>1.54(1.24-1.92)</b>                                            | <b>1.22(1.08-1.38)</b>                                        |
| Model 4 + CES-D x self-reported health                                                                                                                                                                                                                                                                                                                                                                                                                                                                                                                                                       |                        | p-value for the interaction term - <b>0.03</b>                    |                                                               |
| <b>Cancer Death (a subset of nonCVD death)</b>                                                                                                                                                                                                                                                                                                                                                                                                                                                                                                                                               |                        |                                                                   |                                                               |
| Events, n                                                                                                                                                                                                                                                                                                                                                                                                                                                                                                                                                                                    | 1226                   | 475                                                               | 751                                                           |
| Crude                                                                                                                                                                                                                                                                                                                                                                                                                                                                                                                                                                                        | <b>1.27(1.09-1.53)</b> | <b>1.53(1.11-2.12)</b>                                            | 1.06(0.87-1.29)                                               |
| Model 1 <sup>a</sup>                                                                                                                                                                                                                                                                                                                                                                                                                                                                                                                                                                         | <b>1.29(1.09-1.53)</b> | <b>1.45(1.04-2.01)</b>                                            | 1.16(0.95-1.42)                                               |
| Model 2 <sup>b</sup>                                                                                                                                                                                                                                                                                                                                                                                                                                                                                                                                                                         | <b>1.25(1.05-1.48)</b> | <b>1.40(1.01-1.95)</b>                                            | 1.14(0.93-1.40)                                               |
| Model 3 <sup>c</sup>                                                                                                                                                                                                                                                                                                                                                                                                                                                                                                                                                                         | <b>1.20(1.01-1.43)</b> | 1.35(0.97-1.88)                                                   | 1.11(0.91-1.36)                                               |
| Model 4 <sup>d</sup>                                                                                                                                                                                                                                                                                                                                                                                                                                                                                                                                                                         | 1.16(0.96-1.39)        | 1.37(0.97-1.92)                                                   | 1.08(0.87-1.33)                                               |
| Model 5 + intervening non-fatal CVD event <sup>e</sup>                                                                                                                                                                                                                                                                                                                                                                                                                                                                                                                                       | 1.15(0.96-1.38)        | 1.36(0.97-1.91)                                                   | 1.08(0.90-1.34)                                               |
| Model 4 + CES-D x self-reported health                                                                                                                                                                                                                                                                                                                                                                                                                                                                                                                                                       |                        | p-value for the interaction term - 0.20                           |                                                               |
| <sup>a</sup> Model 1 adjusts for <i>socio-demographics</i> (age, gender, region, income, health insurance, education)<br><sup>b</sup> Model 2 adds to model 1 <i>medical conditions, physiological factors and medication use</i> (systolic blood pressure, total cholesterol, high density lipoprotein-cholesterol, use of aspirin, statins, antihypertensives, antidepressants, body mass index, logarithmically transformed Albumin to Creatinine Ratio; diabetes, cardiovascular disease, medication use as a proxy for chronic obstructive pulmonary disease, and cognitive impairment) |                        |                                                                   |                                                               |

---

<sup>c</sup>Model 3 adds to model 2 *behavioral risk factors* (pack-years of cigarette smoking, self-reported alcohol use, physical inactivity, medication non-adherence).

<sup>d</sup>Model 4 adds to model 3 *other factors* (physical health component score of SF-12, log-transformed high sensitivity C-reactive protein and perceived stress)

<sup>e</sup>Model 5 adds non-fatal CVD event – first nonfatal myocardial infarction or stroke since baseline.

HR = hazard ratio; CVD cardiovascular disease; CES-D = Centers for Epidemiology Studies-Depression

**Bold p-value < 0.05**; Missing data in covariates imputed using chained equations.

---

For peer review only

**Table 3. Association of baseline elevated depressive symptoms (CES-D $\geq$ 4) with mortality outcomes. Each participant contributes 1 measure of CES-D at baseline.**

|                                                    | Overall<br>n=29,491    | Self-reported general<br>health as “excellent or<br>very good”<br>n=13,711 | Self-reported general health<br>as “poor, fair or good”<br>n=15,780 |
|----------------------------------------------------|------------------------|----------------------------------------------------------------------------|---------------------------------------------------------------------|
|                                                    | HR (95%CI)             | HR (95%CI)                                                                 | HR (95%CI)                                                          |
| All-cause mortality                                | 4581                   | 1392                                                                       | 3189                                                                |
| Crude                                              | <b>1.54(1.42-1.68)</b> | <b>1.91(1.59-2.31)</b>                                                     | <b>1.18(1.07-1.30)</b>                                              |
| Model 1 <sup>a</sup>                               | <b>1.57(1.44-1.72)</b> | <b>1.76(1.45-2.12)</b>                                                     | <b>1.34(1.21-1.47)</b>                                              |
| Model 2 <sup>b</sup>                               | <b>1.32(1.25-1.49)</b> | <b>1.61(1.33-1.96)</b>                                                     | <b>1.22(1.11-1.35)</b>                                              |
| Model 3 <sup>c</sup>                               | <b>1.32(1.27-1.44)</b> | <b>1.56(1.29-1.90)</b>                                                     | <b>1.20(1.09-1.32)</b>                                              |
| Model 4 <sup>d</sup>                               | <b>1.18(1.07-1.29)</b> | <b>1.53(1.25-1.88)</b>                                                     | 1.09(0.98-1.20)                                                     |
| Model 4 + baseline CES-D<br>x self-reported health |                        |                                                                            | p-value for the interaction term - <b>0.002</b>                     |
| CVD Death                                          | 1551                   | 437                                                                        | 1114                                                                |
| Crude                                              | <b>1.55(1.34-1.78)</b> | <b>2.16(1.58-2.96)</b>                                                     | <b>1.13(0.97-1.33)</b>                                              |
| Model 1 <sup>a</sup>                               | <b>1.57(1.35-1.81)</b> | <b>1.96(1.42-2.71)</b>                                                     | <b>1.29(1.10-1.52)</b>                                              |
| Model 2 <sup>b</sup>                               | <b>1.28(1.10-1.48)</b> | <b>1.71(1.23-2.38)</b>                                                     | 1.14(0.97-1.34)                                                     |
| Model 3 <sup>c</sup>                               | <b>1.24(1.07-1.44)</b> | <b>1.70(1.22-2.36)</b>                                                     | 1.11(0.94-1.31)                                                     |
| Model 4 <sup>d</sup>                               | 1.10(0.94-1.29)        | <b>1.63(1.16-2.30)</b>                                                     | 1.00(0.84-1.20)                                                     |
| Model 4 + baseline CES-D<br>x self-reported health |                        |                                                                            | p-value for the interaction term - <b>0.01</b>                      |
| NonCVD Death                                       | 3030                   | 955                                                                        | 2075                                                                |
| Crude                                              | <b>1.54(1.39-1.71)</b> | <b>1.80(1.42-2.26)</b>                                                     | <b>1.21(1.08-1.35)</b>                                              |
| Model 1 <sup>a</sup>                               | <b>1.57(1.42-1.75)</b> | <b>1.66(1.31-2.10)</b>                                                     | <b>1.36(1.21-1.53)</b>                                              |
| Model 2 <sup>b</sup>                               | <b>1.41(1.26-1.56)</b> | <b>1.56(1.29-1.98)</b>                                                     | <b>1.27(1.13-1.43)</b>                                              |
| Model 3 <sup>c</sup>                               | <b>1.36(1.22-1.51)</b> | <b>1.49(1.17-1.90)</b>                                                     | <b>1.25(1.11-1.41)</b>                                              |
| Model 4 <sup>d</sup>                               | <b>1.21(1.08-1.36)</b> | <b>1.48(1.15-1.89)</b>                                                     | <b>1.14(1.00-1.29)</b>                                              |
| Model 4 + baseline CES-D<br>x self-reported health |                        |                                                                            | p-value for the interaction term - <b>0.06</b>                      |
| Cancer Death (a subset of<br>nonCVD death)         | 1226                   | 475                                                                        | 751                                                                 |
| Crude                                              | <b>1.21(1.02-1.44)</b> | <b>1.63(1.16-2.30)</b>                                                     | 0.97(0.79-1.19)                                                     |
| Model 1 <sup>a</sup>                               | <b>1.27(1.06-1.52)</b> | <b>1.58(1.12-2.23)</b>                                                     | 1.09(0.89-1.35)                                                     |
| Model 2 <sup>b</sup>                               | <b>1.22(1.02-1.47)</b> | <b>1.53(1.08-2.17)</b>                                                     | 1.07(0.87-1.33)                                                     |
| Model 3 <sup>c</sup>                               | 1.17(0.98-1.41)        | <b>1.45(1.02-2.05)</b>                                                     | 1.05(0.85-1.30)                                                     |
| Model 4 <sup>d</sup>                               | 1.12(0.93-1.36)        | <b>1.49(1.03-2.13)</b>                                                     | 1.01(0.81-1.27)                                                     |
| Model 4 + baseline CES-D<br>x self-reported health |                        |                                                                            | p-value for the interaction term - <b>0.07</b>                      |

<sup>a</sup>Model 1 adjusts for *socio-demographics* (age, gender, region, income, health insurance, education)  
<sup>b</sup>Model 2 adds to model 1 *medical conditions, physiological factors and medication use* (systolic blood pressure, total cholesterol, high density lipoprotein-cholesterol, use of aspirin, statins, antihypertensives, antidepressants, body mass index, logarithmically transformed Albumin to Creatinine Ratio; diabetes, cardiovascular disease, medication use as a proxy for chronic obstructive pulmonary disease, and cognitive impairment)  
<sup>c</sup>Model 3 adds to model 2 *behavioral risk factors* (pack-years of cigarette smoking, self-reported alcohol use, physical inactivity, medication non-adherence).  
<sup>d</sup>Model 4 adds to model 3 *other factors* (physical health component score of SF-12, log-transformed high sensitivity C-reactive protein and perceived stress)  
HR = hazard ratio; CVD cardiovascular disease; CES-D = Centers for Epidemiology Studies-Depression  
HR and 95% CI were estimated by Cox proportional hazard regression models. Bold p-value < 0.05; Missing data in covariates imputed using chained equations.

1  
2  
3  
4  
5  
6  
7

## Figure Legend

8  
9  
10  
11  
12  
13  
14  
15  
16  
17  
18  
19  
20  
21  
22  
23  
24  
25  
26  
27  
28  
29  
30  
31  
32  
33  
34  
35  
36  
37  
38  
39  
40  
41  
42  
43  
44  
45  
46  
47  
48  
49  
50  
51  
52  
53  
54  
55  
56  
57  
58  
59  
60

**Figure 1.** Cohort Flow Diagram: Exclusion cascade of depressive symptoms to mortality endpoints analysis.

**Figure 2.** Kaplan Meier Curves of Time-varying depressive symptoms and all-cause mortality, cardiovascular disease death, noncardiovascular disease death and cancer death.

For peer review only

1  
2  
3  
4  
5  
6  
7  
8  
9  
10  
11  
12  
13  
14  
15  
16  
17  
18  
19  
20  
21  
22  
23  
24  
25  
26  
27  
28  
29  
30  
31  
32  
33  
34  
35  
36  
37  
38  
39  
40  
41  
42  
43  
44  
45  
46  
47  
48  
49  
50  
51  
52  
53  
54  
55  
56  
57  
58  
59  
60

Figure 1. Cohort Flow Diagram: Exclusion cascade of Depressive symptoms to Mortality Endpoints analysis.

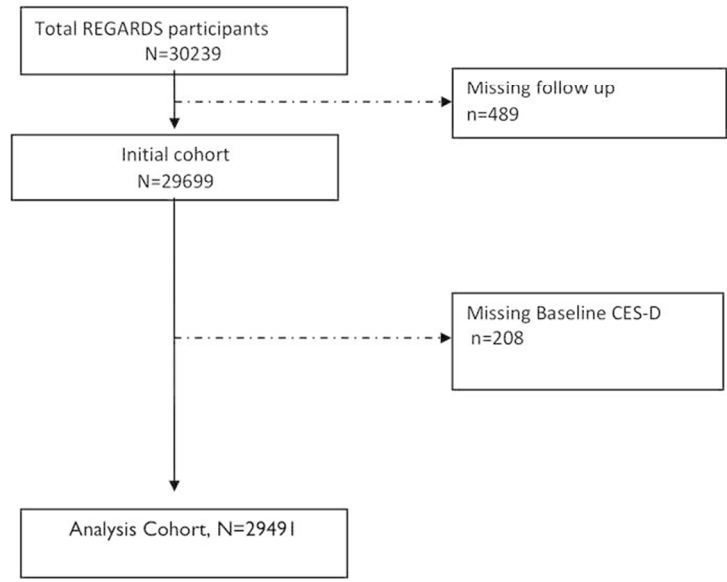

Figure 1. Cohort Flow Diagram: Exclusion cascade of depressive symptoms to mortality endpoints analysis.

254x190mm (96 x 96 DPI)

Figure 2. Kaplan Meier Curves of Time-varying depressive symptoms and all-cause mortality, cardiovascular disease death, noncardiovascular disease death and cancer.

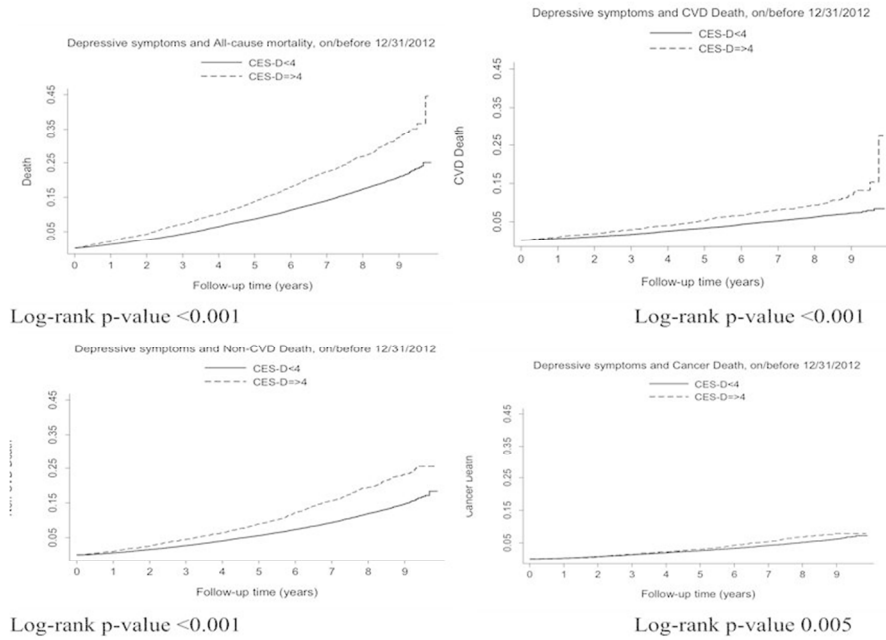

Figure 2. Kaplan Meier Curves of Time-varying depressive symptoms and all-cause mortality, cardiovascular disease death, noncardiovascular disease death and cancer death.

254x190mm (96 x 96 DPI)



Supplementary Material

eFigure 1. Percent of participants with depression measured at baseline who had their second and third follow up measured by years of follow up.

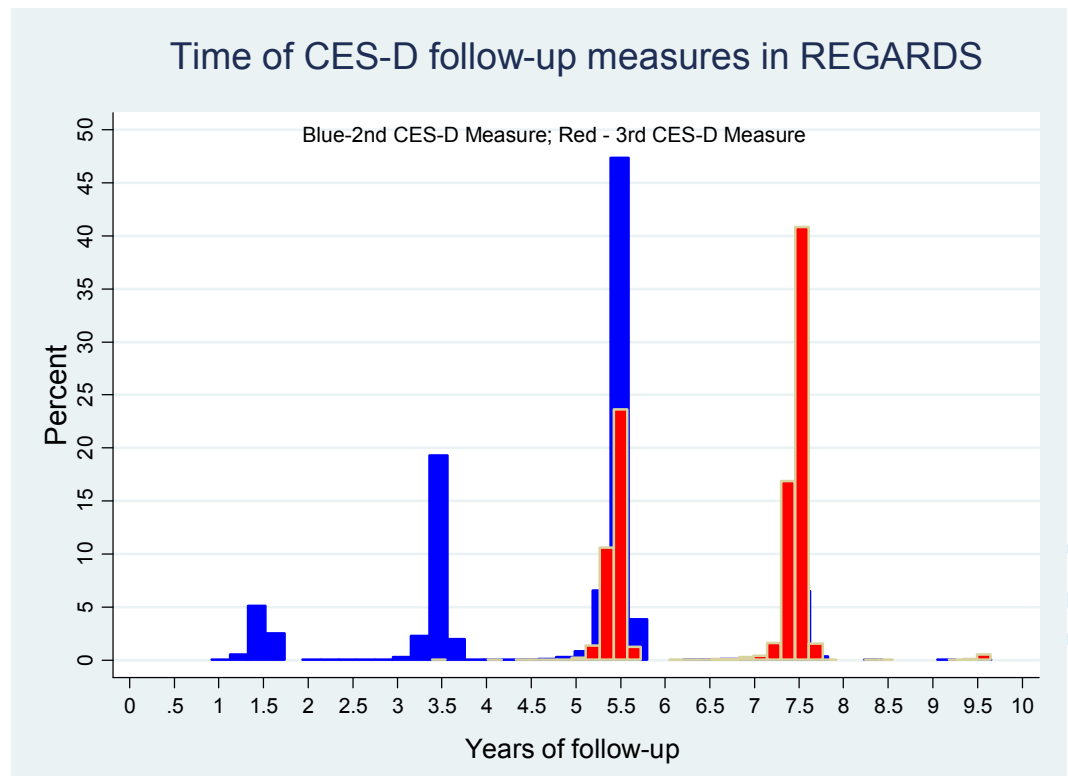

\*\*\*Percent\*\* is a proportion of participants reporting CES-D scores at certain times of all participants available for either 2<sup>nd</sup> follow-up (blue) or 3<sup>rd</sup> follow-up (red).

|              | Participants, n | Mean | SD  | Minimum | Maximum |
|--------------|-----------------|------|-----|---------|---------|
| Second CES-D | 20934           | 4.8  | 1.5 | 0.9     | 9.7     |
| Third CES-D  | 12451           | 2.1  | 0.4 | 1.0     | 4.2     |

eFigure 2. Timing of CES-D follow up measures in REGARDS by self reported health at baseline.

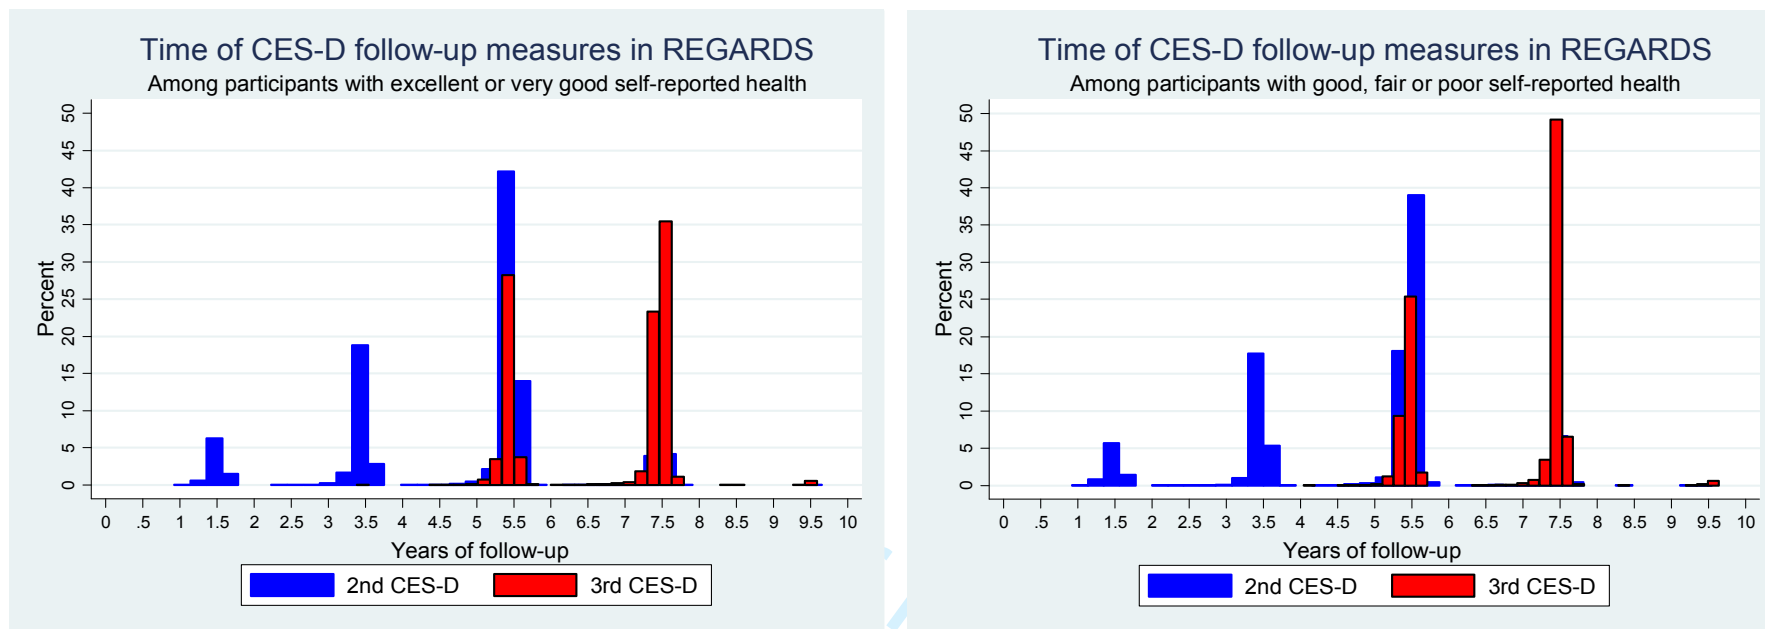

\*"Percent" is a proportion of participants reporting CES-D scores at certain times, of all participants available for either 2<sup>nd</sup> follow-up (blue) or 3<sup>rd</sup> follow-up (red).

| Self-reported general health as "excellent or very good" |       |                                                                              |     |         |         | Self-reported general health as "poor, fair or good" |                                                                              |     |         |         |
|----------------------------------------------------------|-------|------------------------------------------------------------------------------|-----|---------|---------|------------------------------------------------------|------------------------------------------------------------------------------|-----|---------|---------|
|                                                          |       | Time since preceding CES-D measurement (baseline or second follow-up), years |     |         |         |                                                      | Time since preceding CES-D measurement (baseline or second follow-up), years |     |         |         |
|                                                          | N     | Mean                                                                         | SD  | Minimum | Maximum | N                                                    | Mean                                                                         | SD  | Minimum | Maximum |
| Second CES-D                                             | 10448 | 4.8                                                                          | 1.5 | 0.9     | 9.7     | 10448                                                | 4.8                                                                          | 1.5 | 0.9     | 9.5     |
| Third CES-D                                              | 6472  | 2.1                                                                          | 0.4 | 1.7     | 4.2     | 5959                                                 | 2.1                                                                          | 0.5 | 1.0     | 4.2     |

**eTable 1. Proportion of persons with elevated depressive symptoms by baseline self-reported health status (original categories, without collapsing).**

| Self-reported general health | Baseline                      |               |          | Second CES-D                    |               |          | Third CES-D                      |               |          |
|------------------------------|-------------------------------|---------------|----------|---------------------------------|---------------|----------|----------------------------------|---------------|----------|
|                              | CES-D<4, n, %                 | CES-D≥4, n, % | Total, n | CESD<4, n, %                    | CES-D≥4, n, % | Total, n | CESD<4, n, %                     | CES-D≥4, n, % | Total, n |
| <b>Excellent</b>             | 4515<br>95.9 %                | 195<br>4.1%   | 4710     | 3444<br>94.7%                   | 194<br>5.3%   | 3638     | 2109<br>94.6%                    | 120<br>5.4%   | 2229     |
| <b>Very good</b>             | 8450<br>94.1%                 | 530<br>5.9%   | 8980     | 6332<br>93.0%                   | 478<br>7.0%   | 6810     | 3938<br>92.8%                    | 305<br>7.2%   | 4243     |
| <b>Good</b>                  | 9181<br>89.1%                 | 1124<br>10.9% | 10305    | 6363<br>88.6%                   | 818<br>11.4%  | 7181     | 3717<br>88.9%                    | 464<br>11.1%  | 4181     |
| <b>Fair</b>                  | 3424<br>77.8 %                | 975<br>22.2 % | 4399     | 2185<br>79.7%                   | 556<br>20.3%  | 2741     | 1236<br>82.0%                    | 271<br>18.0%  | 1507     |
| <b>Poor</b>                  | 614<br>59.2%                  | 424<br>40.9%  | 1038     | 322<br>61.2%                    | 204<br>38.8%  | 526      | 177<br>65.3%                     | 94<br>34.7%   | 271      |
|                              |                               |               | 29432    |                                 |               | 20896    |                                  |               | 12431    |
|                              | <b>Frequency Missing = 59</b> |               |          | <b>Frequency Missing = 8595</b> |               |          | <b>Frequency Missing = 17060</b> |               |          |

1  
2  
3  
4  
5  
6  
7  
8  
9  
10  
11  
12  
13  
14  
15  
16  
17  
18  
19  
20  
21  
22  
23  
24  
25  
26  
27  
28  
29  
30  
31  
32  
33  
34  
35  
36  
37  
38  
39  
40  
41  
42  
43  
44  
45  
46  
47

For peer review only

**eTable 2. Reasons for non-cardiovascular disease death in the REGARDS study**

| <i>Causes of Death</i>            | Overall                 |         | Self-reported general health as “excellent or very good”<br>n=13,711 |                         | Self-reported general health as “poor, fair or good”<br>n=15,780 |         |
|-----------------------------------|-------------------------|---------|----------------------------------------------------------------------|-------------------------|------------------------------------------------------------------|---------|
|                                   | n                       | Percent | Frequency                                                            | Percent                 | Frequency                                                        | Percent |
| Cancer                            | 1226                    | 44.3    | 474                                                                  | 54.0                    | 747                                                              | 39.7    |
| Accidents/Injury/Suicide/Homicide | 164                     | 5.9     | 52                                                                   | 5.9                     | 111                                                              | 5.9     |
| Suicide                           | 3                       | 0.1     | 2                                                                    | 0.2                     | 1                                                                | 0.05    |
| Liver disease                     | 56                      | 2.0     | 14                                                                   | 1.6                     | 42                                                               | 2.2     |
| Infection                         | 498                     | 18.0    | 132                                                                  | 15.0                    | 365                                                              | 19.4    |
| ESRD                              | 119                     | 4.3     | 23                                                                   | 2.6                     | 95                                                               | 5.1     |
| Dementia                          | 187                     | 6.8     | 74                                                                   | 8.4                     | 112                                                              | 6.0     |
| COPD                              | 247                     | 8.9     | 43                                                                   | 4.9                     | 204                                                              | 10.9    |
| Pulmonary Embolism                | 38                      | 1.34    | 11                                                                   | 1.3                     | 27                                                               | 1.4     |
| Other                             | 232                     | 8.4     | 55                                                                   | 6.3                     | 177                                                              | 9.4     |
|                                   | Frequency Missing = 263 |         |                                                                      | Frequency Missing = 272 |                                                                  |         |

**eTable 3. Baseline characteristics of REGARDS participants, who had all 3 CES-D measures vs. those with 1 or 2 CES-D measures**

| Characteristics                                          | 1 or 2 CES-D measures<br>(n=17,040) | All 3 CES-D measures<br>(n=12, 451) | <i>p</i> value |
|----------------------------------------------------------|-------------------------------------|-------------------------------------|----------------|
| <b><i>Socio-demographics</i></b>                         |                                     |                                     |                |
| Age, <i>M</i> (SD)                                       | 65.0 +- 10.0                        | 64.7 +- 8.5                         | 0.0069         |
| Female, n (%)                                            | 9300 (54.6)                         | 6945 (55.8)                         | 0.04           |
| African American, n (%)                                  | 7709 (45.2)                         | 4420 (35.5)                         | <.001          |
| Less than high school education, n (%)                   | 2583 (15.2)                         | 1113 (8.9)                          | <.001          |
| Annual Household Income, n (%)                           |                                     |                                     | <.001          |
| Less than \$20,000                                       | 3549 (20.8)                         | 1773 (14.2)                         |                |
| No Health Insurance, n (%)                               | 1290 (7.6)                          | 636 (5.1)                           | <.001          |
| Region, n (%)                                            |                                     |                                     | <.001          |
| Stroke belt                                              | 5806 (34.1)                         | 4387 (35.2)                         |                |
| Stroke buckle                                            | 3887 (22.8)                         | 2301 (18.5)                         |                |
| Non-stroke belt or buckle                                | 7347 (43.1)                         | 5763 (46.3)                         |                |
| <b><i>General health and medical conditions</i></b>      |                                     |                                     |                |
| Self-reported general health, n (%)                      |                                     |                                     | <.001          |
| Poor, fair, good                                         | 9783 (57.5)                         | 5959 (47.9)                         |                |
| Excellent, very good                                     | 7218 (42.5)                         | 6472 (52.1)                         |                |
| Cardiovascular disease (CHD, stroke, PAD, AA), n (%)     | 4379 (25.7)                         | 2446 (19.6)                         | <.001          |
| Diabetes, n (%)                                          | 4083 (25.0)                         | 2169 (18.0)                         | <.001          |
| COPD, n (%)                                              | 1612 (9.5)                          | 1098 (8.8)                          | 0.05           |
| Physical component score on SF-12 scale, <i>M</i> (SD)   | 45.5 +- 11.0                        | 47.6 +- 9.9                         | <.001          |
| <b><i>Physiological risk factors</i></b>                 |                                     |                                     |                |
| Body Mass Index, kg/m <sup>2</sup> , <i>M</i> (SD)       | 29.4 +- 6.3                         | 29.2 +- 6.0                         | 0.0024         |
| Systolic Blood Pressure, mmHg, <i>M</i> (SD)             | 128.0 +- 17.2                       | 127.0 +- 15.9                       | <.001          |
| Total Cholesterol, mg/dL, <i>M</i> (SD)                  | 192.2 +- 41.0                       | 191.9 +- 39.0                       | 0.5732         |
| High-Density Lipoprotein, mg/dL, <i>M</i> (SD)           | 51.4 +- 16.1                        | 52.4 +- 16.3                        | <.001          |
| QT Interval, corrected for heart rate, ms, <i>M</i> (SD) | 408.4 +- 24.2                       | 406.3 +- 22.7                       | <.001          |
| High-Sensitivity C-Reactive Protein, mg/L, median, IQR   | 2.3[1.0-5.4]                        | 2.1[0.9-4.7]                        | <.001          |
| Albumin to Creatinine Ratio, mg/g, median, IQR           | 7.9[4.8-18.7]                       | 6.9[4.5-13.5]                       | <.001          |

| <b>Medications</b>             |                                                  |              |              |       |
|--------------------------------|--------------------------------------------------|--------------|--------------|-------|
| 1                              | Antihypertensive medication use, n (%)           | 9079 (53.9)  | 6118 (49.7)  | <.001 |
| 2                              | Statin use, n (%)                                | 5344 (31.4)  | 3951 (31.8)  | 0.53  |
| 3                              | Aspirin use, n (%)                               | 7297 (42.8)  | 5493 (44.1)  | 0.03  |
| 4                              | Antidepressant use, n (%)                        | 2440 (14.4)  | 1646 (13.2)  | 0.006 |
| 5                              |                                                  |              |              |       |
| <b>Behavioral risk factors</b> |                                                  |              |              |       |
| 6                              |                                                  |              |              |       |
| 7                              | Self-reported smoking, pack years, <i>M</i> (SD) | 14.5 +- 24.4 | 12.2 +- 21.0 | <.001 |
| 8                              | Current Smoking, n(%)                            | 2786 (16.4)  | 1477 (11.9)  | <.001 |
| 9                              | Alcohol use, n (%)                               |              |              | <.001 |
| 10                             | Heavy                                            | 652 (3.9)    | 520 (4.2)    |       |
| 11                             | Moderate                                         | 5180 (31.1)  | 4446 (36.3)  |       |
| 12                             | None                                             | 10822 (65.0) | 7294 (59.5)  |       |
| 13                             | Physical inactivity, n (%)                       | 6150 (36.7)  | 3854 (31.3)  | <.001 |
| 14                             | Medication non-adherence, n (%)                  | 4548 (29.6)  | 3411 (29.9)  | 0.59  |
| 15                             | Impaired cognitive status (Cognitive score ≤ 4)  | 1300 (9.4)   | 588 (5.9)    | <.001 |
| 16                             | Elevated perceived stress (PSS≥5)                | 5437 (31.9)  | 3154 (25.3)  | <.001 |
| 17                             |                                                  |              |              |       |
| 18                             |                                                  |              |              |       |

19

20 *p* Values from chi square, Student t tests. CES-D = Centers for Epidemiology Studies – Depression scale.

21 CVD = cardiovascular disease. IQR = interquartile range. *M* = mean. SD = standard deviation.

22 Stroke Belt defined as the states of Alabama, Arkansas, Louisiana, Mississippi, Tennessee and the

23 noncoastal regions within the states of North Carolina, South Carolina and Georgia. Stroke buckle defined

24 as coastal regions within the states of North Carolina, South Carolina and Georgia.

25 Diabetes defined as fasting blood glucose ≥126 or random glucose >200 mL/dL or oral hypoglycemic or

26 insulin use. CVD defined as baseline coronary heart disease, stroke, periphery artery disease or aortic

27 aneurism.

28

29

30

31

32

33

34

35

36

37

38

39

40

41

42

43

44

45

46

47

STROBE Statement—Checklist of items that should be included in reports of *cohort studies*

|                           | Item No/Page #   | Recommendation                                                                                                                                                                 |
|---------------------------|------------------|--------------------------------------------------------------------------------------------------------------------------------------------------------------------------------|
| <b>Title and abstract</b> | 1 (page 1)       | (a) Indicate the study's design with a commonly used term in the title or the <b>abstract</b>                                                                                  |
|                           | (Page 2)         | (b) Provide in the abstract an informative and balanced summary of what was done and what was found                                                                            |
| <b>Introduction</b>       |                  |                                                                                                                                                                                |
| Background/rationale      | 2 (Page 3)       | Explain the scientific background and rationale for the investigation being reported                                                                                           |
| Objectives                | 3 (pages 3)      | State specific objectives, including any prespecified hypotheses                                                                                                               |
| <b>Methods</b>            |                  |                                                                                                                                                                                |
| Study design              | 4 (Page 3 and 4) | Present key elements of study design early in the paper                                                                                                                        |
| Setting                   | 5 (page 4-7),    | Describe the setting, locations, and relevant dates, including periods of recruitment, exposure, follow-up, and data collection                                                |
| Participants              | 6 (page 4, 8)    | (a) Give the eligibility criteria, and the sources and methods of selection of participants. Describe methods of follow-up                                                     |
|                           | n/a              | (b) For matched studies, give matching criteria and number of exposed and unexposed                                                                                            |
| Variables                 | 7 (page 4-6)     | Clearly define all outcomes, exposures, predictors, potential confounders, and effect modifiers. Give diagnostic criteria, if applicable                                       |
| Data sources/ measurement | 8 (pages 4-6)    | For each variable of interest, give sources of data and details of methods of assessment (measurement). Describe comparability of assessment methods if there is more than one |



|                        |               |                                                                                                                                                                                                   |
|------------------------|---------------|---------------------------------------------------------------------------------------------------------------------------------------------------------------------------------------------------|
|                        |               | group                                                                                                                                                                                             |
| Bias                   | 9 (page 12)   | Describe any efforts to address potential sources of bias                                                                                                                                         |
| Study size             | 10 (page 8)   | Explain how the study size was arrived at                                                                                                                                                         |
| Quantitative variables | 11 (page 4-7) | Explain how quantitative variables were handled in the analyses. If applicable, describe which groupings were chosen and why                                                                      |
| Statistical methods    | 12 (page 6-8) | (a) Describe all statistical methods, including those used to control for confounding                                                                                                             |
|                        | Pages 7-8     | (b) Describe any methods used to examine subgroups and interactions                                                                                                                               |
|                        | Page 8        | (c) Explain how missing data were addressed                                                                                                                                                       |
|                        | Page 7        | (d) If applicable, explain how loss to follow-up was addressed                                                                                                                                    |
|                        | Page 8        | (e) Describe any sensitivity analyses                                                                                                                                                             |
| <b>Results</b>         |               |                                                                                                                                                                                                   |
| Participants           | 13 (page 8)   | (a) Report numbers of individuals at each stage of study—eg numbers potentially eligible, examined for eligibility, confirmed eligible, included in the study, completing follow-up, and analysed |
|                        | Page 8        | (b) Give reasons for non-participation at each stage                                                                                                                                              |
|                        | Figure 1      | (c) Consider use of a flow diagram                                                                                                                                                                |
| Descriptive data       | 14 (page 8-9) | (a) Give characteristics of study participants (eg demographic, clinical, social) and information on exposures and potential confounders                                                          |
|                        | Page 8        | (b) Indicate number of participants with missing data for each variable of interest                                                                                                               |
|                        | Pages 9       | (c) Summarise follow-up time (eg, average and total amount)                                                                                                                                       |

|                          |                  |                                                                                                                                                                                                              |
|--------------------------|------------------|--------------------------------------------------------------------------------------------------------------------------------------------------------------------------------------------------------------|
| Outcome data             | 15 (page 9)      | Report numbers of outcome events or summary measures over time                                                                                                                                               |
| Main results             | 16 (pages 9-10)  | (a) Give unadjusted estimates and, if applicable, confounder-adjusted estimates and their precision (eg, 95% confidence interval). Make clear which confounders were adjusted for and why they were included |
|                          | Page 6, 8, 19-20 | (b) Report category boundaries when continuous variables were categorized                                                                                                                                    |
|                          | n/a              | (c) If relevant, consider translating estimates of relative risk into absolute risk for a meaningful time period                                                                                             |
| Other analyses           | 17 (pages 10)    | Report other analyses done—eg analyses of subgroups and interactions, and sensitivity analyses                                                                                                               |
| <b>Discussion</b>        |                  |                                                                                                                                                                                                              |
| Key results              | 18 (page 10)     | Summarise key results with reference to study objectives                                                                                                                                                     |
| Limitations              | 19 (pages 12)    | Discuss limitations of the study, taking into account sources of potential bias or imprecision. Discuss both direction and magnitude of any potential bias                                                   |
| Interpretation           | 20 (page 11-12)  | Give a cautious overall interpretation of results considering objectives, limitations, multiplicity of analyses, results from similar studies, and other relevant evidence                                   |
| Generalisability         | 21 (page 12)     | Discuss the generalisability (external validity) of the study results                                                                                                                                        |
| <b>Other information</b> |                  |                                                                                                                                                                                                              |
| Funding                  | 22 (page 16)     | Give the source of funding and the role of the funders for the present study and, if applicable, for the original study on which the present                                                                 |

|  |  |                  |
|--|--|------------------|
|  |  | article is based |
|--|--|------------------|

\*Give information separately for exposed and unexposed groups.

**Note:** An Explanation and Elaboration article discusses each checklist item and gives methodological background and published examples of transparent reporting. The STROBE checklist is best used in conjunction with this article (freely available on the Web sites of PLoS Medicine at <http://www.plosmedicine.org/>, Annals of Internal Medicine at <http://www.annals.org/>, and Epidemiology at <http://www.epidem.com/>). Information on the STROBE Initiative is available at <http://www.strobe-statement.org>.

For peer review only

# BMJ Open

## An observational study of the differential impact of time-varying depressive symptoms on all-cause and cause-specific mortality by health status in community dwelling adults: The REGARDS study

|                                 |                                                                                                                                                                                                                                                                                                                                                                                                                                                                                                                                                                                                                                               |
|---------------------------------|-----------------------------------------------------------------------------------------------------------------------------------------------------------------------------------------------------------------------------------------------------------------------------------------------------------------------------------------------------------------------------------------------------------------------------------------------------------------------------------------------------------------------------------------------------------------------------------------------------------------------------------------------|
| Journal:                        | <i>BMJ Open</i>                                                                                                                                                                                                                                                                                                                                                                                                                                                                                                                                                                                                                               |
| Manuscript ID                   | bmjopen-2017-017385.R1                                                                                                                                                                                                                                                                                                                                                                                                                                                                                                                                                                                                                        |
| Article Type:                   | Research                                                                                                                                                                                                                                                                                                                                                                                                                                                                                                                                                                                                                                      |
| Date Submitted by the Author:   | 23-Aug-2017                                                                                                                                                                                                                                                                                                                                                                                                                                                                                                                                                                                                                                   |
| Complete List of Authors:       | Moise, Nathalie; Columbia University Medical Center, Center for Behavioral Cardiovascular Health<br>Khodneva, Yulia; University of Alabama School of Medicine<br>Jannat-Khah, Deanna; NewYork-Presbyterian Hospital/Weill Cornell Medical Center<br>Richman, Joshua; University of Alabama School of Medicine<br>Davidson, Karina; Columbia University Medical Center, Medicine<br>Kronish, Ian M. ; Columbia University Medical Center, Center Behavioral Cardiovascular Health<br>Shaffer, Jonathan; University of Colorado Denver Department of Psychology<br>Safford, Monika; Cornell University Joan and Sanford I Weill Medical College |
| <b>Primary Subject Heading</b>: | Mental health                                                                                                                                                                                                                                                                                                                                                                                                                                                                                                                                                                                                                                 |
| Secondary Subject Heading:      | Mental health                                                                                                                                                                                                                                                                                                                                                                                                                                                                                                                                                                                                                                 |
| Keywords:                       | mortality, health status, Depression & mood disorders < PSYCHIATRY                                                                                                                                                                                                                                                                                                                                                                                                                                                                                                                                                                            |
|                                 |                                                                                                                                                                                                                                                                                                                                                                                                                                                                                                                                                                                                                                               |

SCHOLARONE™  
Manuscripts

1 **An observational study of the differential impact of time-varying depressive symptoms on**  
2  
3 **all-cause and cause-specific mortality by health status in community dwelling adults: The**  
4  
5 **REGARDS study**

6  
7  
8 **Running Title:** depressive symptoms and mortality

9  
10 **Authors:** Nathalie Moise, MD, MS<sup>1</sup> (assistant professor); Yulia Khodneva, MD, PhD<sup>2</sup> (medical  
11 resident); Deanna Pereira Jannat-Khah, DrPH, MSPH<sup>3</sup> (senior research data analyst); Joshua  
12 Richman, MD, PhD<sup>2</sup> (professor); Karina W. Davidson, PhD<sup>1</sup> (professor); Ian M. Kronish, MD,  
13 MPH<sup>1</sup> (assistant professor); Jonathan Shaffer, PhD<sup>4</sup> (assistant professor); Monika M. Safford,  
14 MD<sup>3</sup> (professor)

15  
16  
17  
18 **Affiliations:** <sup>1</sup>Center for Behavioral Cardiovascular Health, Department of Medicine, Division of  
19 Cardiology, Columbia University Medical Center, New York, NY; <sup>2</sup>University of Alabama at  
20 Birmingham, Birmingham, AL; <sup>3</sup>Weill Cornell Medical College, New York, NY.

21  
22  
23  
24 <sup>4</sup>Department of Psychology, University of Colorado Denver;

25  
26 **Corresponding Author:**

27 Nathalie Moise, MD, MS  
28 Center for Behavioral and Cardiovascular Health, Department of Medicine  
29 Columbia University Medical Center  
30 622 W. 168<sup>th</sup> Street, PH9- Room 321  
31 New York, NY 10032  
32 Phone: 212-342-2889  
33 Fax: 212-342-3431  
34 Email: [nm2562@cumc.columbia.edu](mailto:nm2562@cumc.columbia.edu)

35  
36  
37 **Journal Subject Codes:** mortality, depression, health status

38  
39  
40 **Total Document Text Count:** 3063

41  
42 **Abstract:** 240/300  
43  
44  
45  
46  
47  
48  
49  
50  
51  
52  
53  
54  
55  
56  
57  
58  
59  
60

## Abstract

**Objective:** To assess the association between time-varying depressive symptoms with all-cause and cause-specific mortality

**Design:** The Reasons for Geographic and Racial Differences in Stroke (REGARDS) is a national, population-based longitudinal study conducted from 2003-2007.

**Setting:** General continental U.S. communities

**Participants:** 29,491 black and white U.S. adults  $\geq 45$  years randomly sampled within race-sex-geographic strata

**Exposure:** Elevated depressive symptoms (CES-D-4  $\geq 4$ ) measured at baseline and on average 5 and 7 years later

**Main Outcome Measures:** Cox proportional hazard regression models assessed cancer, non-cardiovascular (CVD), CVD and all-cause mortality.

**Results:** The average age was 64.9 years; 55% were female; 41% black; 11.0% had elevated depressive symptoms; 54% had poor, fair or good health. Time-varying depressive symptoms were significantly associated with nonCVD (aHR=1.29, 95% CI 1.16-1.44) and all-cause (aHR=1.24, 95%CI 1.14-1.39), but not cancer (aHR=1.15, 95%CI 0.96-1.38) or CVD (aHR=1.13, 95%CI 0.98-1.32) death adjusting for demographics, chronic clinical diseases, behavioral risk factors, and physiologic factors. Depressive symptoms were related to all-cause (aHR=1.48, 95%CI 1.27-1.78), CVD (aHR=1.37, 95%CI 0.99-1.91), nonCVD (aHR=1.54, 95%CI 1.24-1.92) and cancer (aHR=1.36 95% 0.97-1.91) death in those who reported excellent or very good health. The analyses of the association between one measure of baseline depressive symptoms and mortality analyses yielded similar results.

1 **Conclusions:** Time-varying depressive symptoms confer an increased risk for all-cause  
2 mortality, CVD, non-CVD death and cancer death, particularly in those with excellent or very  
3 good health. These findings may have implications for timely treatment, regardless of health  
4 status.  
5  
6  
7  
8  
9

### 10 **Strengths and limitations of this study.**

- 11 • Depression is a relapsing/remitting disease and our study is one of the first to use multiple  
12 measurements of depression to demonstrate a time varying relationship between  
13 depression and mortality, including cancer mortality, in a large, diverse cohort.
  - 14 • To our knowledge, we are also the first to report a significant moderating effect of self-  
15 reported health on the relationship between depressive symptoms and cause-specific  
16 mortality, with depression predicting mortality particularly in those with excellent or very  
17 good reported health.
  - 18 • Our analyses were limited by the use of the short form of the CES-D scale
  - 19 • The REGARDS cohort is regionally specific, limiting generalizability.
- 20  
21  
22  
23  
24  
25  
26  
27  
28  
29  
30  
31  
32  
33  
34  
35  
36  
37  
38  
39  
40  
41  
42  
43  
44  
45  
46  
47  
48  
49  
50  
51  
52  
53  
54  
55  
56  
57  
58  
59  
60

## Introduction

It is well known that elevated depressive symptoms predict mortality,<sup>1</sup> both in high-risk individuals with chronic illnesses like cardiovascular disease (CVD), and in general populations.<sup>2-4 5-8</sup> More recently, several studies have shown that depressive symptoms both preceding and following cancer diagnosis may confer an increased risk of cancer death as well.<sup>9,10</sup>

However, depressive symptoms relapse and remit, and prior studies on the relationship between depressive symptoms and mortality have been limited by one measurement of depressive symptoms.<sup>1</sup> Recently, Lasserre et al. (2016) found that current but not remitted depressive symptoms predict all-cause mortality, but again depression diagnoses and history were ascertained at one time point.<sup>11</sup> In addition, prior literature has often been marked by inadequate adjustment for important covariates, such as behavioral risk factors. To our knowledge, few if any prior studies have examined the time-varying association between depressive symptoms and excess causes of death, including all-cause and cause specific mortality. In addition, self-perceived health status may predict mortality<sup>12</sup> and complicate the relationship between depressive symptoms and poor outcomes.<sup>13</sup> It is unknown whether depressive symptoms confer an increased risk of excess mortality equally in those with self-reported excellent/very good (in whom depression may be less likely to be recognized) and good/fair/poor health.

The purpose of our study is to examine the association between time-varying depressive symptoms with cancer, CVD, nonCVD and all-cause mortality in the Reasons for Geographic and Racial Differences in Stroke (REGARDS) study, a broad, diverse population cohort with repeat measurements of depressive symptoms. We stratify by self-reported baseline health status



1 (very good or excellent vs. poor, fair or good) to further isolate the association between  
2  
3 depressive symptoms and excess mortality.  
4  
5  
6  
7

## 8 **Methods**

9  
10 The REGARDS study is a national cohort study of stroke incidence and cognitive decline in  
11 black and white community dwelling adults  $\geq 45$  years living in the United States stratified to  
12 reflect specific race-sex-geographic strata.<sup>14</sup> Inclusion and exclusion criteria have been  
13 previously described; of note, those with active cancer were excluded from the original study.<sup>14</sup>  
14  
15 Coronary heart disease (CHD) outcomes were ascertained from a REGARDS-MI ancillary study.  
16  
17 Participants were recruited by mail using commercially available lists of U.S. residents, followed  
18 by a computer-assisted telephone interview and subsequent home visit at which time individuals  
19 were consented and enrolled. Between January 2003 and October 2007, 30,239 black and white  
20 adults were enrolled. Of these, 489 (1.6%) were lost to follow-up and 208 (0.7%) were missing  
21 baseline depressive symptom measurements (**Figure 1**). The REGARDS study protocol was  
22 approved by institutional review boards at participating centers.  
23  
24  
25  
26  
27  
28  
29  
30  
31  
32  
33  
34  
35  
36  
37

### 38 *Study Procedures*

39  
40 Baseline data were collected through computer-assisted telephone interviews, an in-home  
41 examination, and self-administered questionnaires. Trained research staff conducted telephone  
42 interviews to collect demographic data, medical history and behavioral risk factors. Following  
43 the telephone interview, individuals had an in-home visit during which physical measurements, a  
44 resting electrocardiogram, medication inventory, phlebotomy and urine were collected. The  
45 median time between the initial phone interview and in-home examination was 28.0  
46  
47  
48  
49  
50  
51  
52  
53  
54 (interquartile range = 21.0) days.  
55  
56  
57  
58  
59  
60

### *Primary Outcomes*

The primary outcomes for these analyses were (1) cancer mortality (all body sites) (2) CVD death defined as death from CHD, stroke, heart failure, sudden cardiac death, vascular pathology, and other CVD causes (3) non-CVD death and (4) all-cause mortality. Living participants or their proxies were followed up every 6 months by telephone with retrieval of medical records for reported hospitalizations or physician visits. Deaths were detected by report of next-of-kin or through online services (e.g., Social Security Death Index) or the National Death Index.<sup>14</sup> Death certificates, medical records, and autopsy reports were obtained to adjudicate cause of death and CVD outcomes.

### *Depressive symptoms*

The primary predictor was baseline depressive symptoms. The 4-item Center for Epidemiologic Studies Depression (CES-D) scale was used to assess the presence of depressive symptoms. This scale asks participants to rate the number of days over the last week in which they had: 1) felt depressed; 2) felt lonely; 3) had crying spells; and 4) felt sad. Response options included <1 day, 1 to 2 days, 3 to 4 days, and 5-7 days (0, 1, 2, 3 points, respectively). Cronbach's  $\alpha$  for the CES-D in the total sample was 0.80. Elevated depressive symptoms were defined as a summed score of  $\geq 4$ .<sup>15</sup> The reliability and validity of the CES-D 4 is similar to the original 20-item instrument.<sup>16</sup>

### *Covariates*

Demographic data included self-reported age, gender, race (black or white), education (less than high school, high school graduate, some college, and college graduate and above), annual income (less than \$20,000, \$20,000-\$34,999, \$35,000-\$74,999, \$75,000 and above), insurance

1 status (yes/no), and stroke region (including the ‘stroke belt’ and ‘stroke buckle’). Clinical risk  
2  
3 factors included (1) diabetes defined as fasting blood glucose  $\geq 126$  or random glucose  $>200$   
4  
5 mL/dL or oral hypoglycemic or insulin use, (2) systolic and diastolic blood pressures based on  
6  
7 the average of two standardized blood pressure measurements (in mm Hg) (3) body mass index  
8  
9 (BMI) based on measured height and weight (4) albumin-to-creatinine ratio (ACR)  
10  
11 (logarithmically-transformed), (5) high-density lipoprotein (HDL)-cholesterol, (6) total  
12  
13 cholesterol, (7) history of CVD: coronary heart disease (self-reported history of myocardial  
14  
15 infarction or coronary revascularization procedure or evidence of myocardial infarction on the  
16  
17 study electrocardiogram), self-reported stroke, peripheral vascular disease, or aneurysm, (8)  
18  
19 cognitive impairment on the 6-item screener of global cognitive function<sup>17,18</sup> (9) chronic lung  
20  
21 disease defined as use of beta-2 adrenergic agonists, leukotriene inhibitors, inhaled  
22  
23 corticosteroids, combination inhalers, or other pulmonary medications such as ipratropium,  
24  
25 cromolyn, aminophylline and theophylline. We also assessed self-reported (yes/no) aspirin,  
26  
27 antidepressant (serotonin and norepinephrine reuptake inhibitors, selective serotonin reuptake  
28  
29 inhibitors, tricyclic antidepressants), statin, and antihypertensive use. Behavioral risk factors  
30  
31 included (1) self-reported pack-years of cigarette smoking; (2) physical activity (“How many  
32  
33 times per week do you engage in intense physical activity, enough to work up a sweat?” with  
34  
35 response options of “none”, “1-3 times per week” and “4 or more times per week”); (3) alcohol  
36  
37 use (“How many alcoholic beverages do you drink?": none, moderate [1 drink per day for  
38  
39 women or 2 drinks per day for men], and heavy [greater than 1 drink per day for women and 2  
40  
41 drinks per day for men]);<sup>14</sup> (4) medication non-adherence assessed with the 4-item Morisky  
42  
43 Medication Adherence Scale ( $\geq 1$ ).<sup>19</sup> Potential physiologic risk factors included high-sensitivity  
44  
45 C-reactive protein, self-reported health status based on the physical component of the 12-item  
46  
47  
48  
49  
50  
51  
52  
53  
54  
55  
56  
57  
58  
59  
60

1 Short-Form Health Survey (SF 12),<sup>20</sup> and perceived stress, measured by the 4-item version of the  
2  
3 Perceived Stress Scale (score of  $\geq 5$  vs.  $<5$ ).<sup>21</sup>  
4  
5  
6  
7

### 8 *Statistical Analyses*

9

10 Baseline characteristics of participants with and without elevated depressive symptoms at  
11  
12 baseline were compared using chi-square tests (for categorical variables), Student t tests (for  
13  
14 continuous variables), and Wilcoxon rank sum tests (for non-normally distributed continuous  
15  
16 measures).  
17  
18  
19  
20

21 Cox proportional hazard regression models were constructed to separately analyze the  
22  
23 association between depressive symptoms ( $\text{CES-D} \geq 4$ ) and cancer death (from all body sites, a  
24  
25 subset of nonCVD death), CVD death, nonCVD death and all-cause death. The end date of  
26  
27 follow-up for this analysis was December 31, 2012. Depressive symptoms were measured on the  
28  
29 CES-D scale: 1) at baseline (initial telephone call), 2) on average five years after baseline  
30  
31 measurement, and 3) on average two years after the second measurement. In the analyses, we  
32  
33 considered depressive symptoms ( $\text{CES-D} \geq 4$  vs.  $<4$ ) as a time-varying exposure, with updates of  
34  
35 exposure at 5-year and 7-year follow-up. Therefore, each participant contributed up to 3  
36  
37 measures of CES-D ( $\geq 4$  vs.  $<4$ ) with a broken-up follow-up time. Follow-up time for each  
38  
39 participant was calculated from the date of the in-home visit to the date of the earliest of: death,  
40  
41 last telephone follow-up, end of follow-up or next CES-D measure. We additionally graphically  
42  
43 plotted unadjusted survival functions for participants with elevated vs. nonelevated depressive  
44  
45 symptoms using the Simon-Makuch method,<sup>22</sup> a modification of the Kaplan-Meier method. In  
46  
47 this context, depression status is treated as a binary time-dependent covariate and study cohorts  
48  
49 are continually updated to contribute to either the  $\text{CES-D} \geq 4$  or  $\text{CES-D} < 4$  groups.  
50  
51  
52  
53  
54  
55  
56  
57  
58  
59  
60

1  
2  
3 Unadjusted hazard ratios and 95% confidence intervals (CI) of mortality endpoints were  
4  
5 estimated for those with vs. without elevated depressive symptoms. Adjusted modeling  
6  
7 proceeded in stages, starting with demographic (Model 1) and traditional CVD risk factors  
8  
9 (Model 2) assessed in prior trials. We then added behavioral (Model 3) and other potential  
10  
11 explanatory (Model 4) factors. We also ran an additional model (Model 5), which considered  
12  
13 intervening first non-fatal stroke and/or myocardial infarction as a time-dependent covariate in  
14  
15 CVD death outcomes. All analyses were conducted overall as well as stratified. We also  
16  
17 conducted a formal test for interaction between depressive symptoms and self-reported health  
18  
19 (defined as excellent or very good vs. good, fair or poor health) in the fully-adjusted models. As  
20  
21 such, all analyses were conducted overall as well as stratified by baseline self-reported health. To  
22  
23 test the proportional hazards assumptions, we performed the chi-squared test for the Schoenfeld  
24  
25 residuals and all the models resulted in a violation of the proportional hazards assumptions,  
26  
27 indicating that time-varying covariates were appropriate. The proportionality assumption for time  
28  
29 varying depressive symptoms was tested by assessing the interaction of depressive  
30  
31 symptoms\*log of follow-up time and was satisfied for all mortality endpoints.  
32  
33  
34  
35  
36

### 37 *Sensitivity Analyses*

38  
39 Sensitivity analyses constructed in parallel to the main analyses examined association of baseline  
40  
41 CES-D measure with mortality endpoints in the sequentially-adjusted Cox proportional hazard  
42  
43 regression models. The end date of follow-up for this analysis was December 31, 2012. Follow-  
44  
45 up time for each participant was calculated from the date of the in-home visit to the date of the  
46  
47 earliest of: death, last telephone follow-up, or end of follow-up.  
48  
49  
50  
51  
52  
53  
54  
55  
56  
57  
58  
59  
60

1 Missing data in covariates were imputed using chained equations and derived by bootstrapping  
2  
3 across the 5 imputed datasets. Of the 29,491 participants, 2768 (9%) were missing income data,  
4  
5 59 (0.2%) health status, 9 (<0.1%) education, 26 (0.1%) health insurance, 1087 (4%) diabetes, 16  
6  
7 (0.1%) aspirin use, 70 (0.2%) statin use, 70 (0.2%) antidepressant use, 333 (1%) anti-  
8  
9 hypertension meds use, 439 (2%) physical activity, 2705 (9%) medication adherence, 213 (0.7%)  
10  
11 BMI, 1254 (4%) cholesterol, 1401 (5%) HDL, 912 (3.1%) pack years, 84 (0.3%) SBP, 1394  
12  
13 (5%) renal function, 381 (1%) QTc, 5681 (19.3%) cognitive status, 4 (<0.1%) stress, 1425 (4%)  
14  
15 SF-12 and 1881 (6%) CRP. Analyses were conducted using SAS software version 9.4 (SAS  
16  
17 Institute, Cary, NC) and STATA version 12 (STATA incorporated, College Station, TX).  
18  
19  
20  
21  
22

## 23 Results

### 24 *Participant Characteristics*

25  
26 Overall, 1.6% were lost to follow-up and 0.7% were missing baseline depressive symptoms,  
27  
28 leaving 29,491 eligible participants (**Figure 1**) of whom 3,254 (11.0%) had elevated depressive  
29  
30 symptoms at baseline (CES-D $\geq$ 4). The average age was 64.9 (9.4) years; 55.1% were female and  
31  
32 41.1% were black, 22.0% had diabetes, 9.2% chronic lung disease, and 23.1% CVD. Nearly 33%  
33  
34 of individuals were physically inactive, 29.2% non-adherent to their medication regimen and  
35  
36 14.5% current smokers. A total of 53.5% of participants self-reported their general health to be  
37  
38 poor, fair, or good compared to 46.5% who reported their health to be excellent or very good, of  
39  
40 whom 16.0% and 5.3% had elevated depressive symptoms, respectively (eTable 1). Regardless  
41  
42 of health status, participants with elevated (vs. non-elevated) depressive symptoms were more  
43  
44 likely to be female, African-American, low income, have more chronic diseases, low physical  
45  
46 health, and more behavioral risk factors (**Table 1A-B**).  
47  
48  
49  
50  
51  
52  
53  
54  
55  
56  
57  
58  
59  
60

**Table 1A. Overall baseline characteristics of REGARDS participants according to baseline depressive symptoms (CES-D)**

| Characteristics                                          | Overall<br>(n=29,491) | CES-D < 4<br>(n=26,817) | CES-D ≥4<br>(n=3,254) | <i>p</i> |
|----------------------------------------------------------|-----------------------|-------------------------|-----------------------|----------|
| <b><i>Socio-demographics</i></b>                         |                       |                         |                       |          |
| Age, <i>M</i> (SD)                                       | 64.9 (9.4)            | 65.1 (9.4)              | 63.2 (9.8)            | <.001    |
| Female, n (%)                                            | 16245 (55.1)          | 13988 (53.3)            | 2257 (69.4)           | <.001    |
| African American, n (%)                                  | 12129 (41.1)          | 10427 (39.7)            | 1702 (52.3)           | <.001    |
| Less than high school education, n (%)                   | 3696 (12.5)           | 2916 (11.1)             | 780 (24.0)            | <.001    |
| Annual household income, n (%)                           |                       |                         |                       |          |
| Less than \$20,000                                       | 5322 (18.0)           | 4148 (15.8)             | 1174 (36.1)           | <.001    |
| No health insurance, n (%)                               | 1926 (6.5)            | 1532 (5.8)              | 394 (12.1)            | <.001    |
| Region, n (%)                                            |                       |                         |                       | <.001    |
| Stroke belt <sup>a</sup>                                 | 10193 (34.6)          | 8973 (34.2)             | 1220 (37.5)           |          |
| Stroke buckle <sup>b</sup>                               | 6188 (21.0)           | 5437 (20.7)             | 751 (23.1)            |          |
| Non-stroke belt or buckle                                | 13110 (44.5)          | 11827 (45.1)            | 1283 (39.4)           |          |
| <b><i>General health and medical conditions</i></b>      |                       |                         |                       |          |
| Self-reported general health, n (%)                      |                       |                         |                       | <.001    |
| Poor, fair, good                                         | 15742 (53.5)          | 13219 (50.5)            | 2523 (77.7)           |          |
| Excellent, very good                                     | 13690 (46.5)          | 12965 (49.5)            | 725 (22.3)            |          |
| Cardiovascular disease, n (%) <sup>c</sup>               | 6825 (23.1)           | 5838 (22.3)             | 987 (30.3)            | <.001    |
| Diabetes, n (%) <sup>d</sup>                             | 6252 (22.0)           | 5305 (21.0)             | 947 (30.2)            | <.001    |
| COPD, n (%)                                              | 2710 (9.2)            | 2307 (8.8)              | 403 (12.4)            | <.001    |
| Physical component score on SF-12 scale, <i>M</i> (SD)   | 46.4 (10.6)           | 47.1 (10.2)             | 40.7 (12.2)           | <.001    |
| <b><i>Physiological risk factors</i></b>                 |                       |                         |                       |          |
| Body Mass Index, kg/m <sup>2</sup> , <i>M</i> (SD)       | 29.3 (6.2)            | 29.2 (6.1)              | 30.6 (7.1)            | <.001    |
| Systolic Blood Pressure, mmHg, <i>M</i> (SD)             | 127.6 (16.7)          | 127.5 (16.5)            | 128.7 (18.1)          | <.001    |
| Total Cholesterol, mg/dL, <i>M</i> (SD)                  | 192.1 (40.1)          | 191.7 (39.8)            | 194.6 (43.0)          | <0.001   |
| High-Density Lipoprotein, mg/dL, <i>M</i> (SD)           | 51.8 (16.2)           | 51.7 (16.2)             | 52.5 (16.3)           | 0.02     |
| QT Interval, corrected for heart rate, ms, <i>M</i> (SD) | 407.5 (23.6)          | 407.2 (23.5)            | 410.0 (24.1)          | <.001    |
| High-Sensitivity C-Reactive Protein, mg/L, median, IQR   | 2.2[1.0-5.0]          | 2.1[0.9-4.8]            | 3.0[1.2-6.9]          | <.001    |
| Albumin to Creatinine Ratio, mg/g, median, IQR           | 7.4[4.7-6.2]          | 7.3[4.6-15.8]           | 8.2[5.1-19.8]         | <.001    |
| <b><i>Medications</i></b>                                |                       |                         |                       |          |
| Antihypertensive medication use, n (%)                   | 15197 (52.1)          | 13290 (51.2)            | 1907 (59.4)           | <.001    |
| Statin use, n (%)                                        | 9295 (31.6)           | 8248 (31.5)             | 1047 (32.3)           | 0.38     |

|    |                                             |              |              |              |        |
|----|---------------------------------------------|--------------|--------------|--------------|--------|
| 1  | Aspirin use, n (%)                          | 12790 (43.4) | 11376 (43.4) | 1414 (43.5)  | 0.91   |
| 2  |                                             |              |              |              |        |
| 3  | Antidepressant use, n (%)                   | 4086 (13.9)  | 3164 (12.1)  | 922 (28.4)   | <.001  |
| 4  | <b>Behavioral risk factors</b>              |              |              |              |        |
| 5  | Self-reported smoking, pack years, <i>M</i> |              |              |              |        |
| 6  | (SD)                                        | 13.5 ( 23.1) | 13.3 ( 22.8) | 15.5 ( 24.9) | <.001  |
| 7  |                                             |              |              |              |        |
| 8  | Current Smoking, n(%)                       | 4263(14.5)   | 3463(13.3)   | 800(24.7)    | <.001  |
| 9  |                                             |              |              |              |        |
| 10 | Alcohol use, n (%)                          |              |              |              | <.001  |
| 11 | Heavy                                       | 1172 (4.1)   | 1043 (4.0)   | 129 (4.1)    |        |
| 12 | Moderate                                    | 9626 (33.3)  | 8786 (34.1)  | 840 (26.6)   |        |
| 13 | None                                        | 18116 (62.7) | 15925 (61.8) | 2191 (69.3)  |        |
| 14 | Physical inactivity, n (%)                  | 10004 (34.4) | 8500 (32.9)  | 1504 (46.9)  | <0.001 |
| 15 |                                             |              |              |              |        |
| 16 | Medication non-adherence, n (%)             | 7959 (29.7)  | 6820 (28.7)  | 1139 (37.8)  | <.001  |
| 17 |                                             |              |              |              |        |
| 18 | Impaired cognitive status                   | 1888 (7.9)   |              |              |        |
| 19 | (Cognitive score $\leq 4$ )                 |              | 1542 (7.3)   | 346 (12.6)   | <.001  |
| 20 | Elevated perceived stress (PSS $\geq 5$ )   | 8591 (29.1)  | 6283 (23.9)  | 2308 (70.9)  | <.001  |

*p* Values from chi square, Student *t* tests. CES-D = Centers for Epidemiology Studies – Depression scale.

CVD = cardiovascular disease. IQR = interquartile range. *M* = mean. SD = standard deviation;

PSS=Perceived stress scale; COPD=Chronic Obstructive Pulmonary Disease

<sup>a</sup>Stroke Belt defined as the states of Alabama, Arkansas, Louisiana, Mississippi, Tennessee and the noncoastal regions within the states of North Carolina, South Carolina and Georgia.

<sup>b</sup>Stroke buckle defined as coastal regions within the states of North Carolina, South Carolina and Georgia.

<sup>c</sup>CVD defined as baseline coronary heart disease, stroke, periphery artery disease or aortic aneurism.

<sup>d</sup>Diabetes defined as fasting blood glucose  $\geq 126$  or random glucose  $>200$  mL/dL or oral hypoglycemic or insulin use.



**Table 1B. Baseline characteristics of REGARDS participants according to baseline depressive symptoms (CES-D) and self-reported health**

| Characteristics                                          | <i>Self-reported general health as "excellent or very good"</i> |                     |          | <i>Self-reported general health as "poor, fair or good"</i> |                      |          |
|----------------------------------------------------------|-----------------------------------------------------------------|---------------------|----------|-------------------------------------------------------------|----------------------|----------|
|                                                          | CES-D < 4<br>(n=12965)                                          | CES-D ≥4<br>(n=725) | <i>p</i> | CES-D < 4<br>(n=13219)                                      | CES-D ≥4<br>(n=2523) | <i>p</i> |
| <b><i>Socio-demographics</i></b>                         |                                                                 |                     |          |                                                             |                      |          |
| Age, <i>M</i> (SD)                                       | 64.8 (9.4)                                                      | 64.5 (10.2)         | 0.47     | 65.5 (9.3)                                                  | 62.8 (9.6)           | <.001    |
| Female, n (%)                                            | 6600 (50.9)                                                     | 501 (69.1)          | <.001    | 7357 (55.7)                                                 | 1751 (69.4)          | <.001    |
| African American, n (%)                                  | 3726 (28.7)                                                     | 295 (40.7)          | <.001    | 6677 (50.5)                                                 | 1404 (55.6)          | <.001    |
| Less than high school education, n (%)                   | 845 (6.5)                                                       | 119 (16.4)          | <.001    | 2059 (15.6)                                                 | 658 (26.1)           | <.001    |
| Annual household income, n (%)                           |                                                                 |                     |          |                                                             |                      |          |
| Less than \$20,000                                       | 1304 (10.1)                                                     | 190 (26.2)          | <.001    | 2832 (21.4)                                                 | 983 (39.0)           | <.001    |
| No health insurance, n (%)                               | 644 (5.0)                                                       | 70 (9.7)            | <.001    | 884 (6.7)                                                   | 324 (12.9)           | <.001    |
| Region, n (%)                                            |                                                                 |                     | 0.37     |                                                             |                      | <.001    |
| Stroke belt <sup>a</sup>                                 | 4282 (33.0)                                                     | 256 (35.3)          |          | 4668 (35.3)                                                 | 963 (38.2)           |          |
| Stroke buckle <sup>b</sup>                               | 2619 (20.2)                                                     | 148 (20.4)          |          | 2807 (21.2)                                                 | 601 (23.8)           |          |
| Non-stroke belt or buckle                                | 6064 (46.8)                                                     | 321 (44.3)          |          | 5744 (43.5)                                                 | 959 (38.0)           |          |
| <b><i>General health and medical conditions</i></b>      |                                                                 |                     |          |                                                             |                      |          |
| Self-reported general health, n (%)                      |                                                                 |                     |          |                                                             |                      |          |
| Poor, fair, good                                         | --                                                              | --                  |          | ---                                                         | --                   |          |
| Excellent, very good                                     | --                                                              | --                  |          | ---                                                         | ---                  |          |
| Cardiovascular disease, n (%) <sup>c</sup>               | 1948 (15.0)                                                     | 144 (19.9)          | 0.004    | 3874 (29.3)                                                 | 840 (33.3)           | <.001    |
| Diabetes, n (%) <sup>d</sup>                             | 1443 (11.6)                                                     | 93 (13.3)           | 0.16     | 3840 (30.2)                                                 | 853 (35.1)           | <.001    |
| COPD, n (%)                                              | 796 (6.2)                                                       | 55 (7.6)            | 0.11     | 1507 (11.4)                                                 | 347 (13.8)           | 0.007    |
| Physical component score on SF-12 scale, <i>M</i> (SD)   | 52.0 (6.5)                                                      | 51.3 (9.1)          | 0.008    | 42.0 (10.7)                                                 | 37.7 (11.3)          | <.001    |
| <b><i>Physiological risk factors</i></b>                 |                                                                 |                     |          |                                                             |                      |          |
| Body Mass Index, kg/m <sup>2</sup> , <i>M</i> (SD)       | 27.8 (5.1)                                                      | 28.4 (5.7)          | 0.006    | 30.5 (6.6)                                                  | 31.2 (7.3)           | <.001    |
| Systolic Blood Pressure, mmHg, <i>M</i> (SD)             | 125.3 (15.7)                                                    | 126.0 (17.2)        | 0.27     | 129.6 (16.9)                                                | 129.5 (18.3)         | 0.91     |
| Total Cholesterol, mg/dL, <i>M</i> (SD)                  | 193.8 (38.2)                                                    | 195.5 (38.6)        | 0.26     | 189.7 (41.2)                                                | 194.4 (44.2)         | <.001    |
| High-Density Lipoprotein, mg/dL, <i>M</i> (SD)           | 53.1 (16.4)                                                     | 55.8 (16.6)         | <.001    | 50.4 (15.8)                                                 | 51.5 (16.1)          | 0.002    |
| QT Interval, corrected for heart rate, ms, <i>M</i> (SD) | 405.6 (22.6)                                                    | 407.2 (23.5)        | 0.06     | 408.7 (24.3)                                                | 410.8 (24.2)         | <0.001   |
| High-Sensitivity C-Reactive Protein, mg/L, median, IQR   | 1.7[0.8-3.8]                                                    | 1.9[0.9-4.9]        | 0.004    | 2.7[1.2-6.1]                                                | 3.4[1.3-7.7]         | <.001    |
| Albumin to Creatinine Ratio, mg/g, median, IQR           | 6.6[4.3-12.3]                                                   | 6.9[4.7-14.0]       | 0.005    | 8.4[5.0-20.7]                                               | 8.7[5.1-22.2]        | 0.18     |
|                                                          | 4916 (38.3)                                                     | 297 (41.7)          | 0.06     | 8344 (63.9)                                                 | 1606 (64.5)          | 0.57     |

**Medications**

|                                                      |              |              |       |              |              |       |
|------------------------------------------------------|--------------|--------------|-------|--------------|--------------|-------|
| Antihypertensive medication use, n (%)               |              |              |       |              |              |       |
| Statin use, n (%)                                    | 3407 (26.4)  | 176 (24.4)   | 0.24  | 4822 (36.5)  | 870 (34.6)   | 0.06  |
| Aspirin use, n (%)                                   | 5254 (40.5)  | 273 (37.7)   | 0.13  | 6100 (46.2)  | 1140 (45.2)  | 0.36  |
|                                                      |              |              |       |              |              | <.001 |
| Antidepressant use, n (%)                            | 1224 (9.5)   | 144 (19.9)   | <.001 | 1933 (14.6)  | 774 (30.8)   |       |
| <b>Behavioral risk factors</b>                       |              |              |       |              |              |       |
| Self-reported smoking, pack years, <i>M</i> (SD)     | 11.2 ( 20.5) | 12.1 ( 21.6) | 0.24  | 15.3 ( 24.7) | 16.5 ( 25.6) | 0.03  |
| Current Smoking, n(%)                                | 1344 (10.4)  | 114 (15.8)   | <.001 | 2110 (16.0)  | 684 (27.2)   | <.001 |
| Alcohol use, n (%)                                   |              |              | 0.01  |              |              | <.001 |
| Heavy                                                | 634 (5.0)    | 38 (5.4)     |       | 409 (3.2)    | 91 (3.7)     |       |
| Moderate                                             | 5034 (39.4)  | 238 (33.8)   |       | 3746 (29.0)  | 600 (24.5)   |       |
| None                                                 | 7103 (55.6)  | 429 (60.9)   |       | 8779 (67.9)  | 1758 (71.8)  |       |
| Physical inactivity, n (%)                           | 3107 (24.3)  | 259 (36.0)   | <.001 | 5372 (41.3)  | 1242 (50.0)  | <.001 |
| Medication non-adherence, n (%)                      | 2997 (26.2)  | 211 (33.1)   | <.001 | 3809 (31.0)  | 926 (39.1)   | <.001 |
| Impaired cognitive status (Cognitive score $\leq$ 4) | 587 (5.6)    | 61 (10.1)    | <.001 | 947 (8.9)    | 285 (13.3)   | <.001 |
| Elevated perceived stress (PSS $\geq$ 5)             | 2219 (17.1)  | 404 (55.7)   | <.001 | 4048 (30.6)  | 1900 (75.3)  | <.001 |

*p* Values from chi square, Student *t* tests. CES-D = Centers for Epidemiology Studies – Depression scale.

CVD = cardiovascular disease. IQR = interquartile range. *M* = mean. SD = standard deviation;

PSS=Perceived stress scale; COPD=Chronic Obstructive Pulmonary Disease

<sup>a</sup>Stroke Belt defined as the states of Alabama, Arkansas, Louisiana, Mississippi, Tennessee and the noncoastal regions within the states of North Carolina, South Carolina and Georgia.

<sup>b</sup>Stroke buckle defined as coastal regions within the states of North Carolina, South Carolina and Georgia.

<sup>c</sup>CVD defined as baseline coronary heart disease, stroke, periphery artery disease or aortic aneurism.

<sup>d</sup>Diabetes defined as fasting blood glucose  $\geq$ 126 or random glucose >200 mL/dL or oral hypoglycemic or insulin use.

**Mortality**

A total of 4,581 (15.5%) participants died during the follow-up period ending in 2012. Of these, 1,551 (33.9%) were attributed to CVD and 3,030 (66.1%) to nonCVD disease death. Of nonCVD deaths, 1,226 (44.3%) were due to cancer death (eTable 2). Overall, there were only 3 cases of mortality due to suicide.

For the time-varying analyses, depressive symptoms were measured at baseline and on average 4.8 years (SD = 1.5) years following the baseline measurement, the third measurement occurring on average 2.1 (SD = 0.4) years after the second measurement (eFigure 1). The mean follow-up time of the second and third measurement of CES-D measures did not differ by self-reported health

(eFigure 2). Of the participants with elevated depressive symptoms at baseline, 39.9% and 36.8% had elevated depressive symptoms at the second and third measures, respectively (eTable 3). Time-varying depressive symptoms significantly predicted nonCVD disease death (aHR 1.29, 95% CI 1.16-1.44) and all-cause mortality (aHR 1.24, 95% CI 1.14-1.36), while approaching significance for cancer death (aHR 1.15, 95% CI 0.96-1.38) and CVD death (aHR 1.13, 95% CI 0.98-1.32), even after adjusting for demographic, clinical, behavioral physiologic factors and time-varying non-fatal CVD events (**Table 2**, eFigure 3). The results appeared to be particularly robust amongst those with excellent or very good self-reported general health: all-cause (aHR=1.48, 95%CI 1.27-1.78), CVD (aHR=1.37, 95%CI 0.99-1.91), nonCVD (aHR=1.54, 95%CI 1.24-1.92) and cancer (aHR=1.36 95% 0.97-1.91) death. In Model 4, the p-values for the depressive symptoms x health status interaction term were 0.005 (all-cause mortality), 0.06 (CVD death), 0.03 (nonCVD death), and 0.20 (cancer death) (**Table 2**).

**Table 2. Association of time-variant elevated depressive symptoms with mortality outcomes.** Each participant contributes to up to 3 time-variant CES-D measures. End of follow-up December 31, 2012.

|                                                                                                                                                                                                                                                                                                                                                                                                                                                                                                                                                                                              | Overall (N=29,491)     | Self-reported general health as "excellent or very good" n=13,711 | Self-reported general health as "poor, fair or good" n=15,780 |
|----------------------------------------------------------------------------------------------------------------------------------------------------------------------------------------------------------------------------------------------------------------------------------------------------------------------------------------------------------------------------------------------------------------------------------------------------------------------------------------------------------------------------------------------------------------------------------------------|------------------------|-------------------------------------------------------------------|---------------------------------------------------------------|
| <b>HR (95%CI) for time-variant categorical CES-D (Score =&gt;4 v. &lt;4)</b>                                                                                                                                                                                                                                                                                                                                                                                                                                                                                                                 |                        |                                                                   |                                                               |
| <b>All-cause mortality</b>                                                                                                                                                                                                                                                                                                                                                                                                                                                                                                                                                                   |                        |                                                                   |                                                               |
| Events, n                                                                                                                                                                                                                                                                                                                                                                                                                                                                                                                                                                                    | 4581                   | 1392                                                              | 3189                                                          |
| Crude                                                                                                                                                                                                                                                                                                                                                                                                                                                                                                                                                                                        | <b>1.66(1.54-1.80)</b> | <b>1.97(1.66-2.33)</b>                                            | <b>1.30(1.19-1.42)</b>                                        |
| Model 1 <sup>a</sup>                                                                                                                                                                                                                                                                                                                                                                                                                                                                                                                                                                         | <b>1.63(1.50-1.76)</b> | <b>1.74(1.46-2.07)</b>                                            | <b>1.42(1.29-1.55)</b>                                        |
| Model 2 <sup>b</sup>                                                                                                                                                                                                                                                                                                                                                                                                                                                                                                                                                                         | <b>1.42(1.31-1.54)</b> | <b>1.60(1.34-1.90)</b>                                            | <b>1.30(1.19-1.43)</b>                                        |
| Model 3 <sup>c</sup>                                                                                                                                                                                                                                                                                                                                                                                                                                                                                                                                                                         | <b>1.38(1.27-1.49)</b> | <b>1.57(1.32-1.87)</b>                                            | <b>1.27(1.16-1.39)</b>                                        |
| Model 4 <sup>d</sup>                                                                                                                                                                                                                                                                                                                                                                                                                                                                                                                                                                         | <b>1.24(1.13-1.35)</b> | <b>1.53(1.27-1.83)</b>                                            | <b>1.16(1.05-1.28)</b>                                        |
| Model 5 <sup>e</sup>                                                                                                                                                                                                                                                                                                                                                                                                                                                                                                                                                                         | <b>1.24(1.14-1.36)</b> | <b>1.48(1.27-1.78)</b>                                            | <b>1.17(1.06-1.30)</b>                                        |
| Model 4 + CES-D x self-reported health                                                                                                                                                                                                                                                                                                                                                                                                                                                                                                                                                       |                        | p-value for the interaction term - <b>0.005</b>                   |                                                               |
| <b>CVD Death</b>                                                                                                                                                                                                                                                                                                                                                                                                                                                                                                                                                                             |                        |                                                                   |                                                               |
| Events, n                                                                                                                                                                                                                                                                                                                                                                                                                                                                                                                                                                                    | 1551                   | 437                                                               | 1114                                                          |
| Crude                                                                                                                                                                                                                                                                                                                                                                                                                                                                                                                                                                                        | <b>1.61(1.41-1.85)</b> | <b>2.01(1.49-2.72)</b>                                            | <b>1.23(1.05-1.43)</b>                                        |
| Model 1 <sup>a</sup>                                                                                                                                                                                                                                                                                                                                                                                                                                                                                                                                                                         | <b>1.58(1.37-1.81)</b> | <b>1.76(1.29-2.40)</b>                                            | <b>1.35(1.15-1.58)</b>                                        |
| Model 2 <sup>b</sup>                                                                                                                                                                                                                                                                                                                                                                                                                                                                                                                                                                         | <b>1.31(1.13-1.51)</b> | <b>1.52(1.12-2.08)</b>                                            | <b>1.20(1.03-1.41)</b>                                        |
| Model 3 <sup>c</sup>                                                                                                                                                                                                                                                                                                                                                                                                                                                                                                                                                                         | <b>1.27(1.10-1.46)</b> | <b>1.53(1.12-2.09)</b>                                            | 1.17(1.00-1.37)                                               |
| Model 4 <sup>d</sup>                                                                                                                                                                                                                                                                                                                                                                                                                                                                                                                                                                         | 1.15(0.98-1.33)        | <b>1.47(1.07-2.04)</b>                                            | 1.06(0.90-1.26)                                               |
| Model 5 <sup>e</sup>                                                                                                                                                                                                                                                                                                                                                                                                                                                                                                                                                                         | 1.13(0.98-1.32)        | 1.37(0.99-1.91) p=0.06                                            | 1.07(0.90-1.27)                                               |
| Model 4 + CES-D x self-reported health                                                                                                                                                                                                                                                                                                                                                                                                                                                                                                                                                       |                        | p-value for the interaction term - <b>0.06</b>                    |                                                               |
| <b>NonCVD Death</b>                                                                                                                                                                                                                                                                                                                                                                                                                                                                                                                                                                          |                        |                                                                   |                                                               |
| Events, n                                                                                                                                                                                                                                                                                                                                                                                                                                                                                                                                                                                    | 3030                   | 955                                                               | 2075                                                          |
| Crude                                                                                                                                                                                                                                                                                                                                                                                                                                                                                                                                                                                        | <b>1.69(1.53-1.86)</b> | <b>1.95(1.58-2.39)</b>                                            | <b>1.34(1.20-1.50)</b>                                        |
| Model 1 <sup>a</sup>                                                                                                                                                                                                                                                                                                                                                                                                                                                                                                                                                                         | <b>1.65(1.50-1.83)</b> | <b>1.73(1.40-2.14)</b>                                            | <b>1.45(1.30-1.63)</b>                                        |
| Model 2 <sup>b</sup>                                                                                                                                                                                                                                                                                                                                                                                                                                                                                                                                                                         | <b>1.48(1.34-1.64)</b> | <b>1.63(1.32-2.02)</b>                                            | <b>1.35(1.23-1.51)</b>                                        |
| Model 3 <sup>c</sup>                                                                                                                                                                                                                                                                                                                                                                                                                                                                                                                                                                         | <b>1.44(1.30-1.59)</b> | <b>1.59(1.29-1.97)</b>                                            | <b>1.33(1.18-1.49)</b>                                        |
| Model 4 <sup>d</sup>                                                                                                                                                                                                                                                                                                                                                                                                                                                                                                                                                                         | <b>1.30(1.17-1.48)</b> | <b>1.58(1.27-2.24)</b>                                            | <b>1.22(1.08-1.38)</b>                                        |
| Model 5 + intervening non-fatal CVD event <sup>e</sup>                                                                                                                                                                                                                                                                                                                                                                                                                                                                                                                                       | <b>1.29(1.16-1.44)</b> | <b>1.54(1.24-1.92)</b>                                            | <b>1.22(1.08-1.38)</b>                                        |
| Model 4 + CES-D x self-reported health                                                                                                                                                                                                                                                                                                                                                                                                                                                                                                                                                       |                        | p-value for the interaction term - <b>0.03</b>                    |                                                               |
| <b>Cancer Death (a subset of nonCVD death)</b>                                                                                                                                                                                                                                                                                                                                                                                                                                                                                                                                               |                        |                                                                   |                                                               |
| Events, n                                                                                                                                                                                                                                                                                                                                                                                                                                                                                                                                                                                    | 1226                   | 475                                                               | 751                                                           |
| Crude                                                                                                                                                                                                                                                                                                                                                                                                                                                                                                                                                                                        | <b>1.27(1.09-1.53)</b> | <b>1.53(1.11-2.12)</b>                                            | 1.06(0.87-1.29)                                               |
| Model 1 <sup>a</sup>                                                                                                                                                                                                                                                                                                                                                                                                                                                                                                                                                                         | <b>1.29(1.09-1.53)</b> | <b>1.45(1.04-2.01)</b>                                            | 1.16(0.95-1.42)                                               |
| Model 2 <sup>b</sup>                                                                                                                                                                                                                                                                                                                                                                                                                                                                                                                                                                         | <b>1.25(1.05-1.48)</b> | <b>1.40(1.01-1.95)</b>                                            | 1.14(0.93-1.40)                                               |
| Model 3 <sup>c</sup>                                                                                                                                                                                                                                                                                                                                                                                                                                                                                                                                                                         | <b>1.20(1.01-1.43)</b> | 1.35(0.97-1.88)                                                   | 1.11(0.91-1.36)                                               |
| Model 4 <sup>d</sup>                                                                                                                                                                                                                                                                                                                                                                                                                                                                                                                                                                         | 1.16(0.96-1.39)        | 1.37(0.97-1.92)                                                   | 1.08(0.87-1.33)                                               |
| Model 5 + intervening non-fatal CVD event <sup>e</sup>                                                                                                                                                                                                                                                                                                                                                                                                                                                                                                                                       | 1.15(0.96-1.38)        | 1.36(0.97-1.91)                                                   | 1.08(0.90-1.34)                                               |
| Model 4 + CES-D x self-reported health                                                                                                                                                                                                                                                                                                                                                                                                                                                                                                                                                       |                        | p-value for the interaction term - 0.20                           |                                                               |
| <sup>a</sup> Model 1 adjusts for <i>socio-demographics</i> (age, gender, region, income, health insurance, education)<br><sup>b</sup> Model 2 adds to model 1 <i>medical conditions, physiological factors and medication use</i> (systolic blood pressure, total cholesterol, high density lipoprotein-cholesterol, use of aspirin, statins, antihypertensives, antidepressants, body mass index, logarithmically transformed Albumin to Creatinine Ratio; diabetes, cardiovascular disease, medication use as a proxy for chronic obstructive pulmonary disease, and cognitive impairment) |                        |                                                                   |                                                               |

<sup>c</sup>Model 3 adds to model 2 *behavioral risk factors* (pack-years of cigarette smoking, self-reported alcohol use, physical inactivity, medication non-adherence).

<sup>d</sup>Model 4 adds to model 3 *other factors* (physical health component score of SF-12, log-transformed high sensitivity C-reactive protein and perceived stress)

<sup>e</sup>Model 5 adds non-fatal CVD event – first nonfatal myocardial infarction or stroke since baseline.

HR = hazard ratio; CVD cardiovascular disease; CES-D = Centers for Epidemiology Studies-Depression

**Bold p-value < 0.05**; Missing data in covariates imputed using chained equations.

### *Sensitivity Analyses:*

The mean follow-up time was 6.5 (SD = 2.3) years, with a median [interquartile range] of 6.9 [5.4-8.3] years. Baseline depressive symptoms were significantly associated with all-cause mortality (aHR 1.18, 95%CI 1.07-1.29) and nonCVD death (aHR 1.21, 95%CI 1.08-1.36) and approached significance for CVD death (aHR 1.10, 95%CI 0.94-1.29) and cancer death (aHR 1.12, 95%CI 0.93-1.36), even in the exploratory models (Model 3). The results appeared to be particularly robust amongst those with excellent or very good health: cancer death (aHR 1.49, 95%CI 1.03-2.13), CVD death (aHR 1.63, 95%CI 1.16-2.30), nonCVD death (aHR 1.48, 95%CI 1.15-1.89) and all-cause mortality (aHR 1.53, 95% CI 1.25-1.88). In Model 4, the p values for depressive symptoms x health status interaction term was 0.003 (all-cause mortality), 0.01 (CVD death), 0.06 (nonCVD death), and 0.07 (cancer death). Results were similar without multiple imputations within 2 decimal places

**(Table 3)**

**Table 3. Association of baseline elevated depressive symptoms (CES-D $\geq$ 4) with mortality outcomes. Each participant contributes 1 measure of CES-D at baseline.**

|                                                    | Overall<br>n=29,491    | Self-reported general<br>health as "excellent or<br>very good"<br>n=13,711 | Self-reported general health<br>as "poor, fair or good"<br>n=15,780 |
|----------------------------------------------------|------------------------|----------------------------------------------------------------------------|---------------------------------------------------------------------|
|                                                    | HR (95%CI)             | HR (95%CI)                                                                 | HR (95%CI)                                                          |
| <b>All-cause mortality</b>                         | <b>4581</b>            | <b>1392</b>                                                                | <b>3189</b>                                                         |
| Crude                                              | <b>1.54(1.42-1.68)</b> | <b>1.91(1.59-2.31)</b>                                                     | <b>1.18(1.07-1.30)</b>                                              |
| Model 1 <sup>a</sup>                               | <b>1.57(1.44-1.72)</b> | <b>1.76(1.45-2.12)</b>                                                     | <b>1.34(1.21-1.47)</b>                                              |
| Model 2 <sup>b</sup>                               | <b>1.32(1.25-1.49)</b> | <b>1.61(1.33-1.96)</b>                                                     | <b>1.22(1.11-1.35)</b>                                              |
| Model 3 <sup>c</sup>                               | <b>1.32(1.27-1.44)</b> | <b>1.56(1.29-1.90)</b>                                                     | <b>1.20(1.09-1.32)</b>                                              |
| Model 4 <sup>d</sup>                               | <b>1.18(1.07-1.29)</b> | <b>1.53(1.25-1.88)</b>                                                     | 1.09(0.98-1.20)                                                     |
| Model 4 + baseline CES-D<br>x self-reported health |                        |                                                                            | p-value for the interaction term - <b>0.002</b>                     |
| <b>CVD Death</b>                                   | <b>1551</b>            | <b>437</b>                                                                 | <b>1114</b>                                                         |
| Crude                                              | <b>1.55(1.34-1.78)</b> | <b>2.16(1.58-2.96)</b>                                                     | <b>1.13(0.97-1.33)</b>                                              |
| Model 1 <sup>a</sup>                               | <b>1.57(1.35-1.81)</b> | <b>1.96(1.42-2.71)</b>                                                     | <b>1.29(1.10-1.52)</b>                                              |
| Model 2 <sup>b</sup>                               | <b>1.28(1.10-1.48)</b> | <b>1.71(1.23-2.38)</b>                                                     | 1.14(0.97-1.34)                                                     |
| Model 3 <sup>c</sup>                               | <b>1.24(1.07-1.44)</b> | <b>1.70(1.22-2.36)</b>                                                     | 1.11(0.94-1.31)                                                     |
| Model 4 <sup>d</sup>                               | 1.10(0.94-1.29)        | <b>1.63(1.16-2.30)</b>                                                     | 1.00(0.84-1.20)                                                     |
| Model 4 + baseline CES-D<br>x self-reported health |                        |                                                                            | p-value for the interaction term - <b>0.01</b>                      |
| <b>NonCVD Death</b>                                | <b>3030</b>            | <b>955</b>                                                                 | <b>2075</b>                                                         |
| Crude                                              | <b>1.54(1.39-1.71)</b> | <b>1.80(1.42-2.26)</b>                                                     | <b>1.21(1.08-1.35)</b>                                              |
| Model 1 <sup>a</sup>                               | <b>1.57(1.42-1.75)</b> | <b>1.66(1.31-2.10)</b>                                                     | <b>1.36(1.21-1.53)</b>                                              |
| Model 2 <sup>b</sup>                               | <b>1.41(1.26-1.56)</b> | <b>1.56(1.29-1.98)</b>                                                     | <b>1.27(1.13-1.43)</b>                                              |
| Model 3 <sup>c</sup>                               | <b>1.36(1.22-1.51)</b> | <b>1.49(1.17-1.90)</b>                                                     | <b>1.25(1.11-1.41)</b>                                              |
| Model 4 <sup>d</sup>                               | <b>1.21(1.08-1.36)</b> | <b>1.48(1.15-1.89)</b>                                                     | <b>1.14(1.00-1.29)</b>                                              |
| Model 4 + baseline CES-D<br>x self-reported health |                        |                                                                            | p-value for the interaction term - <b>0.06</b>                      |
| <b>Cancer Death (a subset of<br/>nonCVD death)</b> | <b>1226</b>            | <b>475</b>                                                                 | <b>751</b>                                                          |
| Crude                                              | <b>1.21(1.02-1.44)</b> | <b>1.63(1.16-2.30)</b>                                                     | 0.97(0.79-1.19)                                                     |
| Model 1 <sup>a</sup>                               | <b>1.27(1.06-1.52)</b> | <b>1.58(1.12-2.23)</b>                                                     | 1.09(0.89-1.35)                                                     |
| Model 2 <sup>b</sup>                               | <b>1.22(1.02-1.47)</b> | <b>1.53(1.08-2.17)</b>                                                     | 1.07(0.87-1.33)                                                     |
| Model 3 <sup>c</sup>                               | 1.17(0.98-1.41)        | <b>1.45(1.02-2.05)</b>                                                     | 1.05(0.85-1.30)                                                     |
| Model 4 <sup>d</sup>                               | 1.12(0.93-1.36)        | <b>1.49(1.03-2.13)</b>                                                     | 1.01(0.81-1.27)                                                     |
| Model 4 + baseline CES-D<br>x self-reported health |                        |                                                                            | p-value for the interaction term - <b>0.07</b>                      |

<sup>a</sup>Model 1 adjusts for *socio-demographics* (age, gender, region, income, health insurance, education)  
<sup>b</sup>Model 2 adds to model 1 *medical conditions, physiological factors and medication use* (systolic blood pressure, total cholesterol, high density lipoprotein-cholesterol, use of aspirin, statins, antihypertensives, antidepressants, body mass index, logarithmically transformed Albumin to Creatinine Ratio; diabetes, cardiovascular disease, medication use as a proxy for chronic obstructive pulmonary disease, and cognitive impairment)  
<sup>c</sup>Model 3 adds to model 2 *behavioral risk factors* (pack-years of cigarette smoking, self-reported alcohol use, physical inactivity, medication non-adherence).  
<sup>d</sup>Model 4 adds to model 3 *other factors* (physical health component score of SF-12, log-transformed high sensitivity C-reactive protein and perceived stress)

HR = hazard ratio, CVD cardiovascular disease

---

HR and 95% CI were estimated by Cox proportional hazard regression models. Bold p-value < 0.05; Missing data in covariates imputed using chained equations.

---

## Discussion

To our knowledge, this is the largest study to date to examine the timing of the relationship between depressive symptoms and all-cause and cause-specific mortality in non-institutionalized middle to older aged adults. In this diverse cohort, we found that time-varying depressive symptoms significantly increased the risk of nonCVD and all-cause mortality in fully adjusted models. In fully adjusted models, depressive symptoms increased the risk of cause-specific and all-cause mortality by 36% to 54% in those with a very good/excellent state of health.

Given that depression is a relapsing/remitting disease,<sup>23</sup> this study markedly adds to the literature by demonstrating a time-varying relationship between elevated depressive symptoms and mortality, including cancer death. Major study strengths include the use of 3 measurements of depressive symptoms and stringent physician adjudication of outcomes. We are also the first to report a significant moderating effect of self-reported health on the relationship between depressive symptoms and mortality. Many have long asked whether depression leads to mortality or whether individuals are depressed because they are dying. Our findings in those who report excellent states of health is striking and supports the former argument. It may also be that the effect of chronic illness burden on mortality in those with poor health overwhelms the effects of depressive



1 symptoms. Those with excellent health may also fail to recognize/present for depression. In fact,  
2 depressed excellent health individuals in our cohort were less likely to be on an antidepressant.  
3  
4 Nonetheless, this finding should be further explored in future studies.  
5  
6  
7  
8  
9

10 The results have a coherence consistent with prior studies that suggest that depressive symptoms  
11 don't solely predict suicide and CVD mortality, but also predict other causes such as cancer death.<sup>24</sup>  
12  
13 While prior literature suggests that depressive symptoms confer mortality in those with active  
14 cancer,<sup>25</sup> our study excluded active cancer diagnoses confirming a possible relationship between  
15 depressive symptoms and incident cancer mortality. Prior studies have also been limited by  
16 inadequate covariate control, and our results for cancer persisted after adjusting for numerous  
17 traditional and behavioral risk factors, such as smoking, and approached significance even in  
18 models that included physiologic factors. We were, however, unable to adjust for other time-  
19 varying covariates. For example, prior research suggests that changes in physical health (e.g.,  
20 number of debilitating conditions) over time mediates the relationship between depressive  
21 symptoms and mortality.<sup>26</sup>  
22  
23  
24  
25  
26  
27  
28  
29  
30  
31  
32  
33  
34  
35  
36  
37

38 This study also supports comprehensive evidence-based depression care management in primary  
39 care practices, which have been shown to lower mortality risk.<sup>27</sup> Nonetheless, depression treatment  
40 remains suboptimal in the general population,<sup>28</sup> despite decades of efforts. We too demonstrate that  
41 over time, nearly 40% of patients with elevated depressive symptoms at baseline were still  
42 depressed on average 5 and 7 years later. Given the potentially shorter follow-up times in both  
43 time-varying analyses (by virtue of follow-up times being broken up by repeat depression  
44 measures) and baseline analyses (with 6.5 years of follow-up on average), these findings lend  
45  
46  
47  
48  
49  
50  
51  
52  
53  
54  
55  
56  
57  
58  
59  
60



1 greater urgency to the importance of timely and effective treatment of depressive symptoms to  
2 prevent adverse consequences of depressive symptoms on physical health and mortality.  
3  
4

5  
6 Limitations of our study include the regional specificity, limiting generalizability, and use of the  
7 short form of the CES-D, which measures only emotional and not somatic symptoms of depression.  
8  
9 Schultz (2002) demonstrated variance between studies using scales and interviews,<sup>29</sup> and others  
10 have posited even stronger findings in studies with clinical diagnoses (vs. continuous measures).<sup>30</sup>  
11  
12 However, CES-D scales are one of the most widely used scales in clinical practice and in baseline  
13 depression to outcome studies and have good sensitivity and specificity.<sup>9,15,16</sup> We may also have  
14 been underpowered to examine CVD and cancer mortality, though the directionality of the  
15 estimates remained consistent. The exclusion of active cancer participants as part of the overall  
16 REGARDS study criteria, the rationale of which has previously been described,<sup>14</sup> may also have  
17 contributed to lack of power. Those with a *history* of malignancy or CVD were not specifically  
18 excluded, which is in line with prior depression to mortality studies.<sup>1,9</sup> Nonetheless, our previously  
19 published study, which excluded those with a history of CVD, similarly found a strong relationship  
20 between time-varying depressive symptoms and CVD death.<sup>31</sup>  
21  
22  
23  
24  
25  
26  
27  
28  
29  
30  
31  
32  
33  
34  
35  
36  
37  
38

39 We were also unable to adjust for other psychiatric comorbidities, such as anxiety (though we  
40 included stress) or account for subclinical CVD and/or cancer. In addition, the follow-up time (6.5  
41 years) was relatively short compared to other studies with even shorter follow-up times between  
42 CES-D measures in time-varying analyses, suggesting a short-term effect on mortality. Our results  
43 support prior literature suggesting that shorter follow-up time is associated with greater excess  
44 mortality.<sup>9,30</sup> However, we did not formally compare short-term to long-term follow-up nor  
45 persistent to fluctuating depressive symptoms.  
46  
47  
48  
49  
50  
51  
52  
53  
54  
55  
56  
57  
58  
59  
60

1 Given our results of a relationship between time-varying depressive symptoms and mortality,  
2 further research is warranted to test the long-term efficacy of and adherence to depression treatment  
3 and to explore preventive approaches to decreasing premature mortality risk.<sup>32</sup> To our knowledge,  
4 the finding of a relationship between depressive symptoms and mortality in those with excellent or  
5 very good self-reported health is a new finding and should be further studied.  
6  
7  
8  
9  
10  
11  
12  
13

## 14 References

- 15  
16  
17  
18 1. Wulsin LR, Vaillant GE, Wells VE. A systematic review of the mortality of depression.  
19  
20 *Psychosom Med.* 1999;61:6-17.
- 21  
22  
23 2. Sullivan MD, O'Connor P, Feeney P, et al. Depression Predicts All-Cause Mortality:  
24  
25 Epidemiological evaluation from the ACCORD HRQL substudy. *Diabetes Care.*  
26  
27 2012;35:1708-1715.
- 28  
29  
30 3. Review: depression after myocardial infarction is associated with increased risk of all-cause  
31  
32 mortality and cardiovascular events. *Evidence Based Mental Health.* 2013;16:110.
- 33  
34  
35 4. Barth J, Schumacher M, Herrmann-Lingen C. Depression as a risk factor for mortality in  
36  
37 patients with coronary heart disease: a meta-analysis. *Psychosom Med.* 2004;66:802-813.
- 38  
39  
40 5. Cuijpers P, Vogelzangs N, Twisk J, et al. Comprehensive meta-analysis of excess mortality  
41  
42 in depression in the general community versus patients with specific illnesses. *Am J*  
43  
44 *Psychiatry.* 2014;171:453-462.
- 45  
46  
47 6. Cuijpers P, Smit F. Excess mortality in depression: a meta-analysis of community studies. *J*  
48  
49 *Affect Disord.* 72:227-236.
- 50  
51  
52 7. Bruce ML, Leaf PJ, Rozal GP, Florio L, Hoff RA. Psychiatric status and 9-year mortality  
53  
54 data in the New Haven Epidemiologic Catchment Area Study. *Am J Psychiatry.*  
55  
56 1994;151:716-721.

- 1       **8.**     Surtees PG, Wainwright NW, Luben RN, et al. Depression and ischemic heart disease  
2       mortality: evidence from the EPIC-Norfolk United Kingdom prospective cohort study. *Am J*  
3       *Psychiatry*. 2008;165:515-523.  
4  
5  
6
- 7       **9.**     Pinquart M, Duberstein PR. Depression and cancer mortality: a meta-analysis.  
8       *Psychological medicine*. 2010;40:1797-1810.  
9
- 10       **10.**    Mols F, Husson O, Roukema JA, van de Poll-Franse LV. Depressive symptoms are a risk  
11       factor for all-cause mortality: results from a prospective population-based study among  
12       3,080 cancer survivors from the PROFILES registry. *J Cancer Surviv*. 2013;7:484-492.  
13  
14
- 15       **11.**    Lasserre AM, Marti-Soler H, Strippoli MP, et al. Clinical and course characteristics of  
16       depression and all-cause mortality: A prospective population-based study. *J Affect Disord*.  
17       2016;189:17-24.  
18  
19
- 20       **12.**    McGee DL, Liao Y, Cao G, Cooper RS. Self-reported Health Status and Mortality in a  
21       Multiethnic US Cohort. *Am J Epidemiol*. 1999;149:41-46.  
22  
23
- 24       **13.**    Ambresin G, Chondros P, Dowrick C, Herrman H, Gunn JM. Self-Rated Health and Long-  
25       Term Prognosis of Depression. *Annals of Family Medicine*. 2014;12:57-65.  
26  
27
- 28       **14.**    Howard VJ, Cushman M, Pulley L, et al. The reasons for geographic and racial differences  
29       in stroke study: objectives and design. *Neuroepidemiology*. 2005;25:135-143.  
30  
31
- 32       **15.**    Melchior LA, Huba GJ, Brown VB, Reback CJ. A Short Depression Index for Women.  
33       *Educational and Psychological Measurement*. 1993;53:1117-1125.  
34  
35
- 36       **16.**    Radloff LS. The ces-d scale: A self-report depression scale for research in the general  
37       population. . *Appl Psychol Meas*. 1977;1:385-401.  
38  
39
- 40       **17.**    Folstein MF, Folstein SE, McHugh PR. "Mini-mental state". A practical method for grading  
41       the cognitive state of patients for the clinician. *J Psychiatr Res*. 1975;12:189-198.  
42  
43  
44  
45  
46  
47  
48  
49  
50  
51  
52  
53  
54  
55  
56  
57  
58  
59  
60

- 1 **18.** Callahan CM, Unverzagt FW, Hui SL, Perkins AJ, Hendrie HC. Six-item screener to  
2 identify cognitive impairment among potential subjects for clinical research. *Med Care*.  
3 2002;40:771-781.  
4  
5  
6
- 7 **19.** Morisky DE, Green LW, Levine DM. Concurrent and predictive validity of a self-reported  
8 measure of medication adherence. *Med Care*. 1986;24:67-74.  
9
- 10 **20.** Ware J, Jr., Kosinski M, Keller SD. A 12-Item Short-Form Health Survey: construction of  
11 scales and preliminary tests of reliability and validity. *Med Care*. 1996;34:220-233.  
12  
13
- 14 **21.** Cohen S, Kamarck T, Mermelstein R. A global measure of perceived stress. *J Health Soc*  
15 *Behav*. 1983;24:385-396.  
16  
17
- 18 **22.** Simon R, Makuch RW. A non-parametric graphical representation of the relationship  
19 between survival and the occurrence of an event: Application to responder versus non-  
20 responder bias. *Statistics in Medicine*. 1984;3:35-44.  
21  
22
- 23 **23.** Lin EH, Katon WJ, VonKorff M, et al. Relapse of depression in primary care. Rate and  
24 clinical predictors. *Arch Fam Med*. 1998;7:443-449.  
25  
26
- 27 **24.** Mykletun A, Bjerkeset O, Dewey M, et al. Anxiety, depression, and cause-specific  
28 mortality: the HUNT study. *Psychosom Med*. 2007;69:323-331.  
29  
30
- 31 **25.** Satin JR, Linden W, Phillips MJ. Depression as a predictor of disease progression and  
32 mortality in cancer patients: a meta-analysis. *Cancer*. 2009;115:5349-5361.  
33  
34
- 35 **26.** Houle JN. Depressive symptoms and all-cause mortality in a nationally representative  
36 longitudinal study with time-varying covariates. *Psychosom Med*. 2013;75:297-304.  
37  
38
- 39 **27.** Gallo JJ, Morales KH, Bogner HR, et al. Long term effect of depression care management  
40 on mortality in older adults: follow-up of cluster randomized clinical trial in primary care.  
41 *BMJ*. 2013;346:f2570.  
42  
43  
44  
45  
46  
47  
48  
49  
50  
51  
52  
53  
54  
55  
56  
57  
58  
59  
60

- 1       **28.**    González HM, Vega WA, Williams DR, et al. Depression care in the united states: Too little  
2            for too few. *Arch Gen Psychiatry*. 2010;67:37-46.  
3  
4
- 5        **29.**    Schulz R, Drayer RA, Rollman BL. Depression as a risk factor for non-suicide mortality in  
6            the elderly. *Biol Psychiatry*. 2002;52:205-225.  
7  
8
- 9        **30.**    Pan A, Sun Q, Okereke OI, Rexrode KM, Hu FB. Depression and risk of stroke morbidity  
10           and mortality: a meta-analysis and systematic review. *JAMA*. 2011;306:1241-1249.  
11  
12
- 13       **31.**    Moise N, Khodneva Y, Richman J, et al. Elucidating the Association Between Depressive  
14           Symptoms, Coronary Heart Disease, and Stroke in Black and White Adults: The REasons  
15           for Geographic And Racial Differences in Stroke (REGARDS) Study. *J Am Heart Assoc*.  
16           2016;5.  
17  
18  
19  
20  
21  
22  
23
- 24       **32.**    Kuyken W, Warren FC, Taylor RS, et al. Efficacy of Mindfulness-Based Cognitive Therapy  
25           in Prevention of Depressive Relapse: An Individual Patient Data Meta-analysis From  
26           Randomized Trials. *JAMA Psychiatry*. 2016;73:565-574.  
27  
28  
29  
30  
31  
32  
33  
34  
35  
36  
37  
38  
39  
40  
41  
42  
43  
44  
45  
46  
47  
48  
49  
50  
51  
52  
53  
54  
55  
56  
57  
58  
59  
60

## ACKNOWLEDGEMENTS

**Funding:** This research project is supported by a cooperative agreement U01 NS041588 from the National Institute of Neurological Disorders and Stroke, National Institutes of Health, Department of Health and Human Service. The REGARDS study was supported by NIH grant 2U01NS041588; REGARDS-MI study was supported by NIH grants R01 HL080477 and K24 HL111154. The content is solely the responsibility of the authors and does not necessarily represent the official views of the National Institute of Neurological Disorders and Stroke or the National Institutes of Health. Representatives of the funding agency have been involved in the review of the manuscript but not directly involved in the collection, management, analysis, or interpretation of the data. The authors thank the other investigators, the staff, and the participants of the REGARDS study for their valuable contributions. A full list of participating REGARDS investigators and institutions can be found at <http://www.regardsstudy.org>. This work was also supported by funds from NHLBI (3 R01 HL114924-03S1; HL080477; and K24 HL111154).

**Disclosures:** All authors have completed the ICMJE uniform disclosure form at [www.icmje.org/coi\\_disclosure.pdf](http://www.icmje.org/coi_disclosure.pdf) and declare: no support from any organisation for the submitted work; no financial relationships with any organisations that might have an interest in the submitted work in the previous three years; no other relationships or activities that could appear to have influenced the submitted work.

**Author Contributions:** Drs. Yulia Khodneva and Joshua Richman had full access to all the data in the study and take responsibility for the integrity of the data and the accuracy of the data analysis. *Study concept and design:* Moise, Khodneva, Safford; *Acquisition of data:* Khodneva, Safford; *Analysis and interpretation of data:* Khodneva, Moise, Jannat-Khah, Richman, Kronish, Shaffer, Safford; *Drafting of the manuscript:* Moise, Khodneva *Critical revision of manuscript for important intellectual content:* Moise, Khodneva, Jannat-Khah, Richman, Kronish, Davidson,

1 Shaffer, Safford; *Statistical analysis*: Khodneva, Jannat-Khah; *Obtained funding*: Safford; *Study*  
2  
3 *supervision*: Safford  
4

5 **Conflict of Interest:** None  
6  
7

8  
9 **Copyright:** The Corresponding Author has the right to grant on behalf of all authors and does grant  
10 on behalf of all authors, a worldwide licence to the Publishers and its licensees in perpetuity, in all  
11 forms, formats and media (whether known now or created in the future), to i) publish, reproduce,  
12 distribute, display and store the Contribution, ii) translate the Contribution into other languages,  
13 create adaptations, reprints, include within collections and create summaries, extracts and/or,  
14 abstracts of the Contribution, iii) create any other derivative work(s) based on the Contribution, iv)  
15 to exploit all subsidiary rights in the Contribution, v) the inclusion of electronic links from the  
16 Contribution to third party material where-ever it may be located; and, vi) licence any third party to  
17 do any or all of the above.  
18  
19

20 **Transparency:** Dr. Moise affirms that the manuscript is an honest, accurate, and transparent  
21 account of the study being reported; that no important aspects of the study have been omitted; and  
22 that any discrepancies from the study as planned (and, if relevant, registered) have been explained.  
23  
24

25 **Data Sharing:** Patient level data or full dataset or technical appendix or statistical code are  
26 available if deemed important by reviewers with open access by Monika Safford at Weill Cornell,  
27 Nathalie Moise at Columbia University Medical Center, and Yulia Khodneva at University of  
28 Alabama at Birmingham. Patient consent was not obtained but the presented data are anonymised  
29 and risk of identification is low.  
30  
31  
32  
33  
34  
35  
36  
37  
38  
39  
40  
41  
42  
43  
44  
45  
46  
47  
48  
49  
50  
51  
52  
53  
54  
55  
56  
57  
58  
59  
60

## Figure Legend

**Figure 1.** Cohort Flow Diagram: Exclusion cascade of depressive symptoms to mortality endpoints analysis.

For peer review only



1  
2  
3  
4  
5  
6  
7  
8  
9  
10  
11  
12  
13  
14  
15  
16  
17  
18  
19  
20  
21  
22  
23  
24  
25  
26  
27  
28  
29  
30  
31  
32  
33  
34  
35  
36  
37  
38  
39  
40  
41  
42  
43  
44  
45  
46  
47  
48  
49  
50  
51  
52  
53  
54  
55  
56  
57  
58  
59  
60

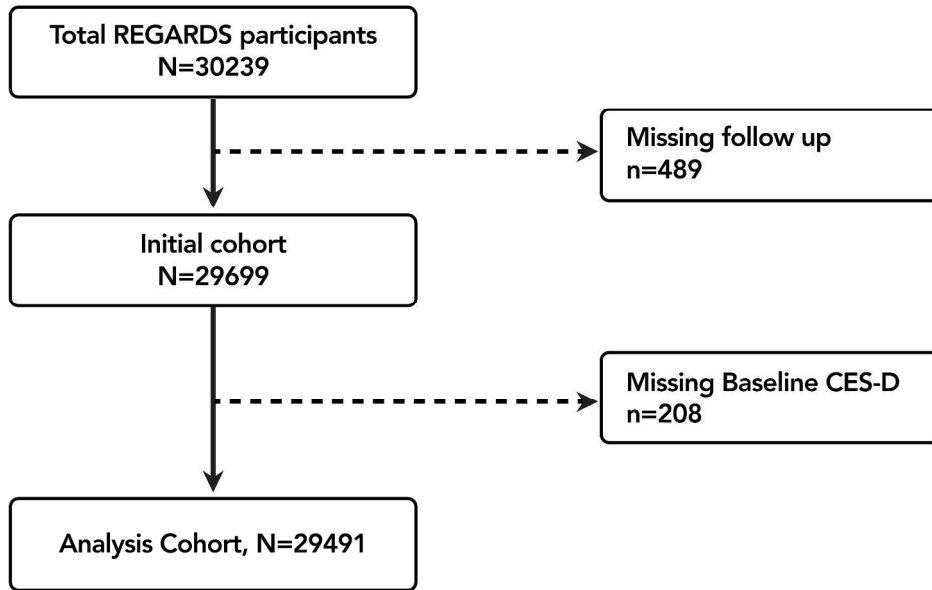

Figure 1. Consort Diagram

279x215mm (300 x 300 DPI)

www only

## Supplementary Material

eTable 1. Proportion of persons with elevated depressive symptoms by baseline self-reported health status (original categories, without collapsing).

| Self-reported general health | Baseline                      |               |          | Second CES-D                    |               |          | Third CES-D                      |               |          |
|------------------------------|-------------------------------|---------------|----------|---------------------------------|---------------|----------|----------------------------------|---------------|----------|
|                              | CES-D<4, n, %                 | CES-D≥4, n, % | Total, n | CESD<4, n, %                    | CES-D≥4, n, % | Total, n | CESD<4, n, %                     | CES-D≥4, n, % | Total, n |
| <b>Excellent</b>             | 4515<br>95.9 %                | 195<br>4.1%   | 4710     | 3444<br>94.7%                   | 194<br>5.3%   | 3638     | 2109<br>94.6%                    | 120<br>5.4%   | 2229     |
| <b>Very good</b>             | 8450<br>94.1%                 | 530<br>5.9%   | 8980     | 6332<br>93.0%                   | 478<br>7.0%   | 6810     | 3938<br>92.8%                    | 305<br>7.2%   | 4243     |
| <b>Good</b>                  | 9181<br>89.1%                 | 1124<br>10.9% | 10305    | 6363<br>88.6%                   | 818<br>11.4%  | 7181     | 3717<br>88.9%                    | 464<br>11.1%  | 4181     |
| <b>Fair</b>                  | 3424<br>77.8 %                | 975<br>22.2 % | 4399     | 2185<br>79.7%                   | 556<br>20.3%  | 2741     | 1236<br>82.0%                    | 271<br>18.0%  | 1507     |
| <b>Poor</b>                  | 614<br>59.2%                  | 424<br>40.9%  | 1038     | 322<br>61.2%                    | 204<br>38.8%  | 526      | 177<br>65.3%                     | 94<br>34.7%   | 271      |
|                              |                               |               | 29432    |                                 |               | 20896    |                                  |               | 12431    |
|                              | <b>Frequency Missing = 59</b> |               |          | <b>Frequency Missing = 8595</b> |               |          | <b>Frequency Missing = 17060</b> |               |          |

**eTable 2. Reasons for non-cardiovascular disease death in the REGARDS study**

| <i>Causes of Death</i>            | Overall |         | Self-reported general health as “excellent or very good”<br>n=13,711 |         | Self-reported general health as “poor, fair or good”<br>n=15,780 |         |
|-----------------------------------|---------|---------|----------------------------------------------------------------------|---------|------------------------------------------------------------------|---------|
|                                   | n       | Percent | Frequency                                                            | Percent | Frequency                                                        | Percent |
| Cancer                            | 1226    | 44.3    | 474                                                                  | 54.0    | 747                                                              | 39.7    |
| Accidents/Injury/Suicide/Homicide | 164     | 5.9     | 52                                                                   | 5.9     | 111                                                              | 5.9     |
| Suicide                           | 3       | 0.1     | 2                                                                    | 0.2     | 1                                                                | 0.05    |
| Liver disease                     | 56      | 2.0     | 14                                                                   | 1.6     | 42                                                               | 2.2     |
| Infection                         | 498     | 18.0    | 132                                                                  | 15.0    | 365                                                              | 19.4    |
| ESRD                              | 119     | 4.3     | 23                                                                   | 2.6     | 95                                                               | 5.1     |
| Dementia                          | 187     | 6.8     | 74                                                                   | 8.4     | 112                                                              | 6.0     |
| COPD                              | 247     | 8.9     | 43                                                                   | 4.9     | 204                                                              | 10.9    |
| Pulmonary Embolism                | 38      | 1.34    | 11                                                                   | 1.3     | 27                                                               | 1.4     |
| Other                             | 232     | 8.4     | 55                                                                   | 6.3     | 177                                                              | 9.4     |

Frequency Missing = 263

Frequency Missing = 272

**eFigure 1. Percent of participants with depression measured at baseline who had their second and third follow up measured by years of follow up.**

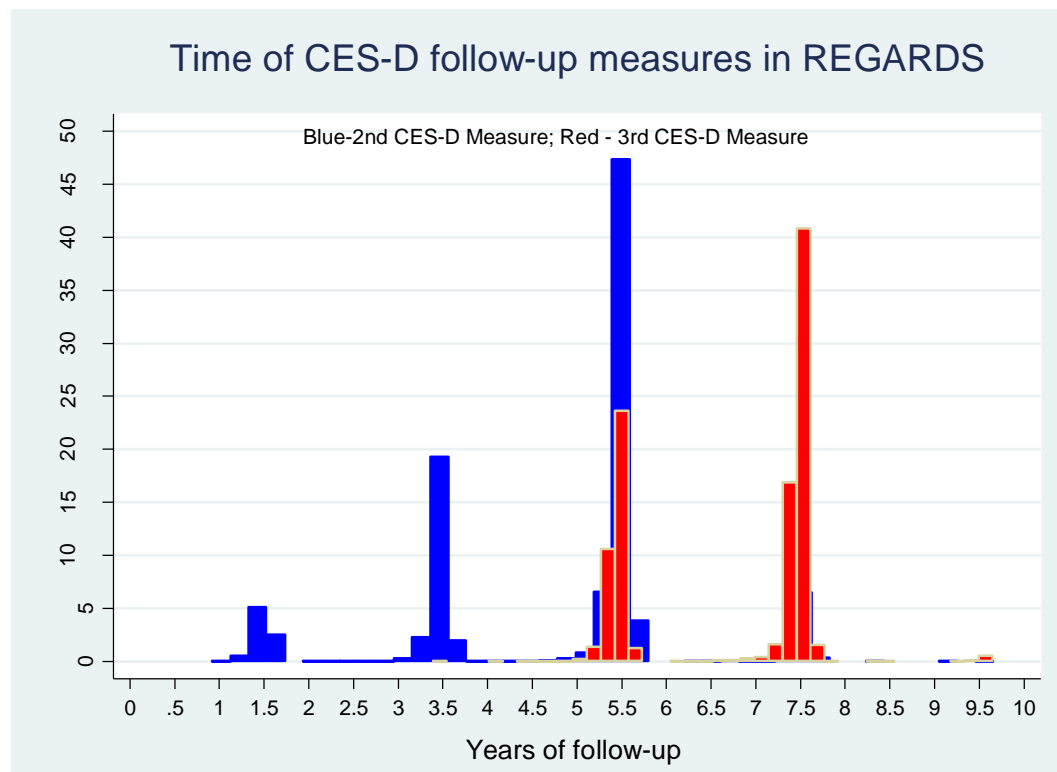

\*"Percent" is a proportion of participants reporting CES-D scores at certain times of all participants available for either 2<sup>nd</sup> follow-up (blue) or 3<sup>rd</sup> follow-up (red).

Time since preceding measurement (baseline or second follow-up), years

|              | Participants, n | Mean | SD  | Minimum | Maximum |
|--------------|-----------------|------|-----|---------|---------|
| Second CES-D | 20934           | 4.8  | 1.5 | 0.9     | 9.7     |
| Third CES-D  | 12451           | 2.1  | 0.4 | 1.0     | 4.2     |

eFigure 2. Timing of CES-D follow up measures in REGARDS by self reported health at baseline.

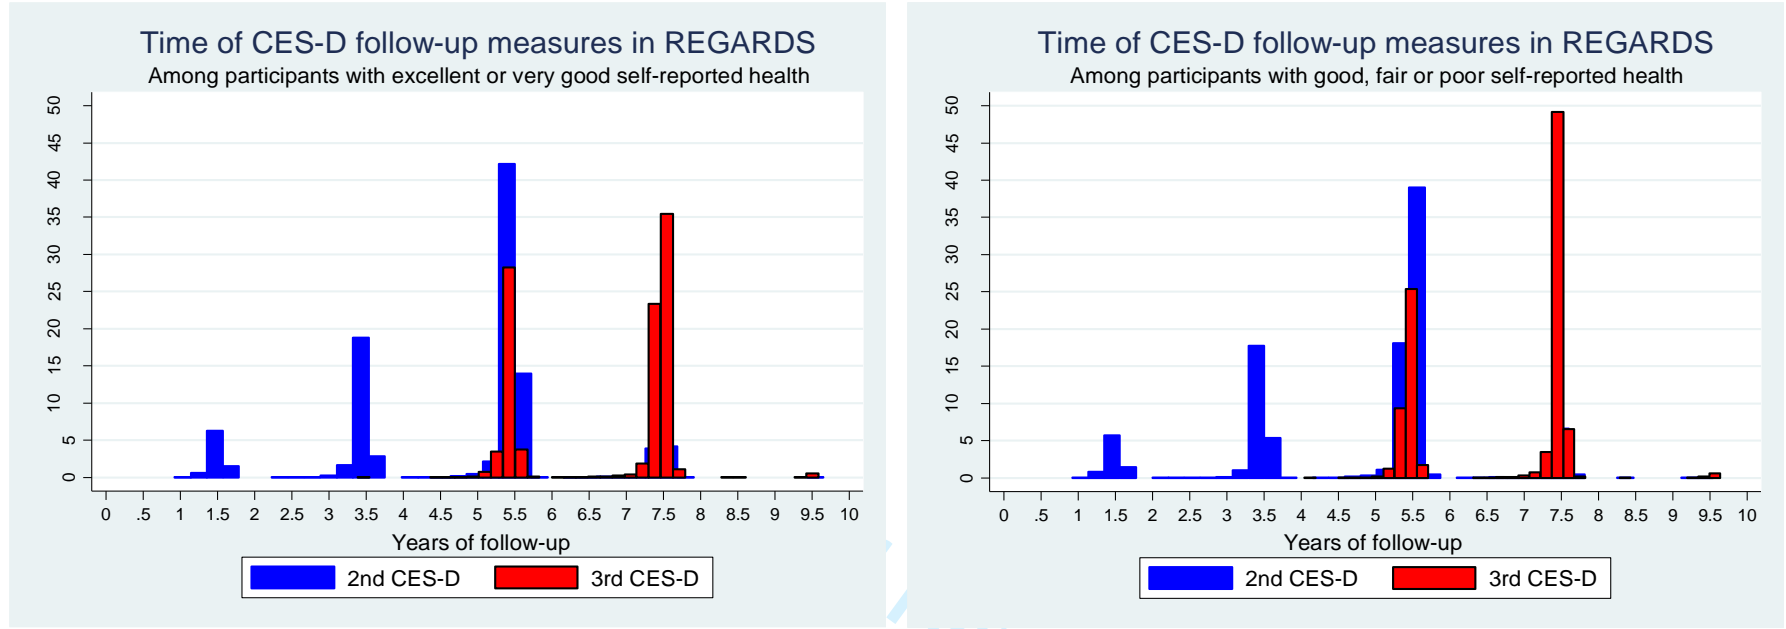

\*"Percent" is a proportion of participants reporting CES-D scores at certain times, of all participants available for either 2<sup>nd</sup> follow-up (blue) or 3<sup>rd</sup> follow-up (red).

| Self-reported general health as "excellent or very good" |       |                                                                              |     |         |         | Self-reported general health as "poor, fair or good" |                                                                              |     |         |         |
|----------------------------------------------------------|-------|------------------------------------------------------------------------------|-----|---------|---------|------------------------------------------------------|------------------------------------------------------------------------------|-----|---------|---------|
|                                                          |       | Time since preceding CES-D measurement (baseline or second follow-up), years |     |         |         |                                                      | Time since preceding CES-D measurement (baseline or second follow-up), years |     |         |         |
|                                                          | N     | Mean                                                                         | SD  | Minimum | Maximum | N                                                    | Mean                                                                         | SD  | Minimum | Maximum |
| Second CES-D                                             | 10448 | 4.8                                                                          | 1.5 | 0.9     | 9.7     | 10448                                                | 4.8                                                                          | 1.5 | 0.9     | 9.5     |
| Third CES-D                                              | 6472  | 2.1                                                                          | 0.4 | 1.7     | 4.2     | 5959                                                 | 2.1                                                                          | 0.5 | 1.0     | 4.2     |

**eTable 3. Baseline characteristics of REGARDS participants who had all 3 CES-D measures vs. those with 1 or 2 CES-D measures**

| Characteristics                                          | 1 or 2 CES-D measures<br>(n=17,040) | All 3 CES-D measures<br>(n=12, 451) | <i>p</i> value |
|----------------------------------------------------------|-------------------------------------|-------------------------------------|----------------|
| <b><i>Socio-demographics</i></b>                         |                                     |                                     |                |
| Age, <i>M</i> (SD)                                       | 65.0 +- 10.0                        | 64.7 +- 8.5                         | 0.0069         |
| Female, n (%)                                            | 9300 (54.6)                         | 6945 (55.8)                         | 0.04           |
| African American, n (%)                                  | 7709 (45.2)                         | 4420 (35.5)                         | <.001          |
| Less than high school education, n (%)                   | 2583 (15.2)                         | 1113 (8.9)                          | <.001          |
| Annual Household Income, n (%)                           |                                     |                                     | <.001          |
| Less than \$20,000                                       | 3549 (20.8)                         | 1773 (14.2)                         |                |
| No Health Insurance, n (%)                               | 1290 (7.6)                          | 636 (5.1)                           | <.001          |
| Region, n (%)                                            |                                     |                                     | <.001          |
| Stroke belt                                              | 5806 (34.1)                         | 4387 (35.2)                         |                |
| Stroke buckle                                            | 3887 (22.8)                         | 2301 (18.5)                         |                |
| Non-stroke belt or buckle                                | 7347 (43.1)                         | 5763 (46.3)                         |                |
| <b><i>General health and medical conditions</i></b>      |                                     |                                     |                |
| Self-reported general health, n (%)                      |                                     |                                     | <.001          |
| Poor, fair, good                                         | 9783 (57.5)                         | 5959 (47.9)                         |                |
| Excellent, very good                                     | 7218 (42.5)                         | 6472 (52.1)                         |                |
| Cardiovascular disease (CHD, stroke, PAD, AA), n (%)     | 4379 (25.7)                         | 2446 (19.6)                         | <.001          |
| Diabetes, n (%)                                          | 4083 (25.0)                         | 2169 (18.0)                         | <.001          |
| COPD, n (%)                                              | 1612 (9.5)                          | 1098 (8.8)                          | 0.05           |
| Physical component score on SF-12 scale, <i>M</i> (SD)   | 45.5 +- 11.0                        | 47.6 +- 9.9                         | <.001          |
| <b><i>Physiological risk factors</i></b>                 |                                     |                                     |                |
| Body Mass Index, kg/m <sup>2</sup> , <i>M</i> (SD)       | 29.4 +- 6.3                         | 29.2 +- 6.0                         | 0.0024         |
| Systolic Blood Pressure, mmHg, <i>M</i> (SD)             | 128.0 +- 17.2                       | 127.0 +- 15.9                       | <.001          |
| Total Cholesterol, mg/dL, <i>M</i> (SD)                  | 192.2 +- 41.0                       | 191.9 +- 39.0                       | 0.5732         |
| High-Density Lipoprotein, mg/dL, <i>M</i> (SD)           | 51.4 +- 16.1                        | 52.4 +- 16.3                        | <.001          |
| QT Interval, corrected for heart rate, ms, <i>M</i> (SD) | 408.4 +- 24.2                       | 406.3 +- 22.7                       | <.001          |
| High-Sensitivity C-Reactive Protein, mg/L, median, IQR   | 2.3[1.0-5.4]                        | 2.1[0.9-4.7]                        | <.001          |

|    |                                                      |               |               |       |
|----|------------------------------------------------------|---------------|---------------|-------|
| 1  | Albumin to Creatinine Ratio, mg/g, median,           |               |               |       |
| 2  | IQR                                                  | 7.9[4.8-18.7] | 6.9[4.5-13.5] | <.001 |
| 3  | <b>Medications</b>                                   |               |               |       |
| 4  | Antihypertensive medication use, n (%)               | 9079 (53.9)   | 6118 (49.7)   | <.001 |
| 5  | Statin use, n (%)                                    | 5344 (31.4)   | 3951 (31.8)   | 0.53  |
| 6  | Aspirin use, n (%)                                   | 7297 (42.8)   | 5493 (44.1)   | 0.03  |
| 7  | Antidepressant use, n (%)                            | 2440 (14.4)   | 1646 (13.2)   | 0.006 |
| 8  | <b>Behavioral risk factors</b>                       |               |               |       |
| 9  |                                                      |               |               |       |
| 10 | Self-reported smoking, pack years, <i>M</i> (SD)     | 14.5 +- 24.4  | 12.2 +- 21.0  | <.001 |
| 11 | Current Smoking, n(%)                                | 2786 (16.4)   | 1477 (11.9)   | <.001 |
| 12 | Alcohol use, n (%)                                   |               |               | <.001 |
| 13 | Heavy                                                | 652 (3.9)     | 520 (4.2)     |       |
| 14 | Moderate                                             | 5180 (31.1)   | 4446 (36.3)   |       |
| 15 | None                                                 | 10822 (65.0)  | 7294 (59.5)   |       |
| 16 | Physical inactivity, n (%)                           | 6150 (36.7)   | 3854 (31.3)   | <.001 |
| 17 | Medication non-adherence, n (%)                      | 4548 (29.6)   | 3411 (29.9)   | 0.59  |
| 18 | Impaired cognitive status (Cognitive score $\leq$ 4) | 1300 (9.4)    | 588 (5.9)     | <.001 |
| 19 | Elevated perceived stress (PSS $\geq$ 5)             | 5437 (31.9)   | 3154 (25.3)   | <.001 |

22 *p* Values from chi square, Student t tests. CES-D = Centers for Epidemiology Studies – Depression scale. CVD =  
 23 cardiovascular disease. IQR = interquartile range. *M* = mean. SD = standard deviation.  
 24 Stroke Belt defined as the states of Alabama, Arkansas, Louisiana, Mississippi, Tennessee and the noncoastal regions  
 25 within the states of North Carolina, South Carolina and Georgia. Stroke buckle defined as coastal regions within the states  
 26 of North Carolina, South Carolina and Georgia.  
 27 Diabetes defined as fasting blood glucose  $\geq$ 126 or random glucose  $>$ 200 mL/dL or oral hypoglycemic or insulin use. CVD  
 28 defined as baseline coronary heart disease, stroke, periphery artery disease or aortic aneurism.  
 29  
 30  
 31  
 32  
 33  
 34  
 35  
 36  
 37  
 38  
 39  
 40  
 41  
 42  
 43  
 44  
 45  
 46  
 47

eFigure 3. Simon and Makuch plots of time-varying depressive symptoms and all-cause mortality, cardiovascular disease death, noncardiovascular disease death and cancer death.

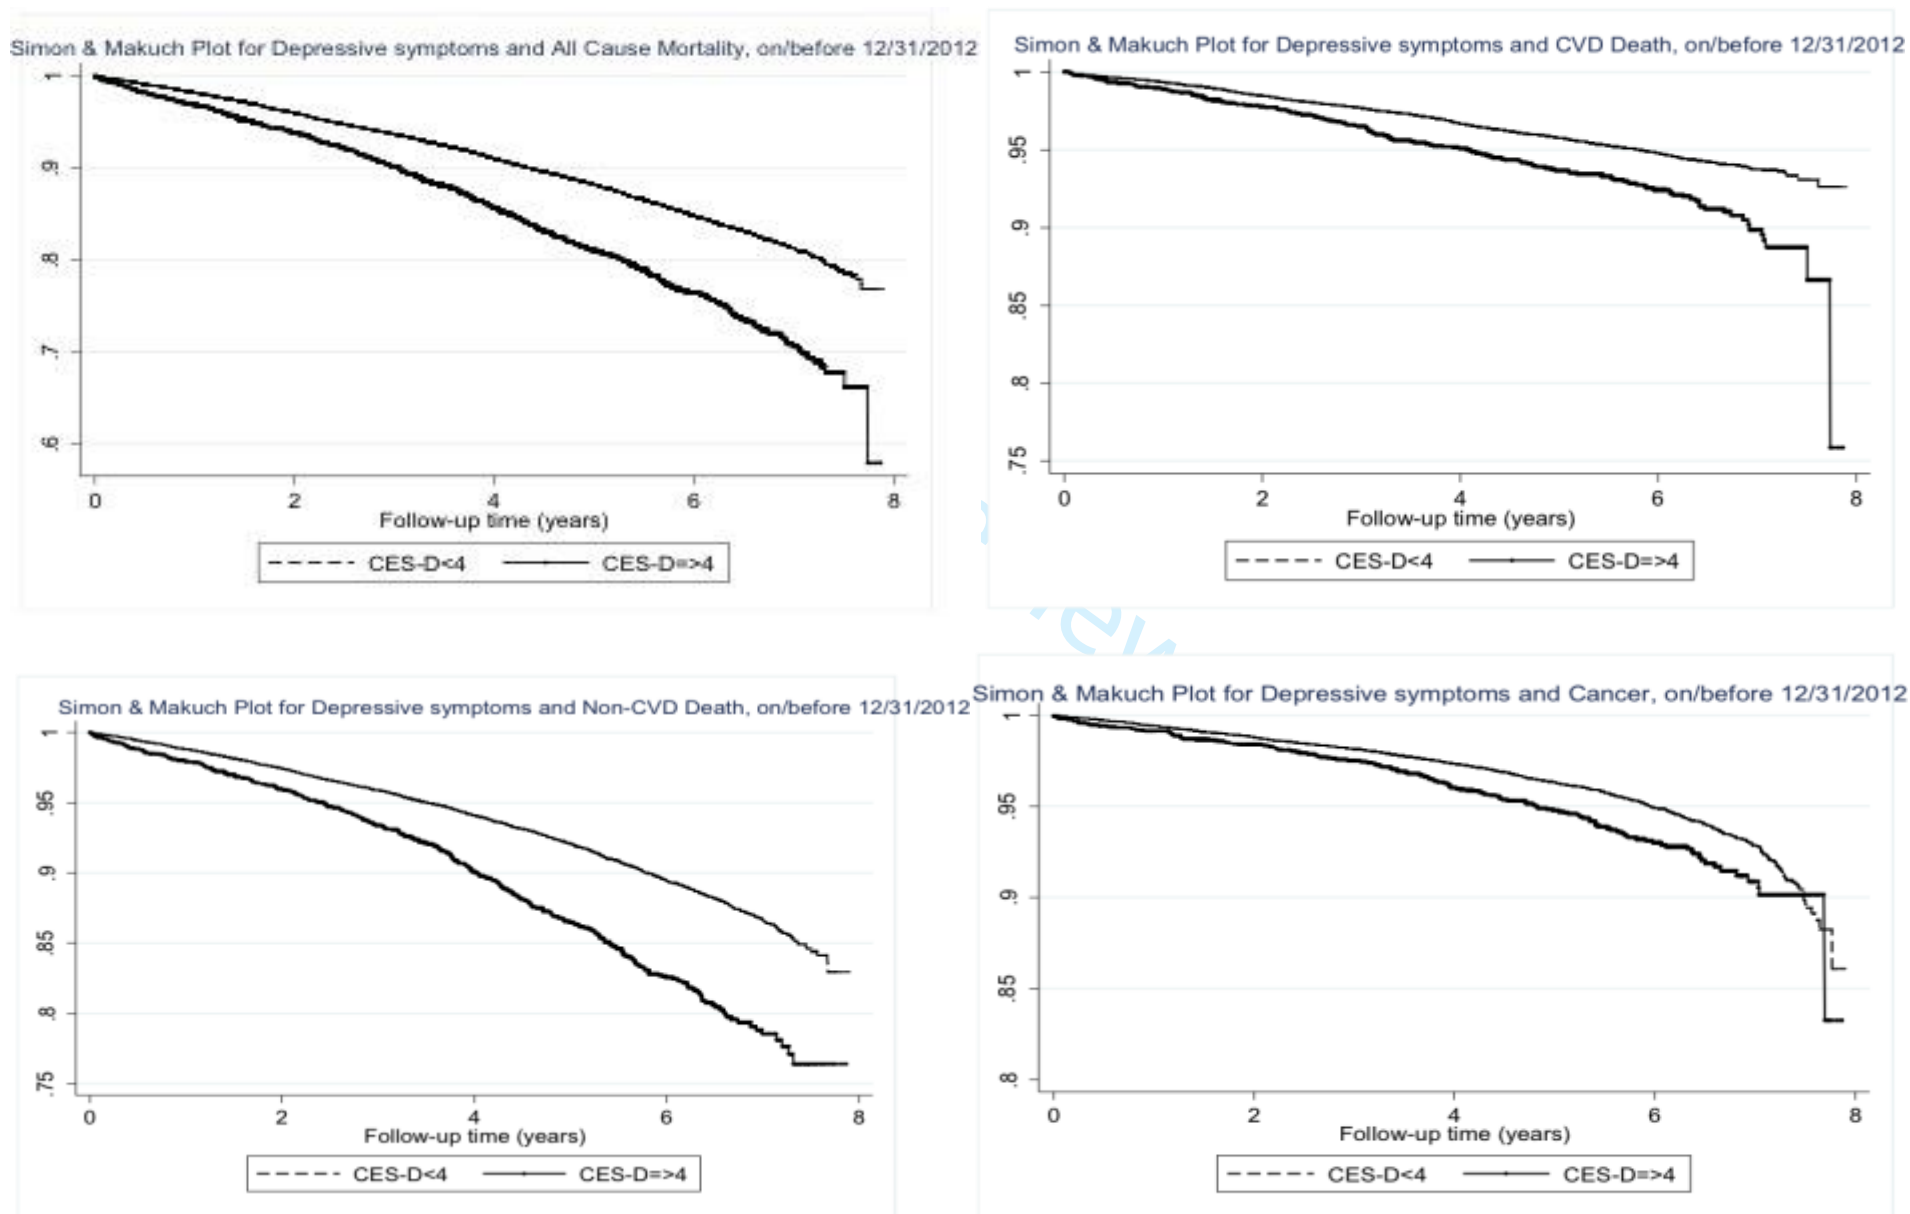



STROBE Statement—Checklist of items that should be included in reports of *cohort studies*

|                           | Item No/Page #    | Recommendation                                                                                                                                                                 |
|---------------------------|-------------------|--------------------------------------------------------------------------------------------------------------------------------------------------------------------------------|
| <b>Title and abstract</b> | 1 (page 1-3)      | (a) Indicate the study's design with a commonly used term in the title or the <b>abstract</b>                                                                                  |
|                           | (Page 2-3)        | (b) Provide in the abstract an informative and balanced summary of what was done and what was found                                                                            |
| <b>Introduction</b>       |                   |                                                                                                                                                                                |
| Background/rationale      | 2 (Page 4)        | Explain the scientific background and rationale for the investigation being reported                                                                                           |
| Objectives                | 3 (pages 4-5)     | State specific objectives, including any prespecified hypotheses                                                                                                               |
| <b>Methods</b>            |                   |                                                                                                                                                                                |
| Study design              | 4 (Page 5 and 6)  | Present key elements of study design early in the paper                                                                                                                        |
| Setting                   | 5 (page 5-10),    | Describe the setting, locations, and relevant dates, including periods of recruitment, exposure, follow-up, and data collection                                                |
| Participants              | 6 (page 5-6, 8-9) | (a) Give the eligibility criteria, and the sources and methods of selection of participants. Describe methods of follow-up                                                     |
|                           | n/a               | (b) For matched studies, give matching criteria and number of exposed and unexposed                                                                                            |
| Variables                 | 7 (page 6-8)      | Clearly define all outcomes, exposures, predictors, potential confounders, and effect modifiers. Give diagnostic criteria, if applicable                                       |
| Data sources/ measurement | 8 (pages 6-9)     | For each variable of interest, give sources of data and details of methods of assessment (measurement). Describe comparability of assessment methods if there is more than one |

|                        |                 |                                                                                                                                                                                                   |
|------------------------|-----------------|---------------------------------------------------------------------------------------------------------------------------------------------------------------------------------------------------|
|                        |                 | group                                                                                                                                                                                             |
| Bias                   | 9 (page 8-10)   | Describe any efforts to address potential sources of bias                                                                                                                                         |
| Study size             | 10 (page 10)    | Explain how the study size was arrived at                                                                                                                                                         |
| Quantitative variables | 11 (page 6-10)  | Explain how quantitative variables were handled in the analyses. If applicable, describe which groupings were chosen and why                                                                      |
| Statistical methods    | 12 (page 8-10)  | (a) Describe all statistical methods, including those used to control for confounding                                                                                                             |
|                        | Pages 9         | (b) Describe any methods used to examine subgroups and interactions                                                                                                                               |
|                        | Page 10         | (c) Explain how missing data were addressed                                                                                                                                                       |
|                        | Page 9          | (d) If applicable, explain how loss to follow-up was addressed                                                                                                                                    |
|                        | Page 9-10       | (e) Describe any sensitivity analyses                                                                                                                                                             |
| <b>Results</b>         |                 |                                                                                                                                                                                                   |
| Participants           | 13 (page 10)    | (a) Report numbers of individuals at each stage of study—eg numbers potentially eligible, examined for eligibility, confirmed eligible, included in the study, completing follow-up, and analysed |
|                        | Page 10         | (b) Give reasons for non-participation at each stage                                                                                                                                              |
|                        | Figure 1        | (c) Consider use of a flow diagram                                                                                                                                                                |
| Descriptive data       | 14 (page 10-11) | (a) Give characteristics of study participants (eg demographic, clinical, social) and information on exposures and potential confounders                                                          |
|                        | Page 10         | (b) Indicate number of participants with missing data for each variable of interest                                                                                                               |
|                        | Pages 12        | (c) Summarise follow-up time (eg, average and total amount)                                                                                                                                       |

|                          |                  |                                                                                                                                                                                                              |
|--------------------------|------------------|--------------------------------------------------------------------------------------------------------------------------------------------------------------------------------------------------------------|
| Outcome data             | 15 (page 11)     | Report numbers of outcome events or summary measures over time                                                                                                                                               |
| Main results             | 16 (pages 11-12) | (a) Give unadjusted estimates and, if applicable, confounder-adjusted estimates and their precision (eg, 95% confidence interval). Make clear which confounders were adjusted for and why they were included |
|                          | Page 7-8, 23-27  | (b) Report category boundaries when continuous variables were categorized                                                                                                                                    |
|                          | n/a              | (c) If relevant, consider translating estimates of relative risk into absolute risk for a meaningful time period                                                                                             |
| Other analyses           | 17 (pages 12)    | Report other analyses done—eg analyses of subgroups and interactions, and sensitivity analyses                                                                                                               |
| <b>Discussion</b>        |                  |                                                                                                                                                                                                              |
| Key results              | 18 (page 12)     | Summarise key results with reference to study objectives                                                                                                                                                     |
| Limitations              | 19 (pages 14-15) | Discuss limitations of the study, taking into account sources of potential bias or imprecision. Discuss both direction and magnitude of any potential bias                                                   |
| Interpretation           | 20 (page 12-13)  | Give a cautious overall interpretation of results considering objectives, limitations, multiplicity of analyses, results from similar studies, and other relevant evidence                                   |
| Generalisability         | 21 (page 14)     | Discuss the generalisability (external validity) of the study results                                                                                                                                        |
| <b>Other information</b> |                  |                                                                                                                                                                                                              |
| Funding                  | 22 (page 20)     | Give the source of funding and the role of the funders for the present study and, if applicable, for the original study on which the present                                                                 |

|  |                  |
|--|------------------|
|  | article is based |
|--|------------------|

\*Give information separately for exposed and unexposed groups.

**Note:** An Explanation and Elaboration article discusses each checklist item and gives methodological background and published examples of transparent reporting. The STROBE checklist is best used in conjunction with this article (freely available on the Web sites of PLoS Medicine at <http://www.plosmedicine.org/>, Annals of Internal Medicine at <http://www.annals.org/>, and Epidemiology at <http://www.epidem.com/>). Information on the STROBE Initiative is available at <http://www.strobe-statement.org>.

For peer review only

# BMJ Open

## An observational study of the differential impact of time-varying depressive symptoms on all-cause and cause-specific mortality by health status in community dwelling adults: The REGARDS study

|                                 |                                                                                                                                                                                                                                                                                                                                                                                                                                                                                                                                                                                                                                               |
|---------------------------------|-----------------------------------------------------------------------------------------------------------------------------------------------------------------------------------------------------------------------------------------------------------------------------------------------------------------------------------------------------------------------------------------------------------------------------------------------------------------------------------------------------------------------------------------------------------------------------------------------------------------------------------------------|
| Journal:                        | <i>BMJ Open</i>                                                                                                                                                                                                                                                                                                                                                                                                                                                                                                                                                                                                                               |
| Manuscript ID                   | bmjopen-2017-017385.R2                                                                                                                                                                                                                                                                                                                                                                                                                                                                                                                                                                                                                        |
| Article Type:                   | Research                                                                                                                                                                                                                                                                                                                                                                                                                                                                                                                                                                                                                                      |
| Date Submitted by the Author:   | 28-Sep-2017                                                                                                                                                                                                                                                                                                                                                                                                                                                                                                                                                                                                                                   |
| Complete List of Authors:       | Moise, Nathalie; Columbia University Medical Center, Center for Behavioral Cardiovascular Health<br>Khodneva, Yulia; University of Alabama School of Medicine<br>Jannat-Khah, Deanna; NewYork-Presbyterian Hospital/Weill Cornell Medical Center<br>Richman, Joshua; University of Alabama School of Medicine<br>Davidson, Karina; Columbia University Medical Center, Medicine<br>Kronish, Ian M. ; Columbia University Medical Center, Center Behavioral Cardiovascular Health<br>Shaffer, Jonathan; University of Colorado Denver Department of Psychology<br>Safford, Monika; Cornell University Joan and Sanford I Weill Medical College |
| <b>Primary Subject Heading</b>: | Mental health                                                                                                                                                                                                                                                                                                                                                                                                                                                                                                                                                                                                                                 |
| Secondary Subject Heading:      | Mental health                                                                                                                                                                                                                                                                                                                                                                                                                                                                                                                                                                                                                                 |
| Keywords:                       | mortality, health status, Depression & mood disorders < PSYCHIATRY                                                                                                                                                                                                                                                                                                                                                                                                                                                                                                                                                                            |
|                                 |                                                                                                                                                                                                                                                                                                                                                                                                                                                                                                                                                                                                                                               |

SCHOLARONE™  
Manuscripts

1 **An observational study of the differential impact of time-varying depressive symptoms on**  
2  
3 **all-cause and cause-specific mortality by health status in community dwelling adults: The**  
4  
5 **REGARDS study**

6  
7  
8 **Running Title:** depressive symptoms and mortality

9  
10 **Authors:** Nathalie Moise, MD, MS<sup>1</sup> (assistant professor); Yulia Khodneva, MD, PhD<sup>2</sup> (medical  
11 resident); Deanna Pereira Jannat-Khah, DrPH, MSPH<sup>3</sup> (senior research data analyst); Joshua  
12 Richman, MD, PhD<sup>2</sup> (professor); Karina W. Davidson, PhD<sup>1</sup> (professor); Ian M. Kronish, MD,  
13 MPH<sup>1</sup> (assistant professor); Jonathan Shaffer, PhD<sup>4</sup> (assistant professor); Monika M. Safford,  
14 MD<sup>3</sup> (professor)

15  
16  
17  
18 **Affiliations:** <sup>1</sup>Center for Behavioral Cardiovascular Health, Department of Medicine, Division of  
19 Cardiology, Columbia University Medical Center, New York, NY; <sup>2</sup>University of Alabama at  
20 Birmingham, Birmingham, AL; <sup>3</sup>Weill Cornell Medical College, New York, NY.  
21  
22  
23  
24 <sup>4</sup>Department of Psychology, University of Colorado Denver;

25  
26 **Corresponding Author:**

27 Nathalie Moise, MD, MS  
28 Center for Behavioral and Cardiovascular Health, Department of Medicine  
29 Columbia University Medical Center  
30 622 W. 168<sup>th</sup> Street, PH9- Room 321  
31 New York, NY 10032  
32 Phone: 212-342-2889  
33 Fax: 212-342-3431  
34 Email: [nm2562@cumc.columbia.edu](mailto:nm2562@cumc.columbia.edu)

35  
36  
37 **Journal Subject Codes:** mortality, depression, health status

38  
39 **Total Document Text Count:** 3063

40  
41  
42 **Abstract:** 240/300  
43  
44  
45  
46  
47  
48  
49  
50  
51  
52  
53  
54  
55  
56  
57  
58  
59  
60

## Abstract

**Objective:** To assess the association between time-varying depressive symptoms with all-cause and cause-specific mortality

**Design:** The Reasons for Geographic and Racial Differences in Stroke (REGARDS) is a national, population-based longitudinal study conducted from 2003-2007.

**Setting:** General continental U.S. communities

**Participants:** 29,491 black and white U.S. adults  $\geq 45$  years randomly sampled within race-sex-geographic strata

**Exposure:** Elevated depressive symptoms (CES-D-4  $\geq 4$ ) measured at baseline and on average 5 and 7 years later

**Main Outcome Measures:** Cox proportional hazard regression models assessed cancer, non-cardiovascular (CVD), CVD and all-cause mortality.

**Results:** The average age was 64.9 years; 55% were female; 41% black; 11.0% had elevated depressive symptoms; 54% had poor, fair or good health. Time-varying depressive symptoms were significantly associated with nonCVD (aHR=1.29, 95% CI 1.16-1.44) and all-cause (aHR=1.24, 95%CI 1.14-1.39), but not cancer (aHR=1.15, 95%CI 0.96-1.38) or CVD (aHR=1.13, 95%CI 0.98-1.32) death adjusting for demographics, chronic clinical diseases, behavioral risk factors, and physiologic factors. Depressive symptoms were related to all-cause (aHR=1.48, 95%CI 1.27-1.78), CVD (aHR=1.37, 95%CI 0.99-1.91), nonCVD (aHR=1.54, 95%CI 1.24-1.92) and cancer (aHR=1.36 95% 0.97-1.91) death in those who reported excellent or very good health. The analyses of the association between one measure of baseline depressive symptoms and mortality analyses yielded similar results.

1 **Conclusions:** Time-varying depressive symptoms confer an increased risk for all-cause  
2 mortality, CVD, non-CVD death and cancer death, particularly in those with excellent or very  
3 good health. These findings may have implications for timely treatment, regardless of health  
4 status.  
5  
6  
7  
8  
9

### 10 **Strengths and limitations of this study.**

- 11 • Depression is a relapsing/remitting disease and our study is one of the first to use multiple  
12 measurements of depression to demonstrate a time varying relationship between  
13 depression and mortality, including cancer mortality, in a large, diverse cohort.
  - 14 • To our knowledge, we are also the first to report a significant moderating effect of self-  
15 reported health on the relationship between depressive symptoms and cause-specific  
16 mortality, with depression predicting mortality particularly in those with excellent or very  
17 good reported health.
  - 18 • Our analyses were limited by the use of the short form of the CES-D scale
  - 19 • The REGARDS cohort is regionally specific, limiting generalizability.
- 20  
21  
22  
23  
24  
25  
26  
27  
28  
29  
30  
31  
32  
33  
34  
35  
36  
37  
38  
39  
40  
41  
42  
43  
44  
45  
46  
47  
48  
49  
50  
51  
52  
53  
54  
55  
56  
57  
58  
59  
60



## Introduction

It is well known that elevated depressive symptoms predict mortality,<sup>1</sup> both in high-risk individuals with chronic illnesses like cardiovascular disease (CVD), and in general populations.<sup>2-4 5-8</sup> More recently, several studies have shown that depressive symptoms both preceding and following cancer diagnosis may confer an increased risk of cancer death as well.<sup>9,10</sup>

However, depressive symptoms relapse and remit, and prior studies on the relationship between depressive symptoms and mortality have been limited by one measurement of depressive symptoms.<sup>1</sup> Recently, Lasserre et al. (2016) found that current but not remitted depressive symptoms predict all-cause mortality, but again depression diagnoses and history were ascertained at one time point.<sup>11</sup> In addition, prior literature has often been marked by inadequate adjustment for important covariates, such as behavioral risk factors. To our knowledge, few if any prior studies have examined the time-varying association between depressive symptoms and excess causes of death, including all-cause and cause specific mortality. In addition, self-perceived health status may predict mortality<sup>12</sup> and complicate the relationship between depressive symptoms and poor outcomes.<sup>13</sup> It is unknown whether depressive symptoms confer an increased risk of excess mortality equally in those with self-reported excellent/very good (in whom depression may be less likely to be recognized) and good/fair/poor health.

The purpose of our study is to examine the association between time-varying depressive symptoms with cancer, CVD, nonCVD and all-cause mortality in the Reasons for Geographic and Racial Differences in Stroke (REGARDS) study, a broad, diverse population cohort with repeat measurements of depressive symptoms. We stratify by self-reported baseline health status

1 (very good or excellent vs. poor, fair or good) to further isolate the association between  
2  
3 depressive symptoms and excess mortality.  
4  
5  
6  
7

## 8 **Methods**

9  
10 The REGARDS study is a national cohort study of stroke incidence and cognitive decline in  
11 black and white community dwelling adults  $\geq 45$  years living in the United States stratified to  
12 reflect specific race-sex-geographic strata.<sup>14</sup> Inclusion and exclusion criteria have been  
13 previously described; of note, those with active cancer were excluded from the original study.<sup>14</sup>  
14  
15 Coronary heart disease (CHD) outcomes were ascertained from a REGARDS-MI ancillary study.  
16  
17 Participants were recruited by mail using commercially available lists of U.S. residents, followed  
18 by a computer-assisted telephone interview and subsequent home visit at which time individuals  
19 were consented and enrolled. Between January 2003 and October 2007, 30,239 black and white  
20 adults were enrolled. Of these, 489 (1.6%) were lost to follow-up and 208 (0.7%) were missing  
21 baseline depressive symptom measurements (**Figure 1**). The REGARDS study protocol was  
22 approved by institutional review boards at participating centers.  
23  
24  
25  
26  
27  
28  
29  
30  
31  
32  
33  
34  
35  
36  
37

### 38 *Study Procedures*

39  
40 Baseline data were collected through computer-assisted telephone interviews, an in-home  
41 examination, and self-administered questionnaires. Trained research staff conducted telephone  
42 interviews to collect demographic data, medical history and behavioral risk factors. Following  
43 the telephone interview, individuals had an in-home visit during which physical measurements, a  
44 resting electrocardiogram, medication inventory, phlebotomy and urine were collected. The  
45 median time between the initial phone interview and in-home examination was 28.0  
46  
47  
48  
49  
50  
51  
52  
53  
54 (interquartile range = 21.0) days.  
55  
56  
57  
58  
59  
60

### *Primary Outcomes*

The primary outcomes for these analyses were (1) cancer mortality (all body sites) (2) CVD death defined as death from CHD, stroke, heart failure, sudden cardiac death, vascular pathology, and other CVD causes (3) non-CVD death and (4) all-cause mortality. Living participants or their proxies were followed up every 6 months by telephone with retrieval of medical records for reported hospitalizations or physician visits. Deaths were detected by report of next-of-kin or through online services (e.g., Social Security Death Index) or the National Death Index.<sup>14</sup> Death certificates, medical records, and autopsy reports were obtained to adjudicate cause of death and CVD outcomes.

### *Depressive symptoms*

The primary predictor was baseline depressive symptoms. The 4-item Center for Epidemiologic Studies Depression (CES-D) scale was used to assess the presence of depressive symptoms. This scale asks participants to rate the number of days over the last week in which they had: 1) felt depressed; 2) felt lonely; 3) had crying spells; and 4) felt sad. Response options included <1 day, 1 to 2 days, 3 to 4 days, and 5-7 days (0, 1, 2, 3 points, respectively). Cronbach's  $\alpha$  for the CES-D in the total sample was 0.80. Elevated depressive symptoms were defined as a summed score of  $\geq 4$ .<sup>15</sup> The reliability and validity of the CES-D 4 is similar to the original 20-item instrument.<sup>16</sup>

### *Covariates*

Demographic data included self-reported age, gender, race (black or white), education (less than high school, high school graduate, some college, and college graduate and above), annual income (less than \$20,000, \$20,000-\$34,999, \$35,000-\$74,999, \$75,000 and above), insurance

1 status (yes/no), and stroke region (including the ‘stroke belt’ and ‘stroke buckle’). Clinical risk  
2  
3 factors included (1) diabetes defined as fasting blood glucose  $\geq 126$  or random glucose  $>200$   
4  
5 mL/dL or oral hypoglycemic or insulin use, (2) systolic and diastolic blood pressures based on  
6  
7 the average of two standardized blood pressure measurements (in mm Hg) (3) body mass index  
8  
9 (BMI) based on measured height and weight (4) albumin-to-creatinine ratio (ACR)  
10  
11 (logarithmically-transformed), (5) high-density lipoprotein (HDL)-cholesterol, (6) total  
12  
13 cholesterol, (7) history of CVD: coronary heart disease (self-reported history of myocardial  
14  
15 infarction or coronary revascularization procedure or evidence of myocardial infarction on the  
16  
17 study electrocardiogram), self-reported stroke, peripheral vascular disease, or aneurysm, (8)  
18  
19 cognitive impairment on the 6-item screener of global cognitive function<sup>17,18</sup> (9) chronic lung  
20  
21 disease defined as use of beta-2 adrenergic agonists, leukotriene inhibitors, inhaled  
22  
23 corticosteroids, combination inhalers, or other pulmonary medications such as ipratropium,  
24  
25 cromolyn, aminophylline and theophylline. We also assessed self-reported (yes/no) aspirin,  
26  
27 antidepressant (serotonin and norepinephrine reuptake inhibitors, selective serotonin reuptake  
28  
29 inhibitors, tricyclic antidepressants), statin, and antihypertensive use. Behavioral risk factors  
30  
31 included (1) self-reported pack-years of cigarette smoking; (2) physical activity (“How many  
32  
33 times per week do you engage in intense physical activity, enough to work up a sweat?” with  
34  
35 response options of “none”, “1-3 times per week” and “4 or more times per week”); (3) alcohol  
36  
37 use (“How many alcoholic beverages do you drink?”: none, moderate [1 drink per day for  
38  
39 women or 2 drinks per day for men], and heavy [greater than 1 drink per day for women and 2  
40  
41 drinks per day for men]);<sup>14</sup> (4) medication non-adherence assessed with the 4-item Morisky  
42  
43 Medication Adherence Scale ( $\geq 1$ ).<sup>19</sup> Potential physiologic risk factors included high-sensitivity  
44  
45 C-reactive protein, self-reported health status based on the physical component of the 12-item  
46  
47 Short-Form Health Survey (SF 12),<sup>20</sup> and perceived stress, measured by the 4-item version of the  
48  
49  
50  
51  
52  
53  
54  
55  
56  
57  
58  
59  
60

1 Perceived Stress Scale (score of  $\geq 5$  vs.  $<5$ ).<sup>21</sup> Other than depressive symptoms, no other  
2  
3 covariate was assessed more than once.  
4  
5

### 6 7 8 *Statistical Analyses* 9

10 Baseline characteristics of participants with and without elevated depressive symptoms at  
11  
12 baseline were compared using chi-square tests (for categorical variables), Student t tests (for  
13  
14 continuous variables), and Wilcoxon rank sum tests (for non-normally distributed continuous  
15  
16 measures).  
17  
18

19  
20  
21 Cox proportional hazard regression models were constructed to separately analyze the  
22  
23 association between depressive symptoms ( $\text{CES-D} \geq 4$ ) and cancer death (from all body sites, a  
24  
25 subset of nonCVD death), CVD death, nonCVD death and all-cause death. The end date of  
26  
27 follow-up for this analysis was December 31, 2012. Depressive symptoms were measured on the  
28  
29 CES-D scale: 1) at baseline (initial telephone call), 2) on average five years after baseline  
30  
31 measurement, and 3) on average two years after the second measurement. In the analyses, we  
32  
33 considered depressive symptoms ( $\text{CES-D} \geq 4$  vs.  $<4$ ) as a time-varying exposure, with updates of  
34  
35 exposure at 5-year and 7-year follow-up. Therefore, each participant contributed up to 3  
36  
37 measures of CES-D ( $\geq 4$  vs.  $<4$ ) with a broken-up follow-up time. Follow-up time for each  
38  
39 participant was calculated from the date of the in-home visit to the date of the earliest of: death,  
40  
41 last telephone follow-up, end of follow-up or next CES-D measure. We additionally graphically  
42  
43 plotted unadjusted survival functions for participants with elevated vs. nonelevated depressive  
44  
45 symptoms using the Simon-Makuch method,<sup>22</sup> a modification of the Kaplan-Meier method. In  
46  
47 this context, depression status is treated as a binary time-dependent covariate and study cohorts  
48  
49 are continually updated to contribute to either the  $\text{CES-D} \geq 4$  or  $\text{CES-D} < 4$  groups.  
50  
51  
52  
53  
54  
55  
56  
57  
58  
59  
60

1  
2  
3 Unadjusted hazard ratios and 95% confidence intervals (CI) of mortality endpoints were  
4  
5 estimated for those with vs. without elevated depressive symptoms. Adjusted modeling  
6  
7 proceeded in stages (adjusting for baseline covariates), starting with demographic (Model 1) and  
8  
9 traditional CVD risk factors (Model 2) assessed in prior trials. We then added behavioral (Model  
10  
11 3) and other potential explanatory (Model 4) factors. We also ran an additional model (Model 5),  
12  
13 which considered intervening first non-fatal stroke and/or myocardial infarction as a time-  
14  
15 dependent covariate in CVD death outcomes. All analyses were conducted overall as well as  
16  
17 stratified. We also conducted a formal test for interaction between time-varying depressive  
18  
19 symptoms and self-reported health (defined as excellent or very good vs. good, fair or poor  
20  
21 health) in model 4. As such, all analyses were conducted overall as well as stratified by baseline  
22  
23 self-reported health. To test the proportional hazards assumptions, we performed the chi-squared  
24  
25 test for the Schoenfeld residuals and all the models resulted in a violation of the proportional  
26  
27 hazards assumptions, indicating that time-varying depressive symptoms were appropriate. The  
28  
29 proportionality assumption for time varying depressive symptoms was also tested by assessing  
30  
31 the interaction of depressive symptoms\*log of follow-up time and was satisfied for all mortality  
32  
33 endpoints.  
34  
35  
36  
37  
38  
39  
40  
41

42 Missing data in covariates were imputed using chained equations and derived by bootstrapping  
43  
44 across the 5 imputed datasets. Of the 29,491 participants, 2768 (9%) were missing income data,  
45  
46 59 (0.2%) health status, 9 (<0.1%) education, 26 (0.1%) health insurance, 1087 (4%) diabetes, 16  
47  
48 (0.1%) aspirin use, 70 (0.2%) statin use, 70 (0.2%) antidepressant use, 333 (1%) anti-  
49  
50 hypertension meds use, 439 (2%) physical activity, 2705 (9%) medication adherence, 213 (0.7%)  
51  
52 BMI, 1254 (4%) cholesterol, 1401 (5%) HDL, 912 (3.1%) pack years, 84 (0.3%) SBP, 1394  
53  
54  
55  
56  
57  
58  
59

1 (5%) renal function, 381 (1%) QTc, 5681 (19.3%) cognitive status, 4 (<0.1%) stress, 1425 (4%)  
2  
3 SF-12 and 1881 (6%) CRP. Analyses were conducted using SAS software version 9.4 (SAS  
4  
5 Institute, Cary, NC) and STATA version 12 (STATA incorporated, College Station, TX).  
6  
7  
8  
9

### 10 *Sensitivity Analyses*

11  
12 Sensitivity analyses constructed in parallel to the main analyses examined association of baseline  
13  
14 CES-D measure with mortality endpoints in the sequentially-adjusted Cox proportional hazard  
15  
16 regression models. The end date of follow-up for this analysis was December 31, 2012. Follow-  
17  
18 up time for each participant was calculated from the date of the in-home visit to the date of the  
19  
20 earliest of: death, last telephone follow-up, or end of follow-up.  
21  
22  
23  
24  
25  
26

## 27 **Results**

### 28 *Participant Characteristics*

29  
30 Overall, 1.6% were lost to follow-up and 0.7% were missing baseline depressive symptoms,  
31  
32 leaving 29,491 eligible participants (**Figure 1**) of whom 3,254 (11.0%) had elevated depressive  
33  
34 symptoms at baseline (CES-D $\geq$ 4). The average age was 64.9 (9.4) years; 55.1% were female and  
35  
36 41.1% were black, 22.0% had diabetes, 9.2% chronic lung disease, and 23.1% CVD. Nearly 33%  
37  
38 of individuals were physically inactive, 29.2% non-adherent to their medication regimen and  
39  
40 14.5% current smokers. A total of 53.5% of participants self-reported their general health to be  
41  
42 poor, fair, or good compared to 46.5% who reported their health to be excellent or very good, of  
43  
44 whom 16.0% and 5.3% had elevated depressive symptoms, respectively (eTable 1). Regardless  
45  
46 of health status, participants with elevated (vs. non-elevated) depressive symptoms were more  
47  
48 likely to be female, African-American, low income, have more chronic diseases, low physical  
49  
50 health, and more behavioral risk factors (**Table 1A-B**).  
51  
52  
53  
54  
55  
56  
57  
58  
59  
60

**Table 1A. Overall baseline characteristics of REGARDS participants according to baseline depressive symptoms (CES-D)**

| Characteristics                                          | Overall<br>(n=29,491) | CES-D < 4<br>(n=26,817) | CES-D ≥4<br>(n=3,254) | <i>p</i> |
|----------------------------------------------------------|-----------------------|-------------------------|-----------------------|----------|
| <b><i>Socio-demographics</i></b>                         |                       |                         |                       |          |
| Age, <i>M</i> (SD)                                       | 64.9 (9.4)            | 65.1 (9.4)              | 63.2 (9.8)            | <.001    |
| Female, n (%)                                            | 16245 (55.1)          | 13988 (53.3)            | 2257 (69.4)           | <.001    |
| African American, n (%)                                  | 12129 (41.1)          | 10427 (39.7)            | 1702 (52.3)           | <.001    |
| Less than high school education, n (%)                   | 3696 (12.5)           | 2916 (11.1)             | 780 (24.0)            | <.001    |
| Annual household income, n (%)                           |                       |                         |                       |          |
| Less than \$20,000                                       | 5322 (18.0)           | 4148 (15.8)             | 1174 (36.1)           | <.001    |
| No health insurance, n (%)                               | 1926 (6.5)            | 1532 (5.8)              | 394 (12.1)            | <.001    |
| Region, n (%)                                            |                       |                         |                       | <.001    |
| Stroke belt <sup>a</sup>                                 | 10193 (34.6)          | 8973 (34.2)             | 1220 (37.5)           |          |
| Stroke buckle <sup>b</sup>                               | 6188 (21.0)           | 5437 (20.7)             | 751 (23.1)            |          |
| Non-stroke belt or buckle                                | 13110 (44.5)          | 11827 (45.1)            | 1283 (39.4)           |          |
| <b><i>General health and medical conditions</i></b>      |                       |                         |                       |          |
| Self-reported general health, n (%)                      |                       |                         |                       | <.001    |
| Poor, fair, good                                         | 15742 (53.5)          | 13219 (50.5)            | 2523 (77.7)           |          |
| Excellent, very good                                     | 13690 (46.5)          | 12965 (49.5)            | 725 (22.3)            |          |
| Cardiovascular disease, n (%) <sup>c</sup>               | 6825 (23.1)           | 5838 (22.3)             | 987 (30.3)            | <.001    |
| Diabetes, n (%) <sup>d</sup>                             | 6252 (22.0)           | 5305 (21.0)             | 947 (30.2)            | <.001    |
| COPD, n (%)                                              | 2710 (9.2)            | 2307 (8.8)              | 403 (12.4)            | <.001    |
| Physical component score on SF-12 scale, <i>M</i> (SD)   | 46.4 (10.6)           | 47.1 (10.2)             | 40.7 (12.2)           | <.001    |
| <b><i>Physiological risk factors</i></b>                 |                       |                         |                       |          |
| Body Mass Index, kg/m <sup>2</sup> , <i>M</i> (SD)       | 29.3 (6.2)            | 29.2 (6.1)              | 30.6 (7.1)            | <.001    |
| Systolic Blood Pressure, mmHg, <i>M</i> (SD)             | 127.6 (16.7)          | 127.5 (16.5)            | 128.7 (18.1)          | <.001    |
| Total Cholesterol, mg/dL, <i>M</i> (SD)                  | 192.1 (40.1)          | 191.7 (39.8)            | 194.6 (43.0)          | <0.001   |
| High-Density Lipoprotein, mg/dL, <i>M</i> (SD)           | 51.8 (16.2)           | 51.7 (16.2)             | 52.5 (16.3)           | 0.02     |
| QT Interval, corrected for heart rate, ms, <i>M</i> (SD) | 407.5 (23.6)          | 407.2 (23.5)            | 410.0 (24.1)          | <.001    |
| High-Sensitivity C-Reactive Protein, mg/L, median, IQR   | 2.2[1.0-5.0]          | 2.1[0.9-4.8]            | 3.0[1.2-6.9]          | <.001    |
| Albumin to Creatinine Ratio, mg/g, median, IQR           | 7.4[4.7-6.2]          | 7.3[4.6-15.8]           | 8.2[5.1-19.8]         | <.001    |
| <b><i>Medications</i></b>                                |                       |                         |                       |          |
| Antihypertensive medication use, n (%)                   | 15197 (52.1)          | 13290 (51.2)            | 1907 (59.4)           | <.001    |
| Statin use, n (%)                                        | 9295 (31.6)           | 8248 (31.5)             | 1047 (32.3)           | 0.38     |



|    |                                             |              |              |              |        |
|----|---------------------------------------------|--------------|--------------|--------------|--------|
| 1  | Aspirin use, n (%)                          | 12790 (43.4) | 11376 (43.4) | 1414 (43.5)  | 0.91   |
| 2  |                                             |              |              |              |        |
| 3  | Antidepressant use, n (%)                   | 4086 (13.9)  | 3164 (12.1)  | 922 (28.4)   | <.001  |
| 4  | <b>Behavioral risk factors</b>              |              |              |              |        |
| 5  | Self-reported smoking, pack years, <i>M</i> |              |              |              |        |
| 6  | (SD)                                        | 13.5 ( 23.1) | 13.3 ( 22.8) | 15.5 ( 24.9) | <.001  |
| 7  |                                             |              |              |              |        |
| 8  | Current Smoking, n(%)                       | 4263(14.5)   | 3463(13.3)   | 800(24.7)    | <.001  |
| 9  |                                             |              |              |              |        |
| 10 | Alcohol use, n (%)                          |              |              |              | <.001  |
| 11 | Heavy                                       | 1172 (4.1)   | 1043 (4.0)   | 129 (4.1)    |        |
| 12 | Moderate                                    | 9626 (33.3)  | 8786 (34.1)  | 840 (26.6)   |        |
| 13 | None                                        | 18116 (62.7) | 15925 (61.8) | 2191 (69.3)  |        |
| 14 | Physical inactivity, n (%)                  | 10004 (34.4) | 8500 (32.9)  | 1504 (46.9)  | <0.001 |
| 15 |                                             |              |              |              |        |
| 16 | Medication non-adherence, n (%)             | 7959 (29.7)  | 6820 (28.7)  | 1139 (37.8)  | <.001  |
| 17 |                                             |              |              |              |        |
| 18 | Impaired cognitive status                   | 1888 (7.9)   |              |              |        |
| 19 | (Cognitive score $\leq 4$ )                 |              | 1542 (7.3)   | 346 (12.6)   | <.001  |
| 20 | Elevated perceived stress (PSS $\geq 5$ )   | 8591 (29.1)  | 6283 (23.9)  | 2308 (70.9)  | <.001  |

*p* Values from chi square, Student *t* tests. CES-D = Centers for Epidemiology Studies – Depression scale.

CVD = cardiovascular disease. IQR = interquartile range. *M* = mean. SD = standard deviation;

PSS=Perceived stress scale; COPD=Chronic Obstructive Pulmonary Disease

n= total number assuming no missing data

<sup>a</sup>Stroke Belt defined as the states of Alabama, Arkansas, Louisiana, Mississippi, Tennessee and the noncoastal regions within the states of North Carolina, South Carolina and Georgia.

<sup>b</sup>Stroke buckle defined as coastal regions within the states of North Carolina, South Carolina and Georgia.

<sup>c</sup>CVD defined as baseline coronary heart disease, stroke, periphery artery disease or aortic aneurism.

<sup>d</sup>Diabetes defined as fasting blood glucose  $\geq 126$  or random glucose  $>200$  mL/dL or oral hypoglycemic or insulin use.

**Table 1B. Baseline characteristics of REGARDS participants according to baseline depressive symptoms (CES-D) and self-reported health**

| Characteristics                                          | <i>Self-reported general health as "excellent or very good"</i> |                     |          | <i>Self-reported general health as "poor, fair or good"</i> |                      |          |
|----------------------------------------------------------|-----------------------------------------------------------------|---------------------|----------|-------------------------------------------------------------|----------------------|----------|
|                                                          | CES-D < 4<br>(n=12965)                                          | CES-D ≥4<br>(n=725) | <i>p</i> | CES-D < 4<br>(n=13219)                                      | CES-D ≥4<br>(n=2523) | <i>p</i> |
| <b><i>Socio-demographics</i></b>                         |                                                                 |                     |          |                                                             |                      |          |
| Age, <i>M</i> (SD)                                       | 64.8 (9.4)                                                      | 64.5 (10.2)         | 0.47     | 65.5 (9.3)                                                  | 62.8 (9.6)           | <.001    |
| Female, n (%)                                            | 6600 (50.9)                                                     | 501 (69.1)          | <.001    | 7357 (55.7)                                                 | 1751 (69.4)          | <.001    |
| African American, n (%)                                  | 3726 (28.7)                                                     | 295 (40.7)          | <.001    | 6677 (50.5)                                                 | 1404 (55.6)          | <.001    |
| Less than high school education, n (%)                   | 845 (6.5)                                                       | 119 (16.4)          | <.001    | 2059 (15.6)                                                 | 658 (26.1)           | <.001    |
| Annual household income, n (%)                           |                                                                 |                     |          |                                                             |                      |          |
| Less than \$20,000                                       | 1304 (10.1)                                                     | 190 (26.2)          | <.001    | 2832 (21.4)                                                 | 983 (39.0)           | <.001    |
| No health insurance, n (%)                               | 644 (5.0)                                                       | 70 (9.7)            | <.001    | 884 (6.7)                                                   | 324 (12.9)           | <.001    |
| Region, n (%)                                            |                                                                 |                     | 0.37     |                                                             |                      | <.001    |
| Stroke belt <sup>a</sup>                                 | 4282 (33.0)                                                     | 256 (35.3)          |          | 4668 (35.3)                                                 | 963 (38.2)           |          |
| Stroke buckle <sup>b</sup>                               | 2619 (20.2)                                                     | 148 (20.4)          |          | 2807 (21.2)                                                 | 601 (23.8)           |          |
| Non-stroke belt or buckle                                | 6064 (46.8)                                                     | 321 (44.3)          |          | 5744 (43.5)                                                 | 959 (38.0)           |          |
| <b><i>General health and medical conditions</i></b>      |                                                                 |                     |          |                                                             |                      |          |
| Self-reported general health, n (%)                      |                                                                 |                     |          |                                                             |                      |          |
| Poor, fair, good                                         | --                                                              | --                  |          | ---                                                         | --                   |          |
| Excellent, very good                                     | --                                                              | --                  |          | ---                                                         | ---                  |          |
| Cardiovascular disease, n (%) <sup>c</sup>               | 1948 (15.0)                                                     | 144 (19.9)          | 0.004    | 3874 (29.3)                                                 | 840 (33.3)           | <.001    |
| Diabetes, n (%) <sup>d</sup>                             | 1443 (11.6)                                                     | 93 (13.3)           | 0.16     | 3840 (30.2)                                                 | 853 (35.1)           | <.001    |
| COPD, n (%)                                              | 796 (6.2)                                                       | 55 (7.6)            | 0.11     | 1507 (11.4)                                                 | 347 (13.8)           | 0.007    |
| Physical component score on SF-12 scale, <i>M</i> (SD)   | 52.0 (6.5)                                                      | 51.3 (9.1)          | 0.008    | 42.0 (10.7)                                                 | 37.7 (11.3)          | <.001    |
| <b><i>Physiological risk factors</i></b>                 |                                                                 |                     |          |                                                             |                      |          |
| Body Mass Index, kg/m <sup>2</sup> , <i>M</i> (SD)       | 27.8 (5.1)                                                      | 28.4 (5.7)          | 0.006    | 30.5 (6.6)                                                  | 31.2 (7.3)           | <.001    |
| Systolic Blood Pressure, mmHg, <i>M</i> (SD)             | 125.3 (15.7)                                                    | 126.0 (17.2)        | 0.27     | 129.6 (16.9)                                                | 129.5 (18.3)         | 0.91     |
| Total Cholesterol, mg/dL, <i>M</i> (SD)                  | 193.8 (38.2)                                                    | 195.5 (38.6)        | 0.26     | 189.7 (41.2)                                                | 194.4 (44.2)         | <.001    |
| High-Density Lipoprotein, mg/dL, <i>M</i> (SD)           | 53.1 (16.4)                                                     | 55.8 (16.6)         | <.001    | 50.4 (15.8)                                                 | 51.5 (16.1)          | 0.002    |
| QT Interval, corrected for heart rate, ms, <i>M</i> (SD) | 405.6 (22.6)                                                    | 407.2 (23.5)        | 0.06     | 408.7 (24.3)                                                | 410.8 (24.2)         | <0.001   |
| High-Sensitivity C-Reactive Protein, mg/L, median, IQR   | 1.7[0.8-3.8]                                                    | 1.9[0.9-4.9]        | 0.004    | 2.7[1.2-6.1]                                                | 3.4[1.3-7.7]         | <.001    |
| Albumin to Creatinine Ratio, mg/g, median, IQR           | 6.6[4.3-12.3]                                                   | 6.9[4.7-14.0]       | 0.005    | 8.4[5.0-20.7]                                               | 8.7[5.1-22.2]        | 0.18     |
|                                                          | 4916 (38.3)                                                     | 297 (41.7)          | 0.06     | 8344 (63.9)                                                 | 1606 (64.5)          | 0.57     |

**Medications**

|                                                      |              |              |       |              |              |       |
|------------------------------------------------------|--------------|--------------|-------|--------------|--------------|-------|
| Antihypertensive medication use, n (%)               |              |              |       |              |              |       |
| Statin use, n (%)                                    | 3407 (26.4)  | 176 (24.4)   | 0.24  | 4822 (36.5)  | 870 (34.6)   | 0.06  |
| Aspirin use, n (%)                                   | 5254 (40.5)  | 273 (37.7)   | 0.13  | 6100 (46.2)  | 1140 (45.2)  | 0.36  |
|                                                      |              |              |       |              |              | <.001 |
| Antidepressant use, n (%)                            | 1224 (9.5)   | 144 (19.9)   | <.001 | 1933 (14.6)  | 774 (30.8)   |       |
| <b>Behavioral risk factors</b>                       |              |              |       |              |              |       |
| Self-reported smoking, pack years, <i>M</i> (SD)     | 11.2 ( 20.5) | 12.1 ( 21.6) | 0.24  | 15.3 ( 24.7) | 16.5 ( 25.6) | 0.03  |
| Current Smoking, n(%)                                | 1344 (10.4)  | 114 (15.8)   | <.001 | 2110 (16.0)  | 684 (27.2)   | <.001 |
| Alcohol use, n (%)                                   |              |              | 0.01  |              |              | <.001 |
| Heavy                                                | 634 (5.0)    | 38 (5.4)     |       | 409 (3.2)    | 91 (3.7)     |       |
| Moderate                                             | 5034 (39.4)  | 238 (33.8)   |       | 3746 (29.0)  | 600 (24.5)   |       |
| None                                                 | 7103 (55.6)  | 429 (60.9)   |       | 8779 (67.9)  | 1758 (71.8)  |       |
| Physical inactivity, n (%)                           | 3107 (24.3)  | 259 (36.0)   | <.001 | 5372 (41.3)  | 1242 (50.0)  | <.001 |
| Medication non-adherence, n (%)                      | 2997 (26.2)  | 211 (33.1)   | <.001 | 3809 (31.0)  | 926 (39.1)   | <.001 |
| Impaired cognitive status (Cognitive score $\leq$ 4) | 587 (5.6)    | 61 (10.1)    | <.001 | 947 (8.9)    | 285 (13.3)   | <.001 |
| Elevated perceived stress (PSS $\geq$ 5)             | 2219 (17.1)  | 404 (55.7)   | <.001 | 4048 (30.6)  | 1900 (75.3)  | <.001 |

*p* Values from chi square, Student *t* tests. CES-D = Centers for Epidemiology Studies – Depression scale.

CVD = cardiovascular disease. IQR = interquartile range. *M* = mean. SD = standard deviation;

PSS=Perceived stress scale; COPD=Chronic Obstructive Pulmonary Disease

n= total number assuming no missing data

<sup>a</sup>Stroke Belt defined as the states of Alabama, Arkansas, Louisiana, Mississippi, Tennessee and the noncoastal regions within the states of North Carolina, South Carolina and Georgia.

<sup>b</sup>Stroke buckle defined as coastal regions within the states of North Carolina, South Carolina and Georgia.

<sup>c</sup>CVD defined as baseline coronary heart disease, stroke, periphery artery disease or aortic aneurism.

<sup>d</sup>Diabetes defined as fasting blood glucose  $\geq$ 126 or random glucose >200 mL/dL or oral hypoglycemic or insulin use.

**Mortality**

A total of 4,581 (15.5%) participants died during the follow-up period ending in 2012. Of these, 1,551 (33.9%) were attributed to CVD and 3,030 (66.1%) to nonCVD disease death. Of nonCVD deaths, 1,226 (44.3%) were due to cancer death (eTable 2). Overall, there were only 3 cases of mortality due to suicide.

For the time-varying analyses, depressive symptoms were measured at baseline and on average 4.8 years (SD = 1.5) years following the baseline measurement, the third measurement occurring on average 2.1 (SD = 0.4) years after the second measurement (eFigure 1). The mean follow-up time

1 of the second and third measurement of CES-D measures did not differ by self-reported health  
2  
3 (eFigure 2). Of the participants with elevated depressive symptoms at baseline, 39.9% and 36.8%  
4  
5 had elevated depressive symptoms at the second and third measures, respectively (eTable 3). Time-  
6  
7 varying depressive symptoms significantly predicted nonCVD disease death (aHR 1.29, 95% CI  
8  
9 1.16-1.44) and all-cause mortality (aHR 1.24, 95% CI 1.14-1.36), while approaching significance  
10  
11 for cancer death (aHR 1.15, 95% CI 0.96-1.38) and CVD death (aHR 1.13, 95% CI 0.98-1.32),  
12  
13 even after adjusting for demographic, clinical, behavioral physiologic factors and time-varying non-  
14  
15 fatal CVD events (**Table 2**, eFigure 3). The results appeared to be particularly robust amongst those  
16  
17 with excellent or very good self-reported general health: all-cause (aHR=1.48, 95%CI 1.27-1.78),  
18  
19 CVD (aHR=1.37, 95%CI 0.99-1.91), nonCVD (aHR=1.54, 95%CI 1.24-1.92) and cancer  
20  
21 (aHR=1.36 95% 0.97-1.91) death. In Model 4, the p-values for the depressive symptoms x health  
22  
23 status interaction term were 0.005 (all-cause mortality), 0.06 (CVD death), 0.03 (nonCVD death),  
24  
25 and 0.20 (cancer death) (**Table 2**).

**Table 2. Association of time-variant elevated depressive symptoms with mortality outcomes.** Each participant contributes to up to 3 time-variant CES-D measures. End of follow-up December 31, 2012.

|                                                                                                                                                                                                                                                                                                                                                                                                                                                                     | Overall (N=29,491)     | Self-reported general health as "excellent or very good" n=13,711 | Self-reported general health as "poor, fair or good" n=15,780 |
|---------------------------------------------------------------------------------------------------------------------------------------------------------------------------------------------------------------------------------------------------------------------------------------------------------------------------------------------------------------------------------------------------------------------------------------------------------------------|------------------------|-------------------------------------------------------------------|---------------------------------------------------------------|
| <b>HR (95%CI) for time-variant categorical CES-D (Score =&gt;4 v. &lt;4)</b>                                                                                                                                                                                                                                                                                                                                                                                        |                        |                                                                   |                                                               |
| <b>All-cause mortality</b>                                                                                                                                                                                                                                                                                                                                                                                                                                          |                        |                                                                   |                                                               |
| Events, n                                                                                                                                                                                                                                                                                                                                                                                                                                                           | 4581                   | 1392                                                              | 3189                                                          |
| Crude                                                                                                                                                                                                                                                                                                                                                                                                                                                               | <b>1.66(1.54-1.80)</b> | <b>1.97(1.66-2.33)</b>                                            | <b>1.30(1.19-1.42)</b>                                        |
| Model 1 <sup>a</sup>                                                                                                                                                                                                                                                                                                                                                                                                                                                | <b>1.63(1.50-1.76)</b> | <b>1.74(1.46-2.07)</b>                                            | <b>1.42(1.29-1.55)</b>                                        |
| Model 2 <sup>b</sup>                                                                                                                                                                                                                                                                                                                                                                                                                                                | <b>1.42(1.31-1.54)</b> | <b>1.60(1.34-1.90)</b>                                            | <b>1.30(1.19-1.43)</b>                                        |
| Model 3 <sup>c</sup>                                                                                                                                                                                                                                                                                                                                                                                                                                                | <b>1.38(1.27-1.49)</b> | <b>1.57(1.32-1.87)</b>                                            | <b>1.27(1.16-1.39)</b>                                        |
| Model 4 <sup>d</sup>                                                                                                                                                                                                                                                                                                                                                                                                                                                | <b>1.24(1.13-1.35)</b> | <b>1.53(1.27-1.83)</b>                                            | <b>1.16(1.05-1.28)</b>                                        |
| Model 5 <sup>e</sup>                                                                                                                                                                                                                                                                                                                                                                                                                                                | <b>1.24(1.14-1.36)</b> | <b>1.48(1.27-1.78)</b>                                            | <b>1.17(1.06-1.30)</b>                                        |
| Model 4 + CES-D x self-reported health                                                                                                                                                                                                                                                                                                                                                                                                                              |                        | p-value for the interaction term - <b>0.005</b>                   |                                                               |
| <b>CVD Death</b>                                                                                                                                                                                                                                                                                                                                                                                                                                                    |                        |                                                                   |                                                               |
| Events, n                                                                                                                                                                                                                                                                                                                                                                                                                                                           | 1551                   | 437                                                               | 1114                                                          |
| Crude                                                                                                                                                                                                                                                                                                                                                                                                                                                               | <b>1.61(1.41-1.85)</b> | <b>2.01(1.49-2.72)</b>                                            | <b>1.23(1.05-1.43)</b>                                        |
| Model 1 <sup>a</sup>                                                                                                                                                                                                                                                                                                                                                                                                                                                | <b>1.58(1.37-1.81)</b> | <b>1.76(1.29-2.40)</b>                                            | <b>1.35(1.15-1.58)</b>                                        |
| Model 2 <sup>b</sup>                                                                                                                                                                                                                                                                                                                                                                                                                                                | <b>1.31(1.13-1.51)</b> | <b>1.52(1.12-2.08)</b>                                            | <b>1.20(1.03-1.41)</b>                                        |
| Model 3 <sup>c</sup>                                                                                                                                                                                                                                                                                                                                                                                                                                                | <b>1.27(1.10-1.46)</b> | <b>1.53(1.12-2.09)</b>                                            | 1.17(1.00-1.37)                                               |
| Model 4 <sup>d</sup>                                                                                                                                                                                                                                                                                                                                                                                                                                                | 1.15(0.98-1.33)        | <b>1.47(1.07-2.04)</b>                                            | 1.06(0.90-1.26)                                               |
| Model 5 <sup>e</sup>                                                                                                                                                                                                                                                                                                                                                                                                                                                | 1.13(0.98-1.32)        | 1.37(0.99-1.91) p=0.06                                            | 1.07(0.90-1.27)                                               |
| Model 4 + CES-D x self-reported health                                                                                                                                                                                                                                                                                                                                                                                                                              |                        | p-value for the interaction term - <b>0.06</b>                    |                                                               |
| <b>NonCVD Death</b>                                                                                                                                                                                                                                                                                                                                                                                                                                                 |                        |                                                                   |                                                               |
| Events, n                                                                                                                                                                                                                                                                                                                                                                                                                                                           | 3030                   | 955                                                               | 2075                                                          |
| Crude                                                                                                                                                                                                                                                                                                                                                                                                                                                               | <b>1.69(1.53-1.86)</b> | <b>1.95(1.58-2.39)</b>                                            | <b>1.34(1.20-1.50)</b>                                        |
| Model 1 <sup>a</sup>                                                                                                                                                                                                                                                                                                                                                                                                                                                | <b>1.65(1.50-1.83)</b> | <b>1.73(1.40-2.14)</b>                                            | <b>1.45(1.30-1.63)</b>                                        |
| Model 2 <sup>b</sup>                                                                                                                                                                                                                                                                                                                                                                                                                                                | <b>1.48(1.34-1.64)</b> | <b>1.63(1.32-2.02)</b>                                            | <b>1.35(1.23-1.51)</b>                                        |
| Model 3 <sup>c</sup>                                                                                                                                                                                                                                                                                                                                                                                                                                                | <b>1.44(1.30-1.59)</b> | <b>1.59(1.29-1.97)</b>                                            | <b>1.33(1.18-1.49)</b>                                        |
| Model 4 <sup>d</sup>                                                                                                                                                                                                                                                                                                                                                                                                                                                | <b>1.30(1.17-1.48)</b> | <b>1.58(1.27-2.24)</b>                                            | <b>1.22(1.08-1.38)</b>                                        |
| Model 5 <sup>e</sup>                                                                                                                                                                                                                                                                                                                                                                                                                                                | <b>1.29(1.16-1.44)</b> | <b>1.54(1.24-1.92)</b>                                            | <b>1.22(1.08-1.38)</b>                                        |
| Model 4 + CES-D x self-reported health                                                                                                                                                                                                                                                                                                                                                                                                                              |                        | p-value for the interaction term - <b>0.03</b>                    |                                                               |
| <b>Cancer Death (a subset of nonCVD death)</b>                                                                                                                                                                                                                                                                                                                                                                                                                      |                        |                                                                   |                                                               |
| Events, n                                                                                                                                                                                                                                                                                                                                                                                                                                                           | 1226                   | 475                                                               | 751                                                           |
| Crude                                                                                                                                                                                                                                                                                                                                                                                                                                                               | <b>1.27(1.09-1.53)</b> | <b>1.53(1.11-2.12)</b>                                            | 1.06(0.87-1.29)                                               |
| Model 1 <sup>a</sup>                                                                                                                                                                                                                                                                                                                                                                                                                                                | <b>1.29(1.09-1.53)</b> | <b>1.45(1.04-2.01)</b>                                            | 1.16(0.95-1.42)                                               |
| Model 2 <sup>b</sup>                                                                                                                                                                                                                                                                                                                                                                                                                                                | <b>1.25(1.05-1.48)</b> | <b>1.40(1.01-1.95)</b>                                            | 1.14(0.93-1.40)                                               |
| Model 3 <sup>c</sup>                                                                                                                                                                                                                                                                                                                                                                                                                                                | <b>1.20(1.01-1.43)</b> | 1.35(0.97-1.88)                                                   | 1.11(0.91-1.36)                                               |
| Model 4 <sup>d</sup>                                                                                                                                                                                                                                                                                                                                                                                                                                                | 1.16(0.96-1.39)        | 1.37(0.97-1.92)                                                   | 1.08(0.87-1.33)                                               |
| Model 5 <sup>e</sup>                                                                                                                                                                                                                                                                                                                                                                                                                                                | 1.15(0.96-1.38)        | 1.36(0.97-1.91)                                                   | 1.08(0.90-1.34)                                               |
| Model 4 + CES-D x self-reported health                                                                                                                                                                                                                                                                                                                                                                                                                              |                        | p-value for the interaction term - 0.20                           |                                                               |
| <sup>a</sup> Model 1 adjusts for <i>socio-demographics</i> (age, gender, region, income, health insurance, education)                                                                                                                                                                                                                                                                                                                                               |                        |                                                                   |                                                               |
| <sup>b</sup> Model 2 adds to model 1 <i>medical conditions, physiological factors and medication use</i> (systolic blood pressure, total cholesterol, high density lipoprotein-cholesterol, use of aspirin, statins, antihypertensives, antidepressants, body mass index, logarithmically transformed Albumin to Creatinine Ratio; diabetes, cardiovascular disease, medication use as a proxy for chronic obstructive pulmonary disease, and cognitive impairment) |                        |                                                                   |                                                               |
| <sup>c</sup> Model 3 adds to model 2 <i>behavioral risk factors</i> (pack-years of cigarette smoking, self-reported alcohol use, physical inactivity, medication non-adherence).                                                                                                                                                                                                                                                                                    |                        |                                                                   |                                                               |

---

<sup>d</sup>Model 4 adds to model 3 *other factors* (physical health component score of SF-12, log-transformed high sensitivity C-reactive protein and perceived stress)

<sup>e</sup>Model 5 adds non-fatal CVD event – first nonfatal myocardial infarction or stroke since baseline.

HR = hazard ratio; CVD cardiovascular disease; CES-D = Centers for Epidemiology Studies-Depression

**Bold p-value < 0.05**; Missing data in covariates imputed using chained equations.

---

### *Sensitivity Analyses:*

The mean follow-up time was 6.5 (SD = 2.3) years, with a median [interquartile range] of 6.9 [5.4-8.3] years. Baseline depressive symptoms were significantly associated with all-cause mortality (aHR 1.18, 95%CI 1.07-1.29) and nonCVD death (aHR 1.21, 95%CI 1.08-1.36) and approached significance for CVD death (aHR 1.10, 95%CI 0.94-1.29) and cancer death (aHR 1.12, 95%CI 0.93-1.36), even in the exploratory models (Model 3). The results appeared to be particularly robust amongst those with excellent or very good health: cancer death (aHR 1.49, 95%CI 1.03-2.13), CVD death (aHR 1.63, 95%CI 1.16-2.30), nonCVD death (aHR 1.48, 95%CI 1.15-1.89) and all-cause mortality (aHR 1.53, 95% CI 1.25-1.88). In Model 4, the p values for depressive symptoms x health status interaction term was 0.003 (all-cause mortality), 0.01 (CVD death), 0.06 (nonCVD death), and 0.07 (cancer death). Results were similar without multiple imputations within 2 decimal places

**(Table 3)**

**Table 3. Association of baseline elevated depressive symptoms (CES-D $\geq$ 4) with mortality outcomes. Each participant contributes 1 measure of CES-D at baseline.**

|                                                    | Overall<br>n=29,491    | Self-reported general<br>health as "excellent or<br>very good"<br>n=13,711 | Self-reported general health<br>as "poor, fair or good"<br>n=15,780 |
|----------------------------------------------------|------------------------|----------------------------------------------------------------------------|---------------------------------------------------------------------|
|                                                    | HR (95%CI)             | HR (95%CI)                                                                 | HR (95%CI)                                                          |
| <b>All-cause mortality</b>                         | <b>4581</b>            | <b>1392</b>                                                                | <b>3189</b>                                                         |
| Crude                                              | <b>1.54(1.42-1.68)</b> | <b>1.91(1.59-2.31)</b>                                                     | <b>1.18(1.07-1.30)</b>                                              |
| Model 1 <sup>a</sup>                               | <b>1.57(1.44-1.72)</b> | <b>1.76(1.45-2.12)</b>                                                     | <b>1.34(1.21-1.47)</b>                                              |
| Model 2 <sup>b</sup>                               | <b>1.32(1.25-1.49)</b> | <b>1.61(1.33-1.96)</b>                                                     | <b>1.22(1.11-1.35)</b>                                              |
| Model 3 <sup>c</sup>                               | <b>1.32(1.27-1.44)</b> | <b>1.56(1.29-1.90)</b>                                                     | <b>1.20(1.09-1.32)</b>                                              |
| Model 4 <sup>d</sup>                               | <b>1.18(1.07-1.29)</b> | <b>1.53(1.25-1.88)</b>                                                     | 1.09(0.98-1.20)                                                     |
| Model 4 + baseline CES-D<br>x self-reported health |                        |                                                                            | p-value for the interaction term - <b>0.002</b>                     |
| <b>CVD Death</b>                                   | <b>1551</b>            | <b>437</b>                                                                 | <b>1114</b>                                                         |
| Crude                                              | <b>1.55(1.34-1.78)</b> | <b>2.16(1.58-2.96)</b>                                                     | <b>1.13(0.97-1.33)</b>                                              |
| Model 1 <sup>a</sup>                               | <b>1.57(1.35-1.81)</b> | <b>1.96(1.42-2.71)</b>                                                     | <b>1.29(1.10-1.52)</b>                                              |
| Model 2 <sup>b</sup>                               | <b>1.28(1.10-1.48)</b> | <b>1.71(1.23-2.38)</b>                                                     | 1.14(0.97-1.34)                                                     |
| Model 3 <sup>c</sup>                               | <b>1.24(1.07-1.44)</b> | <b>1.70(1.22-2.36)</b>                                                     | 1.11(0.94-1.31)                                                     |
| Model 4 <sup>d</sup>                               | 1.10(0.94-1.29)        | <b>1.63(1.16-2.30)</b>                                                     | 1.00(0.84-1.20)                                                     |
| Model 4 + baseline CES-D<br>x self-reported health |                        |                                                                            | p-value for the interaction term - <b>0.01</b>                      |
| <b>NonCVD Death</b>                                | <b>3030</b>            | <b>955</b>                                                                 | <b>2075</b>                                                         |
| Crude                                              | <b>1.54(1.39-1.71)</b> | <b>1.80(1.42-2.26)</b>                                                     | <b>1.21(1.08-1.35)</b>                                              |
| Model 1 <sup>a</sup>                               | <b>1.57(1.42-1.75)</b> | <b>1.66(1.31-2.10)</b>                                                     | <b>1.36(1.21-1.53)</b>                                              |
| Model 2 <sup>b</sup>                               | <b>1.41(1.26-1.56)</b> | <b>1.56(1.29-1.98)</b>                                                     | <b>1.27(1.13-1.43)</b>                                              |
| Model 3 <sup>c</sup>                               | <b>1.36(1.22-1.51)</b> | <b>1.49(1.17-1.90)</b>                                                     | <b>1.25(1.11-1.41)</b>                                              |
| Model 4 <sup>d</sup>                               | <b>1.21(1.08-1.36)</b> | <b>1.48(1.15-1.89)</b>                                                     | <b>1.14(1.00-1.29)</b>                                              |
| Model 4 + baseline CES-D<br>x self-reported health |                        |                                                                            | p-value for the interaction term - <b>0.06</b>                      |
| <b>Cancer Death (a subset of<br/>nonCVD death)</b> | <b>1226</b>            | <b>475</b>                                                                 | <b>751</b>                                                          |
| Crude                                              | <b>1.21(1.02-1.44)</b> | <b>1.63(1.16-2.30)</b>                                                     | 0.97(0.79-1.19)                                                     |
| Model 1 <sup>a</sup>                               | <b>1.27(1.06-1.52)</b> | <b>1.58(1.12-2.23)</b>                                                     | 1.09(0.89-1.35)                                                     |
| Model 2 <sup>b</sup>                               | <b>1.22(1.02-1.47)</b> | <b>1.53(1.08-2.17)</b>                                                     | 1.07(0.87-1.33)                                                     |
| Model 3 <sup>c</sup>                               | 1.17(0.98-1.41)        | <b>1.45(1.02-2.05)</b>                                                     | 1.05(0.85-1.30)                                                     |
| Model 4 <sup>d</sup>                               | 1.12(0.93-1.36)        | <b>1.49(1.03-2.13)</b>                                                     | 1.01(0.81-1.27)                                                     |
| Model 4 + baseline CES-D<br>x self-reported health |                        |                                                                            | p-value for the interaction term - <b>0.07</b>                      |

<sup>a</sup>Model 1 adjusts for *socio-demographics* (age, gender, region, income, health insurance, education)  
<sup>b</sup>Model 2 adds to model 1 *medical conditions, physiological factors and medication use* (systolic blood pressure, total cholesterol, high density lipoprotein-cholesterol, use of aspirin, statins, antihypertensives, antidepressants, body mass index, logarithmically transformed Albumin to Creatinine Ratio; diabetes, cardiovascular disease, medication use as a proxy for chronic obstructive pulmonary disease, and cognitive impairment)  
<sup>c</sup>Model 3 adds to model 2 *behavioral risk factors* (pack-years of cigarette smoking, self-reported alcohol use, physical inactivity, medication non-adherence).  
<sup>d</sup>Model 4 adds to model 3 *other factors* (physical health component score of SF-12, log-transformed high sensitivity C-reactive protein and perceived stress)

HR = hazard ratio, CVD cardiovascular disease



---

HR and 95% CI were estimated by Cox proportional hazard regression models. Bold p-value < 0.05; Missing data in covariates imputed using chained equations.

---

## Discussion

To our knowledge, this is the largest study to date to examine the timing of the relationship between depressive symptoms and all-cause and cause-specific mortality in non-institutionalized middle to older aged adults. In this diverse cohort, we found that time-varying depressive symptoms significantly increased the risk of nonCVD and all-cause mortality in fully adjusted models. In fully adjusted models, depressive symptoms increased the risk of cause-specific and all-cause mortality by 36% to 54% in those with a very good/excellent state of health.

Given that depression is a relapsing/remitting disease,<sup>23</sup> this study markedly adds to the literature by demonstrating a time-varying relationship between elevated depressive symptoms and mortality, including cancer death. Major study strengths include the use of 3 measurements of depressive symptoms and stringent physician adjudication of outcomes. We were, however, unable to adjust for other time-varying covariates, which should be addressed in future research. For example, prior research suggests that changes in physical health (e.g., number of debilitating conditions) over time may mediate the relationship between depressive symptoms and mortality.<sup>24</sup>

We are also the first to report a significant moderating effect of self-reported health on the relationship between depressive symptoms and mortality. Many have long asked whether depression leads to mortality or whether individuals are depressed because they are dying. Our findings in those who report excellent states of health is striking and supports the former argument. It may also be that the effect of chronic illness burden on mortality in those with poor health overwhelms the effects of depressive symptoms. Those with excellent health may also fail to



1 recognize/present for depression. In fact, depressed excellent health individuals in our cohort were  
2  
3 less likely to be on an antidepressant. Nonetheless, this finding should be further explored in future  
4  
5 studies.  
6  
7  
8  
9

10 The overall results also have a coherence consistent with prior studies that suggest that depressive  
11  
12 symptoms don't solely predict suicide and CVD mortality, but also predict other causes such as  
13  
14 cancer death.<sup>25</sup> While prior literature suggests that depressive symptoms confer mortality in those  
15  
16 with active cancer,<sup>26</sup> our study excluded active cancer diagnoses confirming a possible relationship  
17  
18 between depressive symptoms and incident cancer mortality. Prior studies have also been limited by  
19  
20 inadequate covariate control, and our results for cancer persisted after adjusting for numerous  
21  
22 traditional and behavioral risk factors, such as smoking, and approached significance even in  
23  
24 models that included physiologic factors.  
25  
26  
27  
28  
29

30  
31 Overall, baseline and time varying analyses were similar. However, while our baseline analyses  
32  
33 suggest that depressive symptoms significantly contribute to cancer death in those with  
34  
35 excellent/very good health, time varying analyses allowed for more accurate analyses in line with  
36  
37 expectations, suggesting a weaker interaction by health status for proximal cancer mortality in this  
38  
39 cohort that excluded those with active malignancy.  
40  
41  
42  
43  
44

45 This study also supports comprehensive evidence-based depression care management in primary  
46  
47 care practices, which have been shown to lower mortality risk.<sup>27</sup> Nonetheless, depression treatment  
48  
49 remains suboptimal in the general population,<sup>28</sup> despite decades of efforts. We too demonstrate that  
50  
51 over time, nearly 40% of patients with elevated depressive symptoms at baseline were still  
52  
53 depressed on average 5 and 7 years later. Given the potentially shorter follow-up times in both  
54  
55  
56  
57  
58  
59  
60

1 time-varying analyses (by virtue of follow-up times being broken up by repeat depression  
2 measures) and baseline analyses (with 6.5 years of follow-up on average), these findings lend  
3 greater urgency to the importance of timely and effective treatment of depressive symptoms to  
4 prevent adverse consequences of depressive symptoms on physical health and mortality.  
5  
6  
7  
8  
9

10  
11 Limitations of our study include the regional specificity, limiting generalizability, and use of the  
12 short form of the CES-D, which measures only emotional and not somatic symptoms of depression.  
13  
14 Schultz (2002) demonstrated variance between studies using scales and interviews,<sup>29</sup> and others  
15 have posited even stronger findings in studies with clinical diagnoses (vs. continuous measures).<sup>30</sup>  
16  
17 However, CES-D scales are one of the most widely used scales in clinical practice and in baseline  
18 depression to outcome studies and have good sensitivity and specificity.<sup>9,15,16</sup> We may also have  
19  
20 been underpowered to examine CVD and cancer mortality, though the directionality of the  
21  
22 estimates remained consistent. The exclusion of active cancer participants as part of the overall  
23  
24 REGARDS study criteria, the rationale of which has previously been described,<sup>14</sup> may also have  
25  
26 contributed to lack of power. Those with a *history* of malignancy or CVD were not specifically  
27  
28 excluded, which is in line with prior depression to mortality studies.<sup>1,9</sup> Nonetheless, our previously  
29  
30 published study, which excluded those with a history of CVD, similarly found a strong relationship  
31  
32 between time-varying depressive symptoms and CVD death.<sup>31</sup>  
33  
34  
35  
36  
37  
38  
39  
40  
41  
42

43 We were also unable to adjust for other psychiatric comorbidities, such as anxiety (though we  
44 included stress) or account for subclinical CVD and/or cancer. In addition, the follow-up time (6.5  
45 years) was relatively short compared to other studies with even shorter follow-up times between  
46  
47 CES-D measures in time-varying analyses, suggesting a short-term effect on mortality. Our results  
48  
49 support prior literature suggesting that shorter follow-up time is associated with greater excess  
50  
51  
52  
53  
54  
55  
56  
57  
58  
59  
60

1 mortality.<sup>9,30</sup> However, we did not formally compare short-term to long-term follow-up nor  
2  
3 persistent to fluctuating depressive symptoms.  
4  
5  
6  
7

8 Given our results of a relationship between time-varying depressive symptoms and mortality,  
9  
10 further research is warranted to test the long-term efficacy of and adherence to depression treatment  
11  
12 and to explore preventive approaches to decreasing premature mortality risk.<sup>32</sup> To our knowledge,  
13  
14 the finding of a relationship between depressive symptoms and mortality in those with excellent or  
15  
16 very good self-reported health is a new finding and should be further studied.  
17  
18  
19  
20  
21  
22  
23  
24  
25  
26  
27  
28  
29  
30  
31  
32  
33  
34  
35  
36  
37  
38  
39  
40  
41  
42  
43  
44  
45  
46  
47  
48  
49  
50  
51  
52  
53  
54  
55  
56  
57  
58  
59  
60

## References

1. Wulsin LR, Vaillant GE, Wells VE. A systematic review of the mortality of depression. *Psychosom Med.* 1999;61:6-17.
2. Sullivan MD, O'Connor P, Feeney P, et al. Depression Predicts All-Cause Mortality: Epidemiological evaluation from the ACCORD HRQL substudy. *Diabetes Care.* 2012;35:1708-1715.
3. Review: depression after myocardial infarction is associated with increased risk of all-cause mortality and cardiovascular events. *Evidence Based Mental Health.* 2013;16:110.
4. Barth J, Schumacher M, Herrmann-Lingen C. Depression as a risk factor for mortality in patients with coronary heart disease: a meta-analysis. *Psychosom Med.* 2004;66:802-813.
5. Cuijpers P, Vogelzangs N, Twisk J, et al. Comprehensive meta-analysis of excess mortality in depression in the general community versus patients with specific illnesses. *Am J Psychiatry.* 2014;171:453-462.
6. Cuijpers P, Smit F. Excess mortality in depression: a meta-analysis of community studies. *J Affect Disord.* 72:227-236.
7. Bruce ML, Leaf PJ, Rozal GP, Florio L, Hoff RA. Psychiatric status and 9-year mortality data in the New Haven Epidemiologic Catchment Area Study. *Am J Psychiatry.* 1994;151:716-721.
8. Surtees PG, Wainwright NW, Luben RN, et al. Depression and ischemic heart disease mortality: evidence from the EPIC-Norfolk United Kingdom prospective cohort study. *Am J Psychiatry.* 2008;165:515-523.
9. Pinquart M, Duberstein PR. Depression and cancer mortality: a meta-analysis. *Psychological medicine.* 2010;40:1797-1810.

10. Mols F, Husson O, Roukema JA, van de Poll-Franse LV. Depressive symptoms are a risk factor for all-cause mortality: results from a prospective population-based study among 3,080 cancer survivors from the PROFILES registry. *J Cancer Surviv.* 2013;7:484-492.
11. Lasserre AM, Marti-Soler H, Strippoli MP, et al. Clinical and course characteristics of depression and all-cause mortality: A prospective population-based study. *J Affect Disord.* 2016;189:17-24.
12. McGee DL, Liao Y, Cao G, Cooper RS. Self-reported Health Status and Mortality in a Multiethnic US Cohort. *Am J Epidemiol.* 1999;149:41-46.
13. Ambresin G, Chondros P, Dowrick C, Herrman H, Gunn JM. Self-Rated Health and Long-Term Prognosis of Depression. *Annals of Family Medicine.* 2014;12:57-65.
14. Howard VJ, Cushman M, Pulley L, et al. The reasons for geographic and racial differences in stroke study: objectives and design. *Neuroepidemiology.* 2005;25:135-143.
15. Melchior LA, Huba GJ, Brown VB, Reback CJ. A Short Depression Index for Women. *Educational and Psychological Measurement.* 1993;53:1117-1125.
16. Radloff LS. The ces-d scale: A self-report depression scale for research in the general population. *Appl Psychol Meas.* 1977;1:385-401.
17. Folstein MF, Folstein SE, McHugh PR. "Mini-mental state". A practical method for grading the cognitive state of patients for the clinician. *J Psychiatr Res.* 1975;12:189-198.
18. Callahan CM, Unverzagt FW, Hui SL, Perkins AJ, Hendrie HC. Six-item screener to identify cognitive impairment among potential subjects for clinical research. *Med Care.* 2002;40:771-781.
19. Morisky DE, Green LW, Levine DM. Concurrent and predictive validity of a self-reported measure of medication adherence. *Med Care.* 1986;24:67-74.

- 1       **20.**   Ware J, Jr., Kosinski M, Keller SD. A 12-Item Short-Form Health Survey: construction of  
2       scales and preliminary tests of reliability and validity. *Med Care.* 1996;34:220-233.
- 3  
4  
5       **21.**   Cohen S, Kamarck T, Mermelstein R. A global measure of perceived stress. *J Health Soc*  
6       *Behav.* 1983;24:385-396.
- 7  
8  
9  
10       **22.**   Simon R, Makuch RW. A non-parametric graphical representation of the relationship  
11       between survival and the occurrence of an event: Application to responder versus non-  
12       responder bias. *Statistics in Medicine.* 1984;3:35-44.
- 13  
14  
15  
16       **23.**   Lin EH, Katon WJ, VonKorff M, et al. Relapse of depression in primary care. Rate and  
17       clinical predictors. *Arch Fam Med.* 1998;7:443-449.
- 18  
19  
20  
21       **24.**   Houle JN. Depressive symptoms and all-cause mortality in a nationally representative  
22       longitudinal study with time-varying covariates. *Psychosom Med.* 2013;75:297-304.
- 23  
24  
25  
26       **25.**   Mykletun A, Bjerkeset O, Dewey M, et al. Anxiety, depression, and cause-specific  
27       mortality: the HUNT study. *Psychosom Med.* 2007;69:323-331.
- 28  
29  
30  
31       **26.**   Satin JR, Linden W, Phillips MJ. Depression as a predictor of disease progression and  
32       mortality in cancer patients: a meta-analysis. *Cancer.* 2009;115:5349-5361.
- 33  
34  
35  
36       **27.**   Gallo JJ, Morales KH, Bogner HR, et al. Long term effect of depression care management  
37       on mortality in older adults: follow-up of cluster randomized clinical trial in primary care.  
38       *BMJ.* 2013;346:f2570.
- 39  
40  
41  
42       **28.**   González HM, Vega WA, Williams DR, et al. Depression care in the united states: Too little  
43       for too few. *Arch Gen Psychiatry.* 2010;67:37-46.
- 44  
45  
46  
47       **29.**   Schulz R, Drayer RA, Rollman BL. Depression as a risk factor for non-suicide mortality in  
48       the elderly. *Biol Psychiatry.* 2002;52:205-225.
- 49  
50  
51  
52       **30.**   Pan A, Sun Q, Okereke OI, Rexrode KM, Hu FB. Depression and risk of stroke morbidity  
53       and mortality: a meta-analysis and systematic review. *JAMA.* 2011;306:1241-1249.
- 54  
55  
56  
57  
58  
59  
60

- 1  
2  
3  
4  
5  
6  
7  
8  
9  
10  
11  
12  
13  
14  
15  
16  
17  
18  
19  
20  
21  
22  
23  
24  
25  
26  
27  
28  
29  
30  
31  
32  
33  
34  
35  
36  
37  
38  
39  
40  
41  
42  
43  
44  
45  
46  
47  
48  
49  
50  
51  
52  
53  
54  
55  
56  
57  
58  
59  
60
- 31.** Moise N, Khodneva Y, Richman J, et al. Elucidating the Association Between Depressive Symptoms, Coronary Heart Disease, and Stroke in Black and White Adults: The REasons for Geographic And Racial Differences in Stroke (REGARDS) Study. *J Am Heart Assoc.* 2016;5.
- 32.** Kuyken W, Warren FC, Taylor RS, et al. Efficacy of Mindfulness-Based Cognitive Therapy in Prevention of Depressive Relapse: An Individual Patient Data Meta-analysis From Randomized Trials. *JAMA Psychiatry.* 2016;73:565-574.

## ACKNOWLEDGEMENTS

**Funding:** This research project is supported by a cooperative agreement U01 NS041588 from the National Institute of Neurological Disorders and Stroke, National Institutes of Health, Department of Health and Human Service. The REGARDS study was supported by NIH grant 2U01NS041588; REGARDS-MI study was supported by NIH grants R01 HL080477 and K24 HL111154. The content is solely the responsibility of the authors and does not necessarily represent the official views of the National Institute of Neurological Disorders and Stroke or the National Institutes of Health. Representatives of the funding agency have been involved in the review of the manuscript but not directly involved in the collection, management, analysis, or interpretation of the data. The authors thank the other investigators, the staff, and the participants of the REGARDS study for their valuable contributions. A full list of participating REGARDS investigators and institutions can be found at <http://www.regardsstudy.org>. This work was also supported by funds from NHLBI (3 R01 HL114924-03S1; HL080477; and K24 HL111154).

**Disclosures:** All authors have completed the ICMJE uniform disclosure form at [www.icmje.org/coi\\_disclosure.pdf](http://www.icmje.org/coi_disclosure.pdf) and declare: no support from any organisation for the submitted work; no financial relationships with any organisations that might have an interest in the submitted work in the previous three years; no other relationships or activities that could appear to have influenced the submitted work.

**Author Contributions:** Drs. Yulia Khodneva and Joshua Richman had full access to all the data in the study and take responsibility for the integrity of the data and the accuracy of the data analysis. *Study concept and design:* Moise, Khodneva, Safford; *Acquisition of data:* Khodneva, Safford; *Analysis and interpretation of data:* Khodneva, Moise, Jannat-Khah, Richman, Kronish, Shaffer, Safford; *Drafting of the manuscript:* Moise, Khodneva *Critical revision of manuscript for important intellectual content:* Moise, Khodneva, Jannat-Khah, Richman, Kronish, Davidson,



1 Shaffer, Safford; *Statistical analysis*: Khodneva, Jannat-Khah; *Obtained funding*: Safford; *Study*  
2  
3 *supervision*: Safford  
4

5 **Conflict of Interest:** None  
6  
7

8  
9 **Copyright:** The Corresponding Author has the right to grant on behalf of all authors and does grant  
10 on behalf of all authors, a worldwide licence to the Publishers and its licensees in perpetuity, in all  
11 forms, formats and media (whether known now or created in the future), to i) publish, reproduce,  
12 distribute, display and store the Contribution, ii) translate the Contribution into other languages,  
13 create adaptations, reprints, include within collections and create summaries, extracts and/or,  
14 abstracts of the Contribution, iii) create any other derivative work(s) based on the Contribution, iv)  
15 to exploit all subsidiary rights in the Contribution, v) the inclusion of electronic links from the  
16 Contribution to third party material where-ever it may be located; and, vi) licence any third party to  
17 do any or all of the above.  
18  
19

20  
21 **Transparency:** Dr. Moise affirms that the manuscript is an honest, accurate, and transparent  
22 account of the study being reported; that no important aspects of the study have been omitted; and  
23 that any discrepancies from the study as planned (and, if relevant, registered) have been explained.  
24  
25

26  
27 **Data Sharing:** Patient level data or full dataset or technical appendix or statistical code are  
28 available if deemed important by reviewers with open access by Monika Safford at Weill Cornell,  
29 Nathalie Moise at Columbia University Medical Center, and Yulia Khodneva at University of  
30 Alabama at Birmingham. Patient consent was not obtained but the presented data are anonymised  
31 and risk of identification is low.  
32  
33  
34  
35  
36  
37  
38  
39  
40  
41  
42  
43  
44  
45  
46  
47  
48  
49  
50  
51  
52  
53  
54  
55  
56  
57  
58  
59  
60

1  
2  
3  
4  
5  
6  
7  
8  
9  
10  
11  
12  
13  
14  
15  
16  
17  
18  
19  
20  
21  
22  
23  
24  
25  
26  
27  
28  
29  
30  
31  
32  
33  
34  
35  
36  
37  
38  
39  
40  
41  
42  
43  
44  
45  
46  
47  
48  
49  
50  
51  
52  
53  
54  
55  
56  
57  
58  
59  
60

**Figure Legend**

**Figure 1.** Cohort Flow Diagram: Exclusion cascade of depressive symptoms to mortality endpoints analysis.

For peer review only

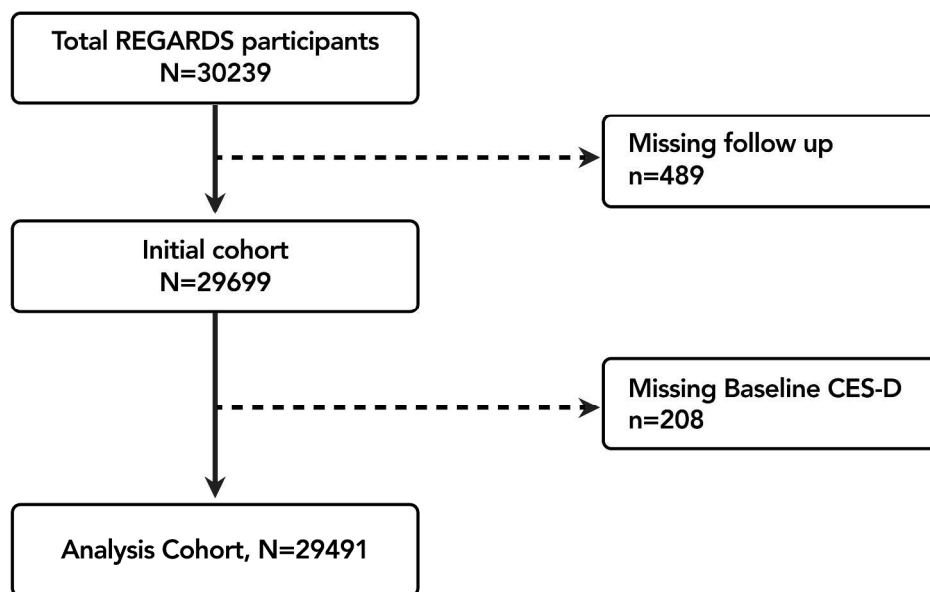

Figure 1. Consort Diagram

279x215mm (300 x 300 DPI)

## Supplementary Material

**eTable 1. Proportion of persons with elevated depressive symptoms by baseline self-reported health status (original categories, without collapsing).**

| Self-reported general health | Baseline                      |               |          | Second CES-D                    |               |          | Third CES-D                      |               |          |
|------------------------------|-------------------------------|---------------|----------|---------------------------------|---------------|----------|----------------------------------|---------------|----------|
|                              | CES-D<4, n, %                 | CES-D≥4, n, % | Total, n | CESD<4, n, %                    | CES-D≥4, n, % | Total, n | CESD<4, n, %                     | CES-D≥4, n, % | Total, n |
| <b>Excellent</b>             | 4515<br>95.9 %                | 195<br>4.1%   | 4710     | 3444<br>94.7%                   | 194<br>5.3%   | 3638     | 2109<br>94.6%                    | 120<br>5.4%   | 2229     |
| <b>Very good</b>             | 8450<br>94.1%                 | 530<br>5.9%   | 8980     | 6332<br>93.0%                   | 478<br>7.0%   | 6810     | 3938<br>92.8%                    | 305<br>7.2%   | 4243     |
| <b>Good</b>                  | 9181<br>89.1%                 | 1124<br>10.9% | 10305    | 6363<br>88.6%                   | 818<br>11.4%  | 7181     | 3717<br>88.9%                    | 464<br>11.1%  | 4181     |
| <b>Fair</b>                  | 3424<br>77.8 %                | 975<br>22.2 % | 4399     | 2185<br>79.7%                   | 556<br>20.3%  | 2741     | 1236<br>82.0%                    | 271<br>18.0%  | 1507     |
| <b>Poor</b>                  | 614<br>59.2%                  | 424<br>40.9%  | 1038     | 322<br>61.2%                    | 204<br>38.8%  | 526      | 177<br>65.3%                     | 94<br>34.7%   | 271      |
|                              |                               |               | 29432    |                                 |               | 20896    |                                  |               | 12431    |
|                              | <b>Frequency Missing = 59</b> |               |          | <b>Frequency Missing = 8595</b> |               |          | <b>Frequency Missing = 17060</b> |               |          |

**eTable 2. Reasons for non-cardiovascular disease death in the REGARDS study**

| <i>Causes of Death</i>            | Overall                 |         | Self-reported general health as “excellent or very good”<br>n=13,711 |                         | Self-reported general health as “poor, fair or good”<br>n=15,780 |         |
|-----------------------------------|-------------------------|---------|----------------------------------------------------------------------|-------------------------|------------------------------------------------------------------|---------|
|                                   | n                       | Percent | Frequency                                                            | Percent                 | Frequency                                                        | Percent |
| Cancer                            | 1226                    | 44.3    | 474                                                                  | 54.0                    | 747                                                              | 39.7    |
| Accidents/Injury/Suicide/Homicide | 164                     | 5.9     | 52                                                                   | 5.9                     | 111                                                              | 5.9     |
| Suicide                           | 3                       | 0.1     | 2                                                                    | 0.2                     | 1                                                                | 0.05    |
| Liver disease                     | 56                      | 2.0     | 14                                                                   | 1.6                     | 42                                                               | 2.2     |
| Infection                         | 498                     | 18.0    | 132                                                                  | 15.0                    | 365                                                              | 19.4    |
| ESRD                              | 119                     | 4.3     | 23                                                                   | 2.6                     | 95                                                               | 5.1     |
| Dementia                          | 187                     | 6.8     | 74                                                                   | 8.4                     | 112                                                              | 6.0     |
| COPD                              | 247                     | 8.9     | 43                                                                   | 4.9                     | 204                                                              | 10.9    |
| Pulmonary Embolism                | 38                      | 1.34    | 11                                                                   | 1.3                     | 27                                                               | 1.4     |
| Other                             | 232                     | 8.4     | 55                                                                   | 6.3                     | 177                                                              | 9.4     |
|                                   | Frequency Missing = 263 |         |                                                                      | Frequency Missing = 272 |                                                                  |         |

**eFigure 1. Percent of participants with depression measured at baseline who had their second and third follow up measured by years of follow up.**

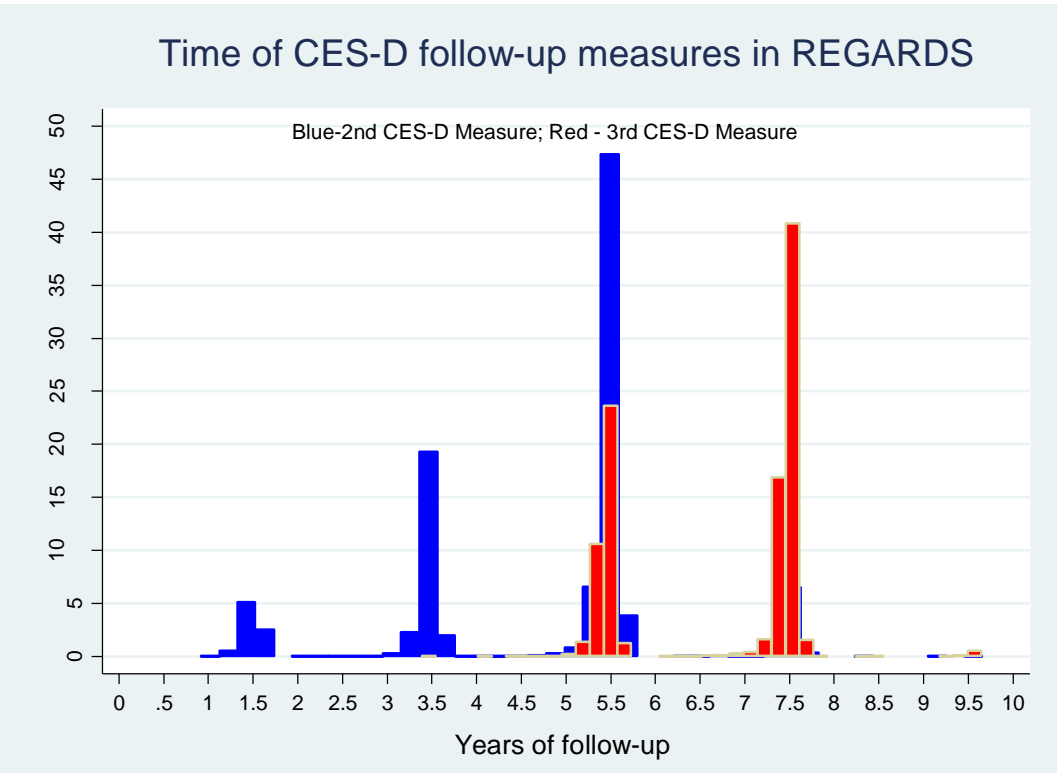

\*"Percent" is a proportion of participants reporting CES-D scores at certain times of all participants available for either 2<sup>nd</sup> follow-up (blue) or 3<sup>rd</sup> follow-up (red).

Time since preceding measurement (baseline or second follow-up), years

|              | Participants, n | Mean | SD  | Minimum | Maximum |
|--------------|-----------------|------|-----|---------|---------|
| Second CES-D | 20934           | 4.8  | 1.5 | 0.9     | 9.7     |
| Third CES-D  | 12451           | 2.1  | 0.4 | 1.0     | 4.2     |

eFigure 2. Timing of CES-D follow up measures in REGARDS by self reported health at baseline.

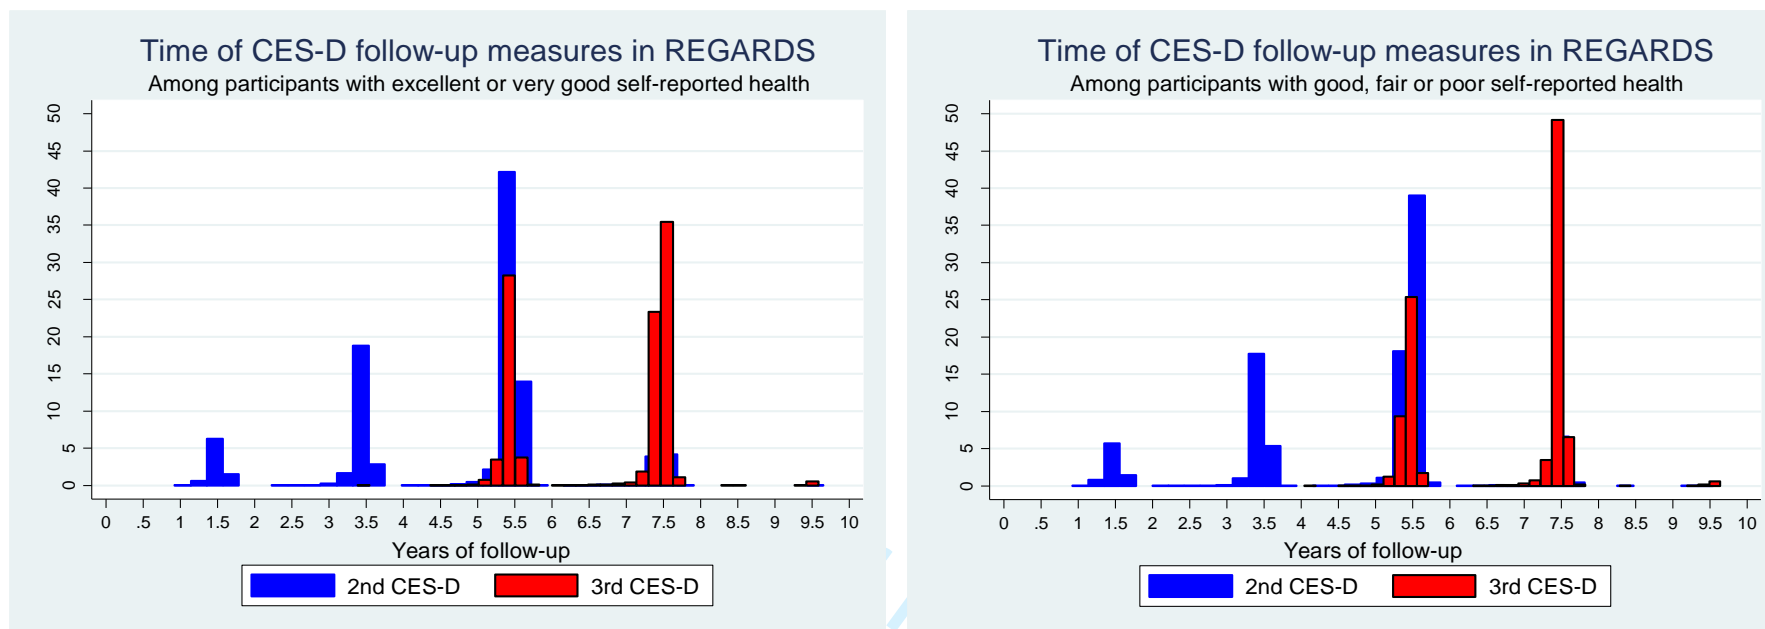

\*"Percent" is a proportion of participants reporting CES-D scores at certain times, of all participants available for either 2<sup>nd</sup> follow-up (blue) or 3<sup>rd</sup> follow-up (red).

|              | Self-reported general health as "excellent or very good" |                                                                              |     |         |         | Self-reported general health as "poor, fair or good" |                                                                              |     |         |         |
|--------------|----------------------------------------------------------|------------------------------------------------------------------------------|-----|---------|---------|------------------------------------------------------|------------------------------------------------------------------------------|-----|---------|---------|
|              |                                                          | Time since preceding CES-D measurement (baseline or second follow-up), years |     |         |         |                                                      | Time since preceding CES-D measurement (baseline or second follow-up), years |     |         |         |
|              | N                                                        | Mean                                                                         | SD  | Minimum | Maximum | N                                                    | Mean                                                                         | SD  | Minimum | Maximum |
| Second CES-D | 10448                                                    | 4.8                                                                          | 1.5 | 0.9     | 9.7     | 10448                                                | 4.8                                                                          | 1.5 | 0.9     | 9.5     |
| Third CES-D  | 6472                                                     | 2.1                                                                          | 0.4 | 1.7     | 4.2     | 5959                                                 | 2.1                                                                          | 0.5 | 1.0     | 4.2     |

**eTable 3. Baseline characteristics of REGARDS participants who had all 3 CES-D measures vs. those with 1 or 2 CES-D measures**

| Characteristics                                          | 1 or 2 CES-D<br>measures<br>(n=17,040) | All 3 CES-D<br>measures<br>(n=12, 451) | <i>p</i> value |
|----------------------------------------------------------|----------------------------------------|----------------------------------------|----------------|
| <b><i>Socio-demographics</i></b>                         |                                        |                                        |                |
| Age, <i>M</i> (SD)                                       | 65.0 +- 10.0                           | 64.7 +- 8.5                            | 0.0069         |
| Female, n (%)                                            | 9300 (54.6)                            | 6945 (55.8)                            | 0.04           |
| African American, n (%)                                  | 7709 (45.2)                            | 4420 (35.5)                            | <.001          |
| Less than high school education, n (%)                   | 2583 (15.2)                            | 1113 (8.9)                             | <.001          |
| Annual Household Income, n (%)                           |                                        |                                        | <.001          |
| Less than \$20,000                                       | 3549 (20.8)                            | 1773 (14.2)                            |                |
| No Health Insurance, n (%)                               | 1290 (7.6)                             | 636 (5.1)                              | <.001          |
| Region, n (%)                                            |                                        |                                        | <.001          |
| Stroke belt                                              | 5806 (34.1)                            | 4387 (35.2)                            |                |
| Stroke buckle                                            | 3887 (22.8)                            | 2301 (18.5)                            |                |
| Non-stroke belt or buckle                                | 7347 (43.1)                            | 5763 (46.3)                            |                |
| <b><i>General health and medical conditions</i></b>      |                                        |                                        |                |
| Self-reported general health, n (%)                      |                                        |                                        | <.001          |
| Poor, fair, good                                         | 9783 (57.5)                            | 5959 (47.9)                            |                |
| Excellent, very good                                     | 7218 (42.5)                            | 6472 (52.1)                            |                |
| Cardiovascular disease (CHD, stroke, PAD, AA), n (%)     | 4379 (25.7)                            | 2446 (19.6)                            | <.001          |
| Diabetes, n (%)                                          | 4083 (25.0)                            | 2169 (18.0)                            | <.001          |
| COPD, n (%)                                              | 1612 (9.5)                             | 1098 (8.8)                             | 0.05           |
| Physical component score on SF-12 scale, <i>M</i> (SD)   | 45.5 +- 11.0                           | 47.6 +- 9.9                            | <.001          |
| <b><i>Physiological risk factors</i></b>                 |                                        |                                        |                |
| Body Mass Index, kg/m <sup>2</sup> , <i>M</i> (SD)       | 29.4 +- 6.3                            | 29.2 +- 6.0                            | 0.0024         |
| Systolic Blood Pressure, mmHg, <i>M</i> (SD)             | 128.0 +- 17.2                          | 127.0 +- 15.9                          | <.001          |
| Total Cholesterol, mg/dL, <i>M</i> (SD)                  | 192.2 +- 41.0                          | 191.9 +- 39.0                          | 0.5732         |
| High-Density Lipoprotein, mg/dL, <i>M</i> (SD)           | 51.4 +- 16.1                           | 52.4 +- 16.3                           | <.001          |
| QT Interval, corrected for heart rate, ms, <i>M</i> (SD) | 408.4 +- 24.2                          | 406.3 +- 22.7                          | <.001          |
| High-Sensitivity C-Reactive Protein, mg/L, median, IQR   | 2.3[1.0-5.4]                           | 2.1[0.9-4.7]                           | <.001          |



|    |                                                      |               |               |       |
|----|------------------------------------------------------|---------------|---------------|-------|
| 1  | Albumin to Creatinine Ratio, mg/g, median,           |               |               |       |
| 2  | IQR                                                  | 7.9[4.8-18.7] | 6.9[4.5-13.5] | <.001 |
| 3  | <b>Medications</b>                                   |               |               |       |
| 4  | Antihypertensive medication use, n (%)               | 9079 (53.9)   | 6118 (49.7)   | <.001 |
| 5  | Statin use, n (%)                                    | 5344 (31.4)   | 3951 (31.8)   | 0.53  |
| 6  | Aspirin use, n (%)                                   | 7297 (42.8)   | 5493 (44.1)   | 0.03  |
| 7  | Antidepressant use, n (%)                            | 2440 (14.4)   | 1646 (13.2)   | 0.006 |
| 8  | <b>Behavioral risk factors</b>                       |               |               |       |
| 9  |                                                      |               |               |       |
| 10 | Self-reported smoking, pack years, <i>M</i> (SD)     | 14.5 +- 24.4  | 12.2 +- 21.0  | <.001 |
| 11 | Current Smoking, n(%)                                | 2786 (16.4)   | 1477 (11.9)   | <.001 |
| 12 | Alcohol use, n (%)                                   |               |               | <.001 |
| 13 | Heavy                                                | 652 (3.9)     | 520 (4.2)     |       |
| 14 | Moderate                                             | 5180 (31.1)   | 4446 (36.3)   |       |
| 15 | None                                                 | 10822 (65.0)  | 7294 (59.5)   |       |
| 16 | Physical inactivity, n (%)                           | 6150 (36.7)   | 3854 (31.3)   | <.001 |
| 17 | Medication non-adherence, n (%)                      | 4548 (29.6)   | 3411 (29.9)   | 0.59  |
| 18 | Impaired cognitive status (Cognitive score $\leq$ 4) | 1300 (9.4)    | 588 (5.9)     | <.001 |
| 19 | Elevated perceived stress (PSS $\geq$ 5)             | 5437 (31.9)   | 3154 (25.3)   | <.001 |

22 *p* Values from chi square, Student t tests. CES-D = Centers for Epidemiology Studies – Depression scale. CVD =  
 23 cardiovascular disease. IQR = interquartile range. *M* = mean. SD = standard deviation.

24 Stroke Belt defined as the states of Alabama, Arkansas, Louisiana, Mississippi, Tennessee and the noncoastal regions  
 25 within the states of North Carolina, South Carolina and Georgia. Stroke buckle defined as coastal regions within the states  
 26 of North Carolina, South Carolina and Georgia.

27 Diabetes defined as fasting blood glucose  $\geq$ 126 or random glucose  $>$ 200 mL/dL or oral hypoglycemic or insulin use. CVD  
 28 defined as baseline coronary heart disease, stroke, periphery artery disease or aortic aneurism.

eFigure 3. Simon and Makuch plots of time-varying depressive symptoms and all-cause mortality, cardiovascular disease death, noncardiovascular disease death and cancer death.

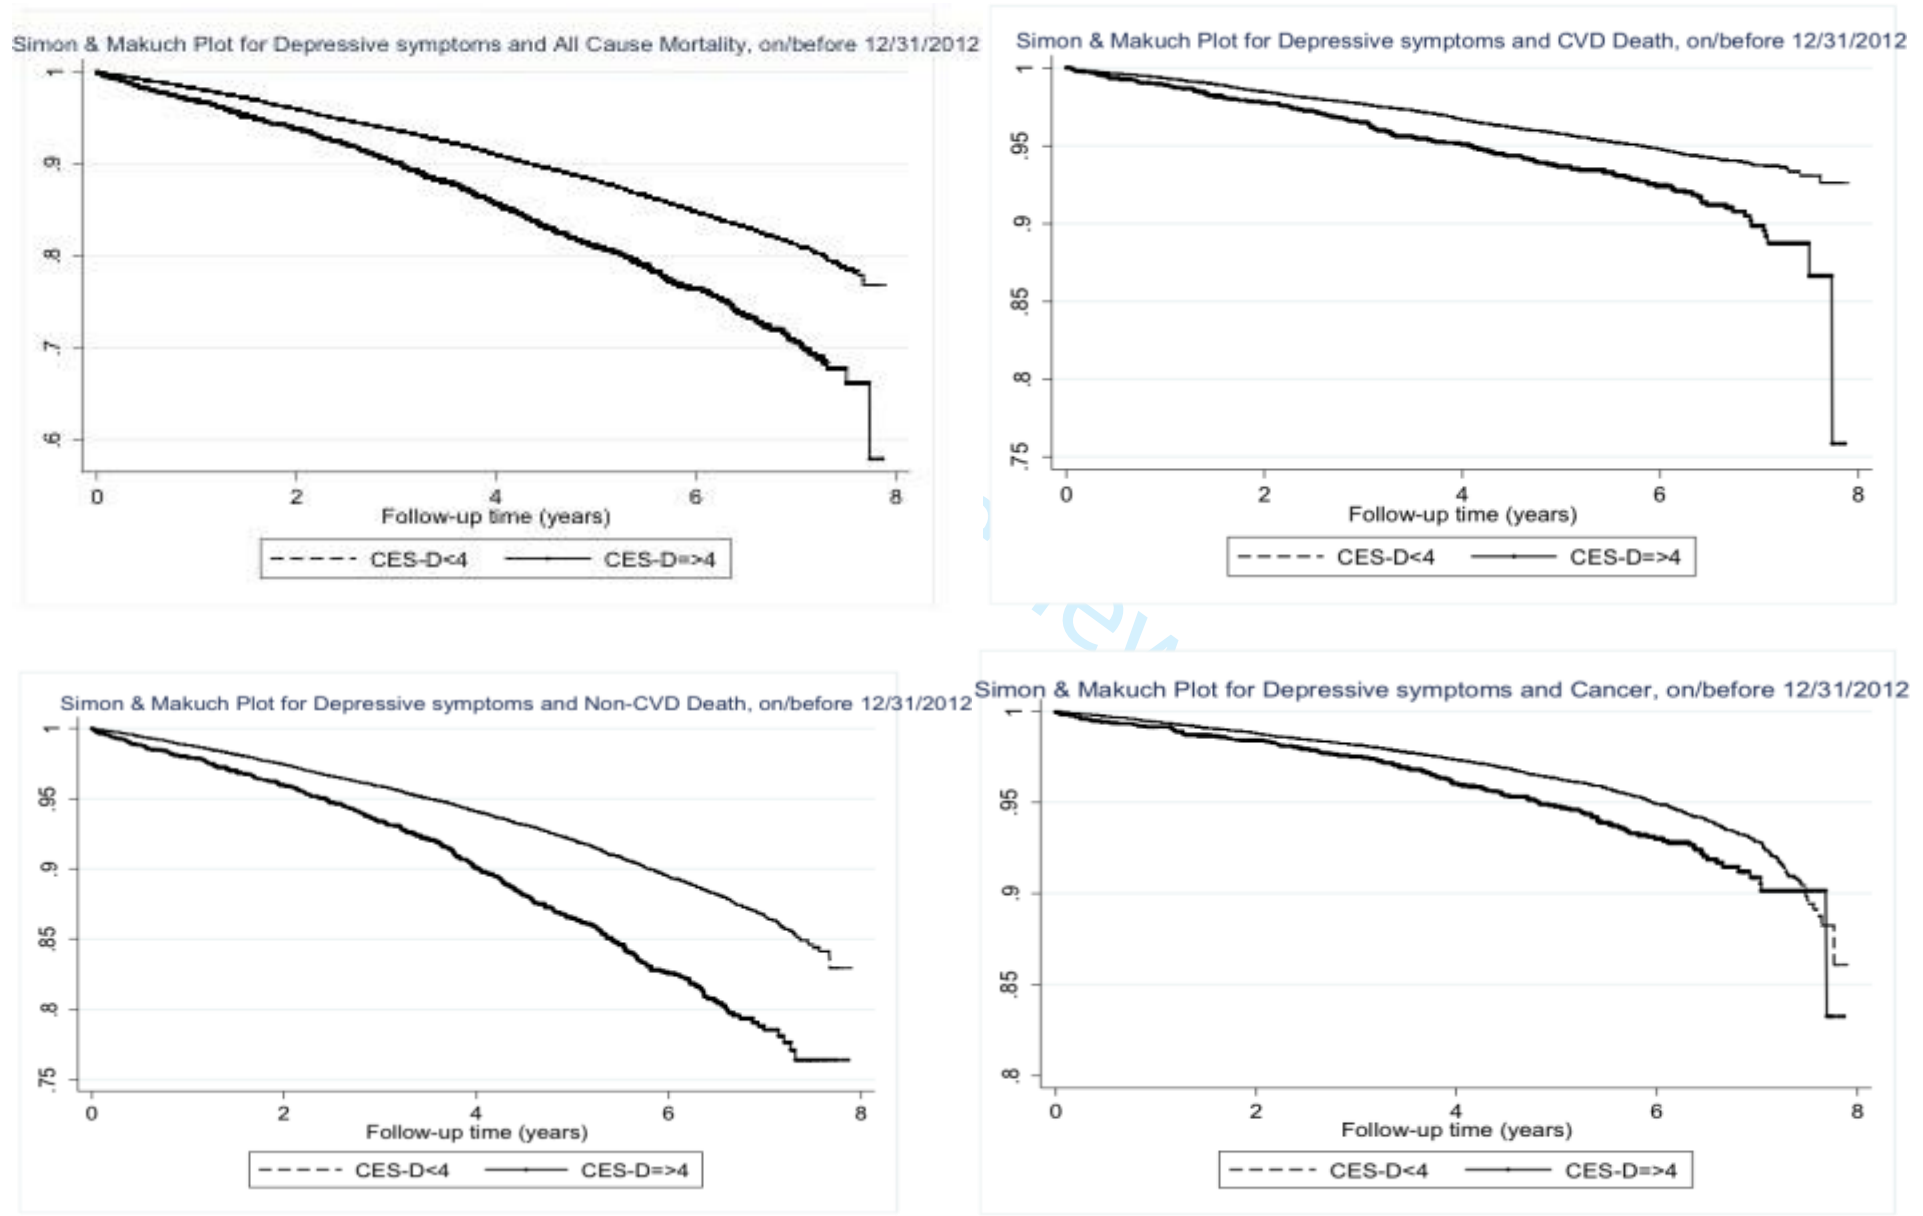

STROBE Statement—Checklist of items that should be included in reports of *cohort studies*

|                           | Item No/Page #    | Recommendation                                                                                                                                                                 |
|---------------------------|-------------------|--------------------------------------------------------------------------------------------------------------------------------------------------------------------------------|
| <b>Title and abstract</b> | 1 (page 1-3)      | (a) Indicate the study's design with a commonly used term in the title or the <b>abstract</b>                                                                                  |
|                           | (Page 2-3)        | (b) Provide in the abstract an informative and balanced summary of what was done and what was found                                                                            |
| <b>Introduction</b>       |                   |                                                                                                                                                                                |
| Background/rationale      | 2 (Page 4)        | Explain the scientific background and rationale for the investigation being reported                                                                                           |
| Objectives                | 3 (pages 4-5)     | State specific objectives, including any prespecified hypotheses                                                                                                               |
| <b>Methods</b>            |                   |                                                                                                                                                                                |
| Study design              | 4 (Page 5 and 6)  | Present key elements of study design early in the paper                                                                                                                        |
| Setting                   | 5 (page 5-10),    | Describe the setting, locations, and relevant dates, including periods of recruitment, exposure, follow-up, and data collection                                                |
| Participants              | 6 (page 5-6, 8-9) | (a) Give the eligibility criteria, and the sources and methods of selection of participants. Describe methods of follow-up                                                     |
|                           | n/a               | (b) For matched studies, give matching criteria and number of exposed and unexposed                                                                                            |
| Variables                 | 7 (page 6-8)      | Clearly define all outcomes, exposures, predictors, potential confounders, and effect modifiers. Give diagnostic criteria, if applicable                                       |
| Data sources/ measurement | 8 (pages 6-9)     | For each variable of interest, give sources of data and details of methods of assessment (measurement). Describe comparability of assessment methods if there is more than one |

|                        |                 |                                                                                                                                                                                                   |
|------------------------|-----------------|---------------------------------------------------------------------------------------------------------------------------------------------------------------------------------------------------|
|                        |                 | group                                                                                                                                                                                             |
| Bias                   | 9 (page 8-10)   | Describe any efforts to address potential sources of bias                                                                                                                                         |
| Study size             | 10 (page 10)    | Explain how the study size was arrived at                                                                                                                                                         |
| Quantitative variables | 11 (page 6-10)  | Explain how quantitative variables were handled in the analyses. If applicable, describe which groupings were chosen and why                                                                      |
| Statistical methods    | 12 (page 8-10)  | (a) Describe all statistical methods, including those used to control for confounding                                                                                                             |
|                        | Pages 9         | (b) Describe any methods used to examine subgroups and interactions                                                                                                                               |
|                        | Page 10         | (c) Explain how missing data were addressed                                                                                                                                                       |
|                        | Page 9          | (d) If applicable, explain how loss to follow-up was addressed                                                                                                                                    |
|                        | Page 9-10       | (e) Describe any sensitivity analyses                                                                                                                                                             |
| <b>Results</b>         |                 |                                                                                                                                                                                                   |
| Participants           | 13 (page 10)    | (a) Report numbers of individuals at each stage of study—eg numbers potentially eligible, examined for eligibility, confirmed eligible, included in the study, completing follow-up, and analysed |
|                        | Page 10         | (b) Give reasons for non-participation at each stage                                                                                                                                              |
|                        | Figure 1        | (c) Consider use of a flow diagram                                                                                                                                                                |
| Descriptive data       | 14 (page 10-11) | (a) Give characteristics of study participants (eg demographic, clinical, social) and information on exposures and potential confounders                                                          |
|                        | Page 10         | (b) Indicate number of participants with missing data for each variable of interest                                                                                                               |
|                        | Pages 12        | (c) Summarise follow-up time (eg, average and total amount)                                                                                                                                       |

|                          |                  |                                                                                                                                                                                                              |
|--------------------------|------------------|--------------------------------------------------------------------------------------------------------------------------------------------------------------------------------------------------------------|
| Outcome data             | 15 (page 11)     | Report numbers of outcome events or summary measures over time                                                                                                                                               |
| Main results             | 16 (pages 11-12) | (a) Give unadjusted estimates and, if applicable, confounder-adjusted estimates and their precision (eg, 95% confidence interval). Make clear which confounders were adjusted for and why they were included |
|                          | Page 7-8, 23-27  | (b) Report category boundaries when continuous variables were categorized                                                                                                                                    |
|                          | n/a              | (c) If relevant, consider translating estimates of relative risk into absolute risk for a meaningful time period                                                                                             |
| Other analyses           | 17 (pages 12)    | Report other analyses done—eg analyses of subgroups and interactions, and sensitivity analyses                                                                                                               |
| <b>Discussion</b>        |                  |                                                                                                                                                                                                              |
| Key results              | 18 (page 12)     | Summarise key results with reference to study objectives                                                                                                                                                     |
| Limitations              | 19 (pages 14-15) | Discuss limitations of the study, taking into account sources of potential bias or imprecision. Discuss both direction and magnitude of any potential bias                                                   |
| Interpretation           | 20 (page 12-13)  | Give a cautious overall interpretation of results considering objectives, limitations, multiplicity of analyses, results from similar studies, and other relevant evidence                                   |
| Generalisability         | 21 (page 14)     | Discuss the generalisability (external validity) of the study results                                                                                                                                        |
| <b>Other information</b> |                  |                                                                                                                                                                                                              |
| Funding                  | 22 (page 20)     | Give the source of funding and the role of the funders for the present study and, if applicable, for the original study on which the present                                                                 |

|  |  |                  |
|--|--|------------------|
|  |  | article is based |
|--|--|------------------|

\*Give information separately for exposed and unexposed groups.

**Note:** An Explanation and Elaboration article discusses each checklist item and gives methodological background and published examples of transparent reporting. The STROBE checklist is best used in conjunction with this article (freely available on the Web sites of PLoS Medicine at <http://www.plosmedicine.org/>, Annals of Internal Medicine at <http://www.annals.org/>, and Epidemiology at <http://www.epidem.com/>). Information on the STROBE Initiative is available at <http://www.strobe-statement.org>.

For peer review only

# BMJ Open

## An observational study of the differential impact of time-varying depressive symptoms on all-cause and cause-specific mortality by health status in community dwelling adults: The REGARDS study

|                                 |                                                                                                                                                                                                                                                                                                                                                                                                                                                                                                                                                                                                                                               |
|---------------------------------|-----------------------------------------------------------------------------------------------------------------------------------------------------------------------------------------------------------------------------------------------------------------------------------------------------------------------------------------------------------------------------------------------------------------------------------------------------------------------------------------------------------------------------------------------------------------------------------------------------------------------------------------------|
| Journal:                        | <i>BMJ Open</i>                                                                                                                                                                                                                                                                                                                                                                                                                                                                                                                                                                                                                               |
| Manuscript ID                   | bmjopen-2017-017385.R3                                                                                                                                                                                                                                                                                                                                                                                                                                                                                                                                                                                                                        |
| Article Type:                   | Research                                                                                                                                                                                                                                                                                                                                                                                                                                                                                                                                                                                                                                      |
| Date Submitted by the Author:   | 14-Nov-2017                                                                                                                                                                                                                                                                                                                                                                                                                                                                                                                                                                                                                                   |
| Complete List of Authors:       | Moise, Nathalie; Columbia University Medical Center, Center for Behavioral Cardiovascular Health<br>Khodneva, Yulia; University of Alabama School of Medicine<br>Jannat-Khah, Deanna; NewYork-Presbyterian Hospital/Weill Cornell Medical Center<br>Richman, Joshua; University of Alabama School of Medicine<br>Davidson, Karina; Columbia University Medical Center, Medicine<br>Kronish, Ian M. ; Columbia University Medical Center, Center Behavioral Cardiovascular Health<br>Shaffer, Jonathan; University of Colorado Denver Department of Psychology<br>Safford, Monika; Cornell University Joan and Sanford I Weill Medical College |
| <b>Primary Subject Heading</b>: | Mental health                                                                                                                                                                                                                                                                                                                                                                                                                                                                                                                                                                                                                                 |
| Secondary Subject Heading:      | Mental health                                                                                                                                                                                                                                                                                                                                                                                                                                                                                                                                                                                                                                 |
| Keywords:                       | mortality, health status, Depression & mood disorders < PSYCHIATRY                                                                                                                                                                                                                                                                                                                                                                                                                                                                                                                                                                            |
|                                 |                                                                                                                                                                                                                                                                                                                                                                                                                                                                                                                                                                                                                                               |

SCHOLARONE™  
Manuscripts

1 **An observational study of the differential impact of time-varying depressive symptoms on**  
2  
3 **all-cause and cause-specific mortality by health status in community dwelling adults: The**  
4  
5 **REGARDS study**  
6

7 **Running Title:** depressive symptoms and mortality  
8

9  
10 **Authors:** Nathalie Moise, MD, MS<sup>1</sup> (assistant professor); Yulia Khodneva, MD, PhD<sup>2</sup> (medical  
11 resident); Deanna Pereira Jannat-Khah, DrPH, MSPH<sup>3</sup> (senior research data analyst); Joshua  
12 Richman, MD, PhD<sup>2</sup> (associate professor); Karina W. Davidson, PhD<sup>1</sup> (professor); Ian M.  
13 Kronish, MD, MPH<sup>1</sup> (assistant professor); Jonathan Shaffer, PhD<sup>4</sup> (assistant professor); Monika  
14 M. Safford, MD<sup>3</sup> (professor)  
15

16  
17 **Affiliations:** <sup>1</sup>Center for Behavioral Cardiovascular Health, Department of Medicine, Division of  
18 Cardiology, Columbia University Medical Center, New York, NY; <sup>2</sup>University of Alabama at  
19 Birmingham, Birmingham, AL; <sup>3</sup>Weill Cornell Medical College, New York, NY.  
20

21  
22 <sup>4</sup>Department of Psychology, University of Colorado Denver;  
23

24  
25 **Corresponding Author:**

26 Nathalie Moise, MD, MS  
27 Center for Behavioral and Cardiovascular Health, Department of Medicine  
28 Columbia University Medical Center  
29 622 W. 168<sup>th</sup> Street, PH9- Room 321  
30 New York, NY 10032  
31 Phone: 212-342-2889  
32 Fax: 212-342-3431  
33 Email: [nm2562@cumc.columbia.edu](mailto:nm2562@cumc.columbia.edu)  
34  
35

36  
37 **Journal Subject Codes:** mortality, depression, health status  
38

39 **Total Document Text Count:** 3063  
40

41 **Abstract:** 240/300  
42  
43  
44  
45  
46  
47  
48  
49  
50  
51  
52  
53  
54  
55  
56  
57  
58  
59  
60



## Abstract

**Objective:** To assess the association between time-varying depressive symptoms with all-cause and cause-specific mortality

**Design:** The Reasons for Geographic and Racial Differences in Stroke (REGARDS) is a national, population-based longitudinal study conducted from 2003-2007.

**Setting:** General continental U.S. communities

**Participants:** 29,491 black and white U.S. adults  $\geq 45$  years randomly sampled within race-sex-geographic strata

**Exposure:** Elevated depressive symptoms (CES-D-4  $\geq 4$ ) measured at baseline and on average 5 and 7 years later

**Main Outcome Measures:** Cox proportional hazard regression models assessed cancer, non-cardiovascular (CVD), CVD and all-cause mortality.

**Results:** The average age was 64.9 years; 55% were female; 41% black; 11.0% had elevated depressive symptoms; 54% had poor, fair or good health. Time-varying depressive symptoms were significantly associated with nonCVD (aHR=1.29, 95% CI 1.16-1.44) and all-cause (aHR=1.24, 95%CI 1.14-1.39), but not cancer (aHR=1.15, 95%CI 0.96-1.38) or CVD (aHR=1.13, 95%CI 0.98-1.32) death adjusting for demographics, chronic clinical diseases, behavioral risk factors, and physiologic factors. Depressive symptoms were related to all-cause (aHR=1.48, 95%CI 1.27-1.78), CVD (aHR=1.37, 95%CI 0.99-1.91), nonCVD (aHR=1.54, 95%CI 1.24-1.92) and cancer (aHR=1.36 95% 0.97-1.91) death in those who reported excellent or very good health. The analyses of the association between one measure of baseline depressive symptoms and mortality analyses yielded similar results.

1 **Conclusions:** Time-varying depressive symptoms confer an increased risk for all-cause  
2 mortality, CVD, non-CVD death and cancer death, particularly in those with excellent or very  
3 good health. These findings may have implications for timely treatment, regardless of health  
4 status.  
5  
6  
7  
8  
9

### 10 **Strengths and limitations of this study.**

- 14 • Depression is a relapsing/remitting disease and our study is one of the first to use multiple  
15 measurements of depression to demonstrate a time varying relationship between  
16 depression and mortality, including cancer mortality, in a large, diverse cohort.  
17  
18
  - 19 • To our knowledge, we are also the first to report a significant moderating effect of self-  
20 reported health on the relationship between depressive symptoms and cause-specific  
21 mortality, with depression predicting mortality particularly in those with excellent or very  
22 good reported health.  
23  
24
  - 25 • Our analyses were limited by the use of the short form of the CES-D scale  
26  
27
  - 28 • The REGARDS cohort is regionally specific, limiting generalizability.  
29  
30
- 31  
32  
33  
34  
35  
36  
37  
38  
39  
40  
41  
42  
43  
44  
45  
46  
47  
48  
49  
50  
51  
52  
53  
54  
55  
56  
57  
58  
59  
60

## Introduction

It is well known that elevated depressive symptoms predict mortality,<sup>1</sup> both in high-risk individuals with chronic illnesses like cardiovascular disease (CVD), and in general populations.<sup>2-4 5-8</sup> More recently, several studies have shown that depressive symptoms both preceding and following cancer diagnosis may confer an increased risk of cancer death as well.<sup>9,10</sup>

However, depressive symptoms relapse and remit, and prior studies on the relationship between depressive symptoms and mortality have been limited by one measurement of depressive symptoms.<sup>1</sup> Recently, Lasserre et al. (2016) found that current but not remitted depressive symptoms predict all-cause mortality, but again depression diagnoses and history were ascertained at one time point.<sup>11</sup> In addition, prior literature has often been marked by inadequate adjustment for important covariates, such as behavioral risk factors. To our knowledge, few if any prior studies have examined the time-varying association between depressive symptoms and excess causes of death, including all-cause and cause specific mortality. In addition, self-perceived health status may predict mortality<sup>12</sup> and complicate the relationship between depressive symptoms and poor outcomes.<sup>13</sup> It is unknown whether depressive symptoms confer an increased risk of excess mortality equally in those with self-reported excellent/very good (in whom depression may be less likely to be recognized) and good/fair/poor health.

The purpose of our study is to examine the association between time-varying depressive symptoms with cancer, CVD, nonCVD and all-cause mortality in the Reasons for Geographic and Racial Differences in Stroke (REGARDS) study, a broad, diverse population cohort with repeat measurements of depressive symptoms. We stratify by self-reported baseline health status

1 (very good or excellent vs. poor, fair or good) to further isolate the association between  
2  
3 depressive symptoms and excess mortality.  
4  
5  
6  
7

## 8 **Methods**

9  
10 The REGARDS study is a national cohort study of stroke incidence and cognitive decline in  
11 black and white community dwelling adults  $\geq 45$  years living in the United States stratified to  
12 reflect specific race-sex-geographic strata.<sup>14</sup> Inclusion and exclusion criteria have been  
13 previously described; of note, those with active cancer were excluded from the original study.<sup>14</sup>  
14  
15 Coronary heart disease (CHD) outcomes were ascertained from a REGARDS-MI ancillary study.  
16  
17 Participants were recruited by mail using commercially available lists of U.S. residents, followed  
18 by a computer-assisted telephone interview and subsequent home visit at which time individuals  
19 were consented and enrolled. Between January 2003 and October 2007, 30,239 black and white  
20 adults were enrolled. Of these, 489 (1.6%) were lost to follow-up and 208 (0.7%) were missing  
21 baseline depressive symptom measurements (**Figure 1**). The REGARDS study protocol was  
22 approved by institutional review boards at participating centers.  
23  
24  
25  
26  
27  
28  
29  
30  
31  
32  
33  
34  
35  
36  
37

### 38 *Study Procedures*

39  
40 Baseline data were collected through computer-assisted telephone interviews, an in-home  
41 examination, and self-administered questionnaires. Trained research staff conducted telephone  
42 interviews to collect demographic data, medical history and behavioral risk factors. Following  
43 the telephone interview, individuals had an in-home visit during which physical measurements, a  
44 resting electrocardiogram, medication inventory, phlebotomy and urine were collected. The  
45 median time between the initial phone interview and in-home examination was 28.0  
46  
47  
48  
49  
50  
51  
52  
53  
54 (interquartile range = 21.0) days.  
55  
56  
57  
58  
59  
60

### *Primary Outcomes*

The primary outcomes for these analyses were (1) cancer mortality (all body sites) (2) CVD death defined as death from CHD, stroke, heart failure, sudden cardiac death, vascular pathology, and other CVD causes (3) non-CVD death and (4) all-cause mortality. Living participants or their proxies were followed up every 6 months by telephone with retrieval of medical records for reported hospitalizations or physician visits. Deaths were detected by report of next-of-kin or through online services (e.g., Social Security Death Index) or the National Death Index.<sup>14</sup> Death certificates, medical records, and autopsy reports were obtained to adjudicate cause of death and CVD outcomes.

### *Depressive symptoms*

The primary predictor was baseline depressive symptoms. The 4-item Center for Epidemiologic Studies Depression (CES-D) scale was used to assess the presence of depressive symptoms. This scale asks participants to rate the number of days over the last week in which they had: 1) felt depressed; 2) felt lonely; 3) had crying spells; and 4) felt sad. Response options included <1 day, 1 to 2 days, 3 to 4 days, and 5-7 days (0, 1, 2 3 points, respectively). Cronbach's  $\alpha$  for the CES-D in the total sample was 0.80. Elevated depressive symptoms were defined as a summed score of  $\geq 4$ .<sup>15</sup> The reliability and validity of the CES-D 4 is similar to the original 20-item instrument.<sup>16</sup>

### *Covariates*

Demographic data included self-reported age, gender, race (black or white), education (less than high school, high school graduate, some college, and college graduate and above), annual income (less than \$20,000, \$20,000-\$34,999, \$35,000-\$74,999, \$75,000 and above), insurance

1 status (yes/no), and stroke region (including the ‘stroke belt’ and ‘stroke buckle’). Clinical risk  
2  
3 factors included (1) diabetes defined as fasting blood glucose  $\geq 126$  or random glucose  $> 200$   
4  
5 mL/dL or oral hypoglycemic or insulin use, (2) systolic and diastolic blood pressures based on  
6  
7 the average of two standardized blood pressure measurements (in mm Hg) (3) body mass index  
8  
9 (BMI) based on measured height and weight (4) albumin-to-creatinine ratio (ACR)  
10  
11 (logarithmically-transformed), (5) high-density lipoprotein (HDL)-cholesterol, (6) total  
12  
13 cholesterol, (7) history of CVD: coronary heart disease (self-reported history of myocardial  
14  
15 infarction or coronary revascularization procedure or evidence of myocardial infarction on the  
16  
17 study electrocardiogram), self-reported stroke, peripheral vascular disease, or aneurysm, (8)  
18  
19 cognitive impairment on the 6-item screener of global cognitive function<sup>17,18</sup> (9) chronic lung  
20  
21 disease defined as use of beta-2 adrenergic agonists, leukotriene inhibitors, inhaled  
22  
23 corticosteroids, combination inhalers, or other pulmonary medications such as ipratropium,  
24  
25 cromolyn, aminophylline and theophylline. We also assessed self-reported (yes/no) aspirin,  
26  
27 antidepressant (serotonin and norepinephrine reuptake inhibitors, selective serotonin reuptake  
28  
29 inhibitors, tricyclic antidepressants), statin, and antihypertensive use. Behavioral risk factors  
30  
31 included (1) self-reported pack-years of cigarette smoking; (2) physical activity (“How many  
32  
33 times per week do you engage in intense physical activity, enough to work up a sweat?” with  
34  
35 response options of “none”, “1-3 times per week” and “4 or more times per week”); (3) alcohol  
36  
37 use (“How many alcoholic beverages do you drink?”: none, moderate [1 drink per day for  
38  
39 women or 2 drinks per day for men], and heavy [greater than 1 drink per day for women and 2  
40  
41 drinks per day for men]);<sup>14</sup> (4) medication non-adherence assessed with the 4-item Morisky  
42  
43 Medication Adherence Scale ( $\geq 1$ ).<sup>19</sup> Potential physiologic risk factors included high-sensitivity  
44  
45 C-reactive protein, self-reported health status based on the physical component of the 12-item  
46  
47 Short-Form Health Survey (SF 12),<sup>20</sup> and perceived stress, measured by the 4-item version of the  
48  
49  
50  
51  
52  
53  
54  
55  
56  
57  
58  
59  
60

1 Perceived Stress Scale (score of  $\geq 5$  vs.  $<5$ ).<sup>21</sup> Other than depressive symptoms, no other  
2  
3 covariate was assessed more than once.  
4  
5

### 6 7 8 *Statistical Analyses* 9

10 Baseline characteristics of participants with and without elevated depressive symptoms at  
11  
12 baseline were compared using chi-square tests (for categorical variables), Student t tests (for  
13  
14 continuous variables), and Wilcoxon rank sum tests (for non-normally distributed continuous  
15  
16 measures).  
17  
18

19  
20  
21 Cox proportional hazard regression models were constructed to separately analyze the  
22  
23 association between depressive symptoms ( $\text{CES-D} \geq 4$ ) and cancer death (from all body sites, a  
24  
25 subset of nonCVD death), CVD death, nonCVD death and all-cause death. The end date of  
26  
27 follow-up for this analysis was December 31, 2012. Depressive symptoms were measured on the  
28  
29 CES-D scale: 1) at baseline (initial telephone call), 2) on average five years after baseline  
30  
31 measurement, and 3) on average two years after the second measurement. In the analyses, we  
32  
33 considered depressive symptoms ( $\text{CES-D} \geq 4$  vs.  $<4$ ) as a time-varying exposure, with updates of  
34  
35 exposure at 5-year and 7-year follow-up. Therefore, each participant contributed up to 3  
36  
37 measures of CES-D ( $\geq 4$  vs.  $<4$ ) with a broken-up follow-up time. Follow-up time for each  
38  
39 participant was calculated from the date of the in-home visit to the date of the earliest of: death,  
40  
41 last telephone follow-up, end of follow-up or next CES-D measure. We additionally graphically  
42  
43 plotted unadjusted survival functions for participants with elevated vs. nonelevated depressive  
44  
45 symptoms using the Simon-Makuch method,<sup>22</sup> a modification of the Kaplan-Meier method. In  
46  
47 this context, depression status is treated as a binary time-dependent covariate and study cohorts  
48  
49 are continually updated to contribute to either the  $\text{CES-D} \geq 4$  or  $\text{CES-D} < 4$  groups.  
50  
51  
52  
53  
54  
55  
56  
57  
58  
59  
60

1  
2  
3 Unadjusted hazard ratios and 95% confidence intervals (CI) of mortality endpoints were  
4  
5 estimated for those with vs. without elevated depressive symptoms. Adjusted modeling  
6  
7 proceeded in stages (adjusting for baseline covariates), starting with demographic (Model 1) and  
8  
9 traditional CVD risk factors (Model 2) assessed in prior trials. We then added behavioral (Model  
10  
11 3) and other potential explanatory (Model 4) factors. We also ran an additional model (Model 5),  
12  
13 which considered intervening first non-fatal stroke and/or myocardial infarction as a time-  
14  
15 dependent covariate in CVD death outcomes. All analyses were conducted overall as well as  
16  
17 stratified. We also conducted a formal test for interaction between depressive symptoms and self-  
18  
19 reported health (defined as excellent or very good vs. good, fair or poor health) in model 4. As  
20  
21 such, all analyses were conducted overall as well as stratified by baseline self-reported health. To  
22  
23 evaluate the possibility of non-proportional hazards, we graphically inspected the log-log  
24  
25 survival plots for depressive symptoms. We tested the Schoenfeld residuals for each model for a  
26  
27 non-zero slope and all p values were greater than 0.05, indicating compatibility with the  
28  
29 proportional hazards assumption.  
30  
31  
32  
33  
34  
35  
36  
37  
38  
39

#### 40 *Sensitivity Analyses*

41  
42 Sensitivity analyses constructed in parallel to the main analyses examined association of baseline  
43  
44 CES-D measure with mortality endpoints in the sequentially-adjusted Cox proportional hazard  
45  
46 regression models. The end date of follow-up for this analysis was December 31, 2012. Follow-  
47  
48 up time for each participant was calculated from the date of the in-home visit to the date of the  
49  
50 earliest of: death, last telephone follow-up, or end of follow-up.  
51  
52  
53  
54  
55  
56  
57  
58  
59  
60



1 Missing data in covariates were imputed using chained equations and derived by bootstrapping  
2  
3 across the 5 imputed datasets. Multiple imputation was used for all analyses. Of the 29,491  
4  
5 participants, 2768 (9%) were missing income data, 59 (0.2%) health status, 9 (<0.1%) education,  
6  
7 26 (0.1%) health insurance, 1087 (4%) diabetes, 16 (0.1%) aspirin use, 70 (0.2%) statin use, 70  
8  
9 (0.2%) antidepressant use, 333 (1%) anti-hypertension meds use, 439 (2%) physical activity,  
10  
11 2705 (9%) medication adherence, 213 (0.7%) BMI, 1254 (4%) cholesterol, 1401 (5%) HDL, 912  
12  
13 (3.1%) pack years, 84 (0.3%) SBP, 1394 (5%) renal function, 381 (1%) QTc, 5681 (19.3%)  
14  
15 cognitive status, 4 (<0.1%) stress, 1425 (4%) SF-12 and 1881 (6%) CRP. Analyses were  
16  
17 conducted using SAS software version 9.4 (SAS Institute, Cary, NC) and STATA version 12  
18  
19 (STATA incorporated, College Station, TX).  
20  
21  
22  
23  
24  
25  
26

## 27 **Results**

### 28 *Participant Characteristics*

29  
30 Overall, 1.6% were lost to follow-up and 0.7% were missing baseline depressive symptoms,  
31  
32 leaving 29,491 eligible participants (**Figure 1**) of whom 3,254 (11.0%) had elevated depressive  
33  
34 symptoms at baseline (CES-D $\geq$ 4). The average age was 64.9 (9.4) years; 55.1% were female and  
35  
36 41.1% were black, 22.0% had diabetes, 9.2% chronic lung disease, and 23.1% CVD. Nearly 33%  
37  
38 of individuals were physically inactive, 29.2% non-adherent to their medication regimen and  
39  
40 14.5% current smokers. A total of 53.5% of participants self-reported their general health to be  
41  
42 poor, fair, or good compared to 46.5% who reported their health to be excellent or very good, of  
43  
44 whom 16.0% and 5.3% had elevated depressive symptoms, respectively (eTable 1). Regardless  
45  
46 of health status, participants with elevated (vs. non-elevated) depressive symptoms were more  
47  
48 likely to be female, African-American, low income, have more chronic diseases, low physical  
49  
50 health, and more behavioral risk factors (**Table 1A-B**).  
51  
52  
53  
54  
55  
56  
57  
58  
59  
60

**Table 1A. Overall baseline characteristics of REGARDS participants according to baseline depressive symptoms (CES-D)**

| Characteristics                                          | Overall<br>(n=29,491) | CES-D < 4<br>(n=26,817) | CES-D ≥4<br>(n=3,254) | <i>p</i> |
|----------------------------------------------------------|-----------------------|-------------------------|-----------------------|----------|
| <b><i>Socio-demographics</i></b>                         |                       |                         |                       |          |
| Age, <i>M</i> (SD)                                       | 64.9 (9.4)            | 65.1 (9.4)              | 63.2 (9.8)            | <.001    |
| Female, n (%)                                            | 16245 (55.1)          | 13988 (53.3)            | 2257 (69.4)           | <.001    |
| African American, n (%)                                  | 12129 (41.1)          | 10427 (39.7)            | 1702 (52.3)           | <.001    |
| Less than high school education, n (%)                   | 3696 (12.5)           | 2916 (11.1)             | 780 (24.0)            | <.001    |
| Annual household income, n (%)                           |                       |                         |                       |          |
| Less than \$20,000                                       | 5322 (18.0)           | 4148 (15.8)             | 1174 (36.1)           | <.001    |
| No health insurance, n (%)                               | 1926 (6.5)            | 1532 (5.8)              | 394 (12.1)            | <.001    |
| Region, n (%)                                            |                       |                         |                       | <.001    |
| Stroke belt <sup>a</sup>                                 | 10193 (34.6)          | 8973 (34.2)             | 1220 (37.5)           |          |
| Stroke buckle <sup>b</sup>                               | 6188 (21.0)           | 5437 (20.7)             | 751 (23.1)            |          |
| Non-stroke belt or buckle                                | 13110 (44.5)          | 11827 (45.1)            | 1283 (39.4)           |          |
| <b><i>General health and medical conditions</i></b>      |                       |                         |                       |          |
| Self-reported general health, n (%)                      |                       |                         |                       | <.001    |
| Poor, fair, good                                         | 15742 (53.5)          | 13219 (50.5)            | 2523 (77.7)           |          |
| Excellent, very good                                     | 13690 (46.5)          | 12965 (49.5)            | 725 (22.3)            |          |
| Cardiovascular disease, n (%) <sup>c</sup>               | 6825 (23.1)           | 5838 (22.3)             | 987 (30.3)            | <.001    |
| Diabetes, n (%) <sup>d</sup>                             | 6252 (22.0)           | 5305 (21.0)             | 947 (30.2)            | <.001    |
| COPD, n (%)                                              | 2710 (9.2)            | 2307 (8.8)              | 403 (12.4)            | <.001    |
| Physical component score on SF-12 scale, <i>M</i> (SD)   | 46.4 (10.6)           | 47.1 (10.2)             | 40.7 (12.2)           | <.001    |
| <b><i>Physiological risk factors</i></b>                 |                       |                         |                       |          |
| Body Mass Index, kg/m <sup>2</sup> , <i>M</i> (SD)       | 29.3 (6.2)            | 29.2 (6.1)              | 30.6 (7.1)            | <.001    |
| Systolic Blood Pressure, mmHg, <i>M</i> (SD)             | 127.6 (16.7)          | 127.5 (16.5)            | 128.7 (18.1)          | <.001    |
| Total Cholesterol, mg/dL, <i>M</i> (SD)                  | 192.1 (40.1)          | 191.7 (39.8)            | 194.6 (43.0)          | <0.001   |
| High-Density Lipoprotein, mg/dL, <i>M</i> (SD)           | 51.8 (16.2)           | 51.7 (16.2)             | 52.5 (16.3)           | 0.02     |
| QT Interval, corrected for heart rate, ms, <i>M</i> (SD) | 407.5 (23.6)          | 407.2 (23.5)            | 410.0 (24.1)          | <.001    |
| High-Sensitivity C-Reactive Protein, mg/L, median, IQR   | 2.2[1.0-5.0]          | 2.1[0.9-4.8]            | 3.0[1.2-6.9]          | <.001    |
| Albumin to Creatinine Ratio, mg/g, median, IQR           | 7.4[4.7-6.2]          | 7.3[4.6-15.8]           | 8.2[5.1-19.8]         | <.001    |
| <b><i>Medications</i></b>                                |                       |                         |                       |          |
| Antihypertensive medication use, n (%)                   | 15197 (52.1)          | 13290 (51.2)            | 1907 (59.4)           | <.001    |
| Statin use, n (%)                                        | 9295 (31.6)           | 8248 (31.5)             | 1047 (32.3)           | 0.38     |

|    |                                             |              |              |              |        |
|----|---------------------------------------------|--------------|--------------|--------------|--------|
| 1  | Aspirin use, n (%)                          | 12790 (43.4) | 11376 (43.4) | 1414 (43.5)  | 0.91   |
| 2  |                                             |              |              |              |        |
| 3  | Antidepressant use, n (%)                   | 4086 (13.9)  | 3164 (12.1)  | 922 (28.4)   | <.001  |
| 4  | <b>Behavioral risk factors</b>              |              |              |              |        |
| 5  | Self-reported smoking, pack years, <i>M</i> |              |              |              |        |
| 6  | (SD)                                        | 13.5 ( 23.1) | 13.3 ( 22.8) | 15.5 ( 24.9) | <.001  |
| 7  |                                             |              |              |              |        |
| 8  | Current Smoking, n(%)                       | 4263(14.5)   | 3463(13.3)   | 800(24.7)    | <.001  |
| 9  |                                             |              |              |              |        |
| 10 | Alcohol use, n (%)                          |              |              |              | <.001  |
| 11 | Heavy                                       | 1172 (4.1)   | 1043 (4.0)   | 129 (4.1)    |        |
| 12 | Moderate                                    | 9626 (33.3)  | 8786 (34.1)  | 840 (26.6)   |        |
| 13 | None                                        | 18116 (62.7) | 15925 (61.8) | 2191 (69.3)  |        |
| 14 | Physical inactivity, n (%)                  | 10004 (34.4) | 8500 (32.9)  | 1504 (46.9)  | <0.001 |
| 15 |                                             |              |              |              |        |
| 16 | Medication non-adherence, n (%)             | 7959 (29.7)  | 6820 (28.7)  | 1139 (37.8)  | <.001  |
| 17 |                                             |              |              |              |        |
| 18 | Impaired cognitive status                   | 1888 (7.9)   |              |              |        |
| 19 | (Cognitive score $\leq 4$ )                 |              | 1542 (7.3)   | 346 (12.6)   | <.001  |
| 20 | Elevated perceived stress (PSS $\geq 5$ )   | 8591 (29.1)  | 6283 (23.9)  | 2308 (70.9)  | <.001  |

*p* Values from chi square, Student *t* tests. CES-D = Centers for Epidemiology Studies – Depression scale.

CVD = cardiovascular disease. IQR = interquartile range. *M* = mean. SD = standard deviation;

PSS=Perceived stress scale; COPD=Chronic Obstructive Pulmonary Disease

n= total number assuming no missing data

<sup>a</sup>Stroke Belt defined as the states of Alabama, Arkansas, Louisiana, Mississippi, Tennessee and the noncoastal regions within the states of North Carolina, South Carolina and Georgia.

<sup>b</sup>Stroke buckle defined as coastal regions within the states of North Carolina, South Carolina and Georgia.

<sup>c</sup>CVD defined as baseline coronary heart disease, stroke, periphery artery disease or aortic aneurism.

<sup>d</sup>Diabetes defined as fasting blood glucose  $\geq 126$  or random glucose  $>200$  mL/dL or oral hypoglycemic or insulin use.

**Table 1B. Baseline characteristics of REGARDS participants according to baseline depressive symptoms (CES-D) and self-reported health**

| Characteristics                                          | <i>Self-reported general health as "excellent or very good"</i> |                     |          | <i>Self-reported general health as "poor, fair or good"</i> |                      |          |
|----------------------------------------------------------|-----------------------------------------------------------------|---------------------|----------|-------------------------------------------------------------|----------------------|----------|
|                                                          | CES-D < 4<br>(n=12965)                                          | CES-D ≥4<br>(n=725) | <i>p</i> | CES-D < 4<br>(n=13219)                                      | CES-D ≥4<br>(n=2523) | <i>p</i> |
| <b><i>Socio-demographics</i></b>                         |                                                                 |                     |          |                                                             |                      |          |
| Age, <i>M</i> (SD)                                       | 64.8 (9.4)                                                      | 64.5 (10.2)         | 0.47     | 65.5 (9.3)                                                  | 62.8 (9.6)           | <.001    |
| Female, n (%)                                            | 6600 (50.9)                                                     | 501 (69.1)          | <.001    | 7357 (55.7)                                                 | 1751 (69.4)          | <.001    |
| African American, n (%)                                  | 3726 (28.7)                                                     | 295 (40.7)          | <.001    | 6677 (50.5)                                                 | 1404 (55.6)          | <.001    |
| Less than high school education, n (%)                   | 845 (6.5)                                                       | 119 (16.4)          | <.001    | 2059 (15.6)                                                 | 658 (26.1)           | <.001    |
| Annual household income, n (%)                           |                                                                 |                     |          |                                                             |                      |          |
| Less than \$20,000                                       | 1304 (10.1)                                                     | 190 (26.2)          | <.001    | 2832 (21.4)                                                 | 983 (39.0)           | <.001    |
| No health insurance, n (%)                               | 644 (5.0)                                                       | 70 (9.7)            | <.001    | 884 (6.7)                                                   | 324 (12.9)           | <.001    |
| Region, n (%)                                            |                                                                 |                     | 0.37     |                                                             |                      | <.001    |
| Stroke belt <sup>a</sup>                                 | 4282 (33.0)                                                     | 256 (35.3)          |          | 4668 (35.3)                                                 | 963 (38.2)           |          |
| Stroke buckle <sup>b</sup>                               | 2619 (20.2)                                                     | 148 (20.4)          |          | 2807 (21.2)                                                 | 601 (23.8)           |          |
| Non-stroke belt or buckle                                | 6064 (46.8)                                                     | 321 (44.3)          |          | 5744 (43.5)                                                 | 959 (38.0)           |          |
| <b><i>General health and medical conditions</i></b>      |                                                                 |                     |          |                                                             |                      |          |
| Self-reported general health, n (%)                      |                                                                 |                     |          |                                                             |                      |          |
| Poor, fair, good                                         | --                                                              | --                  |          | ---                                                         | --                   |          |
| Excellent, very good                                     | --                                                              | --                  |          | ---                                                         | ---                  |          |
| Cardiovascular disease, n (%) <sup>c</sup>               | 1948 (15.0)                                                     | 144 (19.9)          | 0.004    | 3874 (29.3)                                                 | 840 (33.3)           | <.001    |
| Diabetes, n (%) <sup>d</sup>                             | 1443 (11.6)                                                     | 93 (13.3)           | 0.16     | 3840 (30.2)                                                 | 853 (35.1)           | <.001    |
| COPD, n (%)                                              | 796 (6.2)                                                       | 55 (7.6)            | 0.11     | 1507 (11.4)                                                 | 347 (13.8)           | 0.007    |
| Physical component score on SF-12 scale, <i>M</i> (SD)   | 52.0 (6.5)                                                      | 51.3 (9.1)          | 0.008    | 42.0 (10.7)                                                 | 37.7 (11.3)          | <.001    |
| <b><i>Physiological risk factors</i></b>                 |                                                                 |                     |          |                                                             |                      |          |
| Body Mass Index, kg/m <sup>2</sup> , <i>M</i> (SD)       | 27.8 (5.1)                                                      | 28.4 (5.7)          | 0.006    | 30.5 (6.6)                                                  | 31.2 (7.3)           | <.001    |
| Systolic Blood Pressure, mmHg, <i>M</i> (SD)             | 125.3 (15.7)                                                    | 126.0 (17.2)        | 0.27     | 129.6 (16.9)                                                | 129.5 (18.3)         | 0.91     |
| Total Cholesterol, mg/dL, <i>M</i> (SD)                  | 193.8 (38.2)                                                    | 195.5 (38.6)        | 0.26     | 189.7 (41.2)                                                | 194.4 (44.2)         | <.001    |
| High-Density Lipoprotein, mg/dL, <i>M</i> (SD)           | 53.1 (16.4)                                                     | 55.8 (16.6)         | <.001    | 50.4 (15.8)                                                 | 51.5 (16.1)          | 0.002    |
| QT Interval, corrected for heart rate, ms, <i>M</i> (SD) | 405.6 (22.6)                                                    | 407.2 (23.5)        | 0.06     | 408.7 (24.3)                                                | 410.8 (24.2)         | <0.001   |
| High-Sensitivity C-Reactive Protein, mg/L, median, IQR   | 1.7[0.8-3.8]                                                    | 1.9[0.9-4.9]        | 0.004    | 2.7[1.2-6.1]                                                | 3.4[1.3-7.7]         | <.001    |
| Albumin to Creatinine Ratio, mg/g, median, IQR           | 6.6[4.3-12.3]                                                   | 6.9[4.7-14.0]       | 0.005    | 8.4[5.0-20.7]                                               | 8.7[5.1-22.2]        | 0.18     |
|                                                          | 4916 (38.3)                                                     | 297 (41.7)          | 0.06     | 8344 (63.9)                                                 | 1606 (64.5)          | 0.57     |

**Medications**

|                                                      |              |              |       |              |              |       |
|------------------------------------------------------|--------------|--------------|-------|--------------|--------------|-------|
| Antihypertensive medication use, n (%)               |              |              |       |              |              |       |
| Statin use, n (%)                                    | 3407 (26.4)  | 176 (24.4)   | 0.24  | 4822 (36.5)  | 870 (34.6)   | 0.06  |
| Aspirin use, n (%)                                   | 5254 (40.5)  | 273 (37.7)   | 0.13  | 6100 (46.2)  | 1140 (45.2)  | 0.36  |
|                                                      |              |              |       |              |              | <.001 |
| Antidepressant use, n (%)                            | 1224 (9.5)   | 144 (19.9)   | <.001 | 1933 (14.6)  | 774 (30.8)   |       |
| <b>Behavioral risk factors</b>                       |              |              |       |              |              |       |
| Self-reported smoking, pack years, <i>M</i> (SD)     | 11.2 ( 20.5) | 12.1 ( 21.6) | 0.24  | 15.3 ( 24.7) | 16.5 ( 25.6) | 0.03  |
| Current Smoking, n(%)                                | 1344 (10.4)  | 114 (15.8)   | <.001 | 2110 (16.0)  | 684 (27.2)   | <.001 |
| Alcohol use, n (%)                                   |              |              | 0.01  |              |              | <.001 |
| Heavy                                                | 634 (5.0)    | 38 (5.4)     |       | 409 (3.2)    | 91 (3.7)     |       |
| Moderate                                             | 5034 (39.4)  | 238 (33.8)   |       | 3746 (29.0)  | 600 (24.5)   |       |
| None                                                 | 7103 (55.6)  | 429 (60.9)   |       | 8779 (67.9)  | 1758 (71.8)  |       |
| Physical inactivity, n (%)                           | 3107 (24.3)  | 259 (36.0)   | <.001 | 5372 (41.3)  | 1242 (50.0)  | <.001 |
| Medication non-adherence, n (%)                      | 2997 (26.2)  | 211 (33.1)   | <.001 | 3809 (31.0)  | 926 (39.1)   | <.001 |
| Impaired cognitive status (Cognitive score $\leq$ 4) | 587 (5.6)    | 61 (10.1)    | <.001 | 947 (8.9)    | 285 (13.3)   | <.001 |
| Elevated perceived stress (PSS $\geq$ 5)             | 2219 (17.1)  | 404 (55.7)   | <.001 | 4048 (30.6)  | 1900 (75.3)  | <.001 |

*p* Values from chi square, Student *t* tests. CES-D = Centers for Epidemiology Studies – Depression scale.

CVD = cardiovascular disease. IQR = interquartile range. *M* = mean. SD = standard deviation;

PSS=Perceived stress scale; COPD=Chronic Obstructive Pulmonary Disease

n= total number assuming no missing data

<sup>a</sup>Stroke Belt defined as the states of Alabama, Arkansas, Louisiana, Mississippi, Tennessee and the noncoastal regions within the states of North Carolina, South Carolina and Georgia.

<sup>b</sup>Stroke buckle defined as coastal regions within the states of North Carolina, South Carolina and Georgia.

<sup>c</sup> CVD defined as baseline coronary heart disease, stroke, periphery artery disease or aortic aneurism.

<sup>d</sup>Diabetes defined as fasting blood glucose  $\geq$ 126 or random glucose  $>$ 200 mL/dL or oral hypoglycemic or insulin use.

**Mortality**

A total of 4,581 (15.5%) participants died during the follow-up period ending in 2012. Of these, 1,551 (33.9%) were attributed to CVD and 3,030 (66.1%) to nonCVD disease death. Of nonCVD deaths, 1,226 (44.3%) were due to cancer death (eTable 2). Overall, there were only 3 cases of mortality due to suicide.

For the time-varying analyses, depressive symptoms were measured at baseline and on average 4.8 years (SD = 1.5) years following the baseline measurement, the third measurement occurring on average 2.1 (SD = 0.4) years after the second measurement (eFigure 1). The mean follow-up time

1 of the second and third measurement of CES-D measures did not differ by self-reported health  
2  
3 (eFigure 2). Of the participants with elevated depressive symptoms at baseline, 39.9% and 36.8%  
4  
5 had elevated depressive symptoms at the second and third measures, respectively (eTable 3). Time-  
6  
7 varying depressive symptoms significantly predicted nonCVD disease death (aHR 1.29, 95% CI  
8  
9 1.16-1.44) and all-cause mortality (aHR 1.24, 95% CI 1.14-1.36), while approaching significance  
10  
11 for cancer death (aHR 1.15, 95% CI 0.96-1.38) and CVD death (aHR 1.13, 95% CI 0.98-1.32),  
12  
13 even after adjusting for demographic, clinical, behavioral physiologic factors and time-varying non-  
14  
15 fatal CVD events (**Table 2**, eFigure 3). The results appeared to be particularly robust amongst those  
16  
17 with excellent or very good self-reported general health: all-cause (aHR=1.48, 95%CI 1.27-1.78),  
18  
19 CVD (aHR=1.37, 95%CI 0.99-1.91), nonCVD (aHR=1.54, 95%CI 1.24-1.92) and cancer  
20  
21 (aHR=1.36 95% 0.97-1.91) death. In Model 4, the p-values for the depressive symptoms x health  
22  
23 status interaction term were 0.005 (all-cause mortality), 0.06 (CVD death), 0.03 (nonCVD death),  
24  
25 and 0.20 (cancer death) (**Table 2**).

**Table 2. Association of elevated depressive symptoms with mortality outcomes.** Each participant contributes to up to 3 time-variant CES-D measures. End of follow-up December 31, 2012.

|                                                                                                                                                                                                                                                                                                                                                                                                                                                                                                                                                                                                                                                                                                                                                                                  | Overall (N=29,491)                              | Self-reported general health as "excellent or very good" n=13,711 | Self-reported general health as "poor, fair or good" n=15,780 |
|----------------------------------------------------------------------------------------------------------------------------------------------------------------------------------------------------------------------------------------------------------------------------------------------------------------------------------------------------------------------------------------------------------------------------------------------------------------------------------------------------------------------------------------------------------------------------------------------------------------------------------------------------------------------------------------------------------------------------------------------------------------------------------|-------------------------------------------------|-------------------------------------------------------------------|---------------------------------------------------------------|
| <b>HR (95%CI) for categorical CES-D (Score =&gt;4 v. &lt; 4)</b>                                                                                                                                                                                                                                                                                                                                                                                                                                                                                                                                                                                                                                                                                                                 |                                                 |                                                                   |                                                               |
| <b>All-cause mortality</b>                                                                                                                                                                                                                                                                                                                                                                                                                                                                                                                                                                                                                                                                                                                                                       |                                                 |                                                                   |                                                               |
| Events, n                                                                                                                                                                                                                                                                                                                                                                                                                                                                                                                                                                                                                                                                                                                                                                        | 4581                                            | 1392                                                              | 3189                                                          |
| Crude                                                                                                                                                                                                                                                                                                                                                                                                                                                                                                                                                                                                                                                                                                                                                                            | <b>1.66(1.54-1.80)</b>                          | <b>1.97(1.66-2.33)</b>                                            | <b>1.30(1.19-1.42)</b>                                        |
| Model 1 <sup>a</sup>                                                                                                                                                                                                                                                                                                                                                                                                                                                                                                                                                                                                                                                                                                                                                             | <b>1.63(1.50-1.76)</b>                          | <b>1.74(1.46-2.07)</b>                                            | <b>1.42(1.29-1.55)</b>                                        |
| Model 2 <sup>b</sup>                                                                                                                                                                                                                                                                                                                                                                                                                                                                                                                                                                                                                                                                                                                                                             | <b>1.42(1.31-1.54)</b>                          | <b>1.60(1.34-1.90)</b>                                            | <b>1.30(1.19-1.43)</b>                                        |
| Model 3 <sup>c</sup>                                                                                                                                                                                                                                                                                                                                                                                                                                                                                                                                                                                                                                                                                                                                                             | <b>1.38(1.27-1.49)</b>                          | <b>1.57(1.32-1.87)</b>                                            | <b>1.27(1.16-1.39)</b>                                        |
| Model 4 <sup>d</sup>                                                                                                                                                                                                                                                                                                                                                                                                                                                                                                                                                                                                                                                                                                                                                             | <b>1.24(1.13-1.35)</b>                          | <b>1.53(1.27-1.83)</b>                                            | <b>1.16(1.05-1.28)</b>                                        |
| Model 5 <sup>e</sup>                                                                                                                                                                                                                                                                                                                                                                                                                                                                                                                                                                                                                                                                                                                                                             | <b>1.24(1.14-1.36)</b>                          | <b>1.48(1.27-1.78)</b>                                            | <b>1.17(1.06-1.30)</b>                                        |
| Model 4 + CES-D x self-reported health                                                                                                                                                                                                                                                                                                                                                                                                                                                                                                                                                                                                                                                                                                                                           | p-value for the interaction term - <b>0.005</b> |                                                                   |                                                               |
| <b>CVD Death</b>                                                                                                                                                                                                                                                                                                                                                                                                                                                                                                                                                                                                                                                                                                                                                                 |                                                 |                                                                   |                                                               |
| Events, n                                                                                                                                                                                                                                                                                                                                                                                                                                                                                                                                                                                                                                                                                                                                                                        | 1551                                            | 437                                                               | 1114                                                          |
| Crude                                                                                                                                                                                                                                                                                                                                                                                                                                                                                                                                                                                                                                                                                                                                                                            | <b>1.61(1.41-1.85)</b>                          | <b>2.01(1.49-2.72)</b>                                            | <b>1.23(1.05-1.43)</b>                                        |
| Model 1 <sup>a</sup>                                                                                                                                                                                                                                                                                                                                                                                                                                                                                                                                                                                                                                                                                                                                                             | <b>1.58(1.37-1.81)</b>                          | <b>1.76(1.29-2.40)</b>                                            | <b>1.35(1.15-1.58)</b>                                        |
| Model 2 <sup>b</sup>                                                                                                                                                                                                                                                                                                                                                                                                                                                                                                                                                                                                                                                                                                                                                             | <b>1.31(1.13-1.51)</b>                          | <b>1.52(1.12-2.08)</b>                                            | <b>1.20(1.03-1.41)</b>                                        |
| Model 3 <sup>c</sup>                                                                                                                                                                                                                                                                                                                                                                                                                                                                                                                                                                                                                                                                                                                                                             | <b>1.27(1.10-1.46)</b>                          | <b>1.53(1.12-2.09)</b>                                            | 1.17(1.00-1.37)                                               |
| Model 4 <sup>d</sup>                                                                                                                                                                                                                                                                                                                                                                                                                                                                                                                                                                                                                                                                                                                                                             | 1.15(0.98-1.33)                                 | <b>1.47(1.07-2.04)</b>                                            | 1.06(0.90-1.26)                                               |
| Model 5 <sup>e</sup>                                                                                                                                                                                                                                                                                                                                                                                                                                                                                                                                                                                                                                                                                                                                                             | 1.13(0.98-1.32)                                 | 1.37(0.99-1.91) p=0.06                                            | 1.07(0.90-1.27)                                               |
| Model 4 + CES-D x self-reported health                                                                                                                                                                                                                                                                                                                                                                                                                                                                                                                                                                                                                                                                                                                                           | p-value for the interaction term - <b>0.06</b>  |                                                                   |                                                               |
| <b>NonCVD Death</b>                                                                                                                                                                                                                                                                                                                                                                                                                                                                                                                                                                                                                                                                                                                                                              |                                                 |                                                                   |                                                               |
| Events, n                                                                                                                                                                                                                                                                                                                                                                                                                                                                                                                                                                                                                                                                                                                                                                        | 3030                                            | 955                                                               | 2075                                                          |
| Crude                                                                                                                                                                                                                                                                                                                                                                                                                                                                                                                                                                                                                                                                                                                                                                            | <b>1.69(1.53-1.86)</b>                          | <b>1.95(1.58-2.39)</b>                                            | <b>1.34(1.20-1.50)</b>                                        |
| Model 1 <sup>a</sup>                                                                                                                                                                                                                                                                                                                                                                                                                                                                                                                                                                                                                                                                                                                                                             | <b>1.65(1.50-1.83)</b>                          | <b>1.73(1.40-2.14)</b>                                            | <b>1.45(1.30-1.63)</b>                                        |
| Model 2 <sup>b</sup>                                                                                                                                                                                                                                                                                                                                                                                                                                                                                                                                                                                                                                                                                                                                                             | <b>1.48(1.34-1.64)</b>                          | <b>1.63(1.32-2.02)</b>                                            | <b>1.35(1.23-1.51)</b>                                        |
| Model 3 <sup>c</sup>                                                                                                                                                                                                                                                                                                                                                                                                                                                                                                                                                                                                                                                                                                                                                             | <b>1.44(1.30-1.59)</b>                          | <b>1.59(1.29-1.97)</b>                                            | <b>1.33(1.18-1.49)</b>                                        |
| Model 4 <sup>d</sup>                                                                                                                                                                                                                                                                                                                                                                                                                                                                                                                                                                                                                                                                                                                                                             | <b>1.30(1.17-1.48)</b>                          | <b>1.58(1.27-2.24)</b>                                            | <b>1.22(1.08-1.38)</b>                                        |
| Model 5 <sup>e</sup>                                                                                                                                                                                                                                                                                                                                                                                                                                                                                                                                                                                                                                                                                                                                                             | <b>1.29(1.16-1.44)</b>                          | <b>1.54(1.24-1.92)</b>                                            | <b>1.22(1.08-1.38)</b>                                        |
| Model 4 + CES-D x self-reported health                                                                                                                                                                                                                                                                                                                                                                                                                                                                                                                                                                                                                                                                                                                                           | p-value for the interaction term - <b>0.03</b>  |                                                                   |                                                               |
| <b>Cancer Death (a subset of nonCVD death)</b>                                                                                                                                                                                                                                                                                                                                                                                                                                                                                                                                                                                                                                                                                                                                   |                                                 |                                                                   |                                                               |
| Events, n                                                                                                                                                                                                                                                                                                                                                                                                                                                                                                                                                                                                                                                                                                                                                                        | 1226                                            | 475                                                               | 751                                                           |
| Crude                                                                                                                                                                                                                                                                                                                                                                                                                                                                                                                                                                                                                                                                                                                                                                            | <b>1.27(1.09-1.53)</b>                          | <b>1.53(1.11-2.12)</b>                                            | 1.06(0.87-1.29)                                               |
| Model 1 <sup>a</sup>                                                                                                                                                                                                                                                                                                                                                                                                                                                                                                                                                                                                                                                                                                                                                             | <b>1.29(1.09-1.53)</b>                          | <b>1.45(1.04-2.01)</b>                                            | 1.16(0.95-1.42)                                               |
| Model 2 <sup>b</sup>                                                                                                                                                                                                                                                                                                                                                                                                                                                                                                                                                                                                                                                                                                                                                             | <b>1.25(1.05-1.48)</b>                          | <b>1.40(1.01-1.95)</b>                                            | 1.14(0.93-1.40)                                               |
| Model 3 <sup>c</sup>                                                                                                                                                                                                                                                                                                                                                                                                                                                                                                                                                                                                                                                                                                                                                             | <b>1.20(1.01-1.43)</b>                          | 1.35(0.97-1.88)                                                   | 1.11(0.91-1.36)                                               |
| Model 4 <sup>d</sup>                                                                                                                                                                                                                                                                                                                                                                                                                                                                                                                                                                                                                                                                                                                                                             | 1.16(0.96-1.39)                                 | 1.37(0.97-1.92)                                                   | 1.08(0.87-1.33)                                               |
| Model 5 <sup>e</sup>                                                                                                                                                                                                                                                                                                                                                                                                                                                                                                                                                                                                                                                                                                                                                             | 1.15(0.96-1.38)                                 | 1.36(0.97-1.91)                                                   | 1.08(0.90-1.34)                                               |
| Model 4 + CES-D x self-reported health                                                                                                                                                                                                                                                                                                                                                                                                                                                                                                                                                                                                                                                                                                                                           | p-value for the interaction term - 0.20         |                                                                   |                                                               |
| <sup>a</sup> Model 1 adjusts for <i>socio-demographics</i> (age, gender, region, income, health insurance, education)<br><sup>b</sup> Model 2 adds to model 1 <i>medical conditions, physiological factors and medication use</i> (systolic blood pressure, total cholesterol, high density lipoprotein-cholesterol, use of aspirin, statins, antihypertensives, antidepressants, body mass index, logarithmically transformed Albumin to Creatinine Ratio; diabetes, cardiovascular disease, medication use as a proxy for chronic obstructive pulmonary disease, and cognitive impairment)<br><sup>c</sup> Model 3 adds to model 2 <i>behavioral risk factors</i> (pack-years of cigarette smoking, self-reported alcohol use, physical inactivity, medication non-adherence). |                                                 |                                                                   |                                                               |



---

<sup>d</sup>Model 4 adds to model 3 *other factors* (physical health component score of SF-12, log-transformed high sensitivity C-reactive protein and perceived stress)

<sup>e</sup>Model 5 adds non-fatal CVD event – first nonfatal myocardial infarction or stroke since baseline.

HR = hazard ratio; CVD cardiovascular disease; CES-D = Centers for Epidemiology Studies-Depression

**Bold p-value < 0.05**; Missing data in covariates imputed using chained equations.

---

### *Sensitivity Analyses:*

The mean follow-up time was 6.5 (SD = 2.3) years, with a median [interquartile range] of 6.9 [5.4-8.3] years. Baseline depressive symptoms were significantly associated with all-cause mortality (aHR 1.18, 95%CI 1.07-1.29) and nonCVD death (aHR 1.21, 95%CI 1.08-1.36) and approached significance for CVD death (aHR 1.10, 95%CI 0.94-1.29) and cancer death (aHR 1.12, 95%CI 0.93-1.36), even in the exploratory models (Model 3). The results appeared to be particularly robust amongst those with excellent or very good health: cancer death (aHR 1.49, 95%CI 1.03-2.13), CVD death (aHR 1.63, 95%CI 1.16-2.30), nonCVD death (aHR 1.48, 95%CI 1.15-1.89) and all-cause mortality (aHR 1.53, 95% CI 1.25-1.88). In Model 4, the p values for depressive symptoms x health status interaction term was 0.003 (all-cause mortality), 0.01 (CVD death), 0.06 (nonCVD death), and 0.07 (cancer death). Results were similar without multiple imputations within 2 decimal places

**(Table 3)**



**Table 3. Association of baseline only elevated depressive symptoms (CES-D $\geq$ 4) with mortality outcomes. Each participant contributes 1 measure of CES-D at baseline.**

|                                                                                                                                                                                                                                                                                                                                                                                                                                                                     | Overall<br>n=29,491                             | Self-reported general<br>health as "excellent or<br>very good"<br>n=13,711 | Self-reported general health<br>as "poor, fair or good"<br>n=15,780 |
|---------------------------------------------------------------------------------------------------------------------------------------------------------------------------------------------------------------------------------------------------------------------------------------------------------------------------------------------------------------------------------------------------------------------------------------------------------------------|-------------------------------------------------|----------------------------------------------------------------------------|---------------------------------------------------------------------|
|                                                                                                                                                                                                                                                                                                                                                                                                                                                                     | HR (95%CI)                                      | HR (95%CI)                                                                 | HR (95%CI)                                                          |
| All-cause mortality                                                                                                                                                                                                                                                                                                                                                                                                                                                 | 4581                                            | 1392                                                                       | 3189                                                                |
| Crude                                                                                                                                                                                                                                                                                                                                                                                                                                                               | <b>1.54(1.42-1.68)</b>                          | <b>1.91(1.59-2.31)</b>                                                     | <b>1.18(1.07-1.30)</b>                                              |
| Model 1 <sup>a</sup>                                                                                                                                                                                                                                                                                                                                                                                                                                                | <b>1.57(1.44-1.72)</b>                          | <b>1.76(1.45-2.12)</b>                                                     | <b>1.34(1.21-1.47)</b>                                              |
| Model 2 <sup>b</sup>                                                                                                                                                                                                                                                                                                                                                                                                                                                | <b>1.32(1.25-1.49)</b>                          | <b>1.61(1.33-1.96)</b>                                                     | <b>1.22(1.11-1.35)</b>                                              |
| Model 3 <sup>c</sup>                                                                                                                                                                                                                                                                                                                                                                                                                                                | <b>1.32(1.27-1.44)</b>                          | <b>1.56(1.29-1.90)</b>                                                     | <b>1.20(1.09-1.32)</b>                                              |
| Model 4 <sup>d</sup>                                                                                                                                                                                                                                                                                                                                                                                                                                                | <b>1.18(1.07-1.29)</b>                          | <b>1.53(1.25-1.88)</b>                                                     | 1.09(0.98-1.20)                                                     |
| Model 4 + baseline CES-D<br>x self-reported health                                                                                                                                                                                                                                                                                                                                                                                                                  |                                                 |                                                                            |                                                                     |
|                                                                                                                                                                                                                                                                                                                                                                                                                                                                     | p-value for the interaction term - <b>0.002</b> |                                                                            |                                                                     |
| CVD Death                                                                                                                                                                                                                                                                                                                                                                                                                                                           | 1551                                            | 437                                                                        | 1114                                                                |
| Crude                                                                                                                                                                                                                                                                                                                                                                                                                                                               | <b>1.55(1.34-1.78)</b>                          | <b>2.16(1.58-2.96)</b>                                                     | <b>1.13(0.97-1.33)</b>                                              |
| Model 1 <sup>a</sup>                                                                                                                                                                                                                                                                                                                                                                                                                                                | <b>1.57(1.35-1.81)</b>                          | <b>1.96(1.42-2.71)</b>                                                     | <b>1.29(1.10-1.52)</b>                                              |
| Model 2 <sup>b</sup>                                                                                                                                                                                                                                                                                                                                                                                                                                                | <b>1.28(1.10-1.48)</b>                          | <b>1.71(1.23-2.38)</b>                                                     | 1.14(0.97-1.34)                                                     |
| Model 3 <sup>c</sup>                                                                                                                                                                                                                                                                                                                                                                                                                                                | <b>1.24(1.07-1.44)</b>                          | <b>1.70(1.22-2.36)</b>                                                     | 1.11(0.94-1.31)                                                     |
| Model 4 <sup>d</sup>                                                                                                                                                                                                                                                                                                                                                                                                                                                | 1.10(0.94-1.29)                                 | <b>1.63(1.16-2.30)</b>                                                     | 1.00(0.84-1.20)                                                     |
| Model 4 + baseline CES-D<br>x self-reported health                                                                                                                                                                                                                                                                                                                                                                                                                  |                                                 |                                                                            |                                                                     |
|                                                                                                                                                                                                                                                                                                                                                                                                                                                                     | p-value for the interaction term - <b>0.01</b>  |                                                                            |                                                                     |
| NonCVD Death                                                                                                                                                                                                                                                                                                                                                                                                                                                        | 3030                                            | 955                                                                        | 2075                                                                |
| Crude                                                                                                                                                                                                                                                                                                                                                                                                                                                               | <b>1.54(1.39-1.71)</b>                          | <b>1.80(1.42-2.26)</b>                                                     | <b>1.21(1.08-1.35)</b>                                              |
| Model 1 <sup>a</sup>                                                                                                                                                                                                                                                                                                                                                                                                                                                | <b>1.57(1.42-1.75)</b>                          | <b>1.66(1.31-2.10)</b>                                                     | <b>1.36(1.21-1.53)</b>                                              |
| Model 2 <sup>b</sup>                                                                                                                                                                                                                                                                                                                                                                                                                                                | <b>1.41(1.26-1.56)</b>                          | <b>1.56(1.29-1.98)</b>                                                     | <b>1.27(1.13-1.43)</b>                                              |
| Model 3 <sup>c</sup>                                                                                                                                                                                                                                                                                                                                                                                                                                                | <b>1.36(1.22-1.51)</b>                          | <b>1.49(1.17-1.90)</b>                                                     | <b>1.25(1.11-1.41)</b>                                              |
| Model 4 <sup>d</sup>                                                                                                                                                                                                                                                                                                                                                                                                                                                | <b>1.21(1.08-1.36)</b>                          | <b>1.48(1.15-1.89)</b>                                                     | <b>1.14(1.00-1.29)</b>                                              |
| Model 4 + baseline CES-D<br>x self-reported health                                                                                                                                                                                                                                                                                                                                                                                                                  |                                                 |                                                                            |                                                                     |
|                                                                                                                                                                                                                                                                                                                                                                                                                                                                     | p-value for the interaction term - <b>0.06</b>  |                                                                            |                                                                     |
| Cancer Death (a subset of<br>nonCVD death)                                                                                                                                                                                                                                                                                                                                                                                                                          | 1226                                            | 475                                                                        | 751                                                                 |
| Crude                                                                                                                                                                                                                                                                                                                                                                                                                                                               | <b>1.21(1.02-1.44)</b>                          | <b>1.63(1.16-2.30)</b>                                                     | 0.97(0.79-1.19)                                                     |
| Model 1 <sup>a</sup>                                                                                                                                                                                                                                                                                                                                                                                                                                                | <b>1.27(1.06-1.52)</b>                          | <b>1.58(1.12-2.23)</b>                                                     | 1.09(0.89-1.35)                                                     |
| Model 2 <sup>b</sup>                                                                                                                                                                                                                                                                                                                                                                                                                                                | <b>1.22(1.02-1.47)</b>                          | <b>1.53(1.08-2.17)</b>                                                     | 1.07(0.87-1.33)                                                     |
| Model 3 <sup>c</sup>                                                                                                                                                                                                                                                                                                                                                                                                                                                | 1.17(0.98-1.41)                                 | <b>1.45(1.02-2.05)</b>                                                     | 1.05(0.85-1.30)                                                     |
| Model 4 <sup>d</sup>                                                                                                                                                                                                                                                                                                                                                                                                                                                | 1.12(0.93-1.36)                                 | <b>1.49(1.03-2.13)</b>                                                     | 1.01(0.81-1.27)                                                     |
| Model 4 + baseline CES-D<br>x self-reported health                                                                                                                                                                                                                                                                                                                                                                                                                  |                                                 |                                                                            |                                                                     |
|                                                                                                                                                                                                                                                                                                                                                                                                                                                                     | p-value for the interaction term - <b>0.07</b>  |                                                                            |                                                                     |
| <sup>a</sup> Model 1 adjusts for <i>socio-demographics</i> (age, gender, region, income, health insurance, education)                                                                                                                                                                                                                                                                                                                                               |                                                 |                                                                            |                                                                     |
| <sup>b</sup> Model 2 adds to model 1 <i>medical conditions, physiological factors and medication use</i> (systolic blood pressure, total cholesterol, high density lipoprotein-cholesterol, use of aspirin, statins, antihypertensives, antidepressants, body mass index, logarithmically transformed Albumin to Creatinine Ratio; diabetes, cardiovascular disease, medication use as a proxy for chronic obstructive pulmonary disease, and cognitive impairment) |                                                 |                                                                            |                                                                     |
| <sup>c</sup> Model 3 adds to model 2 <i>behavioral risk factors</i> (pack-years of cigarette smoking, self-reported alcohol use, physical inactivity, medication non-adherence).                                                                                                                                                                                                                                                                                    |                                                 |                                                                            |                                                                     |
| <sup>d</sup> Model 4 adds to model 3 <i>other factors</i> (physical health component score of SF-12, log-transformed high sensitivity C-reactive protein and perceived stress)                                                                                                                                                                                                                                                                                      |                                                 |                                                                            |                                                                     |
| HR = hazard ratio; CVD cardiovascular disease; CES-D = Centers for Epidemiology Studies-Depression                                                                                                                                                                                                                                                                                                                                                                  |                                                 |                                                                            |                                                                     |
| HR and 95% CI were estimated by Cox proportional hazard regression models. Bold p-value < 0.05; Missing data in covariates imputed using chained equations.                                                                                                                                                                                                                                                                                                         |                                                 |                                                                            |                                                                     |

## Discussion

To our knowledge, this is the largest study to date to examine the relationship between depressive symptoms and all-cause and cause-specific mortality in non-institutionalized middle to older aged adults using multiple measurements of depressive symptoms and examining the role of health status. In this diverse cohort, we found that time-varying depressive symptoms significantly increased the risk of nonCVD and all-cause mortality in fully adjusted models. In fully adjusted models, depressive symptoms increased the risk of cause-specific and all-cause mortality by 36% to 54% in those with a very good/excellent state of health.

Given that depression is a relapsing/remitting disease,<sup>23</sup> this study markedly adds to the literature by demonstrating a time-varying relationship between elevated depressive symptoms and mortality, including cancer death. Major study strengths include the use of 3 measurements of depressive symptoms and stringent physician adjudication of outcomes. We were, however, unable to adjust for other time-varying covariates, which should be addressed in future research. For example, prior research suggests that changes in physical health (e.g., number of debilitating conditions) over time may mediate the relationship between depressive symptoms and mortality.<sup>24</sup>

We are also the first to report a significant moderating effect of self-reported health on the relationship between depressive symptoms and mortality. Many have long asked whether depression leads to mortality or whether individuals are depressed because they are dying. Our findings in those who report excellent states of health is striking and supports the former argument.

1 It may also be that the effect of chronic illness burden on mortality in those with poor health  
2 overwhelms the effects of depressive symptoms. Those with excellent health may also fail to  
3 recognize/present for depression. In fact, depressed excellent health individuals in our cohort were  
4 less likely to be on an antidepressant. Nonetheless, this finding should be further explored in future  
5 studies.  
6  
7  
8  
9  
10  
11  
12  
13

14 The overall results also have a coherence consistent with prior studies that suggest that depressive  
15 symptoms don't solely predict suicide and CVD mortality, but also predict other causes such as  
16 cancer death.<sup>25</sup> While prior literature suggests that depressive symptoms confer mortality in those  
17 with active cancer,<sup>26</sup> our study excluded active cancer diagnoses confirming a possible relationship  
18 between depressive symptoms and incident cancer mortality. Prior studies have also been limited by  
19 inadequate covariate control, and our results for cancer persisted after adjusting for numerous  
20 traditional and behavioral risk factors, such as smoking, and approached significance even in  
21 models that included physiologic factors.  
22  
23  
24  
25  
26  
27  
28  
29  
30  
31  
32  
33  
34

35 Overall, baseline and time varying analyses were similar. However, while our baseline analyses  
36 suggest that depressive symptoms significantly contribute to cancer death in those with  
37 excellent/very good health, time varying analyses allowed for more accurate analyses in line with  
38 expectations, suggesting a weaker interaction by health status for proximal cancer mortality in this  
39 cohort that excluded those with active malignancy.  
40  
41  
42  
43  
44  
45  
46  
47  
48

49 This study also supports comprehensive evidence-based depression care management in primary  
50 care practices, which have been shown to lower mortality risk.<sup>27</sup> Nonetheless, depression treatment  
51 remains suboptimal in the general population,<sup>28</sup> despite decades of efforts. We too demonstrate that  
52  
53  
54  
55  
56  
57  
58  
59  
60

1 over time, nearly 40% of patients with elevated depressive symptoms at baseline were still  
2 depressed on average 5 and 7 years later. Given the potentially shorter follow-up times in both  
3 time-varying analyses (by virtue of follow-up times being broken up by repeat depression  
4 measures) and baseline analyses (with 6.5 years of follow-up on average), these findings lend  
5 greater urgency to the importance of timely and effective treatment of depressive symptoms to  
6 prevent adverse consequences of depressive symptoms on physical health and mortality.  
7  
8  
9  
10  
11  
12  
13  
14

15  
16 Limitations of our study include the regional specificity, limiting generalizability, and use of the  
17 short form of the CES-D, which measures only emotional and not somatic symptoms of depression.  
18 Schultz (2002) demonstrated variance between studies using scales and interviews,<sup>29</sup> and others  
19 have posited even stronger findings in studies with clinical diagnoses (vs. continuous measures).<sup>30</sup>  
20 However, CES-D scales are one of the most widely used scales in clinical practice and in baseline  
21 depression to outcome studies and have good sensitivity and specificity.<sup>9,15,16</sup> We may also have  
22 been underpowered to examine CVD and cancer mortality, though the directionality of the  
23 estimates remained consistent. The exclusion of active cancer participants as part of the overall  
24 REGARDS study criteria, the rationale of which has previously been described,<sup>14</sup> may also have  
25 contributed to lack of power. Those with a *history* of malignancy or CVD were not specifically  
26 excluded, which is in line with prior depression to mortality studies.<sup>1,9</sup> Nonetheless, our previously  
27 published study, which excluded those with a history of CVD, similarly found a strong relationship  
28 between time-varying depressive symptoms and CVD death.<sup>31</sup>  
29  
30  
31  
32  
33  
34  
35  
36  
37  
38  
39  
40  
41  
42  
43  
44  
45  
46  
47

48 We were also unable to adjust for other psychiatric comorbidities, such as anxiety (though we  
49 included stress) or account for subclinical CVD and/or cancer. In addition, the follow-up time (6.5  
50 years) was relatively short compared to other studies and we saw even shorter follow-up times  
51 between CES-D measures in time-varying analyses, suggesting a short-term effect on mortality.  
52  
53  
54  
55  
56  
57  
58  
59  
60

1 Our results support prior literature suggesting that shorter follow-up time is associated with greater  
2 excess mortality.<sup>9,30</sup> However, we did not formally compare short-term to long-term follow-up nor  
3 persistent to fluctuating depressive symptoms nor examine depression as a time-varying coefficient.  
4  
5  
6  
7  
8  
9

10 Given our results of a relationship between time-varying depressive symptoms and mortality,  
11 further research is warranted to test the long-term efficacy of and adherence to depression treatment  
12 and to explore preventive approaches to decreasing premature mortality risk.<sup>32</sup> To our knowledge,  
13 the finding of a relationship between depressive symptoms and mortality in those with excellent or  
14 very good self-reported health is a new finding and should be further studied.  
15  
16  
17  
18  
19  
20  
21  
22  
23  
24  
25  
26  
27  
28  
29  
30  
31  
32  
33  
34  
35  
36  
37  
38  
39  
40  
41  
42  
43  
44  
45  
46  
47  
48  
49  
50  
51  
52  
53  
54  
55  
56  
57  
58  
59  
60

## References

1. Wulsin LR, Vaillant GE, Wells VE. A systematic review of the mortality of depression. *Psychosom Med.* 1999;61:6-17.
2. Sullivan MD, O'Connor P, Feeney P, et al. Depression Predicts All-Cause Mortality: Epidemiological evaluation from the ACCORD HRQL substudy. *Diabetes Care.* 2012;35:1708-1715.
3. Review: depression after myocardial infarction is associated with increased risk of all-cause mortality and cardiovascular events. *Evidence Based Mental Health.* 2013;16:110.
4. Barth J, Schumacher M, Herrmann-Lingen C. Depression as a risk factor for mortality in patients with coronary heart disease: a meta-analysis. *Psychosom Med.* 2004;66:802-813.
5. Cuijpers P, Vogelzangs N, Twisk J, et al. Comprehensive meta-analysis of excess mortality in depression in the general community versus patients with specific illnesses. *Am J Psychiatry.* 2014;171:453-462.
6. Cuijpers P, Smit F. Excess mortality in depression: a meta-analysis of community studies. *J Affect Disord.* 72:227-236.
7. Bruce ML, Leaf PJ, Rozal GP, Florio L, Hoff RA. Psychiatric status and 9-year mortality data in the New Haven Epidemiologic Catchment Area Study. *Am J Psychiatry.* 1994;151:716-721.
8. Surtees PG, Wainwright NW, Luben RN, et al. Depression and ischemic heart disease mortality: evidence from the EPIC-Norfolk United Kingdom prospective cohort study. *Am J Psychiatry.* 2008;165:515-523.
9. Pinquart M, Duberstein PR. Depression and cancer mortality: a meta-analysis. *Psychological medicine.* 2010;40:1797-1810.

10. Mols F, Husson O, Roukema JA, van de Poll-Franse LV. Depressive symptoms are a risk factor for all-cause mortality: results from a prospective population-based study among 3,080 cancer survivors from the PROFILES registry. *J Cancer Surviv.* 2013;7:484-492.
11. Lasserre AM, Marti-Soler H, Strippoli MP, et al. Clinical and course characteristics of depression and all-cause mortality: A prospective population-based study. *J Affect Disord.* 2016;189:17-24.
12. McGee DL, Liao Y, Cao G, Cooper RS. Self-reported Health Status and Mortality in a Multiethnic US Cohort. *Am J Epidemiol.* 1999;149:41-46.
13. Ambresin G, Chondros P, Dowrick C, Herrman H, Gunn JM. Self-Rated Health and Long-Term Prognosis of Depression. *Annals of Family Medicine.* 2014;12:57-65.
14. Howard VJ, Cushman M, Pulley L, et al. The reasons for geographic and racial differences in stroke study: objectives and design. *Neuroepidemiology.* 2005;25:135-143.
15. Melchior LA, Huba GJ, Brown VB, Reback CJ. A Short Depression Index for Women. *Educational and Psychological Measurement.* 1993;53:1117-1125.
16. Radloff LS. The ces-d scale: A self-report depression scale for research in the general population. *Appl Psychol Meas.* 1977;1:385-401.
17. Folstein MF, Folstein SE, McHugh PR. "Mini-mental state". A practical method for grading the cognitive state of patients for the clinician. *J Psychiatr Res.* 1975;12:189-198.
18. Callahan CM, Unverzagt FW, Hui SL, Perkins AJ, Hendrie HC. Six-item screener to identify cognitive impairment among potential subjects for clinical research. *Med Care.* 2002;40:771-781.
19. Morisky DE, Green LW, Levine DM. Concurrent and predictive validity of a self-reported measure of medication adherence. *Med Care.* 1986;24:67-74.

- 1       **20.**     Ware J, Jr., Kosinski M, Keller SD. A 12-Item Short-Form Health Survey: construction of  
2       scales and preliminary tests of reliability and validity. *Med Care.* 1996;34:220-233.
- 3  
4  
5       **21.**     Cohen S, Kamarck T, Mermelstein R. A global measure of perceived stress. *J Health Soc*  
6       *Behav.* 1983;24:385-396.
- 7  
8  
9  
10       **22.**     Simon R, Makuch RW. A non-parametric graphical representation of the relationship  
11       between survival and the occurrence of an event: Application to responder versus non-  
12       responder bias. *Statistics in Medicine.* 1984;3:35-44.
- 13  
14  
15       **23.**     Lin EH, Katon WJ, VonKorff M, et al. Relapse of depression in primary care. Rate and  
16       clinical predictors. *Arch Fam Med.* 1998;7:443-449.
- 17  
18  
19       **24.**     Houle JN. Depressive symptoms and all-cause mortality in a nationally representative  
20       longitudinal study with time-varying covariates. *Psychosom Med.* 2013;75:297-304.
- 21  
22  
23       **25.**     Mykletun A, Bjerkeset O, Dewey M, et al. Anxiety, depression, and cause-specific  
24       mortality: the HUNT study. *Psychosom Med.* 2007;69:323-331.
- 25  
26  
27       **26.**     Satin JR, Linden W, Phillips MJ. Depression as a predictor of disease progression and  
28       mortality in cancer patients: a meta-analysis. *Cancer.* 2009;115:5349-5361.
- 29  
30  
31       **27.**     Gallo JJ, Morales KH, Bogner HR, et al. Long term effect of depression care management  
32       on mortality in older adults: follow-up of cluster randomized clinical trial in primary care.  
33       *BMJ.* 2013;346:f2570.
- 34  
35  
36       **28.**     González HM, Vega WA, Williams DR, et al. Depression care in the united states: Too little  
37       for too few. *Arch Gen Psychiatry.* 2010;67:37-46.
- 38  
39  
40       **29.**     Schulz R, Drayer RA, Rollman BL. Depression as a risk factor for non-suicide mortality in  
41       the elderly. *Biol Psychiatry.* 2002;52:205-225.
- 42  
43  
44       **30.**     Pan A, Sun Q, Okereke OI, Rexrode KM, Hu FB. Depression and risk of stroke morbidity  
45       and mortality: a meta-analysis and systematic review. *JAMA.* 2011;306:1241-1249.
- 46  
47  
48  
49  
50  
51  
52  
53  
54  
55  
56  
57  
58  
59  
60



- 1  
2  
3  
4  
5  
6  
7  
8  
9  
10  
11  
12  
13  
14  
15  
16  
17  
18  
19  
20  
21  
22  
23  
24  
25  
26  
27  
28  
29  
30  
31  
32  
33  
34  
35  
36  
37  
38  
39  
40  
41  
42  
43  
44  
45  
46  
47  
48  
49  
50  
51  
52  
53  
54  
55  
56  
57  
58  
59  
60
- 31.** Moise N, Khodneva Y, Richman J, et al. Elucidating the Association Between Depressive Symptoms, Coronary Heart Disease, and Stroke in Black and White Adults: The REasons for Geographic And Racial Differences in Stroke (REGARDS) Study. *J Am Heart Assoc.* 2016;5.
- 32.** Kuyken W, Warren FC, Taylor RS, et al. Efficacy of Mindfulness-Based Cognitive Therapy in Prevention of Depressive Relapse: An Individual Patient Data Meta-analysis From Randomized Trials. *JAMA Psychiatry.* 2016;73:565-574.

## ACKNOWLEDGEMENTS

**Funding:** This research project is supported by a cooperative agreement U01 NS041588 from the National Institute of Neurological Disorders and Stroke, National Institutes of Health, Department of Health and Human Service. The REGARDS study was supported by NIH grant 2U01NS041588; REGARDS-MI study was supported by NIH grants R01 HL080477 and K24 HL111154. The content is solely the responsibility of the authors and does not necessarily represent the official views of the National Institute of Neurological Disorders and Stroke or the National Institutes of Health. Representatives of the funding agency have been involved in the review of the manuscript but not directly involved in the collection, management, analysis, or interpretation of the data. The authors thank the other investigators, the staff, and the participants of the REGARDS study for their valuable contributions. A full list of participating REGARDS investigators and institutions can be found at <http://www.regardsstudy.org>. This work was also supported by funds from NHLBI (3 R01 HL114924-03S1; HL080477; and K24 HL111154).

**Disclosures:** All authors have completed the ICMJE uniform disclosure form at [www.icmje.org/coi\\_disclosure.pdf](http://www.icmje.org/coi_disclosure.pdf) and declare: no support from any organisation for the submitted work; no financial relationships with any organisations that might have an interest in the submitted work in the previous three years; no other relationships or activities that could appear to have influenced the submitted work.

**Author Contributions:** Drs. Yulia Khodneva and Joshua Richman had full access to all the data in the study and take responsibility for the integrity of the data and the accuracy of the data analysis. *Study concept and design:* Moise, Khodneva, Safford; *Acquisition of data:* Khodneva, Safford; *Analysis and interpretation of data:* Khodneva, Moise, Jannat-Khah, Richman, Kronish, Shaffer, Safford; *Drafting of the manuscript:* Moise, Khodneva *Critical revision of manuscript for important intellectual content:* Moise, Khodneva, Jannat-Khah, Richman, Kronish, Davidson,

1 Shaffer, Safford; *Statistical analysis*: Khodneva, Jannat-Khah; *Obtained funding*: Safford; *Study*  
2  
3 *supervision*: Safford  
4

5 **Conflict of Interest:** None  
6  
7

8  
9 **Copyright:** The Corresponding Author has the right to grant on behalf of all authors and does grant  
10 on behalf of all authors, a worldwide licence to the Publishers and its licensees in perpetuity, in all  
11 forms, formats and media (whether known now or created in the future), to i) publish, reproduce,  
12 distribute, display and store the Contribution, ii) translate the Contribution into other languages,  
13 create adaptations, reprints, include within collections and create summaries, extracts and/or,  
14 abstracts of the Contribution, iii) create any other derivative work(s) based on the Contribution, iv)  
15 to exploit all subsidiary rights in the Contribution, v) the inclusion of electronic links from the  
16 Contribution to third party material where-ever it may be located; and, vi) licence any third party to  
17 do any or all of the above.  
18  
19

20  
21 **Transparency:** Dr. Moise affirms that the manuscript is an honest, accurate, and transparent  
22 account of the study being reported; that no important aspects of the study have been omitted; and  
23 that any discrepancies from the study as planned (and, if relevant, registered) have been explained.  
24  
25

26  
27 **Data Sharing:** Patient level data or full dataset or technical appendix or statistical code are  
28 available if deemed important by reviewers with open access by Monika Safford at Weill Cornell,  
29 Nathalie Moise at Columbia University Medical Center, and Yulia Khodneva at University of  
30 Alabama at Birmingham. Patient consent was not obtained but the presented data are anonymised  
31 and risk of identification is low.  
32  
33  
34  
35  
36  
37  
38  
39  
40  
41  
42  
43  
44  
45  
46  
47  
48  
49  
50  
51  
52  
53  
54  
55  
56  
57  
58  
59  
60

1  
2  
3  
4  
5  
6  
7  
8  
9  
10  
11  
12  
13  
14  
15  
16  
17  
18  
19  
20  
21  
22  
23  
24  
25  
26  
27  
28  
29  
30  
31  
32  
33  
34  
35  
36  
37  
38  
39  
40  
41  
42  
43  
44  
45  
46  
47  
48  
49  
50  
51  
52  
53  
54  
55  
56  
57  
58  
59  
60

**Figure Legend**

**Figure 1.** Cohort Flow Diagram: Exclusion cascade of depressive symptoms to mortality endpoints analysis.

For peer review only



Figure 1. Consort Diagram

279x215mm (300 x 300 DPI)

## Supplementary Material

**eTable 1. Proportion of persons with elevated depressive symptoms by baseline self-reported health status (original categories, without collapsing).**

| Self-reported general health | Baseline                      |               |          | Second CES-D                    |               |          | Third CES-D                      |               |          |
|------------------------------|-------------------------------|---------------|----------|---------------------------------|---------------|----------|----------------------------------|---------------|----------|
|                              | CES-D<4, n, %                 | CES-D≥4, n, % | Total, n | CESD<4, n, %                    | CES-D≥4, n, % | Total, n | CESD<4, n, %                     | CES-D≥4, n, % | Total, n |
| <b>Excellent</b>             | 4515<br>95.9 %                | 195<br>4.1%   | 4710     | 3444<br>94.7%                   | 194<br>5.3%   | 3638     | 2109<br>94.6%                    | 120<br>5.4%   | 2229     |
| <b>Very good</b>             | 8450<br>94.1%                 | 530<br>5.9%   | 8980     | 6332<br>93.0%                   | 478<br>7.0%   | 6810     | 3938<br>92.8%                    | 305<br>7.2%   | 4243     |
| <b>Good</b>                  | 9181<br>89.1%                 | 1124<br>10.9% | 10305    | 6363<br>88.6%                   | 818<br>11.4%  | 7181     | 3717<br>88.9%                    | 464<br>11.1%  | 4181     |
| <b>Fair</b>                  | 3424<br>77.8 %                | 975<br>22.2 % | 4399     | 2185<br>79.7%                   | 556<br>20.3%  | 2741     | 1236<br>82.0%                    | 271<br>18.0%  | 1507     |
| <b>Poor</b>                  | 614<br>59.2%                  | 424<br>40.9%  | 1038     | 322<br>61.2%                    | 204<br>38.8%  | 526      | 177<br>65.3%                     | 94<br>34.7%   | 271      |
|                              |                               |               | 29432    |                                 |               | 20896    |                                  |               | 12431    |
|                              | <b>Frequency Missing = 59</b> |               |          | <b>Frequency Missing = 8595</b> |               |          | <b>Frequency Missing = 17060</b> |               |          |

**eTable 2. Reasons for non-cardiovascular disease death in the REGARDS study**

| <i>Causes of Death</i>            | Overall                 |         | Self-reported general health as “excellent or very good”<br>n=13,711 |                         | Self-reported general health as “poor, fair or good”<br>n=15,780 |         |
|-----------------------------------|-------------------------|---------|----------------------------------------------------------------------|-------------------------|------------------------------------------------------------------|---------|
|                                   | n                       | Percent | Frequency                                                            | Percent                 | Frequency                                                        | Percent |
| Cancer                            | 1226                    | 44.3    | 474                                                                  | 54.0                    | 747                                                              | 39.7    |
| Accidents/Injury/Suicide/Homicide | 164                     | 5.9     | 52                                                                   | 5.9                     | 111                                                              | 5.9     |
| Suicide                           | 3                       | 0.1     | 2                                                                    | 0.2                     | 1                                                                | 0.05    |
| Liver disease                     | 56                      | 2.0     | 14                                                                   | 1.6                     | 42                                                               | 2.2     |
| Infection                         | 498                     | 18.0    | 132                                                                  | 15.0                    | 365                                                              | 19.4    |
| ESRD                              | 119                     | 4.3     | 23                                                                   | 2.6                     | 95                                                               | 5.1     |
| Dementia                          | 187                     | 6.8     | 74                                                                   | 8.4                     | 112                                                              | 6.0     |
| COPD                              | 247                     | 8.9     | 43                                                                   | 4.9                     | 204                                                              | 10.9    |
| Pulmonary Embolism                | 38                      | 1.34    | 11                                                                   | 1.3                     | 27                                                               | 1.4     |
| Other                             | 232                     | 8.4     | 55                                                                   | 6.3                     | 177                                                              | 9.4     |
|                                   | Frequency Missing = 263 |         |                                                                      | Frequency Missing = 272 |                                                                  |         |

**eFigure 1. Percent of participants with depression measured at baseline who had their second and third follow up measured by years of follow up.**



\*"Percent" is a proportion of participants reporting CES-D scores at certain times of all participants available for either 2<sup>nd</sup> follow-up (blue) or 3<sup>rd</sup> follow-up (red).

|              | Participants, n | Mean | SD  | Minimum | Maximum |
|--------------|-----------------|------|-----|---------|---------|
| Second CES-D | 20934           | 4.8  | 1.5 | 0.9     | 9.7     |
| Third CES-D  | 12451           | 2.1  | 0.4 | 1.0     | 4.2     |



eFigure 2. Timing of CES-D follow up measures in REGARDS by self reported health at baseline.



\*"Percent" is a proportion of participants reporting CES-D scores at certain times, of all participants available for either 2<sup>nd</sup> follow-up (blue) or 3<sup>rd</sup> follow-up (red).

|              | Self-reported general health as "excellent or very good" |                                                                              |     |         |         | Self-reported general health as "poor, fair or good" |                                                                              |     |         |         |
|--------------|----------------------------------------------------------|------------------------------------------------------------------------------|-----|---------|---------|------------------------------------------------------|------------------------------------------------------------------------------|-----|---------|---------|
|              |                                                          | Time since preceding CES-D measurement (baseline or second follow-up), years |     |         |         |                                                      | Time since preceding CES-D measurement (baseline or second follow-up), years |     |         |         |
|              | N                                                        | Mean                                                                         | SD  | Minimum | Maximum | N                                                    | Mean                                                                         | SD  | Minimum | Maximum |
| Second CES-D | 10448                                                    | 4.8                                                                          | 1.5 | 0.9     | 9.7     | 10448                                                | 4.8                                                                          | 1.5 | 0.9     | 9.5     |
| Third CES-D  | 6472                                                     | 2.1                                                                          | 0.4 | 1.7     | 4.2     | 5959                                                 | 2.1                                                                          | 0.5 | 1.0     | 4.2     |

**eTable 3. Baseline characteristics of REGARDS participants who had all 3 CES-D measures vs. those with 1 or 2 CES-D measures**

| Characteristics                                          | 1 or 2 CES-D<br>measures<br>(n=17,040) | All 3 CES-D<br>measures<br>(n=12, 451) | <i>p</i> value |
|----------------------------------------------------------|----------------------------------------|----------------------------------------|----------------|
| <b><i>Socio-demographics</i></b>                         |                                        |                                        |                |
| Age, <i>M</i> (SD)                                       | 65.0 +- 10.0                           | 64.7 +- 8.5                            | 0.0069         |
| Female, n (%)                                            | 9300 (54.6)                            | 6945 (55.8)                            | 0.04           |
| African American, n (%)                                  | 7709 (45.2)                            | 4420 (35.5)                            | <.001          |
| Less than high school education, n (%)                   | 2583 (15.2)                            | 1113 (8.9)                             | <.001          |
| Annual Household Income, n (%)                           |                                        |                                        | <.001          |
| Less than \$20,000                                       | 3549 (20.8)                            | 1773 (14.2)                            |                |
| No Health Insurance, n (%)                               | 1290 (7.6)                             | 636 (5.1)                              | <.001          |
| Region, n (%)                                            |                                        |                                        | <.001          |
| Stroke belt                                              | 5806 (34.1)                            | 4387 (35.2)                            |                |
| Stroke buckle                                            | 3887 (22.8)                            | 2301 (18.5)                            |                |
| Non-stroke belt or buckle                                | 7347 (43.1)                            | 5763 (46.3)                            |                |
| <b><i>General health and medical conditions</i></b>      |                                        |                                        |                |
| Self-reported general health, n (%)                      |                                        |                                        | <.001          |
| Poor, fair, good                                         | 9783 (57.5)                            | 5959 (47.9)                            |                |
| Excellent, very good                                     | 7218 (42.5)                            | 6472 (52.1)                            |                |
| Cardiovascular disease (CHD, stroke, PAD, AA), n (%)     | 4379 (25.7)                            | 2446 (19.6)                            | <.001          |
| Diabetes, n (%)                                          | 4083 (25.0)                            | 2169 (18.0)                            | <.001          |
| COPD, n (%)                                              | 1612 (9.5)                             | 1098 (8.8)                             | 0.05           |
| Physical component score on SF-12 scale, <i>M</i> (SD)   | 45.5 +- 11.0                           | 47.6 +- 9.9                            | <.001          |
| <b><i>Physiological risk factors</i></b>                 |                                        |                                        |                |
| Body Mass Index, kg/m <sup>2</sup> , <i>M</i> (SD)       | 29.4 +- 6.3                            | 29.2 +- 6.0                            | 0.0024         |
| Systolic Blood Pressure, mmHg, <i>M</i> (SD)             | 128.0 +- 17.2                          | 127.0 +- 15.9                          | <.001          |
| Total Cholesterol, mg/dL, <i>M</i> (SD)                  | 192.2 +- 41.0                          | 191.9 +- 39.0                          | 0.5732         |
| High-Density Lipoprotein, mg/dL, <i>M</i> (SD)           | 51.4 +- 16.1                           | 52.4 +- 16.3                           | <.001          |
| QT Interval, corrected for heart rate, ms, <i>M</i> (SD) | 408.4 +- 24.2                          | 406.3 +- 22.7                          | <.001          |
| High-Sensitivity C-Reactive Protein, mg/L, median, IQR   | 2.3[1.0-5.4]                           | 2.1[0.9-4.7]                           | <.001          |

|    |                                                      |               |               |       |
|----|------------------------------------------------------|---------------|---------------|-------|
| 1  | Albumin to Creatinine Ratio, mg/g, median,           |               |               |       |
| 2  | IQR                                                  | 7.9[4.8-18.7] | 6.9[4.5-13.5] | <.001 |
| 3  | <b>Medications</b>                                   |               |               |       |
| 4  | Antihypertensive medication use, n (%)               | 9079 (53.9)   | 6118 (49.7)   | <.001 |
| 5  | Statin use, n (%)                                    | 5344 (31.4)   | 3951 (31.8)   | 0.53  |
| 6  | Aspirin use, n (%)                                   | 7297 (42.8)   | 5493 (44.1)   | 0.03  |
| 7  | Antidepressant use, n (%)                            | 2440 (14.4)   | 1646 (13.2)   | 0.006 |
| 8  | <b>Behavioral risk factors</b>                       |               |               |       |
| 9  |                                                      |               |               |       |
| 10 | Self-reported smoking, pack years, <i>M</i> (SD)     | 14.5 +- 24.4  | 12.2 +- 21.0  | <.001 |
| 11 | Current Smoking, n(%)                                | 2786 (16.4)   | 1477 (11.9)   | <.001 |
| 12 | Alcohol use, n (%)                                   |               |               | <.001 |
| 13 | Heavy                                                | 652 (3.9)     | 520 (4.2)     |       |
| 14 | Moderate                                             | 5180 (31.1)   | 4446 (36.3)   |       |
| 15 | None                                                 | 10822 (65.0)  | 7294 (59.5)   |       |
| 16 | Physical inactivity, n (%)                           | 6150 (36.7)   | 3854 (31.3)   | <.001 |
| 17 | Medication non-adherence, n (%)                      | 4548 (29.6)   | 3411 (29.9)   | 0.59  |
| 18 | Impaired cognitive status (Cognitive score $\leq$ 4) | 1300 (9.4)    | 588 (5.9)     | <.001 |
| 19 | Elevated perceived stress (PSS $\geq$ 5)             | 5437 (31.9)   | 3154 (25.3)   | <.001 |
| 20 |                                                      |               |               |       |
| 21 |                                                      |               |               |       |

22 *p* Values from chi square, Student t tests. CES-D = Centers for Epidemiology Studies – Depression scale. CVD =  
 23 cardiovascular disease. IQR = interquartile range. *M* = mean. SD = standard deviation.

24 Stroke Belt defined as the states of Alabama, Arkansas, Louisiana, Mississippi, Tennessee and the noncoastal regions  
 25 within the states of North Carolina, South Carolina and Georgia. Stroke buckle defined as coastal regions within the states  
 26 of North Carolina, South Carolina and Georgia.

27 Diabetes defined as fasting blood glucose  $\geq$ 126 or random glucose  $>$ 200 mL/dL or oral hypoglycemic or insulin use. CVD  
 28 defined as baseline coronary heart disease, stroke, periphery artery disease or aortic aneurism.

**eFigure 3. Simon and Makuch plots of time-varying depressive symptoms and all-cause mortality, cardiovascular disease death, noncardiovascular disease death and cancer death.**



STROBE Statement—Checklist of items that should be included in reports of *cohort studies*

|                           | Item No/Page #    | Recommendation                                                                                                                                                                 |
|---------------------------|-------------------|--------------------------------------------------------------------------------------------------------------------------------------------------------------------------------|
| <b>Title and abstract</b> | 1 (page 1-3)      | (a) Indicate the study's design with a commonly used term in the title or the <b>abstract</b>                                                                                  |
|                           | (Page 2-3)        | (b) Provide in the abstract an informative and balanced summary of what was done and what was found                                                                            |
| <b>Introduction</b>       |                   |                                                                                                                                                                                |
| Background/rationale      | 2 (Page 4)        | Explain the scientific background and rationale for the investigation being reported                                                                                           |
| Objectives                | 3 (pages 4-5)     | State specific objectives, including any prespecified hypotheses                                                                                                               |
| <b>Methods</b>            |                   |                                                                                                                                                                                |
| Study design              | 4 (Page 5 and 6)  | Present key elements of study design early in the paper                                                                                                                        |
| Setting                   | 5 (page 5-10),    | Describe the setting, locations, and relevant dates, including periods of recruitment, exposure, follow-up, and data collection                                                |
| Participants              | 6 (page 5-6, 8-9) | (a) Give the eligibility criteria, and the sources and methods of selection of participants. Describe methods of follow-up                                                     |
|                           | n/a               | (b) For matched studies, give matching criteria and number of exposed and unexposed                                                                                            |
| Variables                 | 7 (page 6-8)      | Clearly define all outcomes, exposures, predictors, potential confounders, and effect modifiers. Give diagnostic criteria, if applicable                                       |
| Data sources/ measurement | 8 (pages 6-9)     | For each variable of interest, give sources of data and details of methods of assessment (measurement). Describe comparability of assessment methods if there is more than one |

|                        |                 |                                                                                                                                                                                                   |
|------------------------|-----------------|---------------------------------------------------------------------------------------------------------------------------------------------------------------------------------------------------|
|                        |                 | group                                                                                                                                                                                             |
| Bias                   | 9 (page 8-10)   | Describe any efforts to address potential sources of bias                                                                                                                                         |
| Study size             | 10 (page 10)    | Explain how the study size was arrived at                                                                                                                                                         |
| Quantitative variables | 11 (page 6-10)  | Explain how quantitative variables were handled in the analyses. If applicable, describe which groupings were chosen and why                                                                      |
| Statistical methods    | 12 (page 8-10)  | (a) Describe all statistical methods, including those used to control for confounding                                                                                                             |
|                        | Pages 9         | (b) Describe any methods used to examine subgroups and interactions                                                                                                                               |
|                        | Page 10         | (c) Explain how missing data were addressed                                                                                                                                                       |
|                        | Page 9          | (d) If applicable, explain how loss to follow-up was addressed                                                                                                                                    |
|                        | Page 9-10       | (e) Describe any sensitivity analyses                                                                                                                                                             |
| <b>Results</b>         |                 |                                                                                                                                                                                                   |
| Participants           | 13 (page 10)    | (a) Report numbers of individuals at each stage of study—eg numbers potentially eligible, examined for eligibility, confirmed eligible, included in the study, completing follow-up, and analysed |
|                        | Page 10         | (b) Give reasons for non-participation at each stage                                                                                                                                              |
|                        | Figure 1        | (c) Consider use of a flow diagram                                                                                                                                                                |
| Descriptive data       | 14 (page 10-11) | (a) Give characteristics of study participants (eg demographic, clinical, social) and information on exposures and potential confounders                                                          |
|                        | Page 10         | (b) Indicate number of participants with missing data for each variable of interest                                                                                                               |
|                        | Pages 12        | (c) Summarise follow-up time (eg, average and total amount)                                                                                                                                       |

|                          |                  |                                                                                                                                                                                                              |
|--------------------------|------------------|--------------------------------------------------------------------------------------------------------------------------------------------------------------------------------------------------------------|
| Outcome data             | 15 (page 11)     | Report numbers of outcome events or summary measures over time                                                                                                                                               |
| Main results             | 16 (pages 11-12) | (a) Give unadjusted estimates and, if applicable, confounder-adjusted estimates and their precision (eg, 95% confidence interval). Make clear which confounders were adjusted for and why they were included |
|                          | Page 7-8, 23-27  | (b) Report category boundaries when continuous variables were categorized                                                                                                                                    |
|                          | n/a              | (c) If relevant, consider translating estimates of relative risk into absolute risk for a meaningful time period                                                                                             |
| Other analyses           | 17 (pages 12)    | Report other analyses done—eg analyses of subgroups and interactions, and sensitivity analyses                                                                                                               |
| <b>Discussion</b>        |                  |                                                                                                                                                                                                              |
| Key results              | 18 (page 12)     | Summarise key results with reference to study objectives                                                                                                                                                     |
| Limitations              | 19 (pages 14-15) | Discuss limitations of the study, taking into account sources of potential bias or imprecision. Discuss both direction and magnitude of any potential bias                                                   |
| Interpretation           | 20 (page 12-13)  | Give a cautious overall interpretation of results considering objectives, limitations, multiplicity of analyses, results from similar studies, and other relevant evidence                                   |
| Generalisability         | 21 (page 14)     | Discuss the generalisability (external validity) of the study results                                                                                                                                        |
| <b>Other information</b> |                  |                                                                                                                                                                                                              |
| Funding                  | 22 (page 20)     | Give the source of funding and the role of the funders for the present study and, if applicable, for the original study on which the present                                                                 |

|  |  |                  |
|--|--|------------------|
|  |  | article is based |
|--|--|------------------|

\*Give information separately for exposed and unexposed groups.

**Note:** An Explanation and Elaboration article discusses each checklist item and gives methodological background and published examples of transparent reporting. The STROBE checklist is best used in conjunction with this article (freely available on the Web sites of PLoS Medicine at <http://www.plosmedicine.org/>, Annals of Internal Medicine at <http://www.annals.org/>, and Epidemiology at <http://www.epidem.com/>). Information on the STROBE Initiative is available at <http://www.strobe-statement.org>.

For peer review only



# BMJ Open

## An observational study of the differential impact of time-varying depressive symptoms on all-cause and cause-specific mortality by health status in community dwelling adults: The REGARDS study

|                                 |                                                                                                                                                                                                                                                                                                                                                                                                                                                                                                                                                                                                                                               |
|---------------------------------|-----------------------------------------------------------------------------------------------------------------------------------------------------------------------------------------------------------------------------------------------------------------------------------------------------------------------------------------------------------------------------------------------------------------------------------------------------------------------------------------------------------------------------------------------------------------------------------------------------------------------------------------------|
| Journal:                        | <i>BMJ Open</i>                                                                                                                                                                                                                                                                                                                                                                                                                                                                                                                                                                                                                               |
| Manuscript ID                   | bmjopen-2017-017385.R4                                                                                                                                                                                                                                                                                                                                                                                                                                                                                                                                                                                                                        |
| Article Type:                   | Research                                                                                                                                                                                                                                                                                                                                                                                                                                                                                                                                                                                                                                      |
| Date Submitted by the Author:   | 20-Nov-2017                                                                                                                                                                                                                                                                                                                                                                                                                                                                                                                                                                                                                                   |
| Complete List of Authors:       | Moise, Nathalie; Columbia University Medical Center, Center for Behavioral Cardiovascular Health<br>Khodneva, Yulia; University of Alabama School of Medicine<br>Jannat-Khah, Deanna; NewYork-Presbyterian Hospital/Weill Cornell Medical Center<br>Richman, Joshua; University of Alabama School of Medicine<br>Davidson, Karina; Columbia University Medical Center, Medicine<br>Kronish, Ian M. ; Columbia University Medical Center, Center Behavioral Cardiovascular Health<br>Shaffer, Jonathan; University of Colorado Denver Department of Psychology<br>Safford, Monika; Cornell University Joan and Sanford I Weill Medical College |
| <b>Primary Subject Heading</b>: | Mental health                                                                                                                                                                                                                                                                                                                                                                                                                                                                                                                                                                                                                                 |
| Secondary Subject Heading:      | Mental health                                                                                                                                                                                                                                                                                                                                                                                                                                                                                                                                                                                                                                 |
| Keywords:                       | mortality, health status, Depression & mood disorders < PSYCHIATRY                                                                                                                                                                                                                                                                                                                                                                                                                                                                                                                                                                            |
|                                 |                                                                                                                                                                                                                                                                                                                                                                                                                                                                                                                                                                                                                                               |

SCHOLARONE™  
Manuscripts

1 **An observational study of the differential impact of time-varying depressive symptoms on**  
2  
3 **all-cause and cause-specific mortality by health status in community dwelling adults: The**  
4  
5 **REGARDS study**

6  
7  
8 **Running Title:** depressive symptoms and mortality

9  
10 **Authors:** Nathalie Moise, MD, MS<sup>1</sup> (assistant professor); Yulia Khodneva, MD, PhD<sup>2</sup> (medical  
11 resident); Deanna Pereira Jannat-Khah, DrPH, MSPH<sup>3</sup> (senior research data analyst); Joshua  
12 Richman, MD, PhD<sup>2</sup> (associate professor); Karina W. Davidson, PhD<sup>1</sup> (professor); Ian M.  
13 Kronish, MD, MPH<sup>1</sup> (assistant professor); Jonathan Shaffer, PhD<sup>4</sup> (assistant professor); Monika  
14 M. Safford, MD<sup>3</sup> (professor)

15  
16 **Affiliations:** <sup>1</sup>Center for Behavioral Cardiovascular Health, Department of Medicine, Division of  
17 Cardiology, Columbia University Medical Center, New York, NY; <sup>2</sup>University of Alabama at  
18 Birmingham, Birmingham, AL; <sup>3</sup>Weill Cornell Medical College, New York, NY.

19  
20  
21  
22  
23  
24 <sup>4</sup>Department of Psychology, University of Colorado Denver;

25  
26 **Corresponding Author:**

27 Nathalie Moise, MD, MS  
28 Center for Behavioral and Cardiovascular Health, Department of Medicine  
29 Columbia University Medical Center  
30 622 W. 168<sup>th</sup> Street, PH9- Room 321  
31 New York, NY 10032  
32 Phone: 212-342-2889  
33 Fax: 212-342-3431  
34 Email: [nm2562@cumc.columbia.edu](mailto:nm2562@cumc.columbia.edu)

35  
36  
37 **Journal Subject Codes:** mortality, depression, health status

38  
39  
40 **Total Document Text Count:** 3063

41  
42 **Abstract:** 240/300  
43  
44  
45  
46  
47  
48  
49  
50  
51  
52  
53  
54  
55  
56  
57  
58  
59  
60

## Abstract

**Objective:** To assess the association between time-varying depressive symptoms with all-cause and cause-specific mortality

**Design:** The Reasons for Geographic and Racial Differences in Stroke (REGARDS) is a national, population-based longitudinal study conducted from 2003-2007.

**Setting:** General continental U.S. communities

**Participants:** 29,491 black and white U.S. adults  $\geq 45$  years randomly sampled within race-sex-geographic strata

**Exposure:** Elevated depressive symptoms (CES-D-4  $\geq 4$ ) measured at baseline and on average 5 and 7 years later

**Main Outcome Measures:** Cox proportional hazard regression models assessed cancer, non-cardiovascular (CVD), CVD and all-cause mortality.

**Results:** The average age was 64.9 years; 55% were female; 41% black; 11.0% had elevated depressive symptoms; 54% had poor, fair or good health. Time-varying depressive symptoms were significantly associated with nonCVD (aHR=1.29, 95% CI 1.16-1.44) and all-cause (aHR=1.24, 95%CI 1.14-1.39), but not cancer (aHR=1.15, 95%CI 0.96-1.38) or CVD (aHR=1.13, 95%CI 0.98-1.32) death adjusting for demographics, chronic clinical diseases, behavioral risk factors, and physiologic factors. Depressive symptoms were related to all-cause (aHR=1.48, 95%CI 1.27-1.78), CVD (aHR=1.37, 95%CI 0.99-1.91), nonCVD (aHR=1.54, 95%CI 1.24-1.92) and cancer (aHR=1.36 95% 0.97-1.91) death in those who reported excellent or very good health. The analyses of the association between one measure of baseline depressive symptoms and mortality analyses yielded similar results.

1 **Conclusions:** Time-varying depressive symptoms confer an increased risk for all-cause  
2  
3 mortality, CVD, non-CVD death and cancer death, particularly in those with excellent or very  
4  
5 good health. These findings may have implications for timely treatment, regardless of health  
6  
7 status.  
8  
9

### 10 11 12 **Strengths and limitations of this study.** 13

- 14 • Depression is a relapsing/remitting disease and our study is one of the first to use multiple  
15 measurements of depression to demonstrate a time varying relationship between  
16 depression and mortality, including cancer mortality, in a large, diverse cohort.  
17  
18
- 19 • To our knowledge, we are also the first to report a significant moderating effect of self-  
20 reported health on the relationship between depressive symptoms and cause-specific  
21 mortality, with depression predicting mortality particularly in those with excellent or very  
22 good reported health.  
23  
24
- 25 • Our analyses were limited by the use of the short form of the CES-D scale  
26  
27
- 28 • The REGARDS cohort is regionally specific, limiting generalizability.  
29  
30  
31  
32  
33  
34  
35  
36  
37  
38  
39  
40  
41  
42  
43  
44  
45  
46  
47  
48  
49  
50  
51  
52  
53  
54  
55  
56  
57  
58  
59  
60

## Introduction

It is well known that elevated depressive symptoms predict mortality,<sup>1</sup> both in high-risk individuals with chronic illnesses like cardiovascular disease (CVD), and in general populations.<sup>2-4 5-8</sup> More recently, several studies have shown that depressive symptoms both preceding and following cancer diagnosis may confer an increased risk of cancer death as well.<sup>9,10</sup>

However, depressive symptoms relapse and remit, and prior studies on the relationship between depressive symptoms and mortality have been limited by one measurement of depressive symptoms.<sup>1</sup> Recently, Lasserre et al. (2016) found that current but not remitted depressive symptoms predict all-cause mortality, but again depression diagnoses and history were ascertained at one time point.<sup>11</sup> In addition, prior literature has often been marked by inadequate adjustment for important covariates, such as behavioral risk factors. To our knowledge, few if any prior studies have examined the time-varying association between depressive symptoms and excess causes of death, including all-cause and cause specific mortality. In addition, self-perceived health status may predict mortality<sup>12</sup> and complicate the relationship between depressive symptoms and poor outcomes.<sup>13</sup> It is unknown whether depressive symptoms confer an increased risk of excess mortality equally in those with self-reported excellent/very good (in whom depression may be less likely to be recognized) and good/fair/poor health.

The purpose of our study is to examine the association between time-varying depressive symptoms with cancer, CVD, nonCVD and all-cause mortality in the Reasons for Geographic and Racial Differences in Stroke (REGARDS) study, a broad, diverse population cohort with repeat measurements of depressive symptoms. We stratify by self-reported baseline health status

1 (very good or excellent vs. poor, fair or good) to further isolate the association between  
2  
3 depressive symptoms and excess mortality.  
4  
5  
6  
7

## 8 **Methods**

9  
10 The REGARDS study is a national cohort study of stroke incidence and cognitive decline in  
11 black and white community dwelling adults  $\geq 45$  years living in the United States stratified to  
12 reflect specific race-sex-geographic strata.<sup>14</sup> Inclusion and exclusion criteria have been  
13 previously described; of note, those with active cancer were excluded from the original study.<sup>14</sup>  
14  
15 Coronary heart disease (CHD) outcomes were ascertained from a REGARDS-MI ancillary study.  
16  
17 Participants were recruited by mail using commercially available lists of U.S. residents, followed  
18 by a computer-assisted telephone interview and subsequent home visit at which time individuals  
19 were consented and enrolled. Between January 2003 and October 2007, 30,239 black and white  
20 adults were enrolled. Of these, 489 (1.6%) were lost to follow-up and 208 (0.7%) were missing  
21 baseline depressive symptom measurements (**Figure 1**). The REGARDS study protocol was  
22 approved by institutional review boards at participating centers.  
23  
24  
25  
26  
27  
28  
29  
30  
31  
32  
33  
34  
35  
36  
37

### 38 *Study Procedures*

39  
40 Baseline data were collected through computer-assisted telephone interviews, an in-home  
41 examination, and self-administered questionnaires. Trained research staff conducted telephone  
42 interviews to collect demographic data, medical history and behavioral risk factors. Following  
43 the telephone interview, individuals had an in-home visit during which physical measurements, a  
44 resting electrocardiogram, medication inventory, phlebotomy and urine were collected. The  
45 median time between the initial phone interview and in-home examination was 28.0  
46  
47 (interquartile range = 21.0) days.  
48  
49  
50  
51  
52  
53  
54  
55  
56  
57  
58  
59  
60

### *Primary Outcomes*

The primary outcomes for these analyses were (1) cancer mortality (all body sites) (2) CVD death defined as death from CHD, stroke, heart failure, sudden cardiac death, vascular pathology, and other CVD causes (3) non-CVD death and (4) all-cause mortality. Living participants or their proxies were followed up every 6 months by telephone with retrieval of medical records for reported hospitalizations or physician visits. Deaths were detected by report of next-of-kin or through online services (e.g., Social Security Death Index) or the National Death Index.<sup>14</sup> Death certificates, medical records, and autopsy reports were obtained to adjudicate cause of death and CVD outcomes.

### *Depressive symptoms*

The primary predictor was baseline depressive symptoms. The 4-item Center for Epidemiologic Studies Depression (CES-D) scale was used to assess the presence of depressive symptoms. This scale asks participants to rate the number of days over the last week in which they had: 1) felt depressed; 2) felt lonely; 3) had crying spells; and 4) felt sad. Response options included <1 day, 1 to 2 days, 3 to 4 days, and 5-7 days (0, 1, 2, 3 points, respectively). Cronbach's  $\alpha$  for the CES-D in the total sample was 0.80. Elevated depressive symptoms were defined as a summed score of  $\geq 4$ .<sup>15</sup> The reliability and validity of the CES-D 4 is similar to the original 20-item instrument.<sup>16</sup>

### *Covariates*

Demographic data included self-reported age, gender, race (black or white), education (less than high school, high school graduate, some college, and college graduate and above), annual income (less than \$20,000, \$20,000-\$34,999, \$35,000-\$74,999, \$75,000 and above), insurance

1 status (yes/no), and stroke region (including the 'stroke belt' and 'stroke buckle'). Clinical risk  
2  
3 factors included (1) diabetes defined as fasting blood glucose  $\geq 126$  or random glucose  $> 200$   
4  
5 mL/dL or oral hypoglycemic or insulin use, (2) systolic and diastolic blood pressures based on  
6  
7 the average of two standardized blood pressure measurements (in mm Hg) (3) body mass index  
8  
9 (BMI) based on measured height and weight (4) albumin-to-creatinine ratio (ACR)  
10  
11 (logarithmically-transformed), (5) high-density lipoprotein (HDL)-cholesterol, (6) total  
12  
13 cholesterol, (7) history of CVD: coronary heart disease (self-reported history of myocardial  
14  
15 infarction or coronary revascularization procedure or evidence of myocardial infarction on the  
16  
17 study electrocardiogram), self-reported stroke, peripheral vascular disease, or aneurysm, (8)  
18  
19 cognitive impairment on the 6-item screener of global cognitive function<sup>17,18</sup> (9) chronic lung  
20  
21 disease defined as use of beta-2 adrenergic agonists, leukotriene inhibitors, inhaled  
22  
23 corticosteroids, combination inhalers, or other pulmonary medications such as ipratropium,  
24  
25 cromolyn, aminophylline and theophylline. We also assessed self-reported (yes/no) aspirin,  
26  
27 antidepressant (serotonin and norepinephrine reuptake inhibitors, selective serotonin reuptake  
28  
29 inhibitors, tricyclic antidepressants), statin, and antihypertensive use. Behavioral risk factors  
30  
31 included (1) self-reported pack-years of cigarette smoking; (2) physical activity ("How many  
32  
33 times per week do you engage in intense physical activity, enough to work up a sweat?" with  
34  
35 response options of "none", "1-3 times per week" and "4 or more times per week"); (3) alcohol  
36  
37 use ("How many alcoholic beverages do you drink?": none, moderate [1 drink per day for  
38  
39 women or 2 drinks per day for men], and heavy [greater than 1 drink per day for women and 2  
40  
41 drinks per day for men]);<sup>14</sup> (4) medication non-adherence assessed with the 4-item Morisky  
42  
43 Medication Adherence Scale ( $\geq 1$ ).<sup>19</sup> Potential physiologic risk factors included high-sensitivity  
44  
45 C-reactive protein, self-reported health status based on the physical component of the 12-item  
46  
47 Short-Form Health Survey (SF 12),<sup>20</sup> and perceived stress, measured by the 4-item version of the  
48  
49  
50  
51  
52  
53  
54  
55  
56  
57  
58  
59  
60



1 Perceived Stress Scale (score of  $\geq 5$  vs.  $<5$ ).<sup>21</sup> Other than depressive symptoms, no other  
2  
3 covariate was assessed more than once.  
4  
5  
6  
7

### 8 *Statistical Analyses*

9

10 Baseline characteristics of participants with and without elevated depressive symptoms at  
11  
12 baseline were compared using chi-square tests (for categorical variables), Student t tests (for  
13  
14 continuous variables), and Wilcoxon rank sum tests (for non-normally distributed continuous  
15  
16 measures).  
17  
18  
19  
20

21 Cox proportional hazard regression models were constructed to separately analyze the  
22  
23 association between depressive symptoms ( $\text{CES-D} \geq 4$ ) and cancer death (from all body sites, a  
24  
25 subset of nonCVD death), CVD death, nonCVD death and all-cause death. The end date of  
26  
27 follow-up for this analysis was December 31, 2012. Depressive symptoms were measured on the  
28  
29 CES-D scale: 1) at baseline (initial telephone call), 2) on average five years after baseline  
30  
31 measurement, and 3) on average two years after the second measurement. In the analyses, we  
32  
33 considered depressive symptoms ( $\text{CES-D} \geq 4$  vs.  $<4$ ) as a time-varying exposure, with updates of  
34  
35 exposure at 5-year and 7-year follow-up. Therefore, each participant contributed up to 3  
36  
37 measures of CES-D ( $\geq 4$  vs.  $<4$ ) with a broken-up follow-up time. Follow-up time for each  
38  
39 participant was calculated from the date of the in-home visit to the date of the earliest of: death,  
40  
41 last telephone follow-up, end of follow-up or next CES-D measure. We additionally graphically  
42  
43 plotted unadjusted survival functions for participants with elevated vs. nonelevated depressive  
44  
45 symptoms using the Simon-Makuch method,<sup>22</sup> a modification of the Kaplan-Meier method. In  
46  
47 this context, depression status is treated as a binary time-dependent covariate and study cohorts  
48  
49 are continually updated to contribute to either the  $\text{CES-D} \geq 4$  or  $\text{CES-D} < 4$  groups.  
50  
51  
52  
53  
54  
55  
56  
57  
58  
59  
60

1  
2  
3 Unadjusted hazard ratios and 95% confidence intervals (CI) of mortality endpoints were  
4  
5 estimated for those with vs. without elevated depressive symptoms. Adjusted modeling  
6  
7 proceeded in stages (adjusting for baseline covariates), starting with demographic (Model 1) and  
8  
9 traditional CVD risk factors (Model 2) assessed in prior trials. We then added behavioral (Model  
10  
11 3) and other potential explanatory (Model 4) factors. We also ran an additional model (Model 5),  
12  
13 which considered intervening first non-fatal stroke and/or myocardial infarction as a time-  
14  
15 dependent covariate in CVD death outcomes. All analyses were conducted overall as well as  
16  
17 stratified. We also conducted a formal test for interaction between depressive symptoms and self-  
18  
19 reported health (defined as excellent or very good vs. good, fair or poor health) in model 4. As  
20  
21 such, all analyses were conducted overall as well as stratified by baseline self-reported health. To  
22  
23 evaluate the possibility of non-proportional hazards, we graphically inspected the log-log  
24  
25 survival plots for depressive symptoms. We tested the Schoenfeld residuals for each model for a  
26  
27 non-zero slope and all p values were greater than 0.05, indicating compatibility with the  
28  
29 proportional hazards assumption.  
30  
31  
32  
33  
34  
35  
36  
37  
38  
39

#### 40 *Sensitivity Analyses*

41  
42 Sensitivity analyses constructed in parallel to the main analyses examined association of baseline  
43  
44 CES-D measure with mortality endpoints in the sequentially-adjusted Cox proportional hazard  
45  
46 regression models. The end date of follow-up for this analysis was December 31, 2012. Follow-  
47  
48 up time for each participant was calculated from the date of the in-home visit to the date of the  
49  
50 earliest of: death, last telephone follow-up, or end of follow-up.  
51  
52  
53  
54  
55  
56  
57  
58  
59  
60

1 Missing data in covariates were imputed using chained equations and derived by bootstrapping  
2  
3 across the 5 imputed datasets. Multiple imputation was used for all analyses. Of the 29,491  
4  
5 participants, 2768 (9%) were missing income data, 59 (0.2%) health status, 9 (<0.1%) education,  
6  
7 26 (0.1%) health insurance, 1087 (4%) diabetes, 16 (0.1%) aspirin use, 70 (0.2%) statin use, 70  
8  
9 (0.2%) antidepressant use, 333 (1%) anti-hypertension meds use, 439 (2%) physical activity,  
10  
11 2705 (9%) medication adherence, 213 (0.7%) BMI, 1254 (4%) cholesterol, 1401 (5%) HDL, 912  
12  
13 (3.1%) pack years, 84 (0.3%) SBP, 1394 (5%) renal function, 381 (1%) QTc, 5681 (19.3%)  
14  
15 cognitive status, 4 (<0.1%) stress, 1425 (4%) SF-12 and 1881 (6%) CRP. Analyses were  
16  
17 conducted using SAS software version 9.4 (SAS Institute, Cary, NC) and STATA version 12  
18  
19 (STATA incorporated, College Station, TX).  
20  
21  
22  
23  
24  
25  
26

## 27 Results

### 28 *Participant Characteristics*

29  
30 Overall, 1.6% were lost to follow-up and 0.7% were missing baseline depressive symptoms,  
31  
32 leaving 29,491 eligible participants (**Figure 1**) of whom 3,254 (11.0%) had elevated depressive  
33  
34 symptoms at baseline (CES-D $\geq$ 4). The average age was 64.9 (9.4) years; 55.1% were female and  
35  
36 41.1% were black, 22.0% had diabetes, 9.2% chronic lung disease, and 23.1% CVD. Nearly 33%  
37  
38 of individuals were physically inactive, 29.2% non-adherent to their medication regimen and  
39  
40 14.5% current smokers. A total of 53.5% of participants self-reported their general health to be  
41  
42 poor, fair, or good compared to 46.5% who reported their health to be excellent or very good, of  
43  
44 whom 16.0% and 5.3% had elevated depressive symptoms, respectively (eTable 1). Regardless  
45  
46 of health status, participants with elevated (vs. non-elevated) depressive symptoms were more  
47  
48 likely to be female, African-American, low income, have more chronic diseases, low physical  
49  
50 health, and more behavioral risk factors (**Table 1A-B**).  
51  
52  
53  
54  
55  
56  
57  
58  
59  
60

**Table 1A. Overall baseline characteristics of REGARDS participants according to baseline depressive symptoms (CES-D)**

| Characteristics                                          | Overall<br>(n=29,491) | CES-D < 4<br>(n=26,817) | CES-D ≥4<br>(n=3,254) | <i>p</i> |
|----------------------------------------------------------|-----------------------|-------------------------|-----------------------|----------|
| <b><i>Socio-demographics</i></b>                         |                       |                         |                       |          |
| Age, <i>M</i> (SD)                                       | 64.9 (9.4)            | 65.1 (9.4)              | 63.2 (9.8)            | <.001    |
| Female, n (%)                                            | 16245 (55.1)          | 13988 (53.3)            | 2257 (69.4)           | <.001    |
| African American, n (%)                                  | 12129 (41.1)          | 10427 (39.7)            | 1702 (52.3)           | <.001    |
| Less than high school education, n (%)                   | 3696 (12.5)           | 2916 (11.1)             | 780 (24.0)            | <.001    |
| Annual household income, n (%)                           |                       |                         |                       |          |
| Less than \$20,000                                       | 5322 (18.0)           | 4148 (15.8)             | 1174 (36.1)           | <.001    |
| No health insurance, n (%)                               | 1926 (6.5)            | 1532 (5.8)              | 394 (12.1)            | <.001    |
| Region, n (%)                                            |                       |                         |                       | <.001    |
| Stroke belt <sup>a</sup>                                 | 10193 (34.6)          | 8973 (34.2)             | 1220 (37.5)           |          |
| Stroke buckle <sup>b</sup>                               | 6188 (21.0)           | 5437 (20.7)             | 751 (23.1)            |          |
| Non-stroke belt or buckle                                | 13110 (44.5)          | 11827 (45.1)            | 1283 (39.4)           |          |
| <b><i>General health and medical conditions</i></b>      |                       |                         |                       |          |
| Self-reported general health, n (%)                      |                       |                         |                       | <.001    |
| Poor, fair, good                                         | 15742 (53.5)          | 13219 (50.5)            | 2523 (77.7)           |          |
| Excellent, very good                                     | 13690 (46.5)          | 12965 (49.5)            | 725 (22.3)            |          |
| Cardiovascular disease, n (%) <sup>c</sup>               | 6825 (23.1)           | 5838 (22.3)             | 987 (30.3)            | <.001    |
| Diabetes, n (%) <sup>d</sup>                             | 6252 (22.0)           | 5305 (21.0)             | 947 (30.2)            | <.001    |
| COPD, n (%)                                              | 2710 (9.2)            | 2307 (8.8)              | 403 (12.4)            | <.001    |
| Physical component score on SF-12 scale, <i>M</i> (SD)   | 46.4 (10.6)           | 47.1 (10.2)             | 40.7 (12.2)           | <.001    |
| <b><i>Physiological risk factors</i></b>                 |                       |                         |                       |          |
| Body Mass Index, kg/m <sup>2</sup> , <i>M</i> (SD)       | 29.3 (6.2)            | 29.2 (6.1)              | 30.6 (7.1)            | <.001    |
| Systolic Blood Pressure, mmHg, <i>M</i> (SD)             | 127.6 (16.7)          | 127.5 (16.5)            | 128.7 (18.1)          | <.001    |
| Total Cholesterol, mg/dL, <i>M</i> (SD)                  | 192.1 (40.1)          | 191.7 (39.8)            | 194.6 (43.0)          | <0.001   |
| High-Density Lipoprotein, mg/dL, <i>M</i> (SD)           | 51.8 (16.2)           | 51.7 (16.2)             | 52.5 (16.3)           | 0.02     |
| QT Interval, corrected for heart rate, ms, <i>M</i> (SD) | 407.5 (23.6)          | 407.2 (23.5)            | 410.0 (24.1)          | <.001    |
| High-Sensitivity C-Reactive Protein, mg/L, median, IQR   | 2.2[1.0-5.0]          | 2.1[0.9-4.8]            | 3.0[1.2-6.9]          | <.001    |
| Albumin to Creatinine Ratio, mg/g, median, IQR           | 7.4[4.7-6.2]          | 7.3[4.6-15.8]           | 8.2[5.1-19.8]         | <.001    |
| <b><i>Medications</i></b>                                |                       |                         |                       |          |
| Antihypertensive medication use, n (%)                   | 15197 (52.1)          | 13290 (51.2)            | 1907 (59.4)           | <.001    |
| Statin use, n (%)                                        | 9295 (31.6)           | 8248 (31.5)             | 1047 (32.3)           | 0.38     |

|    |                                             |              |              |              |        |
|----|---------------------------------------------|--------------|--------------|--------------|--------|
| 1  | Aspirin use, n (%)                          | 12790 (43.4) | 11376 (43.4) | 1414 (43.5)  | 0.91   |
| 2  |                                             |              |              |              |        |
| 3  | Antidepressant use, n (%)                   | 4086 (13.9)  | 3164 (12.1)  | 922 (28.4)   | <.001  |
| 4  | <b>Behavioral risk factors</b>              |              |              |              |        |
| 5  | Self-reported smoking, pack years, <i>M</i> |              |              |              |        |
| 6  | (SD)                                        | 13.5 ( 23.1) | 13.3 ( 22.8) | 15.5 ( 24.9) | <.001  |
| 7  |                                             |              |              |              |        |
| 8  | Current Smoking, n(%)                       | 4263(14.5)   | 3463(13.3)   | 800(24.7)    | <.001  |
| 9  |                                             |              |              |              |        |
| 10 | Alcohol use, n (%)                          |              |              |              | <.001  |
| 11 | Heavy                                       | 1172 (4.1)   | 1043 (4.0)   | 129 (4.1)    |        |
| 12 | Moderate                                    | 9626 (33.3)  | 8786 (34.1)  | 840 (26.6)   |        |
| 13 | None                                        | 18116 (62.7) | 15925 (61.8) | 2191 (69.3)  |        |
| 14 | Physical inactivity, n (%)                  | 10004 (34.4) | 8500 (32.9)  | 1504 (46.9)  | <0.001 |
| 15 |                                             |              |              |              |        |
| 16 | Medication non-adherence, n (%)             | 7959 (29.7)  | 6820 (28.7)  | 1139 (37.8)  | <.001  |
| 17 |                                             |              |              |              |        |
| 18 | Impaired cognitive status                   | 1888 (7.9)   |              |              |        |
| 19 | (Cognitive score $\leq 4$ )                 |              | 1542 (7.3)   | 346 (12.6)   | <.001  |
| 20 | Elevated perceived stress (PSS $\geq 5$ )   | 8591 (29.1)  | 6283 (23.9)  | 2308 (70.9)  | <.001  |

*p* Values from chi square, Student *t* tests. CES-D = Centers for Epidemiology Studies – Depression scale. CVD = cardiovascular disease. IQR = interquartile range. *M* = mean. SD = standard deviation; PSS=Perceived stress scale; COPD=Chronic Obstructive Pulmonary Disease  
n= total number assuming no missing data

<sup>a</sup>Stroke Belt defined as the states of Alabama, Arkansas, Louisiana, Mississippi, Tennessee and the noncoastal regions within the states of North Carolina, South Carolina and Georgia.

<sup>b</sup>Stroke buckle defined as coastal regions within the states of North Carolina, South Carolina and Georgia.

<sup>c</sup>CVD defined as baseline coronary heart disease, stroke, periphery artery disease or aortic aneurism.

<sup>d</sup>Diabetes defined as fasting blood glucose  $\geq 126$  or random glucose  $>200$  mL/dL or oral hypoglycemic or insulin use.

**Table 1B. Baseline characteristics of REGARDS participants according to baseline depressive symptoms (CES-D) and self-reported health**

| Characteristics                                          | Self-reported general health as<br>"excellent or very good" |                     |          | Self-reported general health as<br>"poor, fair or good" |                      |          |
|----------------------------------------------------------|-------------------------------------------------------------|---------------------|----------|---------------------------------------------------------|----------------------|----------|
|                                                          | CES-D < 4<br>(n=12965)                                      | CES-D ≥4<br>(n=725) | <i>p</i> | CES-D < 4<br>(n=13219)                                  | CES-D ≥4<br>(n=2523) | <i>p</i> |
| <b>Socio-demographics</b>                                |                                                             |                     |          |                                                         |                      |          |
| Age, <i>M</i> (SD)                                       | 64.8 (9.4)                                                  | 64.5 (10.2)         | 0.47     | 65.5 (9.3)                                              | 62.8 (9.6)           | <.001    |
| Female, n (%)                                            | 6600 (50.9)                                                 | 501 (69.1)          | <.001    | 7357 (55.7)                                             | 1751 (69.4)          | <.001    |
| African American, n (%)                                  | 3726 (28.7)                                                 | 295 (40.7)          | <.001    | 6677 (50.5)                                             | 1404 (55.6)          | <.001    |
| Less than high school education, n (%)                   | 845 (6.5)                                                   | 119 (16.4)          | <.001    | 2059 (15.6)                                             | 658 (26.1)           | <.001    |
| Annual household income, n (%)                           |                                                             |                     |          |                                                         |                      |          |
| Less than \$20,000                                       | 1304 (10.1)                                                 | 190 (26.2)          | <.001    | 2832 (21.4)                                             | 983 (39.0)           | <.001    |
| No health insurance, n (%)                               | 644 (5.0)                                                   | 70 (9.7)            | <.001    | 884 (6.7)                                               | 324 (12.9)           | <.001    |
| Region, n (%)                                            |                                                             |                     | 0.37     |                                                         |                      | <.001    |
| Stroke belt <sup>a</sup>                                 | 4282 (33.0)                                                 | 256 (35.3)          |          | 4668 (35.3)                                             | 963 (38.2)           |          |
| Stroke buckle <sup>b</sup>                               | 2619 (20.2)                                                 | 148 (20.4)          |          | 2807 (21.2)                                             | 601 (23.8)           |          |
| Non-stroke belt or buckle                                | 6064 (46.8)                                                 | 321 (44.3)          |          | 5744 (43.5)                                             | 959 (38.0)           |          |
| <b>General health and medical conditions</b>             |                                                             |                     |          |                                                         |                      |          |
| Self-reported general health, n (%)                      |                                                             |                     |          |                                                         |                      |          |
| Poor, fair, good                                         | --                                                          | --                  |          | ---                                                     | --                   |          |
| Excellent, very good                                     | --                                                          | --                  |          | ---                                                     | ---                  |          |
| Cardiovascular disease, n (%) <sup>c</sup>               | 1948 (15.0)                                                 | 144 (19.9)          | 0.004    | 3874 (29.3)                                             | 840 (33.3)           | <.001    |
| Diabetes, n (%) <sup>d</sup>                             | 1443 (11.6)                                                 | 93 (13.3)           | 0.16     | 3840 (30.2)                                             | 853 (35.1)           | <.001    |
| COPD, n (%)                                              | 796 (6.2)                                                   | 55 (7.6)            | 0.11     | 1507 (11.4)                                             | 347 (13.8)           | 0.007    |
| Physical component score on SF-12 scale, <i>M</i> (SD)   | 52.0 (6.5)                                                  | 51.3 (9.1)          | 0.008    | 42.0 (10.7)                                             | 37.7 (11.3)          | <.001    |
| <b>Physiological risk factors</b>                        |                                                             |                     |          |                                                         |                      |          |
| Body Mass Index, kg/m <sup>2</sup> , <i>M</i> (SD)       | 27.8 (5.1)                                                  | 28.4 (5.7)          | 0.006    | 30.5 (6.6)                                              | 31.2 (7.3)           | <.001    |
| Systolic Blood Pressure, mmHg, <i>M</i> (SD)             | 125.3 (15.7)                                                | 126.0 (17.2)        | 0.27     | 129.6 (16.9)                                            | 129.5 (18.3)         | 0.91     |
| Total Cholesterol, mg/dL, <i>M</i> (SD)                  | 193.8 (38.2)                                                | 195.5 (38.6)        | 0.26     | 189.7 (41.2)                                            | 194.4 (44.2)         | <.001    |
| High-Density Lipoprotein, mg/dL, <i>M</i> (SD)           | 53.1 (16.4)                                                 | 55.8 (16.6)         | <.001    | 50.4 (15.8)                                             | 51.5 (16.1)          | 0.002    |
| QT Interval, corrected for heart rate, ms, <i>M</i> (SD) | 405.6 (22.6)                                                | 407.2 (23.5)        | 0.06     | 408.7 (24.3)                                            | 410.8 (24.2)         | <0.001   |
| High-Sensitivity C-Reactive Protein, mg/L, median, IQR   | 1.7[0.8-3.8]                                                | 1.9[0.9-4.9]        | 0.004    | 2.7[1.2-6.1]                                            | 3.4[1.3-7.7]         | <.001    |
| Albumin to Creatinine Ratio, mg/g, median, IQR           | 6.6[4.3-12.3]                                               | 6.9[4.7-14.0]       | 0.005    | 8.4[5.0-20.7]                                           | 8.7[5.1-22.2]        | 0.18     |
|                                                          | 4916 (38.3)                                                 | 297 (41.7)          | 0.06     | 8344 (63.9)                                             | 1606 (64.5)          | 0.57     |

**Medications**

|                                                      |              |              |       |              |              |       |
|------------------------------------------------------|--------------|--------------|-------|--------------|--------------|-------|
| Antihypertensive medication use, n (%)               |              |              |       |              |              |       |
| Statin use, n (%)                                    | 3407 (26.4)  | 176 (24.4)   | 0.24  | 4822 (36.5)  | 870 (34.6)   | 0.06  |
| Aspirin use, n (%)                                   | 5254 (40.5)  | 273 (37.7)   | 0.13  | 6100 (46.2)  | 1140 (45.2)  | 0.36  |
|                                                      |              |              |       |              |              | <.001 |
| Antidepressant use, n (%)                            | 1224 (9.5)   | 144 (19.9)   | <.001 | 1933 (14.6)  | 774 (30.8)   |       |
| <b>Behavioral risk factors</b>                       |              |              |       |              |              |       |
| Self-reported smoking, pack years, <i>M</i> (SD)     | 11.2 ( 20.5) | 12.1 ( 21.6) | 0.24  | 15.3 ( 24.7) | 16.5 ( 25.6) | 0.03  |
| Current Smoking, n(%)                                | 1344 (10.4)  | 114 (15.8)   | <.001 | 2110 (16.0)  | 684 (27.2)   | <.001 |
| Alcohol use, n (%)                                   |              |              | 0.01  |              |              | <.001 |
| Heavy                                                | 634 (5.0)    | 38 (5.4)     |       | 409 (3.2)    | 91 (3.7)     |       |
| Moderate                                             | 5034 (39.4)  | 238 (33.8)   |       | 3746 (29.0)  | 600 (24.5)   |       |
| None                                                 | 7103 (55.6)  | 429 (60.9)   |       | 8779 (67.9)  | 1758 (71.8)  |       |
| Physical inactivity, n (%)                           | 3107 (24.3)  | 259 (36.0)   | <.001 | 5372 (41.3)  | 1242 (50.0)  | <.001 |
| Medication non-adherence, n (%)                      | 2997 (26.2)  | 211 (33.1)   | <.001 | 3809 (31.0)  | 926 (39.1)   | <.001 |
| Impaired cognitive status (Cognitive score $\leq$ 4) | 587 (5.6)    | 61 (10.1)    | <.001 | 947 (8.9)    | 285 (13.3)   | <.001 |
| Elevated perceived stress (PSS $\geq$ 5)             | 2219 (17.1)  | 404 (55.7)   | <.001 | 4048 (30.6)  | 1900 (75.3)  | <.001 |

*p* Values from chi square, Student *t* tests. CES-D = Centers for Epidemiology Studies – Depression scale.

CVD = cardiovascular disease. IQR = interquartile range. *M* = mean. SD = standard deviation;

PSS=Perceived stress scale; COPD=Chronic Obstructive Pulmonary Disease

n= total number assuming no missing data

<sup>a</sup>Stroke Belt defined as the states of Alabama, Arkansas, Louisiana, Mississippi, Tennessee and the noncoastal regions within the states of North Carolina, South Carolina and Georgia.

<sup>b</sup>Stroke buckle defined as coastal regions within the states of North Carolina, South Carolina and Georgia.

<sup>c</sup> CVD defined as baseline coronary heart disease, stroke, periphery artery disease or aortic aneurism.

<sup>d</sup>Diabetes defined as fasting blood glucose  $\geq$ 126 or random glucose >200 mL/dL or oral hypoglycemic or insulin use.

**Mortality**

A total of 4,581 (15.5%) participants died during the follow-up period ending in 2012. Of these, 1,551 (33.9%) were attributed to CVD and 3,030 (66.1%) to nonCVD disease death. Of nonCVD deaths, 1,226 (44.3%) were due to cancer death (eTable 2). Overall, there were only 3 cases of mortality due to suicide.

For the time-varying analyses, depressive symptoms were measured at baseline and on average 4.8 years (SD = 1.5) years following the baseline measurement, the third measurement occurring on average 2.1 (SD = 0.4) years after the second measurement (eFigure 1). The mean follow-up time

1 of the second and third measurement of CES-D measures did not differ by self-reported health  
2  
3 (eFigure 2). Of the participants with elevated depressive symptoms at baseline, 39.9% and 36.8%  
4  
5 had elevated depressive symptoms at the second and third measures, respectively (eTable 3). Time-  
6  
7 varying depressive symptoms significantly predicted nonCVD disease death (aHR 1.29, 95% CI  
8  
9 1.16-1.44) and all-cause mortality (aHR 1.24, 95% CI 1.14-1.36), while approaching significance  
10  
11 for cancer death (aHR 1.15, 95% CI 0.96-1.38) and CVD death (aHR 1.13, 95% CI 0.98-1.32),  
12  
13 even after adjusting for demographic, clinical, behavioral physiologic factors and time-varying non-  
14  
15 fatal CVD events (**Table 2**, eFigure 3). The results appeared to be particularly robust amongst those  
16  
17 with excellent or very good self-reported general health: all-cause (aHR=1.48, 95%CI 1.27-1.78),  
18  
19 CVD (aHR=1.37, 95%CI 0.99-1.91), nonCVD (aHR=1.54, 95%CI 1.24-1.92) and cancer  
20  
21 (aHR=1.36 95% 0.97-1.91) death. In Model 4, the p-values for the depressive symptoms x health  
22  
23 status interaction term were 0.005 (all-cause mortality), 0.06 (CVD death), 0.03 (nonCVD death),  
24  
25 and 0.20 (cancer death). Results were similar without multiple imputations within 2 decimal places  
26  
27  
28  
29  
30  
31 (**Table 2**).



**Table 2. Association of elevated depressive symptoms with mortality outcomes.** Each participant contributes to up to 3 time-variant CES-D measures. End of follow-up December 31, 2012.

|                                                                                                                                                                                                                                                                                                                                                                                                                                                                     | Overall (N=29,491)                              | Self-reported general health as "excellent or very good" n=13,711 | Self-reported general health as "poor, fair or good" n=15,780 |
|---------------------------------------------------------------------------------------------------------------------------------------------------------------------------------------------------------------------------------------------------------------------------------------------------------------------------------------------------------------------------------------------------------------------------------------------------------------------|-------------------------------------------------|-------------------------------------------------------------------|---------------------------------------------------------------|
| <b>HR (95%CI) for categorical CES-D (Score =&gt;4 v. &lt; 4)</b>                                                                                                                                                                                                                                                                                                                                                                                                    |                                                 |                                                                   |                                                               |
| <b>All-cause mortality</b>                                                                                                                                                                                                                                                                                                                                                                                                                                          |                                                 |                                                                   |                                                               |
| Events, n                                                                                                                                                                                                                                                                                                                                                                                                                                                           | 4581                                            | 1392                                                              | 3189                                                          |
| Crude                                                                                                                                                                                                                                                                                                                                                                                                                                                               | <b>1.66(1.54-1.80)</b>                          | <b>1.97(1.66-2.33)</b>                                            | <b>1.30(1.19-1.42)</b>                                        |
| Model 1 <sup>a</sup>                                                                                                                                                                                                                                                                                                                                                                                                                                                | <b>1.63(1.50-1.76)</b>                          | <b>1.74(1.46-2.07)</b>                                            | <b>1.42(1.29-1.55)</b>                                        |
| Model 2 <sup>b</sup>                                                                                                                                                                                                                                                                                                                                                                                                                                                | <b>1.42(1.31-1.54)</b>                          | <b>1.60(1.34-1.90)</b>                                            | <b>1.30(1.19-1.43)</b>                                        |
| Model 3 <sup>c</sup>                                                                                                                                                                                                                                                                                                                                                                                                                                                | <b>1.38(1.27-1.49)</b>                          | <b>1.57(1.32-1.87)</b>                                            | <b>1.27(1.16-1.39)</b>                                        |
| Model 4 <sup>d</sup>                                                                                                                                                                                                                                                                                                                                                                                                                                                | <b>1.24(1.13-1.35)</b>                          | <b>1.53(1.27-1.83)</b>                                            | <b>1.16(1.05-1.28)</b>                                        |
| Model 5 <sup>e</sup>                                                                                                                                                                                                                                                                                                                                                                                                                                                | <b>1.24(1.14-1.36)</b>                          | <b>1.48(1.27-1.78)</b>                                            | <b>1.17(1.06-1.30)</b>                                        |
| Model 4 + CES-D x self-reported health                                                                                                                                                                                                                                                                                                                                                                                                                              | p-value for the interaction term - <b>0.005</b> |                                                                   |                                                               |
| <b>CVD Death</b>                                                                                                                                                                                                                                                                                                                                                                                                                                                    |                                                 |                                                                   |                                                               |
| Events, n                                                                                                                                                                                                                                                                                                                                                                                                                                                           | 1551                                            | 437                                                               | 1114                                                          |
| Crude                                                                                                                                                                                                                                                                                                                                                                                                                                                               | <b>1.61(1.41-1.85)</b>                          | <b>2.01(1.49-2.72)</b>                                            | <b>1.23(1.05-1.43)</b>                                        |
| Model 1 <sup>a</sup>                                                                                                                                                                                                                                                                                                                                                                                                                                                | <b>1.58(1.37-1.81)</b>                          | <b>1.76(1.29-2.40)</b>                                            | <b>1.35(1.15-1.58)</b>                                        |
| Model 2 <sup>b</sup>                                                                                                                                                                                                                                                                                                                                                                                                                                                | <b>1.31(1.13-1.51)</b>                          | <b>1.52(1.12-2.08)</b>                                            | <b>1.20(1.03-1.41)</b>                                        |
| Model 3 <sup>c</sup>                                                                                                                                                                                                                                                                                                                                                                                                                                                | <b>1.27(1.10-1.46)</b>                          | <b>1.53(1.12-2.09)</b>                                            | 1.17(1.00-1.37)                                               |
| Model 4 <sup>d</sup>                                                                                                                                                                                                                                                                                                                                                                                                                                                | 1.15(0.98-1.33)                                 | <b>1.47(1.07-2.04)</b>                                            | 1.06(0.90-1.26)                                               |
| Model 5 <sup>e</sup>                                                                                                                                                                                                                                                                                                                                                                                                                                                | 1.13(0.98-1.32)                                 | 1.37(0.99-1.91) p=0.06                                            | 1.07(0.90-1.27)                                               |
| Model 4 + CES-D x self-reported health                                                                                                                                                                                                                                                                                                                                                                                                                              | p-value for the interaction term - <b>0.06</b>  |                                                                   |                                                               |
| <b>NonCVD Death</b>                                                                                                                                                                                                                                                                                                                                                                                                                                                 |                                                 |                                                                   |                                                               |
| Events, n                                                                                                                                                                                                                                                                                                                                                                                                                                                           | 3030                                            | 955                                                               | 2075                                                          |
| Crude                                                                                                                                                                                                                                                                                                                                                                                                                                                               | <b>1.69(1.53-1.86)</b>                          | <b>1.95(1.58-2.39)</b>                                            | <b>1.34(1.20-1.50)</b>                                        |
| Model 1 <sup>a</sup>                                                                                                                                                                                                                                                                                                                                                                                                                                                | <b>1.65(1.50-1.83)</b>                          | <b>1.73(1.40-2.14)</b>                                            | <b>1.45(1.30-1.63)</b>                                        |
| Model 2 <sup>b</sup>                                                                                                                                                                                                                                                                                                                                                                                                                                                | <b>1.48(1.34-1.64)</b>                          | <b>1.63(1.32-2.02)</b>                                            | <b>1.35(1.23-1.51)</b>                                        |
| Model 3 <sup>c</sup>                                                                                                                                                                                                                                                                                                                                                                                                                                                | <b>1.44(1.30-1.59)</b>                          | <b>1.59(1.29-1.97)</b>                                            | <b>1.33(1.18-1.49)</b>                                        |
| Model 4 <sup>d</sup>                                                                                                                                                                                                                                                                                                                                                                                                                                                | <b>1.30(1.17-1.48)</b>                          | <b>1.58(1.27-2.24)</b>                                            | <b>1.22(1.08-1.38)</b>                                        |
| Model 5 <sup>e</sup>                                                                                                                                                                                                                                                                                                                                                                                                                                                | <b>1.29(1.16-1.44)</b>                          | <b>1.54(1.24-1.92)</b>                                            | <b>1.22(1.08-1.38)</b>                                        |
| Model 4 + CES-D x self-reported health                                                                                                                                                                                                                                                                                                                                                                                                                              | p-value for the interaction term - <b>0.03</b>  |                                                                   |                                                               |
| <b>Cancer Death (a subset of nonCVD death)</b>                                                                                                                                                                                                                                                                                                                                                                                                                      |                                                 |                                                                   |                                                               |
| Events, n                                                                                                                                                                                                                                                                                                                                                                                                                                                           | 1226                                            | 475                                                               | 751                                                           |
| Crude                                                                                                                                                                                                                                                                                                                                                                                                                                                               | <b>1.27(1.09-1.53)</b>                          | <b>1.53(1.11-2.12)</b>                                            | 1.06(0.87-1.29)                                               |
| Model 1 <sup>a</sup>                                                                                                                                                                                                                                                                                                                                                                                                                                                | <b>1.29(1.09-1.53)</b>                          | <b>1.45(1.04-2.01)</b>                                            | 1.16(0.95-1.42)                                               |
| Model 2 <sup>b</sup>                                                                                                                                                                                                                                                                                                                                                                                                                                                | <b>1.25(1.05-1.48)</b>                          | <b>1.40(1.01-1.95)</b>                                            | 1.14(0.93-1.40)                                               |
| Model 3 <sup>c</sup>                                                                                                                                                                                                                                                                                                                                                                                                                                                | <b>1.20(1.01-1.43)</b>                          | 1.35(0.97-1.88)                                                   | 1.11(0.91-1.36)                                               |
| Model 4 <sup>d</sup>                                                                                                                                                                                                                                                                                                                                                                                                                                                | 1.16(0.96-1.39)                                 | 1.37(0.97-1.92)                                                   | 1.08(0.87-1.33)                                               |
| Model 5 <sup>e</sup>                                                                                                                                                                                                                                                                                                                                                                                                                                                | 1.15(0.96-1.38)                                 | 1.36(0.97-1.91)                                                   | 1.08(0.90-1.34)                                               |
| Model 4 + CES-D x self-reported health                                                                                                                                                                                                                                                                                                                                                                                                                              | p-value for the interaction term - 0.20         |                                                                   |                                                               |
| <sup>a</sup> Model 1 adjusts for <i>socio-demographics</i> (age, gender, region, income, health insurance, education)                                                                                                                                                                                                                                                                                                                                               |                                                 |                                                                   |                                                               |
| <sup>b</sup> Model 2 adds to model 1 <i>medical conditions, physiological factors and medication use</i> (systolic blood pressure, total cholesterol, high density lipoprotein-cholesterol, use of aspirin, statins, antihypertensives, antidepressants, body mass index, logarithmically transformed Albumin to Creatinine Ratio; diabetes, cardiovascular disease, medication use as a proxy for chronic obstructive pulmonary disease, and cognitive impairment) |                                                 |                                                                   |                                                               |
| <sup>c</sup> Model 3 adds to model 2 <i>behavioral risk factors</i> (pack-years of cigarette smoking, self-reported alcohol use, physical inactivity, medication non-adherence).                                                                                                                                                                                                                                                                                    |                                                 |                                                                   |                                                               |

---

<sup>d</sup>Model 4 adds to model 3 *other factors* (physical health component score of SF-12, log-transformed high sensitivity C-reactive protein and perceived stress)

<sup>e</sup>Model 5 adds non-fatal CVD event – first nonfatal myocardial infarction or stroke since baseline.

HR = hazard ratio; CVD cardiovascular disease; CES-D = Centers for Epidemiology Studies-Depression

**Bold p-value < 0.05**; Missing data in covariates imputed using chained equations.

---

### *Sensitivity Analyses:*

The mean follow-up time was 6.5 (SD = 2.3) years, with a median [interquartile range] of 6.9 [5.4-8.3] years. Baseline depressive symptoms were significantly associated with all-cause mortality (aHR 1.18, 95%CI 1.07-1.29) and nonCVD death (aHR 1.21, 95%CI 1.08-1.36) and approached significance for CVD death (aHR 1.10, 95%CI 0.94-1.29) and cancer death (aHR 1.12, 95%CI 0.93-1.36), even in the exploratory models (Model 3). The results appeared to be particularly robust amongst those with excellent or very good health: cancer death (aHR 1.49, 95%CI 1.03-2.13), CVD death (aHR 1.63, 95%CI 1.16-2.30), nonCVD death (aHR 1.48, 95%CI 1.15-1.89) and all-cause mortality (aHR 1.53, 95% CI 1.25-1.88). In Model 4, the p values for depressive symptoms x health status interaction term was 0.003 (all-cause mortality), 0.01 (CVD death), 0.06 (nonCVD death), and 0.07 (cancer death). Results were similar without multiple imputations within 2 decimal places (**Table 3**).

**Table 3. Association of baseline only elevated depressive symptoms (CES-D $\geq$ 4) with mortality outcomes. Each participant contributes 1 measure of CES-D at baseline.**

|                                                    | Overall<br>n=29,491    | Self-reported general<br>health as "excellent or<br>very good"<br>n=13,711 | Self-reported general health<br>as "poor, fair or good"<br>n=15,780 |
|----------------------------------------------------|------------------------|----------------------------------------------------------------------------|---------------------------------------------------------------------|
|                                                    | HR (95%CI)             | HR (95%CI)                                                                 | HR (95%CI)                                                          |
| All-cause mortality                                | 4581                   | 1392                                                                       | 3189                                                                |
| Crude                                              | <b>1.54(1.42-1.68)</b> | <b>1.91(1.59-2.31)</b>                                                     | <b>1.18(1.07-1.30)</b>                                              |
| Model 1 <sup>a</sup>                               | <b>1.57(1.44-1.72)</b> | <b>1.76(1.45-2.12)</b>                                                     | <b>1.34(1.21-1.47)</b>                                              |
| Model 2 <sup>b</sup>                               | <b>1.32(1.25-1.49)</b> | <b>1.61(1.33-1.96)</b>                                                     | <b>1.22(1.11-1.35)</b>                                              |
| Model 3 <sup>c</sup>                               | <b>1.32(1.27-1.44)</b> | <b>1.56(1.29-1.90)</b>                                                     | <b>1.20(1.09-1.32)</b>                                              |
| Model 4 <sup>d</sup>                               | <b>1.18(1.07-1.29)</b> | <b>1.53(1.25-1.88)</b>                                                     | 1.09(0.98-1.20)                                                     |
| Model 4 + baseline CES-D<br>x self-reported health |                        |                                                                            | p-value for the interaction term - <b>0.002</b>                     |
| CVD Death                                          | 1551                   | 437                                                                        | 1114                                                                |
| Crude                                              | <b>1.55(1.34-1.78)</b> | <b>2.16(1.58-2.96)</b>                                                     | <b>1.13(0.97-1.33)</b>                                              |
| Model 1 <sup>a</sup>                               | <b>1.57(1.35-1.81)</b> | <b>1.96(1.42-2.71)</b>                                                     | <b>1.29(1.10-1.52)</b>                                              |
| Model 2 <sup>b</sup>                               | <b>1.28(1.10-1.48)</b> | <b>1.71(1.23-2.38)</b>                                                     | 1.14(0.97-1.34)                                                     |
| Model 3 <sup>c</sup>                               | <b>1.24(1.07-1.44)</b> | <b>1.70(1.22-2.36)</b>                                                     | 1.11(0.94-1.31)                                                     |
| Model 4 <sup>d</sup>                               | 1.10(0.94-1.29)        | <b>1.63(1.16-2.30)</b>                                                     | 1.00(0.84-1.20)                                                     |
| Model 4 + baseline CES-D<br>x self-reported health |                        |                                                                            | p-value for the interaction term - <b>0.01</b>                      |
| NonCVD Death                                       | 3030                   | 955                                                                        | 2075                                                                |
| Crude                                              | <b>1.54(1.39-1.71)</b> | <b>1.80(1.42-2.26)</b>                                                     | <b>1.21(1.08-1.35)</b>                                              |
| Model 1 <sup>a</sup>                               | <b>1.57(1.42-1.75)</b> | <b>1.66(1.31-2.10)</b>                                                     | <b>1.36(1.21-1.53)</b>                                              |
| Model 2 <sup>b</sup>                               | <b>1.41(1.26-1.56)</b> | <b>1.56(1.29-1.98)</b>                                                     | <b>1.27(1.13-1.43)</b>                                              |
| Model 3 <sup>c</sup>                               | <b>1.36(1.22-1.51)</b> | <b>1.49(1.17-1.90)</b>                                                     | <b>1.25(1.11-1.41)</b>                                              |
| Model 4 <sup>d</sup>                               | <b>1.21(1.08-1.36)</b> | <b>1.48(1.15-1.89)</b>                                                     | <b>1.14(1.00-1.29)</b>                                              |
| Model 4 + baseline CES-D<br>x self-reported health |                        |                                                                            | p-value for the interaction term - <b>0.06</b>                      |
| Cancer Death (a subset of<br>nonCVD death)         | 1226                   | 475                                                                        | 751                                                                 |
| Crude                                              | <b>1.21(1.02-1.44)</b> | <b>1.63(1.16-2.30)</b>                                                     | 0.97(0.79-1.19)                                                     |
| Model 1 <sup>a</sup>                               | <b>1.27(1.06-1.52)</b> | <b>1.58(1.12-2.23)</b>                                                     | 1.09(0.89-1.35)                                                     |
| Model 2 <sup>b</sup>                               | <b>1.22(1.02-1.47)</b> | <b>1.53(1.08-2.17)</b>                                                     | 1.07(0.87-1.33)                                                     |
| Model 3 <sup>c</sup>                               | 1.17(0.98-1.41)        | <b>1.45(1.02-2.05)</b>                                                     | 1.05(0.85-1.30)                                                     |
| Model 4 <sup>d</sup>                               | 1.12(0.93-1.36)        | <b>1.49(1.03-2.13)</b>                                                     | 1.01(0.81-1.27)                                                     |
| Model 4 + baseline CES-D<br>x self-reported health |                        |                                                                            | p-value for the interaction term - <b>0.07</b>                      |

<sup>a</sup>Model 1 adjusts for *socio-demographics* (age, gender, region, income, health insurance, education)  
<sup>b</sup>Model 2 adds to model 1 *medical conditions, physiological factors and medication use* (systolic blood pressure, total cholesterol, high density lipoprotein-cholesterol, use of aspirin, statins, antihypertensives, antidepressants, body mass index, logarithmically transformed Albumin to Creatinine Ratio; diabetes, cardiovascular disease, medication use as a proxy for chronic obstructive pulmonary disease, and cognitive impairment)  
<sup>c</sup>Model 3 adds to model 2 *behavioral risk factors* (pack-years of cigarette smoking, self-reported alcohol use, physical inactivity, medication non-adherence).  
<sup>d</sup>Model 4 adds to model 3 *other factors* (physical health component score of SF-12, log-transformed high sensitivity C-reactive protein and perceived stress)  
HR = hazard ratio; CVD cardiovascular disease; CES-D = Centers for Epidemiology Studies-Depression  
HR and 95% CI were estimated by Cox proportional hazard regression models. Bold p-value < 0.05; Missing data in covariates imputed using chained equations.

## Discussion

To our knowledge, this is the largest study to date to examine the relationship between depressive symptoms and all-cause and cause-specific mortality in non-institutionalized middle to older aged adults using multiple measurements of depressive symptoms and examining the role of health status. In this diverse cohort, we found that time-varying depressive symptoms significantly increased the risk of nonCVD and all-cause mortality in fully adjusted models. In fully adjusted models, depressive symptoms increased the risk of cause-specific and all-cause mortality by 36% to 54% in those with a very good/excellent state of health.

Given that depression is a relapsing/remitting disease,<sup>23</sup> this study markedly adds to the literature by demonstrating a time-varying relationship between elevated depressive symptoms and mortality, including cancer death. Major study strengths include the use of 3 measurements of depressive symptoms and stringent physician adjudication of outcomes. We were, however, unable to adjust for other time-varying covariates, which should be addressed in future research. For example, prior research suggests that changes in physical health (e.g., number of debilitating conditions) over time may mediate the relationship between depressive symptoms and mortality.<sup>24</sup>

We are also the first to report a significant moderating effect of self-reported health on the relationship between depressive symptoms and mortality. Many have long asked whether depression leads to mortality or whether individuals are depressed because they are dying. Our findings in those who report excellent states of health is striking and supports the former argument.

1 It may also be that the effect of chronic illness burden on mortality in those with poor health  
2 overwhelms the effects of depressive symptoms. Those with excellent health may also fail to  
3 recognize/present for depression. In fact, depressed excellent health individuals in our cohort were  
4 less likely to be on an antidepressant. Nonetheless, this finding should be further explored in future  
5 studies.  
6  
7  
8  
9  
10  
11  
12  
13

14 The overall results also have a coherence consistent with prior studies that suggest that depressive  
15 symptoms don't solely predict suicide and CVD mortality, but also predict other causes such as  
16 cancer death.<sup>25</sup> While prior literature suggests that depressive symptoms confer mortality in those  
17 with active cancer,<sup>26</sup> our study excluded active cancer diagnoses confirming a possible relationship  
18 between depressive symptoms and incident cancer mortality. Prior studies have also been limited by  
19 inadequate covariate control, and our results for cancer persisted after adjusting for numerous  
20 traditional and behavioral risk factors, such as smoking, and approached significance even in  
21 models that included physiologic factors.  
22  
23  
24  
25  
26  
27  
28  
29  
30  
31  
32  
33  
34

35 Overall, baseline and time varying analyses were similar. However, while our baseline analyses  
36 suggest that depressive symptoms significantly contribute to cancer death in those with  
37 excellent/very good health, time varying analyses allowed for more accurate analyses in line with  
38 expectations, suggesting a weaker interaction by health status for proximal cancer mortality in this  
39 cohort that excluded those with active malignancy.  
40  
41  
42  
43  
44  
45  
46  
47  
48

49 This study also supports comprehensive evidence-based depression care management in primary  
50 care practices, which have been shown to lower mortality risk.<sup>27</sup> Nonetheless, depression treatment  
51 remains suboptimal in the general population,<sup>28</sup> despite decades of efforts. We too demonstrate that  
52  
53  
54  
55  
56  
57  
58  
59  
60

1 over time, nearly 40% of patients with elevated depressive symptoms at baseline were still  
2 depressed on average 5 and 7 years later. Given the potentially shorter follow-up times in both  
3 time-varying analyses (by virtue of follow-up times being broken up by repeat depression  
4 measures) and baseline analyses (with 6.5 years of follow-up on average), these findings lend  
5 greater urgency to the importance of timely and effective treatment of depressive symptoms to  
6 prevent adverse consequences of depressive symptoms on physical health and mortality.  
7  
8  
9  
10  
11  
12  
13  
14

15  
16 Limitations of our study include the regional specificity, limiting generalizability, and use of the  
17 short form of the CES-D, which measures only emotional and not somatic symptoms of depression.  
18 Schultz (2002) demonstrated variance between studies using scales and interviews,<sup>29</sup> and others  
19 have posited even stronger findings in studies with clinical diagnoses (vs. continuous measures).<sup>30</sup>  
20 However, CES-D scales are one of the most widely used scales in clinical practice and in baseline  
21 depression to outcome studies and have good sensitivity and specificity.<sup>9,15,16</sup> We may also have  
22 been underpowered to examine CVD and cancer mortality, though the directionality of the  
23 estimates remained consistent. The exclusion of active cancer participants as part of the overall  
24 REGARDS study criteria, the rationale of which has previously been described,<sup>14</sup> may also have  
25 contributed to lack of power. Those with a *history* of malignancy or CVD were not specifically  
26 excluded, which is in line with prior depression to mortality studies.<sup>1,9</sup> Nonetheless, our previously  
27 published study, which excluded those with a history of CVD, similarly found a strong relationship  
28 between time-varying depressive symptoms and CVD death.<sup>31</sup>  
29  
30  
31  
32  
33  
34  
35  
36  
37  
38  
39  
40  
41  
42  
43  
44  
45  
46  
47

48 We were also unable to adjust for other psychiatric comorbidities, such as anxiety (though we  
49 included stress) or account for subclinical CVD and/or cancer. In addition, the follow-up time (6.5  
50 years) was relatively short compared to other studies and we saw even shorter follow-up times  
51 between CES-D measures in time-varying analyses, suggesting a short-term effect on mortality.  
52  
53  
54  
55  
56  
57  
58  
59  
60

1 Our results support prior literature suggesting that shorter follow-up time is associated with greater  
2  
3 excess mortality.<sup>9,30</sup> However, we did not formally compare short-term to long-term follow-up nor  
4  
5 persistent to fluctuating depressive symptoms nor examine depression as a time-varying coefficient.  
6  
7

8  
9  
10 Given our results of a relationship between time-varying depressive symptoms and mortality,  
11  
12 further research is warranted to test the long-term efficacy of and adherence to depression treatment  
13  
14 and to explore preventive approaches to decreasing premature mortality risk.<sup>32</sup> To our knowledge,  
15  
16 the finding of a relationship between depressive symptoms and mortality in those with excellent or  
17  
18 very good self-reported health is a new finding and should be further studied.  
19  
20  
21  
22  
23  
24  
25  
26  
27  
28  
29  
30  
31  
32  
33  
34  
35  
36  
37  
38  
39  
40  
41  
42  
43  
44  
45  
46  
47  
48  
49  
50  
51  
52  
53  
54  
55  
56  
57  
58  
59  
60

## References

1. Wulsin LR, Vaillant GE, Wells VE. A systematic review of the mortality of depression. *Psychosom Med.* 1999;61:6-17.
2. Sullivan MD, O'Connor P, Feeney P, et al. Depression Predicts All-Cause Mortality: Epidemiological evaluation from the ACCORD HRQL substudy. *Diabetes Care.* 2012;35:1708-1715.
3. Review: depression after myocardial infarction is associated with increased risk of all-cause mortality and cardiovascular events. *Evidence Based Mental Health.* 2013;16:110.
4. Barth J, Schumacher M, Herrmann-Lingen C. Depression as a risk factor for mortality in patients with coronary heart disease: a meta-analysis. *Psychosom Med.* 2004;66:802-813.
5. Cuijpers P, Vogelzangs N, Twisk J, et al. Comprehensive meta-analysis of excess mortality in depression in the general community versus patients with specific illnesses. *Am J Psychiatry.* 2014;171:453-462.
6. Cuijpers P, Smit F. Excess mortality in depression: a meta-analysis of community studies. *J Affect Disord.* 72:227-236.
7. Bruce ML, Leaf PJ, Rozal GP, Florio L, Hoff RA. Psychiatric status and 9-year mortality data in the New Haven Epidemiologic Catchment Area Study. *Am J Psychiatry.* 1994;151:716-721.
8. Surtees PG, Wainwright NW, Luben RN, et al. Depression and ischemic heart disease mortality: evidence from the EPIC-Norfolk United Kingdom prospective cohort study. *Am J Psychiatry.* 2008;165:515-523.
9. Pinquart M, Duberstein PR. Depression and cancer mortality: a meta-analysis. *Psychological medicine.* 2010;40:1797-1810.



10. Mols F, Husson O, Roukema JA, van de Poll-Franse LV. Depressive symptoms are a risk factor for all-cause mortality: results from a prospective population-based study among 3,080 cancer survivors from the PROFILES registry. *J Cancer Surviv.* 2013;7:484-492.
11. Lasserre AM, Marti-Soler H, Strippoli MP, et al. Clinical and course characteristics of depression and all-cause mortality: A prospective population-based study. *J Affect Disord.* 2016;189:17-24.
12. McGee DL, Liao Y, Cao G, Cooper RS. Self-reported Health Status and Mortality in a Multiethnic US Cohort. *Am J Epidemiol.* 1999;149:41-46.
13. Ambresin G, Chondros P, Dowrick C, Herrman H, Gunn JM. Self-Rated Health and Long-Term Prognosis of Depression. *Annals of Family Medicine.* 2014;12:57-65.
14. Howard VJ, Cushman M, Pulley L, et al. The reasons for geographic and racial differences in stroke study: objectives and design. *Neuroepidemiology.* 2005;25:135-143.
15. Melchior LA, Huba GJ, Brown VB, Reback CJ. A Short Depression Index for Women. *Educational and Psychological Measurement.* 1993;53:1117-1125.
16. Radloff LS. The ces-d scale: A self-report depression scale for research in the general population. *Appl Psychol Meas.* 1977;1:385-401.
17. Folstein MF, Folstein SE, McHugh PR. "Mini-mental state". A practical method for grading the cognitive state of patients for the clinician. *J Psychiatr Res.* 1975;12:189-198.
18. Callahan CM, Unverzagt FW, Hui SL, Perkins AJ, Hendrie HC. Six-item screener to identify cognitive impairment among potential subjects for clinical research. *Med Care.* 2002;40:771-781.
19. Morisky DE, Green LW, Levine DM. Concurrent and predictive validity of a self-reported measure of medication adherence. *Med Care.* 1986;24:67-74.

- 1       **20.**   Ware J, Jr., Kosinski M, Keller SD. A 12-Item Short-Form Health Survey: construction of  
2       scales and preliminary tests of reliability and validity. *Med Care*. 1996;34:220-233.
- 3  
4  
5       **21.**   Cohen S, Kamarck T, Mermelstein R. A global measure of perceived stress. *J Health Soc*  
6       *Behav*. 1983;24:385-396.
- 7  
8  
9  
10       **22.**   Simon R, Makuch RW. A non-parametric graphical representation of the relationship  
11       between survival and the occurrence of an event: Application to responder versus non-  
12       responder bias. *Statistics in Medicine*. 1984;3:35-44.
- 13  
14  
15  
16       **23.**   Lin EH, Katon WJ, VonKorff M, et al. Relapse of depression in primary care. Rate and  
17       clinical predictors. *Arch Fam Med*. 1998;7:443-449.
- 18  
19  
20  
21       **24.**   Houle JN. Depressive symptoms and all-cause mortality in a nationally representative  
22       longitudinal study with time-varying covariates. *Psychosom Med*. 2013;75:297-304.
- 23  
24  
25  
26       **25.**   Mykletun A, Bjerkeset O, Dewey M, et al. Anxiety, depression, and cause-specific  
27       mortality: the HUNT study. *Psychosom Med*. 2007;69:323-331.
- 28  
29  
30  
31       **26.**   Satin JR, Linden W, Phillips MJ. Depression as a predictor of disease progression and  
32       mortality in cancer patients: a meta-analysis. *Cancer*. 2009;115:5349-5361.
- 33  
34  
35  
36       **27.**   Gallo JJ, Morales KH, Bogner HR, et al. Long term effect of depression care management  
37       on mortality in older adults: follow-up of cluster randomized clinical trial in primary care.  
38       *BMJ*. 2013;346:f2570.
- 39  
40  
41  
42       **28.**   González HM, Vega WA, Williams DR, et al. Depression care in the united states: Too little  
43       for too few. *Arch Gen Psychiatry*. 2010;67:37-46.
- 44  
45  
46  
47       **29.**   Schulz R, Drayer RA, Rollman BL. Depression as a risk factor for non-suicide mortality in  
48       the elderly. *Biol Psychiatry*. 2002;52:205-225.
- 49  
50  
51  
52       **30.**   Pan A, Sun Q, Okereke OI, Rexrode KM, Hu FB. Depression and risk of stroke morbidity  
53       and mortality: a meta-analysis and systematic review. *JAMA*. 2011;306:1241-1249.
- 54  
55  
56  
57  
58  
59  
60

- 1  
2  
3  
4  
5  
6  
7  
8  
9  
10  
11  
12  
13  
14  
15  
16  
17  
18  
19  
20  
21  
22  
23  
24  
25  
26  
27  
28  
29  
30  
31  
32  
33  
34  
35  
36  
37  
38  
39  
40  
41  
42  
43  
44  
45  
46  
47  
48  
49  
50  
51  
52  
53  
54  
55  
56  
57  
58  
59  
60
- 31.** Moise N, Khodneva Y, Richman J, et al. Elucidating the Association Between Depressive Symptoms, Coronary Heart Disease, and Stroke in Black and White Adults: The REasons for Geographic And Racial Differences in Stroke (REGARDS) Study. *J Am Heart Assoc.* 2016;5.
- 32.** Kuyken W, Warren FC, Taylor RS, et al. Efficacy of Mindfulness-Based Cognitive Therapy in Prevention of Depressive Relapse: An Individual Patient Data Meta-analysis From Randomized Trials. *JAMA Psychiatry.* 2016;73:565-574.

## ACKNOWLEDGEMENTS

**Funding:** This research project is supported by a cooperative agreement U01 NS041588 from the National Institute of Neurological Disorders and Stroke, National Institutes of Health, Department of Health and Human Service. The REGARDS study was supported by NIH grant 2U01NS041588; REGARDS-MI study was supported by NIH grants R01 HL080477 and K24 HL111154. The content is solely the responsibility of the authors and does not necessarily represent the official views of the National Institute of Neurological Disorders and Stroke or the National Institutes of Health. Representatives of the funding agency have been involved in the review of the manuscript but not directly involved in the collection, management, analysis, or interpretation of the data. The authors thank the other investigators, the staff, and the participants of the REGARDS study for their valuable contributions. A full list of participating REGARDS investigators and institutions can be found at <http://www.regardsstudy.org>. This work was also supported by funds from NHLBI (3 R01 HL114924-03S1; HL080477; and K24 HL111154).

**Disclosures:** All authors have completed the ICMJE uniform disclosure form at [www.icmje.org/coi\\_disclosure.pdf](http://www.icmje.org/coi_disclosure.pdf) and declare: no support from any organisation for the submitted work; no financial relationships with any organisations that might have an interest in the submitted work in the previous three years; no other relationships or activities that could appear to have influenced the submitted work.

**Author Contributions:** Drs. Yulia Khodneva and Joshua Richman had full access to all the data in the study and take responsibility for the integrity of the data and the accuracy of the data analysis. *Study concept and design:* Moise, Khodneva, Safford; *Acquisition of data:* Khodneva, Safford; *Analysis and interpretation of data:* Khodneva, Moise, Jannat-Khah, Richman, Kronish, Shaffer, Safford; *Drafting of the manuscript:* Moise, Khodneva *Critical revision of manuscript for important intellectual content:* Moise, Khodneva, Jannat-Khah, Richman, Kronish, Davidson,

1 Shaffer, Safford; *Statistical analysis*: Khodneva, Jannat-Khah; *Obtained funding*: Safford; *Study*  
2  
3 *supervision*: Safford  
4

5 **Conflict of Interest:** None  
6  
7

8  
9 **Copyright:** The Corresponding Author has the right to grant on behalf of all authors and does grant  
10 on behalf of all authors, a worldwide licence to the Publishers and its licensees in perpetuity, in all  
11 forms, formats and media (whether known now or created in the future), to i) publish, reproduce,  
12 distribute, display and store the Contribution, ii) translate the Contribution into other languages,  
13 create adaptations, reprints, include within collections and create summaries, extracts and/or,  
14 abstracts of the Contribution, iii) create any other derivative work(s) based on the Contribution, iv)  
15 to exploit all subsidiary rights in the Contribution, v) the inclusion of electronic links from the  
16 Contribution to third party material where-ever it may be located; and, vi) licence any third party to  
17 do any or all of the above.  
18  
19

20  
21 **Transparency:** Dr. Moise affirms that the manuscript is an honest, accurate, and transparent  
22 account of the study being reported; that no important aspects of the study have been omitted; and  
23 that any discrepancies from the study as planned (and, if relevant, registered) have been explained.  
24  
25

26  
27 **Data Sharing:** Patient level data or full dataset or technical appendix or statistical code are  
28 available if deemed important by reviewers with open access by Monika Safford at Weill Cornell,  
29 Nathalie Moise at Columbia University Medical Center, and Yulia Khodneva at University of  
30 Alabama at Birmingham. Patient consent was not obtained but the presented data are anonymised  
31 and risk of identification is low.  
32  
33  
34  
35  
36  
37  
38  
39  
40  
41  
42  
43  
44  
45  
46  
47  
48  
49  
50  
51  
52  
53  
54  
55  
56  
57  
58  
59  
60

1  
2  
3  
4  
5  
6  
7  
8  
9  
10  
11  
12  
13  
14  
15  
16  
17  
18  
19  
20  
21  
22  
23  
24  
25  
26  
27  
28  
29  
30  
31  
32  
33  
34  
35  
36  
37  
38  
39  
40  
41  
42  
43  
44  
45  
46  
47  
48  
49  
50  
51  
52  
53  
54  
55  
56  
57  
58  
59  
60

**Figure Legend**

**Figure 1.** Cohort Flow Diagram: Exclusion cascade of depressive symptoms to mortality endpoints analysis.

For peer review only



Figure 1. Consort Diagram

279x215mm (300 x 300 DPI)

## Supplementary Material

**eTable 1. Proportion of persons with elevated depressive symptoms by baseline self-reported health status (original categories, without collapsing).**

| Self-reported general health | Baseline                      |               |          | Second CES-D                    |               |          | Third CES-D                      |               |          |
|------------------------------|-------------------------------|---------------|----------|---------------------------------|---------------|----------|----------------------------------|---------------|----------|
|                              | CES-D<4, n, %                 | CES-D≥4, n, % | Total, n | CESD<4, n, %                    | CES-D≥4, n, % | Total, n | CESD<4, n, %                     | CES-D≥4, n, % | Total, n |
| <b>Excellent</b>             | 4515<br>95.9 %                | 195<br>4.1%   | 4710     | 3444<br>94.7%                   | 194<br>5.3%   | 3638     | 2109<br>94.6%                    | 120<br>5.4%   | 2229     |
| <b>Very good</b>             | 8450<br>94.1%                 | 530<br>5.9%   | 8980     | 6332<br>93.0%                   | 478<br>7.0%   | 6810     | 3938<br>92.8%                    | 305<br>7.2%   | 4243     |
| <b>Good</b>                  | 9181<br>89.1%                 | 1124<br>10.9% | 10305    | 6363<br>88.6%                   | 818<br>11.4%  | 7181     | 3717<br>88.9%                    | 464<br>11.1%  | 4181     |
| <b>Fair</b>                  | 3424<br>77.8 %                | 975<br>22.2 % | 4399     | 2185<br>79.7%                   | 556<br>20.3%  | 2741     | 1236<br>82.0%                    | 271<br>18.0%  | 1507     |
| <b>Poor</b>                  | 614<br>59.2%                  | 424<br>40.9%  | 1038     | 322<br>61.2%                    | 204<br>38.8%  | 526      | 177<br>65.3%                     | 94<br>34.7%   | 271      |
|                              |                               |               | 29432    |                                 |               | 20896    |                                  |               | 12431    |
|                              | <b>Frequency Missing = 59</b> |               |          | <b>Frequency Missing = 8595</b> |               |          | <b>Frequency Missing = 17060</b> |               |          |



**eTable 2. Reasons for non-cardiovascular disease death in the REGARDS study**

| <i>Causes of Death</i>            | Overall                 |         | Self-reported general health as “excellent or very good”<br>n=13,711 |                         | Self-reported general health as “poor, fair or good”<br>n=15,780 |         |
|-----------------------------------|-------------------------|---------|----------------------------------------------------------------------|-------------------------|------------------------------------------------------------------|---------|
|                                   | n                       | Percent | Frequency                                                            | Percent                 | Frequency                                                        | Percent |
| Cancer                            | 1226                    | 44.3    | 474                                                                  | 54.0                    | 747                                                              | 39.7    |
| Accidents/Injury/Suicide/Homicide | 164                     | 5.9     | 52                                                                   | 5.9                     | 111                                                              | 5.9     |
| Suicide                           | 3                       | 0.1     | 2                                                                    | 0.2                     | 1                                                                | 0.05    |
| Liver disease                     | 56                      | 2.0     | 14                                                                   | 1.6                     | 42                                                               | 2.2     |
| Infection                         | 498                     | 18.0    | 132                                                                  | 15.0                    | 365                                                              | 19.4    |
| ESRD                              | 119                     | 4.3     | 23                                                                   | 2.6                     | 95                                                               | 5.1     |
| Dementia                          | 187                     | 6.8     | 74                                                                   | 8.4                     | 112                                                              | 6.0     |
| COPD                              | 247                     | 8.9     | 43                                                                   | 4.9                     | 204                                                              | 10.9    |
| Pulmonary Embolism                | 38                      | 1.34    | 11                                                                   | 1.3                     | 27                                                               | 1.4     |
| Other                             | 232                     | 8.4     | 55                                                                   | 6.3                     | 177                                                              | 9.4     |
|                                   | Frequency Missing = 263 |         |                                                                      | Frequency Missing = 272 |                                                                  |         |

**eFigure 1. Percent of participants with depression measured at baseline who had their second and third follow up measured by years of follow up.**



\*"Percent" is a proportion of participants reporting CES-D scores at certain times of all participants available for either 2<sup>nd</sup> follow-up (blue) or 3<sup>rd</sup> follow-up (red).

Time since preceding measurement (baseline or second follow-up), years

|              | Participants, n | Mean | SD  | Minimum | Maximum |
|--------------|-----------------|------|-----|---------|---------|
| Second CES-D | 20934           | 4.8  | 1.5 | 0.9     | 9.7     |
| Third CES-D  | 12451           | 2.1  | 0.4 | 1.0     | 4.2     |

eFigure 2. Timing of CES-D follow up measures in REGARDS by self reported health at baseline.



\*"Percent" is a proportion of participants reporting CES-D scores at certain times, of all participants available for either 2<sup>nd</sup> follow-up (blue) or 3<sup>rd</sup> follow-up (red).

|              | Self-reported general health as "excellent or very good" |                                                                              |     |         |         | Self-reported general health as "poor, fair or good" |                                                                              |     |         |         |
|--------------|----------------------------------------------------------|------------------------------------------------------------------------------|-----|---------|---------|------------------------------------------------------|------------------------------------------------------------------------------|-----|---------|---------|
|              |                                                          | Time since preceding CES-D measurement (baseline or second follow-up), years |     |         |         |                                                      | Time since preceding CES-D measurement (baseline or second follow-up), years |     |         |         |
|              | N                                                        | Mean                                                                         | SD  | Minimum | Maximum | N                                                    | Mean                                                                         | SD  | Minimum | Maximum |
| Second CES-D | 10448                                                    | 4.8                                                                          | 1.5 | 0.9     | 9.7     | 10448                                                | 4.8                                                                          | 1.5 | 0.9     | 9.5     |
| Third CES-D  | 6472                                                     | 2.1                                                                          | 0.4 | 1.7     | 4.2     | 5959                                                 | 2.1                                                                          | 0.5 | 1.0     | 4.2     |

**eTable 3. Baseline characteristics of REGARDS participants who had all 3 CES-D measures vs. those with 1 or 2 CES-D measures**

| Characteristics                                          | 1 or 2 CES-D measures<br>(n=17,040) | All 3 CES-D measures<br>(n=12, 451) | <i>p</i> value |
|----------------------------------------------------------|-------------------------------------|-------------------------------------|----------------|
| <b><i>Socio-demographics</i></b>                         |                                     |                                     |                |
| Age, <i>M</i> (SD)                                       | 65.0 +- 10.0                        | 64.7 +- 8.5                         | 0.0069         |
| Female, n (%)                                            | 9300 (54.6)                         | 6945 (55.8)                         | 0.04           |
| African American, n (%)                                  | 7709 (45.2)                         | 4420 (35.5)                         | <.001          |
| Less than high school education, n (%)                   | 2583 (15.2)                         | 1113 (8.9)                          | <.001          |
| Annual Household Income, n (%)                           |                                     |                                     | <.001          |
| Less than \$20,000                                       | 3549 (20.8)                         | 1773 (14.2)                         |                |
| No Health Insurance, n (%)                               | 1290 (7.6)                          | 636 (5.1)                           | <.001          |
| Region, n (%)                                            |                                     |                                     | <.001          |
| Stroke belt                                              | 5806 (34.1)                         | 4387 (35.2)                         |                |
| Stroke buckle                                            | 3887 (22.8)                         | 2301 (18.5)                         |                |
| Non-stroke belt or buckle                                | 7347 (43.1)                         | 5763 (46.3)                         |                |
| <b><i>General health and medical conditions</i></b>      |                                     |                                     |                |
| Self-reported general health, n (%)                      |                                     |                                     | <.001          |
| Poor, fair, good                                         | 9783 (57.5)                         | 5959 (47.9)                         |                |
| Excellent, very good                                     | 7218 (42.5)                         | 6472 (52.1)                         |                |
| Cardiovascular disease (CHD, stroke, PAD, AA), n (%)     | 4379 (25.7)                         | 2446 (19.6)                         | <.001          |
| Diabetes, n (%)                                          | 4083 (25.0)                         | 2169 (18.0)                         | <.001          |
| COPD, n (%)                                              | 1612 (9.5)                          | 1098 (8.8)                          | 0.05           |
| Physical component score on SF-12 scale, <i>M</i> (SD)   | 45.5 +- 11.0                        | 47.6 +- 9.9                         | <.001          |
| <b><i>Physiological risk factors</i></b>                 |                                     |                                     |                |
| Body Mass Index, kg/m <sup>2</sup> , <i>M</i> (SD)       | 29.4 +- 6.3                         | 29.2 +- 6.0                         | 0.0024         |
| Systolic Blood Pressure, mmHg, <i>M</i> (SD)             | 128.0 +- 17.2                       | 127.0 +- 15.9                       | <.001          |
| Total Cholesterol, mg/dL, <i>M</i> (SD)                  | 192.2 +- 41.0                       | 191.9 +- 39.0                       | 0.5732         |
| High-Density Lipoprotein, mg/dL, <i>M</i> (SD)           | 51.4 +- 16.1                        | 52.4 +- 16.3                        | <.001          |
| QT Interval, corrected for heart rate, ms, <i>M</i> (SD) | 408.4 +- 24.2                       | 406.3 +- 22.7                       | <.001          |
| High-Sensitivity C-Reactive Protein, mg/L, median, IQR   | 2.3[1.0-5.4]                        | 2.1[0.9-4.7]                        | <.001          |

|    |                                                      |               |               |       |
|----|------------------------------------------------------|---------------|---------------|-------|
| 1  | Albumin to Creatinine Ratio, mg/g, median,           |               |               |       |
| 2  | IQR                                                  | 7.9[4.8-18.7] | 6.9[4.5-13.5] | <.001 |
| 3  | <b>Medications</b>                                   |               |               |       |
| 4  | Antihypertensive medication use, n (%)               | 9079 (53.9)   | 6118 (49.7)   | <.001 |
| 5  | Statin use, n (%)                                    | 5344 (31.4)   | 3951 (31.8)   | 0.53  |
| 6  | Aspirin use, n (%)                                   | 7297 (42.8)   | 5493 (44.1)   | 0.03  |
| 7  | Antidepressant use, n (%)                            | 2440 (14.4)   | 1646 (13.2)   | 0.006 |
| 8  | <b>Behavioral risk factors</b>                       |               |               |       |
| 9  |                                                      |               |               |       |
| 10 | Self-reported smoking, pack years, <i>M</i> (SD)     | 14.5 +- 24.4  | 12.2 +- 21.0  | <.001 |
| 11 | Current Smoking, n(%)                                | 2786 (16.4)   | 1477 (11.9)   | <.001 |
| 12 | Alcohol use, n (%)                                   |               |               | <.001 |
| 13 | Heavy                                                | 652 (3.9)     | 520 (4.2)     |       |
| 14 | Moderate                                             | 5180 (31.1)   | 4446 (36.3)   |       |
| 15 | None                                                 | 10822 (65.0)  | 7294 (59.5)   |       |
| 16 | Physical inactivity, n (%)                           | 6150 (36.7)   | 3854 (31.3)   | <.001 |
| 17 | Medication non-adherence, n (%)                      | 4548 (29.6)   | 3411 (29.9)   | 0.59  |
| 18 | Impaired cognitive status (Cognitive score $\leq$ 4) | 1300 (9.4)    | 588 (5.9)     | <.001 |
| 19 | Elevated perceived stress (PSS $\geq$ 5)             | 5437 (31.9)   | 3154 (25.3)   | <.001 |
| 20 |                                                      |               |               |       |
| 21 |                                                      |               |               |       |

22 *p* Values from chi square, Student t tests. CES-D = Centers for Epidemiology Studies – Depression scale. CVD =  
 23 cardiovascular disease. IQR = interquartile range. *M* = mean. SD = standard deviation.

24 Stroke Belt defined as the states of Alabama, Arkansas, Louisiana, Mississippi, Tennessee and the noncoastal regions  
 25 within the states of North Carolina, South Carolina and Georgia. Stroke buckle defined as coastal regions within the states  
 26 of North Carolina, South Carolina and Georgia.

27 Diabetes defined as fasting blood glucose  $\geq$ 126 or random glucose  $>$ 200 mL/dL or oral hypoglycemic or insulin use. CVD  
 28 defined as baseline coronary heart disease, stroke, periphery artery disease or aortic aneurism.

eFigure 3. Simon and Makuch plots of time-varying depressive symptoms and all-cause mortality, cardiovascular disease death, noncardiovascular disease death and cancer death.



STROBE Statement—Checklist of items that should be included in reports of *cohort studies*

|                           | Item No/Page #    | Recommendation                                                                                                                                                                 |
|---------------------------|-------------------|--------------------------------------------------------------------------------------------------------------------------------------------------------------------------------|
| <b>Title and abstract</b> | 1 (page 1-3)      | (a) Indicate the study's design with a commonly used term in the title or the <b>abstract</b>                                                                                  |
|                           | (Page 2-3)        | (b) Provide in the abstract an informative and balanced summary of what was done and what was found                                                                            |
| <b>Introduction</b>       |                   |                                                                                                                                                                                |
| Background/rationale      | 2 (Page 4)        | Explain the scientific background and rationale for the investigation being reported                                                                                           |
| Objectives                | 3 (pages 4-5)     | State specific objectives, including any prespecified hypotheses                                                                                                               |
| <b>Methods</b>            |                   |                                                                                                                                                                                |
| Study design              | 4 (Page 5 and 6)  | Present key elements of study design early in the paper                                                                                                                        |
| Setting                   | 5 (page 5-10),    | Describe the setting, locations, and relevant dates, including periods of recruitment, exposure, follow-up, and data collection                                                |
| Participants              | 6 (page 5-6, 8-9) | (a) Give the eligibility criteria, and the sources and methods of selection of participants. Describe methods of follow-up                                                     |
|                           | n/a               | (b) For matched studies, give matching criteria and number of exposed and unexposed                                                                                            |
| Variables                 | 7 (page 6-8)      | Clearly define all outcomes, exposures, predictors, potential confounders, and effect modifiers. Give diagnostic criteria, if applicable                                       |
| Data sources/ measurement | 8 (pages 6-9)     | For each variable of interest, give sources of data and details of methods of assessment (measurement). Describe comparability of assessment methods if there is more than one |

|                        |                 |                                                                                                                                                                                                   |
|------------------------|-----------------|---------------------------------------------------------------------------------------------------------------------------------------------------------------------------------------------------|
|                        |                 | group                                                                                                                                                                                             |
| Bias                   | 9 (page 8-10)   | Describe any efforts to address potential sources of bias                                                                                                                                         |
| Study size             | 10 (page 10)    | Explain how the study size was arrived at                                                                                                                                                         |
| Quantitative variables | 11 (page 6-10)  | Explain how quantitative variables were handled in the analyses. If applicable, describe which groupings were chosen and why                                                                      |
| Statistical methods    | 12 (page 8-10)  | (a) Describe all statistical methods, including those used to control for confounding                                                                                                             |
|                        | Pages 9         | (b) Describe any methods used to examine subgroups and interactions                                                                                                                               |
|                        | Page 10         | (c) Explain how missing data were addressed                                                                                                                                                       |
|                        | Page 9          | (d) If applicable, explain how loss to follow-up was addressed                                                                                                                                    |
|                        | Page 9-10       | (e) Describe any sensitivity analyses                                                                                                                                                             |
| <b>Results</b>         |                 |                                                                                                                                                                                                   |
| Participants           | 13 (page 10)    | (a) Report numbers of individuals at each stage of study—eg numbers potentially eligible, examined for eligibility, confirmed eligible, included in the study, completing follow-up, and analysed |
|                        | Page 10         | (b) Give reasons for non-participation at each stage                                                                                                                                              |
|                        | Figure 1        | (c) Consider use of a flow diagram                                                                                                                                                                |
| Descriptive data       | 14 (page 10-11) | (a) Give characteristics of study participants (eg demographic, clinical, social) and information on exposures and potential confounders                                                          |
|                        | Page 10         | (b) Indicate number of participants with missing data for each variable of interest                                                                                                               |
|                        | Pages 12        | (c) Summarise follow-up time (eg, average and total amount)                                                                                                                                       |



|                          |                  |                                                                                                                                                                                                              |
|--------------------------|------------------|--------------------------------------------------------------------------------------------------------------------------------------------------------------------------------------------------------------|
| Outcome data             | 15 (page 11)     | Report numbers of outcome events or summary measures over time                                                                                                                                               |
| Main results             | 16 (pages 11-12) | (a) Give unadjusted estimates and, if applicable, confounder-adjusted estimates and their precision (eg, 95% confidence interval). Make clear which confounders were adjusted for and why they were included |
|                          | Page 7-8, 23-27  | (b) Report category boundaries when continuous variables were categorized                                                                                                                                    |
|                          | n/a              | (c) If relevant, consider translating estimates of relative risk into absolute risk for a meaningful time period                                                                                             |
| Other analyses           | 17 (pages 12)    | Report other analyses done—eg analyses of subgroups and interactions, and sensitivity analyses                                                                                                               |
| <b>Discussion</b>        |                  |                                                                                                                                                                                                              |
| Key results              | 18 (page 12)     | Summarise key results with reference to study objectives                                                                                                                                                     |
| Limitations              | 19 (pages 14-15) | Discuss limitations of the study, taking into account sources of potential bias or imprecision. Discuss both direction and magnitude of any potential bias                                                   |
| Interpretation           | 20 (page 12-13)  | Give a cautious overall interpretation of results considering objectives, limitations, multiplicity of analyses, results from similar studies, and other relevant evidence                                   |
| Generalisability         | 21 (page 14)     | Discuss the generalisability (external validity) of the study results                                                                                                                                        |
| <b>Other information</b> |                  |                                                                                                                                                                                                              |
| Funding                  | 22 (page 20)     | Give the source of funding and the role of the funders for the present study and, if applicable, for the original study on which the present                                                                 |

|  |  |                  |
|--|--|------------------|
|  |  | article is based |
|--|--|------------------|

\*Give information separately for exposed and unexposed groups.

**Note:** An Explanation and Elaboration article discusses each checklist item and gives methodological background and published examples of transparent reporting. The STROBE checklist is best used in conjunction with this article (freely available on the Web sites of PLoS Medicine at <http://www.plosmedicine.org/>, Annals of Internal Medicine at <http://www.annals.org/>, and Epidemiology at <http://www.epidem.com/>). Information on the STROBE Initiative is available at <http://www.strobe-statement.org>.

For peer review only
